# Supplementary material for: Biochemical Mapping of Pyrodinium bahamense Unveils Molecular Underpinnings behind Organismal Processes
Source: MDPI journal article supplement (doi:10.3390/ijms222413332), 2021-12-11
Supplement: s1 [file s1]

# In-depth biochemical mapping of *Pyrodinium bahamense* highlights the contribution of associated microorganisms to critical cellular processes

Bryan John J. Subong<sup>1,2</sup>, Zabrina Bernice L. Malto<sup>1</sup>, Arturo O. Lluisma<sup>1</sup>,  
Rhodora V. Azanza<sup>1</sup>, Lilibeth A. Salvador-Reyes<sup>1\*</sup>

<sup>1</sup> Marine Science Institute, University of the Philippines- Diliman, Velasquez St., UP Diliman, Quezon City, 1101 Philippines

<sup>2</sup> Present Address: Department of Chemistry, The University of Tokyo, 7-3-1 Hongo, Bunkyo City, Tokyo 113-8654 Japan

\*corresponding author: [lsreyes@msi.upd.edu.ph](mailto:lsreyes@msi.upd.edu.ph)

## Supplemental Figures

**Figure S1.** Biomass composition of *P. bahamense*.

**Figure S2.** Summary of unique and similar GeneInfo identifier (GI) numbers for the two biological replicates of *P. bahamense*.

**Figure S3.** Protein distribution based on taxonomy (A), protein ontology (B) and enzyme class (C).

**Figure S4.** Protein distribution based on molecular function (A), cellular component (B) and biological process (C).

**Figure S5.** REVIGO analysis of combined GO identifiers of proteins identified using various reference databases.

**Figure S6.** Toxin content of *P. bahamense*.

## Supplemental Tables

**Table S1.** Optimized MRM Transitions for Monosaccharide Standards

**Table S2.** Proteins from Potential Associated Bacterial Interactions

**Table S3.** Proteins involved in Toxin Biosynthesis

**Table S4.** Proteins involved in Arginine Biosynthesis

**Table S5.** Polyketide Synthesis-related Proteins

**Table S6.** Proteins Involved in Photosynthesis and Bioluminescence

**Table S7.** Proteins Involved in Circadian Rhythm and Growth

## Supplemental Datasets

**Data S1.** MASCOT\_NCBInr database search

The file contains a tabulated protein identification and annotation using MASCOT NCBInr database search.

**Data S2.** Protein identification across five reference taxa

The file contains a tabulated protein identification and annotation using various reference proteomes/transcriptomes of *Marinovum algicola*, *Alexandrium*, *Cylindrospermopsis raciborskii*, *Symbiodinium kawagutii* and *Pyrodinium bahamense*.

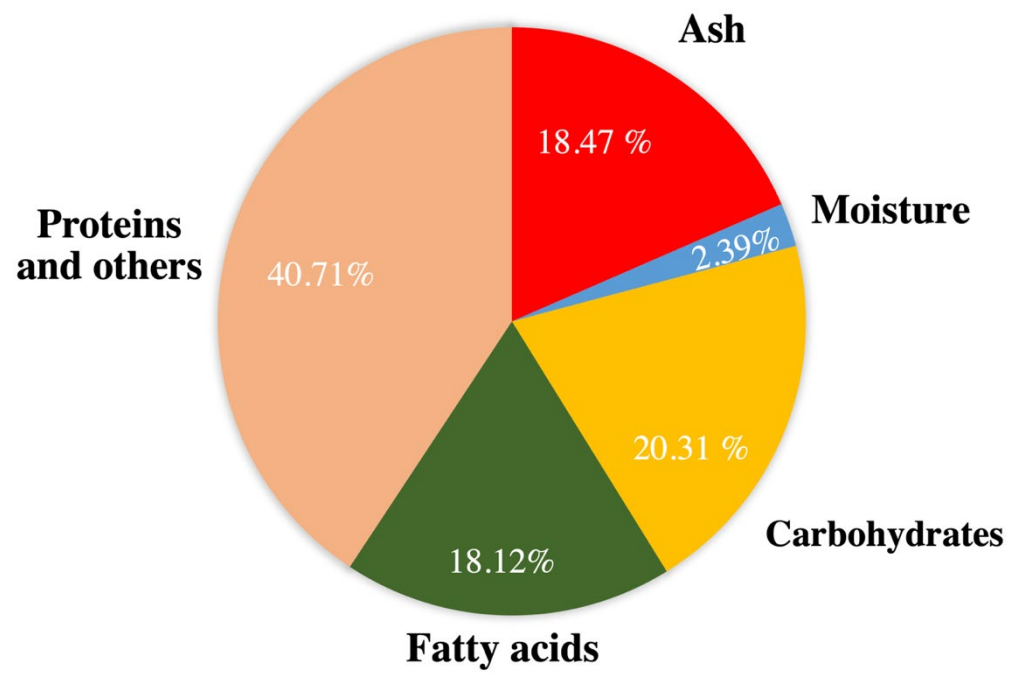

First Biological Replicate

Second Biological Replicate

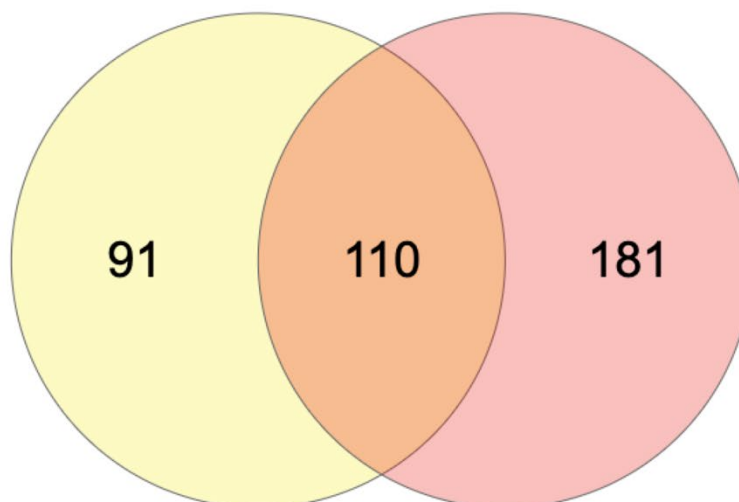

**Figure S2. Summary of unique and similar GeneInfo identifier (GI) numbers for the two biological replicates of *P. bahamense*.** 110 GI were common for both replicates while there were 91 and 181 unique GI numbers for the first and second biological replicate, respectively.

**A** PROTEIN IDENTIFICATION BASED ON TAXONOMY

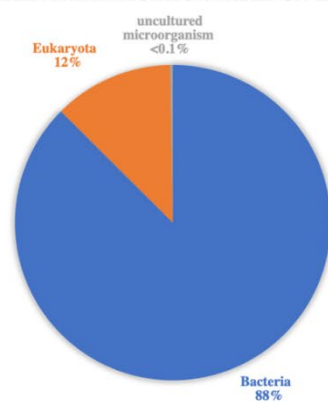

**B** PROTEIN DISTRIBUTION BASED ON ONTOLOGY

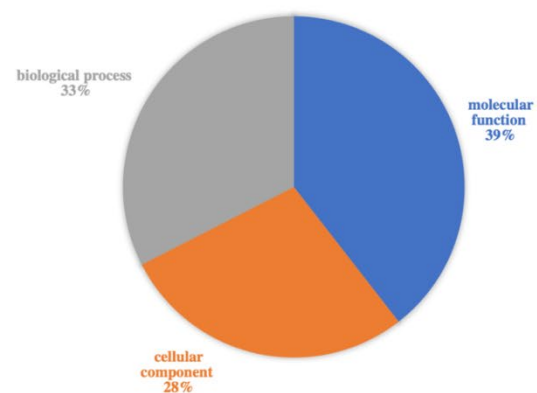

**C** PROTEIN DISTRIBUTION BASED ON ENZYME CLASS

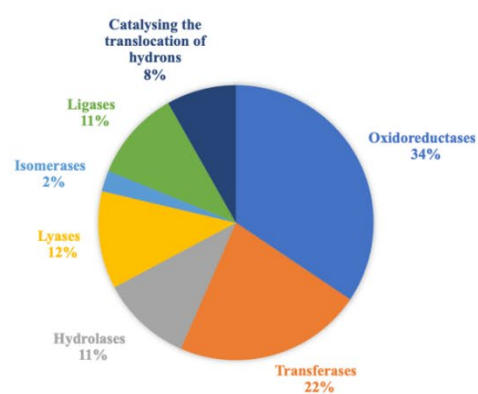

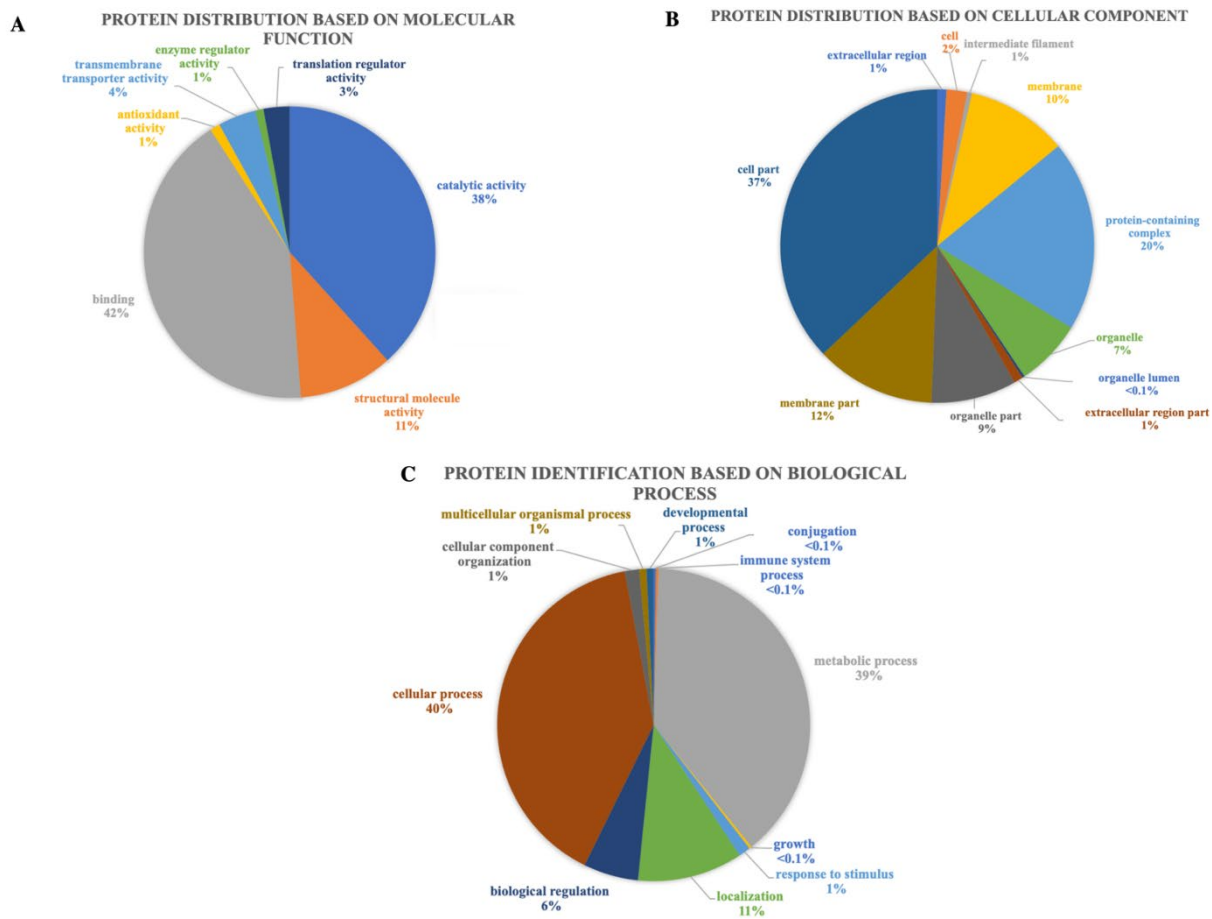

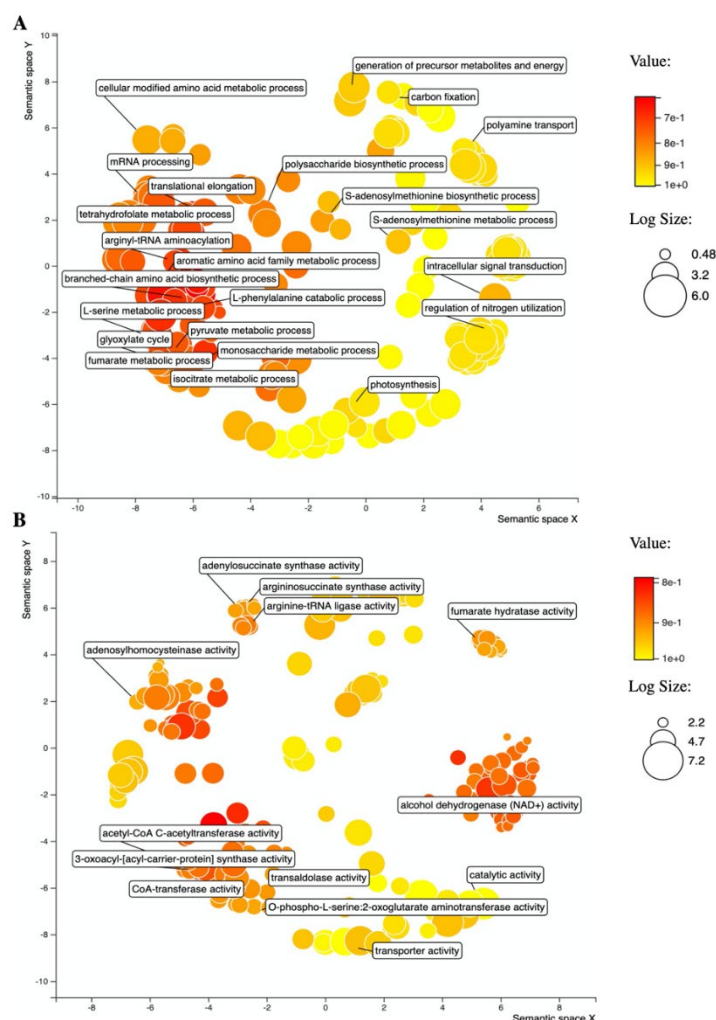

**Figure S5. REVIGO analysis of combined GO identifiers of proteins identified using various reference databases.** The GO identifiers obtained from proteins identified across different reference databases were visualized using REVIGO to map the various processes for *Pyrodicticum bahamense*. **A.)** Notable biological processes include amino acid biosynthesis and degradation, polysaccharide biosynthesis, S-adenosylmethionine biosynthesis and metabolism, glycolysis, and photosynthesis. **B.)** Meanwhile, important molecular functions include adenosylsuccinate synthase and adenosyl homocysteinase activity, glycolysis-related activities, catalysis and transporter activities. Bubble color indicates the p-values for the false discovery rates while the circle log size indicates the logarithmic frequency of the GO term.

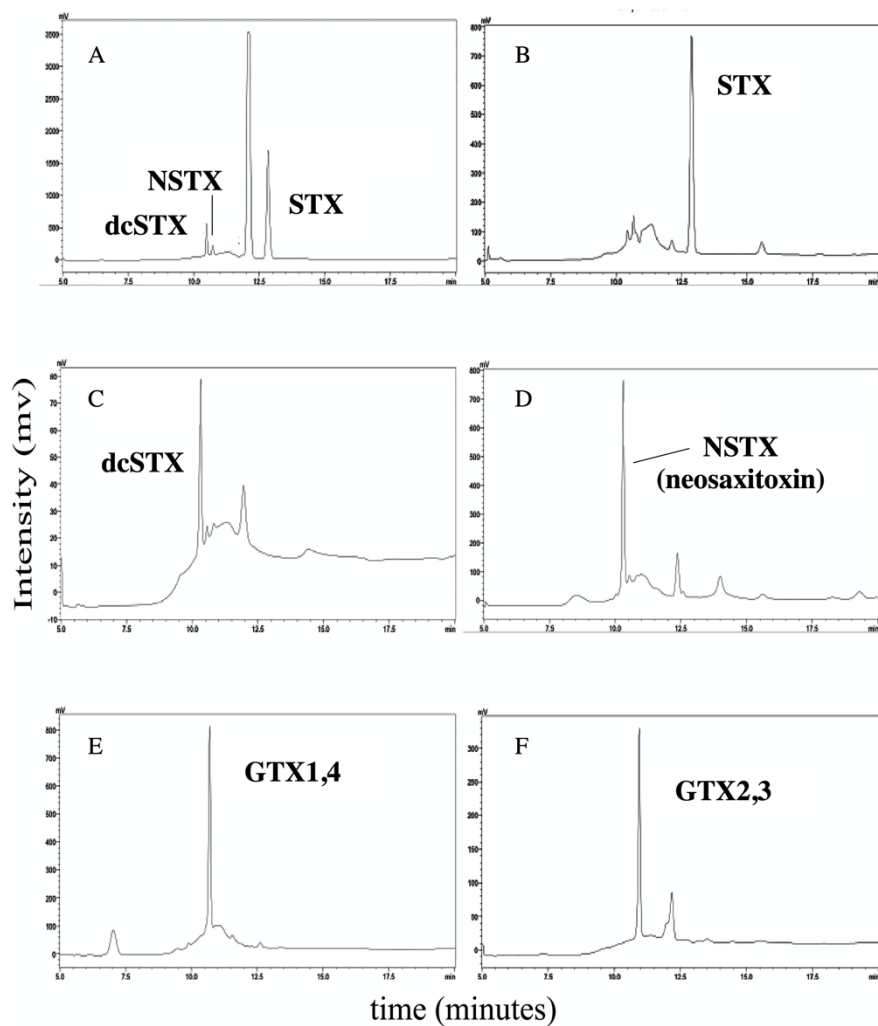

**Figure S6. Toxin content of *P. bahamense*.** A. A pre-column oxidation method for toxin content using available toxin standards for quantification was conducted based on the procedures of Subong, et al. 2017 and Subong, et al. 2021. Subcultured *P. bahamense* used for proteomic analysis showed toxin content of 200-215 fmol STX equiv/cell with toxin profiles consist of STX, neoSTX and dcSTX (A). Toxin content and profile was compared to standard B. saxitoxin (STX); C. decarbamoylsaxitoxin; D. neosaxitoxin (NSTX); E. gonyautoxin 1,4; F. gonyautoxin 2,3.

## Supplementary Tables

**Table S1. Optimized MRM Transitions for Monosaccharide Standards**

| Standard  | Transition      | Product m/z | CE |
|-----------|-----------------|-------------|----|
| Arabinose | 194.90 > 89.05  | 89.05       | 11 |
|           | 194.90 > 149.20 | 149.20      | 9  |
|           | 194.90 > 59.05  | 59.05       | 20 |
| Fructose  | 224.95 > 89.05  | 89.05       | 13 |
|           | 224.95 > 179.15 | 179.15      | 6  |
|           | 224.95 > 59.10  | 59.10       | 23 |
| Galactose | 224.90 > 89.05  | 89.05       | 12 |
|           | 224.90 > 179.15 | 179.15      | 7  |
|           | 224.90 > 59.10  | 59.10       | 22 |
| Glucose   | 224.95 > 179.15 | 179.15      | 7  |
|           | 224.95 > 89.05  | 89.05       | 12 |
|           | 224.95 > 59.05  | 59.05       | 23 |
| Mannose   | 224.95 > 179.15 | 179.15      | 7  |
|           | 224.95 > 119.10 | 119.10      | 10 |
|           | 224.95 > 89.10  | 89.10       | 13 |
| Ribose    | 194.90 > 149.20 | 149.20      | 8  |
|           | 194.90 > 89.05  | 89.05       | 12 |
|           | 194.90 > 59.10  | 59.10       | 20 |
| Xylose    | 194.90 > 89.05  | 89.05       | 11 |
|           | 194.90 > 149.20 | 149.20      | 9  |
|           | 194.90 > 59.10  | 59.10       | 17 |

**Table S2. Proteins from Potential Associated Bacterial Interactions**

| Protein                                                               | Number of peptides | Sequence Coverage (%) | Score | q-value | Function                                                       |
|-----------------------------------------------------------------------|--------------------|-----------------------|-------|---------|----------------------------------------------------------------|
| amino acid ABC transporter-substrate binding proteins**               | 1                  | 2.3                   | 132   | 0       | solute active transporter                                      |
| Sequence:<br>NTTWTFSRDTSMGLYF<br><br>[Cylindrospermopsis raciborskii] |                    |                       |       |         |                                                                |
| elongation Tu factor                                                  | 10                 | 32.5                  | 262   | 0       | catalysts for aminoacyl-tRNA (aa-tRNA) binding to the ribosome |
| [Alexandrium]                                                         |                    |                       |       |         |                                                                |
| RHS-repeat associated core-containing protein                         | 67                 | 38.1                  | 323   | 0       | bacterial exotoxin                                             |
| [Marinovum algicola]                                                  |                    |                       |       |         |                                                                |
| bifunctional folylpolyglutamate synthase/dihydrofolate synthase**     | 1                  | 2.9                   | 1.6*  | 0       | synthesis of folate                                            |
| Sequence:<br>VGAGQMSRVDSALIAA<br><br>[Marinovum algicola]             |                    |                       |       |         |                                                                |
| propionyl-CoA synthetase**                                            | 1                  | 8.7                   | 1.2*  | 0.007   | propanoate metabolism                                          |
| Sequence:<br>TFAELQTRVATLAGAL<br><br>[Marinovum algicola]             |                    |                       |       |         |                                                                |

---

|                               |   |     |       |       |                        |
|-------------------------------|---|-----|-------|-------|------------------------|
| acryloyl-CoA reductase        | 2 | 7.9 | 0.98* | 0.007 | L-alanine fermentation |
| [ <i>Marinovum algicola</i> ] |   |     |       |       |                        |

---

\* denotes MaxQuant Score; otherwise, MASCOT score is reported

\*\* unique peptide

**Table S3. Proteins involved in Toxin Biosynthesis**

| Protein                                                                                                                                                            | Number of peptides | Sequence Coverage (%) | Score | q-value | Function                           |
|--------------------------------------------------------------------------------------------------------------------------------------------------------------------|--------------------|-----------------------|-------|---------|------------------------------------|
| chlorophyll a/c- binding protein, partial<br>( <i>Alexandrium tamarense</i> )                                                                                      | 2                  | 9.1                   | 22*   | 0       | photosynthesis                     |
| RHS repeat-associated core domain-containing protein<br>[ <i>Marinovum algicola</i> ]                                                                              | 67                 | 38.1                  | 323   | 0       | bacterial exotoxin                 |
| contig07438 adenosylhomocysteinase<br>[Pbc transcript]                                                                                                             | 3                  | 16.4                  | 2.5*  | 0       | methylation                        |
| methyltetrahydropteroyltriglutamate-homocysteine S-methyltransferase activity**<br><br>Sequence:<br>GLITLNPKEAVSSLA<br>[ <i>Symbiodinium kawagutii</i> transcript] | 1                  | 0.7                   | 5.8*  | 0.0175  | L-methionine biosynthesis          |
| acetyl-CoA acetyltransferase<br>[ <i>Alexandrium</i> ]                                                                                                             | 2                  | 15                    | 17*   | 0       | transferase activity               |
| contig00523 methionine S-adenosyl transferase<br>[Pbc transcript]                                                                                                  | 2                  | 6.9                   | 5.00* | 0       | cysteine and methionine metabolism |
| periplasmic sensor hybrid histidine kinase **<br><br>Sequence:<br>GDLMVVSRPGHGATFF<br>[ <i>Alexandrium/ Mameiliella alba</i> ]                                     | 1                  | 2.5                   | 5.9*  | 0       | integral membrane component        |

|                                                                              |   |     |      |   |                     |
|------------------------------------------------------------------------------|---|-----|------|---|---------------------|
| iron-containing alcohol dehydrogenase **                                     | 1 | 2.2 | 6.2* | 0 | redox reaction      |
| Sequence:<br>TDVKMMMKHPSFTPQV<br>[Alexandrium/ Bacillus sp.]                 |   |     |      |   |                     |
| contig06470 ferredoxin-binding protein II<br>[Pbc transcript]                | 8 | 42  | 125* | 0 | photosynthesis      |
| ferredoxin-nitrite reductase **                                              | 1 | 2.5 | 6.0* | 0 | nitrogen metabolism |
| Sequence:<br>IPLNVVVKPEEVVSL<br>[Cylindrospermopsis raciborskii]             |   |     |      |   |                     |
| * denotes MaxQuant Score; MASCOT score if not indicated<br>** unique peptide |   |     |      |   |                     |

**Table S4. Proteins involved in Arginine Biosynthesis**

| Protein                                                                                                                                     | Number of peptides | Sequence Coverage (%) | Score | q-value | Function                           |
|---------------------------------------------------------------------------------------------------------------------------------------------|--------------------|-----------------------|-------|---------|------------------------------------|
| ornithine decarboxylase<br>[ <i>Marinovum algicola</i> ]                                                                                    | 3                  | 4.1                   | 5.3*  | 0       | polyamine synthesis                |
| argininosuccinate synthase<br>[ <i>Marinovum algicola</i> ]                                                                                 | 7                  | 21                    | 28*   | 0       | <i>argininosuccinate</i> synthesis |
| ornithine-acyl-ACP acyltransferase**<br><br>Sequence:<br>LAEDQIDRRRAMLQVP<br>[ <i>Alexandrium</i> ]                                         | 1                  | 6.8                   | 5.8*  | 0       | transferase activity               |
| bifunctional ornithine acetyltransferase/N-acetylglutamate synthase**<br><br>Sequence:<br>VGAGQMSRVDSALIAA<br>[ <i>Marinovum algicola</i> ] | 1                  | 2.9                   | 1.6*  | 0       | arginine biosynthesis              |

\* denotes MaxQuant Score; otherwise, MASCOT score is reported

\*\* unique peptide

**Table S5. Polyketide Synthesis-related Proteins**

| Protein                                                                                       | Number of peptides | Sequence Coverage (%) | Score | q-value | Function                                                 |
|-----------------------------------------------------------------------------------------------|--------------------|-----------------------|-------|---------|----------------------------------------------------------|
| type I polyketide synthase mixed NRPS/PKS (CyrB)<br>[ <i>Cylindrospermopsis raciborskii</i> ] | 2                  | 1.0                   | 12*   | 0       | polyketide synthesis and non-ribosomal peptide synthesis |
| beta-ketoacyl-ACP reductase<br>[ <i>Marinovum algicola</i> ]                                  | 2                  | 13                    | 34*   | 0       | type II Fatty acid biosynthesis                          |
| enoyl-[acyl-carrier-protein] reductase<br>[ <i>Marinovum algicola</i> ]                       | 3                  | 12                    | 3.6*  | 0       | type II fatty acid biosynthesis                          |
| ornithine-acyl-ACP acyltransferase **                                                         | 1                  | 6                     | 6.8*  | 0       | ornithine synthesis                                      |
| Sequence:<br>LAEDQIDRRRAMLQVP                                                                 |                    |                       |       |         |                                                          |
| [ <i>Alexandrium</i> ]                                                                        |                    |                       |       |         |                                                          |
| beta-ketoacyl-[acyl-carrier-protein] synthase II                                              | 9                  | 50                    | 20*   | 0       | fatty acid biosynthesis                                  |
| [ <i>Marinovum algicola</i> ]                                                                 |                    |                       |       |         |                                                          |
| 3-hydroxyacyl-[acyl-carrier-protein] dehydratase FabA                                         | 4                  | 34                    | 3.8*  | 0       | lipid A biosynthesis                                     |
| [ <i>Marinovum algicola</i> ]                                                                 |                    |                       |       |         |                                                          |

\* denotes MaxQuant Score; otherwise, MASCOT score is reported

\*\* unique peptide

**Table S6. Proteins Involved in Photosynthesis and Bioluminescence**

| Protein                                                                                  | Number of peptides | Sequence Coverage (%) | Score | q-value | Function        |
|------------------------------------------------------------------------------------------|--------------------|-----------------------|-------|---------|-----------------|
| Rubisco<br>[ <i>Symbiodinium</i> ]                                                       | 6                  | 7.7                   | 130*  | 0       | carbon fixation |
| peridinin chlorophyll a-binding protein precursor<br>[Pbc transcript]                    | 13                 | 47.9                  | 253*  | 0       | photosynthesis  |
| luciferin binding protein**<br><br>Sequence:<br>VAQETFTKMVQLARKL<br><br>[Pbc transcript] | 1                  | 3.7%                  | 1.0*  | 0       | bioluminescence |

\* denotes MaxQuant Score; otherwise, MASCOT score is reported

\*\* unique peptide

**Table S7. Proteins Involved in Circadian Rhythm and Growth**

| Protein                                                 | Number of peptides | Sequence Coverage (%) | Score | q-value | Function                                |
|---------------------------------------------------------|--------------------|-----------------------|-------|---------|-----------------------------------------|
| citrate synthase<br>[ <i>Marinovum algicola</i> ]       | 10                 | 29.9                  | 57*   | 0       | citric acid cycle                       |
| pyruvate kinase<br>[ <i>Marinovum algicola</i> ]        | 2                  | 7.5                   | 2.4*  | 0       | glycolysis                              |
| glyceraldehyde dehydrogenase**                          | 1                  | 4.3                   | 6.7*  | 0       | glycolysis                              |
| Sequence:<br>PTSTGAAKAVGLVLPE                           |                    |                       |       |         |                                         |
| [ <i>Marinovum algicola</i> ]                           |                    |                       |       |         |                                         |
| 2-oxoglutarate dehydrogenase**                          | 1                  | 2.3                   | 7.0*  | 0       | citric acid cycle                       |
| Sequence:<br>VDGSGDVKYHLGASSD<br>[ <i>Alexandrium</i> ] |                    |                       |       |         |                                         |
| succinyl-CoA-3-ketoacid COA transferase**               | 1                  | 7.7                   | 24*   | 0       | valine, leucine, isoleucine degradation |
| Sequence:<br>DTGNLVFRKTARNFNP                           |                    |                       |       |         |                                         |
| [ <i>Marinovum algicola</i> ]                           |                    |                       |       |         |                                         |
| tricarboxylate transporter**                            | 1                  | 9.4%                  | 2.0*  | 0.005   | citrate transporter                     |
| Sequence:<br>QGNLSIPRRMCAGLVG                           |                    |                       |       |         |                                         |
| [Pbc transcript]                                        |                    |                       |       |         |                                         |

\* denotes MaxQuant Score; otherwise, MASCOT score is reported; \*\* unique peptide

## References:

- Subong, B.J.J.; Benico, G.A.; Sulit, A.K.L.; Mendoza, C.O.; Cruz, L.J.; Azanza, R. V.; Jimenez, E.C. Toxicity and protein expression of *Alexandrium* species collected in the philippine waters. *Philipp. J. Sci.* **2017**, *146*, 425–436.
- Subong, B.J.J.; Lluisma, A.O.; Azanza, R. V.; Salvador-Reyes, L.A. Differentiating two closely related *Alexandrium* species using comparative quantitative proteomics. *Toxins (Basel)*. **2020**, *13*, DOI: 10.3390/toxins13010007, doi:10.3390/toxins13010007
