# Supplementary material for: Biochemical Mapping of Pyrodinium bahamense Unveils Molecular Underpinnings behind Organismal Processes
Source: Int J Mol Sci. 2021 Dec 11;22(24):13332. doi: 10.3390/ijms222413332 (PMC8706660; doi:10.3390/ijms222413332)
Supplement: Supplementary file 1 [file ijms-22-13332-s001.zip › Supplementary infor_Salvador-Reyes/Supplementary Dataset 1_Salvador-Reyes_Pyrodinium.xlsx]

## Sheet: First Biological Replicate
First Biological Replicate
Header	--------------------------------------------------------
Search title	16H146_Sample5_120M
Timestamp	2016-09-29T10:43:01Z
User	Orbitrap
Email	orbi@pfa
Report URI	http://192.168.1.183/mascot/cgi/master_results.pl?file=../data/20160928/F003525.dat
Peak list data path	LTQ_16H146_5_120M.mgf
Peak list format	Mascot generic
Search type	MIS
Mascot version	2.5.1
Database	NCBInr
Fasta file	NCBInr_20160721.fasta
Total sequences	90971994
Total residues	33504913701
Sequences after taxonomy filter	90971994
Number of queries	8236
Decoy	--------------------------------------------------------
Number of matches above identity threshold in search of real database	627
Number of matches above identity threshold in search of decoy database	41
Number of matches above homology threshold in search of real database	961
Number of matches above homology threshold in search of decoy database	82
Fixed modifications	--------------------------------------------------------
Identifier	Name	Delta	Neutral loss
1	Carbamidomethyl (C)	57.0215
Variable modifications	--------------------------------------------------------
Identifier	Name	Delta	Neutral loss(es)
1	Deamidated (NQ)	0.984016
2	Oxidation (M)	15.9949	0	63.9983
Search Parameters	--------------------------------------------------------
Taxonomy filter	All entries
Enzyme	Trypsin
Maximum Missed Cleavages	2
Fixed modifications	Carbamidomethyl (C)
Quantitation method	None
Variable modifications	Deamidated (NQ),Oxidation (M)
Peptide Mass Tolerance	5
Peptide Mass Tolerance Units	ppm
Fragment Mass Tolerance	0.6
Fragment Mass Tolerance Units	Da
Mass values	Monoisotopic
Instrument type	ESI-TRAP
Isotope error mode	0
Decoy database also searched	1
Format parameters	--------------------------------------------------------
Significance threshold	0.05
Max. number of hits	0
Use MudPIT protein scoring	0
Ions score cut-off	20
Include same-set proteins	0
Include sub-set proteins	0
Include unassigned	0
Require bold red	1
Use homology threshold	0
Group protein families	0
Re-score using Percolator	0
Show duplicate peptides	1
Protein hits	--------------------------------------------------------
prot_hit_num	prot_acc	prot_desc	prot_score	prot_mass	prot_matches	prot_matches_sig	prot_sequences	prot_sequences_sig	pep_query	pep_rank	pep_isbold	pep_isunique	pep_exp_mz	pep_exp_mr	pep_exp_z	pep_calc_mr	pep_delta	pep_miss	pep_score	pep_expect	pep_res_before	pep_seq	pep_res_after	pep_var_mod	pep_var_mod_pos	pep_summed_mod_pos	pep_local_mod_pos	pep_scan_title
1	gi|872560108	RHS repeat-associated core domain-containing protein [Marinovum algicola]	1890	293482	58	22	33	12	1538	1	1	0	421.742	841.47	2	841.47	-0.0001	0	40.61	1.5	R	LWLPDAK	I					Elution from: 56.033 to 56.033 period: 0 experiment: 1 cycles: 1 precIntensity: 64583.0 FinneganScanNumber: 4925 MStype: enumIsNormalMS rawFile: 16H146_5_120M.raw
1	gi|872560108	RHS repeat-associated core domain-containing protein [Marinovum algicola]	1890	293482	58	22	33	12	1833	1	1	0	456.24	910.465	2	910.466	-0.0008	0	44.2	0.56	R	FYGAQIGR	F					Elution from: 32.925 to 32.925 period: 0 experiment: 1 cycles: 1 precIntensity: 56358.0 FinneganScanNumber: 2482 MStype: enumIsNormalMS rawFile: 16H146_5_120M.raw
1	gi|872560108	RHS repeat-associated core domain-containing protein [Marinovum algicola]	1890	293482	58	22	33	12	2036	2	1	1	474.243	946.472	2	946.472	-0.0003	0	31.27	25	K	IEANGVTSR	S	Deamidated (NQ)	0.000100000.0			Elution from: 13.617 to 13.617 period: 0 experiment: 1 cycles: 1 precIntensity: 13698.0 FinneganScanNumber: 627 MStype: enumIsNormalMS rawFile: 16H146_5_120M.raw
1	gi|872560108	RHS repeat-associated core domain-containing protein [Marinovum algicola]	1890	293482	58	22	33	12	2037	3	1	1	474.243	946.472	2	946.472	0	0	26.78	77	K	IEANGVTSR	S	Deamidated (NQ)	0.000100000.0			Elution from: 14.208 to 14.208 period: 0 experiment: 1 cycles: 1 precIntensity: 15454.0 FinneganScanNumber: 676 MStype: enumIsNormalMS rawFile: 16H146_5_120M.raw
1	gi|872560108	RHS repeat-associated core domain-containing protein [Marinovum algicola]	1890	293482	58	22	33	12	2369	2	1	1	501.766	1001.52	2	1001.52	-0.0014	0	28.89	48	R	FAAINGPSPK	T	Deamidated (NQ)	0.0000100000.0			Elution from: 29.330 to 29.330 period: 0 experiment: 1 cycles: 1 precIntensity: 37791.0 FinneganScanNumber: 2118 MStype: enumIsNormalMS rawFile: 16H146_5_120M.raw
1	gi|872560108	RHS repeat-associated core domain-containing protein [Marinovum algicola]	1890	293482	58	22	33	12	2370	2	1	1	501.766	1001.52	2	1001.52	-0.0014	0	29.8	39	R	FAAINGPSPK	T	Deamidated (NQ)	0.0000100000.0			Elution from: 27.187 to 27.187 period: 0 experiment: 1 cycles: 1 precIntensity: 57016.0 FinneganScanNumber: 1904 MStype: enumIsNormalMS rawFile: 16H146_5_120M.raw
1	gi|872560108	RHS repeat-associated core domain-containing protein [Marinovum algicola]	1890	293482	58	22	33	12	2462	3	1	0	509.24	1016.47	2	1016.47	-0.0012	0	39.51	1.1	K	DWSAGAAPSR	L					Elution from: 20.540 to 20.540 period: 0 experiment: 1 cycles: 1 precIntensity: 32359.0 FinneganScanNumber: 1260 MStype: enumIsNormalMS rawFile: 16H146_5_120M.raw
1	gi|872560108	RHS repeat-associated core domain-containing protein [Marinovum algicola]	1890	293482	58	22	33	12	2463	1	1	0	509.24	1016.47	2	1016.47	-0.0011	0	41.09	0.76	K	DWSAGAAPSR	L					Elution from: 20.580 to 20.580 period: 0 experiment: 1 cycles: 1 precIntensity: 58182.0 FinneganScanNumber: 1264 MStype: enumIsNormalMS rawFile: 16H146_5_120M.raw
1	gi|872560108	RHS repeat-associated core domain-containing protein [Marinovum algicola]	1890	293482	58	22	33	12	2470	1	1	0	510.266	1018.52	2	1018.52	-0.0022	0	25.33	50	R	VEVFNAQGR	Q					Elution from: 26.995 to 26.995 period: 0 experiment: 1 cycles: 1 precIntensity: 23810.0 FinneganScanNumber: 1886 MStype: enumIsNormalMS rawFile: 16H146_5_120M.raw
1	gi|872560108	RHS repeat-associated core domain-containing protein [Marinovum algicola]	1890	293482	58	22	33	12	2471	1	1	0	510.267	1018.52	2	1018.52	0	0	32.37	18	R	VEVFNAQGR	Q					Elution from: 26.845 to 26.845 period: 0 experiment: 1 cycles: 1 precIntensity: 36496.0 FinneganScanNumber: 1872 MStype: enumIsNormalMS rawFile: 16H146_5_120M.raw
1	gi|872560108	RHS repeat-associated core domain-containing protein [Marinovum algicola]	1890	293482	58	22	33	12	2871	1	1	0	552.788	1103.56	2	1103.56	-0.0002	0	33.84	15	R	EVFEASPLGR	T					Elution from: 46.403 to 46.403 period: 0 experiment: 1 cycles: 1 precIntensity: 67520.0 FinneganScanNumber: 3894 MStype: enumIsNormalMS rawFile: 16H146_5_120M.raw
1	gi|872560108	RHS repeat-associated core domain-containing protein [Marinovum algicola]	1890	293482	58	22	33	12	2872	2	1	0	552.788	1103.56	2	1103.56	0.0006	0	21.63	240	R	EVFEASPLGR	T					Elution from: 48.925 to 48.925 period: 0 experiment: 1 cycles: 1 precIntensity: 20123.0 FinneganScanNumber: 4158 MStype: enumIsNormalMS rawFile: 16H146_5_120M.raw
1	gi|872560108	RHS repeat-associated core domain-containing protein [Marinovum algicola]	1890	293482	58	22	33	12	2873	1	1	0	552.788	1103.56	2	1103.56	0.0006	0	29.8	37	R	EVFEASPLGR	T					Elution from: 46.340 to 46.340 period: 0 experiment: 1 cycles: 1 precIntensity: 98968.0 FinneganScanNumber: 3887 MStype: enumIsNormalMS rawFile: 16H146_5_120M.raw
1	gi|872560108	RHS repeat-associated core domain-containing protein [Marinovum algicola]	1890	293482	58	22	33	12	3119	1	1	0	576.314	1150.61	2	1150.61	-0.0004	0	32.96	9.8	R	YLVASFPGAAR	S					Elution from: 58.683 to 58.683 period: 0 experiment: 1 cycles: 1 precIntensity: 111958.0 FinneganScanNumber: 5203 MStype: enumIsNormalMS rawFile: 16H146_5_120M.raw
1	gi|872560108	RHS repeat-associated core domain-containing protein [Marinovum algicola]	1890	293482	58	22	33	12	3486	2	1	0	604.831	1207.65	2	1207.64	0.0022	0	30.05	21	K	ATQTVVEYGIK	A					Elution from: 37.593 to 37.593 period: 0 experiment: 1 cycles: 1 precIntensity: 36454.0 FinneganScanNumber: 2957 MStype: enumIsNormalMS rawFile: 16H146_5_120M.raw
1	gi|872560108	RHS repeat-associated core domain-containing protein [Marinovum algicola]	1890	293482	58	22	33	12	3597	1	1	0	615.331	1228.65	2	1228.65	-0.0005	0	42.6	1.5	R	VMTLALPEEAR	A					Elution from: 65.338 to 65.338 period: 0 experiment: 1 cycles: 1 precIntensity: 44287.0 FinneganScanNumber: 5913 MStype: enumIsNormalMS rawFile: 16H146_5_120M.raw
1	gi|872560108	RHS repeat-associated core domain-containing protein [Marinovum algicola]	1890	293482	58	22	33	12	3857	2	1	0	634.289	1266.56	2	1266.57	-0.002	0	23.87	58	R	LDWTSGQMTGR	V	Oxidation (M)	0.00000002000.0			Elution from: 29.943 to 29.943 period: 0 experiment: 1 cycles: 1 precIntensity: 23218.0 FinneganScanNumber: 2178 MStype: enumIsNormalMS rawFile: 16H146_5_120M.raw
1	gi|872560108	RHS repeat-associated core domain-containing protein [Marinovum algicola]	1890	293482	58	22	33	12	4071	2	1	0	643.852	1285.69	2	1285.69	0.0027	0	27.59	51	K	SLLIEEQIDAR	G					Elution from: 112.242 to 112.242 period: 0 experiment: 1 cycles: 1 precIntensity: 62680.0 FinneganScanNumber: 10260 MStype: enumIsNormalMS rawFile: 16H146_5_120M.raw
1	gi|872560108	RHS repeat-associated core domain-containing protein [Marinovum algicola]	1890	293482	58	22	33	12	4703	1	1	1	678.866	1355.72	2	1355.72	-0.0014	0	43.49	1.1	R	WQSVDITPAALR	N					Elution from: 74.235 to 74.235 period: 0 experiment: 1 cycles: 1 precIntensity: 63823.0 FinneganScanNumber: 6810 MStype: enumIsNormalMS rawFile: 16H146_5_120M.raw
1	gi|872560108	RHS repeat-associated core domain-containing protein [Marinovum algicola]	1890	293482	58	22	33	12	4704	1	1	1	678.867	1355.72	2	1355.72	-0.0008	0	52.13	0.14	R	WQSVDITPAALR	N					Elution from: 74.295 to 74.295 period: 0 experiment: 1 cycles: 1 precIntensity: 81361.0 FinneganScanNumber: 6816 MStype: enumIsNormalMS rawFile: 16H146_5_120M.raw
1	gi|872560108	RHS repeat-associated core domain-containing protein [Marinovum algicola]	1890	293482	58	22	33	12	5157	1	1	0	706.839	1411.66	2	1411.66	0.0007	0	54.61	0.068	R	SFEFNDAAVGDIK	T					Elution from: 105.702 to 105.702 period: 0 experiment: 1 cycles: 1 precIntensity: 43862.0 FinneganScanNumber: 9614 MStype: enumIsNormalMS rawFile: 16H146_5_120M.raw
1	gi|872560108	RHS repeat-associated core domain-containing protein [Marinovum algicola]	1890	293482	58	22	33	12	5158	1	1	0	706.857	1411.7	2	1411.7	0.0003	0	22.38	150	K	ITYPGGAEASVGYK	E					Elution from: 44.243 to 44.243 period: 0 experiment: 1 cycles: 1 precIntensity: 67050.0 FinneganScanNumber: 3664 MStype: enumIsNormalMS rawFile: 16H146_5_120M.raw
1	gi|872560108	RHS repeat-associated core domain-containing protein [Marinovum algicola]	1890	293482	58	22	33	12	5195	1	1	0	709.869	1417.72	2	1417.72	-0.0016	0	39.12	3.9	K	SLVFAHEVPEYK	V					Elution from: 60.733 to 60.733 period: 0 experiment: 1 cycles: 1 precIntensity: 33134.0 FinneganScanNumber: 5422 MStype: enumIsNormalMS rawFile: 16H146_5_120M.raw
1	gi|872560108	RHS repeat-associated core domain-containing protein [Marinovum algicola]	1890	293482	58	22	33	12	5309	1	1	0	720.35	1438.68	2	1438.69	-0.0029	0	63.6	0.011	R	MTVSQFLADSQGR	L					Elution from: 80.765 to 80.765 period: 0 experiment: 1 cycles: 1 precIntensity: 27447.0 FinneganScanNumber: 7422 MStype: enumIsNormalMS rawFile: 16H146_5_120M.raw
1	gi|872560108	RHS repeat-associated core domain-containing protein [Marinovum algicola]	1890	293482	58	22	33	12	5310	1	1	0	720.352	1438.69	2	1438.69	0.0019	0	98.12	4e-06	R	MTVSQFLADSQGR	L					Elution from: 80.797 to 80.797 period: 0 experiment: 1 cycles: 1 precIntensity: 24056.0 FinneganScanNumber: 7425 MStype: enumIsNormalMS rawFile: 16H146_5_120M.raw
1	gi|872560108	RHS repeat-associated core domain-containing protein [Marinovum algicola]	1890	293482	58	22	33	12	5401	1	1	0	732.366	1462.72	2	1462.72	-0.0009	0	45.08	0.93	R	YVLTPLDDAEEAK	V					Elution from: 61.800 to 61.800 period: 0 experiment: 1 cycles: 1 precIntensity: 239400.0 FinneganScanNumber: 5541 MStype: enumIsNormalMS rawFile: 16H146_5_120M.raw
1	gi|872560108	RHS repeat-associated core domain-containing protein [Marinovum algicola]	1890	293482	58	22	33	12	5522	1	1	0	744.867	1487.72	2	1487.72	-0.0016	0	27.22	48	R	IVVETSGNGSPASDR	H					Elution from: 20.752 to 20.752 period: 0 experiment: 1 cycles: 1 precIntensity: 27298.0 FinneganScanNumber: 1281 MStype: enumIsNormalMS rawFile: 16H146_5_120M.raw
1	gi|872560108	RHS repeat-associated core domain-containing protein [Marinovum algicola]	1890	293482	58	22	33	12	5526	1	1	0	745.362	1488.71	2	1488.71	0.0038	0	76.4	0.0006	R	IVVETSGNGSPASDR	H	Deamidated (NQ)	0.000000010000000.0			Elution from: 20.817 to 20.817 period: 0 experiment: 1 cycles: 1 precIntensity: 37567.0 FinneganScanNumber: 1287 MStype: enumIsNormalMS rawFile: 16H146_5_120M.raw
1	gi|872560108	RHS repeat-associated core domain-containing protein [Marinovum algicola]	1890	293482	58	22	33	12	5888	1	1	1	786.882	1571.75	2	1571.75	0.0023	0	87.38	3.9e-05	R	IETVAGDAVSYEYR	A					Elution from: 53.550 to 53.550 period: 0 experiment: 1 cycles: 1 precIntensity: 77797.0 FinneganScanNumber: 4650 MStype: enumIsNormalMS rawFile: 16H146_5_120M.raw
1	gi|872560108	RHS repeat-associated core domain-containing protein [Marinovum algicola]	1890	293482	58	22	33	12	5896	1	1	0	788.427	1574.84	2	1574.84	-0.0021	0	33.21	15	R	NGDIGPVQVLPGGPQK	V					Elution from: 55.582 to 55.582 period: 0 experiment: 1 cycles: 1 precIntensity: 41609.0 FinneganScanNumber: 4876 MStype: enumIsNormalMS rawFile: 16H146_5_120M.raw
1	gi|872560108	RHS repeat-associated core domain-containing protein [Marinovum algicola]	1890	293482	58	22	33	12	5897	1	1	0	788.427	1574.84	2	1574.84	-0.002	0	43.01	1.5	R	NGDIGPVQVLPGGPQK	V					Elution from: 55.645 to 55.645 period: 0 experiment: 1 cycles: 1 precIntensity: 55077.0 FinneganScanNumber: 4883 MStype: enumIsNormalMS rawFile: 16H146_5_120M.raw
1	gi|872560108	RHS repeat-associated core domain-containing protein [Marinovum algicola]	1890	293482	58	22	33	12	6031	1	1	0	801.873	1601.73	2	1601.73	0	0	53.94	0.078	R	TGSSQFVYSDAGDLR	F					Elution from: 53.752 to 53.752 period: 0 experiment: 1 cycles: 1 precIntensity: 48604.0 FinneganScanNumber: 4674 MStype: enumIsNormalMS rawFile: 16H146_5_120M.raw
1	gi|872560108	RHS repeat-associated core domain-containing protein [Marinovum algicola]	1890	293482	58	22	33	12	6032	1	1	0	801.874	1601.73	2	1601.73	0.0007	0	50.03	0.19	R	TGSSQFVYSDAGDLR	F					Elution from: 53.823 to 53.823 period: 0 experiment: 1 cycles: 1 precIntensity: 39706.0 FinneganScanNumber: 4682 MStype: enumIsNormalMS rawFile: 16H146_5_120M.raw
1	gi|872560108	RHS repeat-associated core domain-containing protein [Marinovum algicola]	1890	293482	58	22	33	12	6155	1	1	0	814.371	1626.73	2	1626.73	-0.0041	0	28.77	20	R	VAEAYPDDGGFPYAR	E					Elution from: 56.912 to 56.912 period: 0 experiment: 1 cycles: 1 precIntensity: 37059.0 FinneganScanNumber: 5015 MStype: enumIsNormalMS rawFile: 16H146_5_120M.raw
1	gi|872560108	RHS repeat-associated core domain-containing protein [Marinovum algicola]	1890	293482	58	22	33	12	6156	1	1	0	814.374	1626.73	2	1626.73	0.0017	0	38.29	2	R	VAEAYPDDGGFPYAR	E					Elution from: 56.972 to 56.972 period: 0 experiment: 1 cycles: 1 precIntensity: 56057.0 FinneganScanNumber: 5021 MStype: enumIsNormalMS rawFile: 16H146_5_120M.raw
1	gi|872560108	RHS repeat-associated core domain-containing protein [Marinovum algicola]	1890	293482	58	22	33	12	6238	1	1	0	824.451	1646.89	2	1646.89	-0.0016	0	37.21	4.3	R	TGLAQYPEVSVVTGVK	T					Elution from: 73.693 to 73.693 period: 0 experiment: 1 cycles: 1 precIntensity: 35957.0 FinneganScanNumber: 6757 MStype: enumIsNormalMS rawFile: 16H146_5_120M.raw
1	gi|872560108	RHS repeat-associated core domain-containing protein [Marinovum algicola]	1890	293482	58	22	33	12	6239	1	1	0	824.451	1646.89	2	1646.89	-0.0016	0	44.8	0.75	R	TGLAQYPEVSVVTGVK	T					Elution from: 104.122 to 104.122 period: 0 experiment: 1 cycles: 1 precIntensity: 12270.0 FinneganScanNumber: 9475 MStype: enumIsNormalMS rawFile: 16H146_5_120M.raw
1	gi|872560108	RHS repeat-associated core domain-containing protein [Marinovum algicola]	1890	293482	58	22	33	12	6240	1	1	0	824.451	1646.89	2	1646.89	-0.0011	0	84.75	7.5e-05	R	TGLAQYPEVSVVTGVK	T					Elution from: 106.260 to 106.260 period: 0 experiment: 1 cycles: 1 precIntensity: 73979.0 FinneganScanNumber: 9665 MStype: enumIsNormalMS rawFile: 16H146_5_120M.raw
1	gi|872560108	RHS repeat-associated core domain-containing protein [Marinovum algicola]	1890	293482	58	22	33	12	6241	1	1	0	824.451	1646.89	2	1646.89	-0.001	0	71.77	0.0015	R	TGLAQYPEVSVVTGVK	T					Elution from: 106.190 to 106.190 period: 0 experiment: 1 cycles: 1 precIntensity: 74324.0 FinneganScanNumber: 9659 MStype: enumIsNormalMS rawFile: 16H146_5_120M.raw
1	gi|872560108	RHS repeat-associated core domain-containing protein [Marinovum algicola]	1890	293482	58	22	33	12	6259	1	1	0	826.442	1650.87	2	1650.87	0.0013	0	63.75	0.011	K	VSVPADAAGPGSNLAGLR	F					Elution from: 59.542 to 59.542 period: 0 experiment: 1 cycles: 1 precIntensity: 101260.0 FinneganScanNumber: 5293 MStype: enumIsNormalMS rawFile: 16H146_5_120M.raw
1	gi|872560108	RHS repeat-associated core domain-containing protein [Marinovum algicola]	1890	293482	58	22	33	12	6260	1	1	0	826.443	1650.87	2	1650.87	0.0026	0	75.18	0.00073	K	VSVPADAAGPGSNLAGLR	F					Elution from: 59.477 to 59.477 period: 0 experiment: 1 cycles: 1 precIntensity: 48184.0 FinneganScanNumber: 5287 MStype: enumIsNormalMS rawFile: 16H146_5_120M.raw
1	gi|872560108	RHS repeat-associated core domain-containing protein [Marinovum algicola]	1890	293482	58	22	33	12	6503	1	1	0	866.939	1731.86	2	1731.86	-0.0012	0	48.2	0.58	R	VSTISQGETGNEELIR	Y					Elution from: 46.257 to 46.257 period: 0 experiment: 1 cycles: 1 precIntensity: 27524.0 FinneganScanNumber: 3878 MStype: enumIsNormalMS rawFile: 16H146_5_120M.raw
1	gi|872560108	RHS repeat-associated core domain-containing protein [Marinovum algicola]	1890	293482	58	22	33	12	6504	1	1	0	866.94	1731.87	2	1731.86	0.0019	0	80.97	0.00033	R	VSTISQGETGNEELIR	Y					Elution from: 44.035 to 44.035 period: 0 experiment: 1 cycles: 1 precIntensity: 30371.0 FinneganScanNumber: 3643 MStype: enumIsNormalMS rawFile: 16H146_5_120M.raw
1	gi|872560108	RHS repeat-associated core domain-containing protein [Marinovum algicola]	1890	293482	58	22	33	12	6505	1	1	0	866.94	1731.87	2	1731.86	0.0022	0	96.06	9.1e-06	R	VSTISQGETGNEELIR	Y					Elution from: 43.990 to 43.990 period: 0 experiment: 1 cycles: 1 precIntensity: 24274.0 FinneganScanNumber: 3638 MStype: enumIsNormalMS rawFile: 16H146_5_120M.raw
1	gi|872560108	RHS repeat-associated core domain-containing protein [Marinovum algicola]	1890	293482	58	22	33	12	6523	1	1	1	870.895	1739.77	2	1739.78	-0.0002	0	76.07	0.00036	R	APNYIAFQDSDDASAR	S					Elution from: 50.920 to 50.920 period: 0 experiment: 1 cycles: 1 precIntensity: 43858.0 FinneganScanNumber: 4370 MStype: enumIsNormalMS rawFile: 16H146_5_120M.raw
1	gi|872560108	RHS repeat-associated core domain-containing protein [Marinovum algicola]	1890	293482	58	22	33	12	6524	1	1	1	870.895	1739.78	2	1739.78	0.0009	0	76.4	0.0003	R	APNYIAFQDSDDASAR	S					Elution from: 50.822 to 50.822 period: 0 experiment: 1 cycles: 1 precIntensity: 25945.0 FinneganScanNumber: 4358 MStype: enumIsNormalMS rawFile: 16H146_5_120M.raw
1	gi|872560108	RHS repeat-associated core domain-containing protein [Marinovum algicola]	1890	293482	58	22	33	12	6574	1	1	1	883.414	1764.81	2	1764.81	0.0004	0	113.24	1.1e-07	R	LAQVETSQSDEGTSASR	D					Elution from: 16.448 to 16.448 period: 0 experiment: 1 cycles: 1 precIntensity: 15595.0 FinneganScanNumber: 873 MStype: enumIsNormalMS rawFile: 16H146_5_120M.raw
1	gi|872560108	RHS repeat-associated core domain-containing protein [Marinovum algicola]	1890	293482	58	22	33	12	6747	1	1	0	906.485	1810.95	2	1810.95	0.0009	0	95.54	7.9e-06	R	ALSQQLTGLGPEASVANR	A					Elution from: 61.620 to 61.620 period: 0 experiment: 1 cycles: 1 precIntensity: 59808.0 FinneganScanNumber: 5521 MStype: enumIsNormalMS rawFile: 16H146_5_120M.raw
1	gi|872560108	RHS repeat-associated core domain-containing protein [Marinovum algicola]	1890	293482	58	22	33	12	6748	1	1	0	906.485	1810.96	2	1810.95	0.0016	0	99.23	3.4e-06	R	ALSQQLTGLGPEASVANR	A					Elution from: 61.642 to 61.642 period: 0 experiment: 1 cycles: 1 precIntensity: 77586.0 FinneganScanNumber: 5524 MStype: enumIsNormalMS rawFile: 16H146_5_120M.raw
1	gi|872560108	RHS repeat-associated core domain-containing protein [Marinovum algicola]	1890	293482	58	22	33	12	6826	1	1	0	919.41	1836.8	2	1836.81	-0.0008	0	41.02	0.88	R	SEYYYSNGVSPQDSLK	Y	Deamidated (NQ)	0.0000001000000000.0			Elution from: 51.220 to 51.220 period: 0 experiment: 1 cycles: 1 precIntensity: 20494.0 FinneganScanNumber: 4400 MStype: enumIsNormalMS rawFile: 16H146_5_120M.raw
1	gi|872560108	RHS repeat-associated core domain-containing protein [Marinovum algicola]	1890	293482	58	22	33	12	6827	1	1	0	919.411	1836.81	2	1836.81	0.0012	0	62.23	0.0065	R	SEYYYSNGVSPQDSLK	Y	Deamidated (NQ)	0.0000001000000000.0			Elution from: 51.270 to 51.270 period: 0 experiment: 1 cycles: 1 precIntensity: 44037.0 FinneganScanNumber: 4405 MStype: enumIsNormalMS rawFile: 16H146_5_120M.raw
1	gi|872560108	RHS repeat-associated core domain-containing protein [Marinovum algicola]	1890	293482	58	22	33	12	6828	1	1	0	919.411	1836.81	2	1836.81	0.0027	0	90.31	1.1e-05	R	SEYYYSNGVSPQDSLK	Y	Deamidated (NQ)	0.0000001000000000.0			Elution from: 51.317 to 51.317 period: 0 experiment: 1 cycles: 1 precIntensity: 52791.0 FinneganScanNumber: 4410 MStype: enumIsNormalMS rawFile: 16H146_5_120M.raw
1	gi|872560108	RHS repeat-associated core domain-containing protein [Marinovum algicola]	1890	293482	58	22	33	12	7013	1	1	0	943.969	1885.92	2	1885.92	0.0025	0	48.93	0.42	K	NAVVADFDYLPYGTVSR	S					Elution from: 91.575 to 91.575 period: 0 experiment: 1 cycles: 1 precIntensity: 12669.0 FinneganScanNumber: 8387 MStype: enumIsNormalMS rawFile: 16H146_5_120M.raw
1	gi|872560108	RHS repeat-associated core domain-containing protein [Marinovum algicola]	1890	293482	58	22	33	12	7368	1	1	0	1028.96	2055.9	2	2055.89	0.004	0	92.49	6.1e-06	K	AEGSTPDFDYSGGANAGWVR	E					Elution from: 69.203 to 69.203 period: 0 experiment: 1 cycles: 1 precIntensity: 44981.0 FinneganScanNumber: 6311 MStype: enumIsNormalMS rawFile: 16H146_5_120M.raw
1	gi|872560108	RHS repeat-associated core domain-containing protein [Marinovum algicola]	1890	293482	58	22	33	12	7369	1	1	0	1028.96	2055.9	2	2055.89	0.0043	0	85.91	2.8e-05	K	AEGSTPDFDYSGGANAGWVR	E					Elution from: 69.263 to 69.263 period: 0 experiment: 1 cycles: 1 precIntensity: 40879.0 FinneganScanNumber: 6316 MStype: enumIsNormalMS rawFile: 16H146_5_120M.raw
1	gi|872560108	RHS repeat-associated core domain-containing protein [Marinovum algicola]	1890	293482	58	22	33	12	7477	1	1	0	1064.01	2126	2	2126.01	-0.0042	0	74.9	0.00093	R	QTDYAFDAQGSPLAVQYPR	D					Elution from: 78.090 to 78.090 period: 0 experiment: 1 cycles: 1 precIntensity: 30958.0 FinneganScanNumber: 7177 MStype: enumIsNormalMS rawFile: 16H146_5_120M.raw
1	gi|872560108	RHS repeat-associated core domain-containing protein [Marinovum algicola]	1890	293482	58	22	33	12	7478	1	1	0	1064.01	2126.01	2	2126.01	-0.0007	0	92.69	1.7e-05	R	QTDYAFDAQGSPLAVQYPR	D					Elution from: 78.225 to 78.225 period: 0 experiment: 1 cycles: 1 precIntensity: 45640.0 FinneganScanNumber: 7189 MStype: enumIsNormalMS rawFile: 16H146_5_120M.raw
1	gi|872560108	RHS repeat-associated core domain-containing protein [Marinovum algicola]	1890	293482	58	22	33	12	7480	1	1	0	1064.01	2126.01	2	2126.01	0.0004	0	68.17	0.0047	R	QTDYAFDAQGSPLAVQYPR	D					Elution from: 105.033 to 105.033 period: 0 experiment: 1 cycles: 1 precIntensity: 22033.0 FinneganScanNumber: 9555 MStype: enumIsNormalMS rawFile: 16H146_5_120M.raw
2	gi|297182146	rhs family protein [uncultured Rhodobacterales bacterium HF4000_03E16]	1600	293383	51	19	29	10	1538	1	0	0	421.742	841.47	2	841.47	-0.0001	0	40.61	1.5	R	LWLPDAK	L					Elution from: 56.033 to 56.033 period: 0 experiment: 1 cycles: 1 precIntensity: 64583.0 FinneganScanNumber: 4925 MStype: enumIsNormalMS rawFile: 16H146_5_120M.raw
2	gi|297182146	rhs family protein [uncultured Rhodobacterales bacterium HF4000_03E16]	1600	293383	51	19	29	10	1833	1	0	0	456.24	910.465	2	910.466	-0.0008	0	44.2	0.56	R	FYGAQIGR	F					Elution from: 32.925 to 32.925 period: 0 experiment: 1 cycles: 1 precIntensity: 56358.0 FinneganScanNumber: 2482 MStype: enumIsNormalMS rawFile: 16H146_5_120M.raw
2	gi|297182146	rhs family protein [uncultured Rhodobacterales bacterium HF4000_03E16]	1600	293383	51	19	29	10	2036	2	0	1	474.243	946.472	2	946.472	-0.0003	0	31.27	25	K	LEANGVTSR	S	Deamidated (NQ)	0.000100000.0			Elution from: 13.617 to 13.617 period: 0 experiment: 1 cycles: 1 precIntensity: 13698.0 FinneganScanNumber: 627 MStype: enumIsNormalMS rawFile: 16H146_5_120M.raw
2	gi|297182146	rhs family protein [uncultured Rhodobacterales bacterium HF4000_03E16]	1600	293383	51	19	29	10	2037	3	0	1	474.243	946.472	2	946.472	0	0	26.78	77	K	LEANGVTSR	S	Deamidated (NQ)	0.000100000.0			Elution from: 14.208 to 14.208 period: 0 experiment: 1 cycles: 1 precIntensity: 15454.0 FinneganScanNumber: 676 MStype: enumIsNormalMS rawFile: 16H146_5_120M.raw
2	gi|297182146	rhs family protein [uncultured Rhodobacterales bacterium HF4000_03E16]	1600	293383	51	19	29	10	2462	3	0	0	509.24	1016.47	2	1016.47	-0.0012	0	39.51	1.1	K	DWSAGAAPSR	L					Elution from: 20.540 to 20.540 period: 0 experiment: 1 cycles: 1 precIntensity: 32359.0 FinneganScanNumber: 1260 MStype: enumIsNormalMS rawFile: 16H146_5_120M.raw
2	gi|297182146	rhs family protein [uncultured Rhodobacterales bacterium HF4000_03E16]	1600	293383	51	19	29	10	2463	1	0	0	509.24	1016.47	2	1016.47	-0.0011	0	41.09	0.76	K	DWSAGAAPSR	L					Elution from: 20.580 to 20.580 period: 0 experiment: 1 cycles: 1 precIntensity: 58182.0 FinneganScanNumber: 1264 MStype: enumIsNormalMS rawFile: 16H146_5_120M.raw
2	gi|297182146	rhs family protein [uncultured Rhodobacterales bacterium HF4000_03E16]	1600	293383	51	19	29	10	2470	1	0	0	510.266	1018.52	2	1018.52	-0.0022	0	25.33	50	R	VEVFNAQGR	Q					Elution from: 26.995 to 26.995 period: 0 experiment: 1 cycles: 1 precIntensity: 23810.0 FinneganScanNumber: 1886 MStype: enumIsNormalMS rawFile: 16H146_5_120M.raw
2	gi|297182146	rhs family protein [uncultured Rhodobacterales bacterium HF4000_03E16]	1600	293383	51	19	29	10	2471	1	0	0	510.267	1018.52	2	1018.52	0	0	32.37	18	R	VEVFNAQGR	Q					Elution from: 26.845 to 26.845 period: 0 experiment: 1 cycles: 1 precIntensity: 36496.0 FinneganScanNumber: 1872 MStype: enumIsNormalMS rawFile: 16H146_5_120M.raw
2	gi|297182146	rhs family protein [uncultured Rhodobacterales bacterium HF4000_03E16]	1600	293383	51	19	29	10	2871	1	0	0	552.788	1103.56	2	1103.56	-0.0002	0	33.84	15	R	EVFEASPLGR	T					Elution from: 46.403 to 46.403 period: 0 experiment: 1 cycles: 1 precIntensity: 67520.0 FinneganScanNumber: 3894 MStype: enumIsNormalMS rawFile: 16H146_5_120M.raw
2	gi|297182146	rhs family protein [uncultured Rhodobacterales bacterium HF4000_03E16]	1600	293383	51	19	29	10	2872	2	0	0	552.788	1103.56	2	1103.56	0.0006	0	21.63	240	R	EVFEASPLGR	T					Elution from: 48.925 to 48.925 period: 0 experiment: 1 cycles: 1 precIntensity: 20123.0 FinneganScanNumber: 4158 MStype: enumIsNormalMS rawFile: 16H146_5_120M.raw
2	gi|297182146	rhs family protein [uncultured Rhodobacterales bacterium HF4000_03E16]	1600	293383	51	19	29	10	2873	1	0	0	552.788	1103.56	2	1103.56	0.0006	0	29.8	37	R	EVFEASPLGR	T					Elution from: 46.340 to 46.340 period: 0 experiment: 1 cycles: 1 precIntensity: 98968.0 FinneganScanNumber: 3887 MStype: enumIsNormalMS rawFile: 16H146_5_120M.raw
2	gi|297182146	rhs family protein [uncultured Rhodobacterales bacterium HF4000_03E16]	1600	293383	51	19	29	10	2999	1	1	1	564.799	1127.58	2	1127.58	0	0	68.63	0.0025	R	GAANAVQWGVR	W					Elution from: 41.228 to 41.228 period: 0 experiment: 1 cycles: 1 precIntensity: 78315.0 FinneganScanNumber: 3335 MStype: enumIsNormalMS rawFile: 16H146_5_120M.raw
2	gi|297182146	rhs family protein [uncultured Rhodobacterales bacterium HF4000_03E16]	1600	293383	51	19	29	10	3119	1	0	0	576.314	1150.61	2	1150.61	-0.0004	0	32.96	9.8	R	YLVASFPGAAR	S					Elution from: 58.683 to 58.683 period: 0 experiment: 1 cycles: 1 precIntensity: 111958.0 FinneganScanNumber: 5203 MStype: enumIsNormalMS rawFile: 16H146_5_120M.raw
2	gi|297182146	rhs family protein [uncultured Rhodobacterales bacterium HF4000_03E16]	1600	293383	51	19	29	10	3486	2	0	0	604.831	1207.65	2	1207.64	0.0022	0	30.05	21	K	ATQTVVEYGIK	A					Elution from: 37.593 to 37.593 period: 0 experiment: 1 cycles: 1 precIntensity: 36454.0 FinneganScanNumber: 2957 MStype: enumIsNormalMS rawFile: 16H146_5_120M.raw
2	gi|297182146	rhs family protein [uncultured Rhodobacterales bacterium HF4000_03E16]	1600	293383	51	19	29	10	3597	1	0	0	615.331	1228.65	2	1228.65	-0.0005	0	42.6	1.5	R	VMTLALPEEAR	A					Elution from: 65.338 to 65.338 period: 0 experiment: 1 cycles: 1 precIntensity: 44287.0 FinneganScanNumber: 5913 MStype: enumIsNormalMS rawFile: 16H146_5_120M.raw
2	gi|297182146	rhs family protein [uncultured Rhodobacterales bacterium HF4000_03E16]	1600	293383	51	19	29	10	3857	2	0	0	634.289	1266.56	2	1266.57	-0.002	0	23.87	58	R	LDWTSGQMTGR	V	Oxidation (M)	0.00000002000.0			Elution from: 29.943 to 29.943 period: 0 experiment: 1 cycles: 1 precIntensity: 23218.0 FinneganScanNumber: 2178 MStype: enumIsNormalMS rawFile: 16H146_5_120M.raw
2	gi|297182146	rhs family protein [uncultured Rhodobacterales bacterium HF4000_03E16]	1600	293383	51	19	29	10	4071	2	0	0	643.852	1285.69	2	1285.69	0.0027	0	27.59	51	K	SLLIEEQIDAR	G					Elution from: 112.242 to 112.242 period: 0 experiment: 1 cycles: 1 precIntensity: 62680.0 FinneganScanNumber: 10260 MStype: enumIsNormalMS rawFile: 16H146_5_120M.raw
2	gi|297182146	rhs family protein [uncultured Rhodobacterales bacterium HF4000_03E16]	1600	293383	51	19	29	10	5157	1	0	0	706.839	1411.66	2	1411.66	0.0007	0	54.61	0.068	R	SFEFNDAAVGDIK	T					Elution from: 105.702 to 105.702 period: 0 experiment: 1 cycles: 1 precIntensity: 43862.0 FinneganScanNumber: 9614 MStype: enumIsNormalMS rawFile: 16H146_5_120M.raw
2	gi|297182146	rhs family protein [uncultured Rhodobacterales bacterium HF4000_03E16]	1600	293383	51	19	29	10	5158	1	0	0	706.857	1411.7	2	1411.7	0.0003	0	22.38	150	K	ITYPGGAEASVGYK	E					Elution from: 44.243 to 44.243 period: 0 experiment: 1 cycles: 1 precIntensity: 67050.0 FinneganScanNumber: 3664 MStype: enumIsNormalMS rawFile: 16H146_5_120M.raw
2	gi|297182146	rhs family protein [uncultured Rhodobacterales bacterium HF4000_03E16]	1600	293383	51	19	29	10	5195	1	0	0	709.869	1417.72	2	1417.72	-0.0016	0	39.12	3.9	K	SLVFAHEVPEYK	V					Elution from: 60.733 to 60.733 period: 0 experiment: 1 cycles: 1 precIntensity: 33134.0 FinneganScanNumber: 5422 MStype: enumIsNormalMS rawFile: 16H146_5_120M.raw
2	gi|297182146	rhs family protein [uncultured Rhodobacterales bacterium HF4000_03E16]	1600	293383	51	19	29	10	5309	1	0	0	720.35	1438.68	2	1438.69	-0.0029	0	63.6	0.011	R	MTVSQFLADSQGR	L					Elution from: 80.765 to 80.765 period: 0 experiment: 1 cycles: 1 precIntensity: 27447.0 FinneganScanNumber: 7422 MStype: enumIsNormalMS rawFile: 16H146_5_120M.raw
2	gi|297182146	rhs family protein [uncultured Rhodobacterales bacterium HF4000_03E16]	1600	293383	51	19	29	10	5310	1	0	0	720.352	1438.69	2	1438.69	0.0019	0	98.12	4e-06	R	MTVSQFLADSQGR	L					Elution from: 80.797 to 80.797 period: 0 experiment: 1 cycles: 1 precIntensity: 24056.0 FinneganScanNumber: 7425 MStype: enumIsNormalMS rawFile: 16H146_5_120M.raw
2	gi|297182146	rhs family protein [uncultured Rhodobacterales bacterium HF4000_03E16]	1600	293383	51	19	29	10	5401	1	0	0	732.366	1462.72	2	1462.72	-0.0009	0	45.08	0.93	R	YVLTPLDDAEEAK	V					Elution from: 61.800 to 61.800 period: 0 experiment: 1 cycles: 1 precIntensity: 239400.0 FinneganScanNumber: 5541 MStype: enumIsNormalMS rawFile: 16H146_5_120M.raw
2	gi|297182146	rhs family protein [uncultured Rhodobacterales bacterium HF4000_03E16]	1600	293383	51	19	29	10	5522	1	0	0	744.867	1487.72	2	1487.72	-0.0016	0	27.22	48	R	IVVETSGNGSPASDR	H					Elution from: 20.752 to 20.752 period: 0 experiment: 1 cycles: 1 precIntensity: 27298.0 FinneganScanNumber: 1281 MStype: enumIsNormalMS rawFile: 16H146_5_120M.raw
2	gi|297182146	rhs family protein [uncultured Rhodobacterales bacterium HF4000_03E16]	1600	293383	51	19	29	10	5526	1	0	0	745.362	1488.71	2	1488.71	0.0038	0	76.4	0.0006	R	IVVETSGNGSPASDR	H	Deamidated (NQ)	0.000000010000000.0			Elution from: 20.817 to 20.817 period: 0 experiment: 1 cycles: 1 precIntensity: 37567.0 FinneganScanNumber: 1287 MStype: enumIsNormalMS rawFile: 16H146_5_120M.raw
2	gi|297182146	rhs family protein [uncultured Rhodobacterales bacterium HF4000_03E16]	1600	293383	51	19	29	10	5896	1	0	0	788.427	1574.84	2	1574.84	-0.0021	0	33.21	15	R	NGDIGPVQVLPGGPQK	V					Elution from: 55.582 to 55.582 period: 0 experiment: 1 cycles: 1 precIntensity: 41609.0 FinneganScanNumber: 4876 MStype: enumIsNormalMS rawFile: 16H146_5_120M.raw
2	gi|297182146	rhs family protein [uncultured Rhodobacterales bacterium HF4000_03E16]	1600	293383	51	19	29	10	5897	1	0	0	788.427	1574.84	2	1574.84	-0.002	0	43.01	1.5	R	NGDIGPVQVLPGGPQK	V					Elution from: 55.645 to 55.645 period: 0 experiment: 1 cycles: 1 precIntensity: 55077.0 FinneganScanNumber: 4883 MStype: enumIsNormalMS rawFile: 16H146_5_120M.raw
2	gi|297182146	rhs family protein [uncultured Rhodobacterales bacterium HF4000_03E16]	1600	293383	51	19	29	10	6031	1	0	0	801.873	1601.73	2	1601.73	0	0	53.94	0.078	R	TGSSQFVYSDAGDLR	F					Elution from: 53.752 to 53.752 period: 0 experiment: 1 cycles: 1 precIntensity: 48604.0 FinneganScanNumber: 4674 MStype: enumIsNormalMS rawFile: 16H146_5_120M.raw
2	gi|297182146	rhs family protein [uncultured Rhodobacterales bacterium HF4000_03E16]	1600	293383	51	19	29	10	6032	1	0	0	801.874	1601.73	2	1601.73	0.0007	0	50.03	0.19	R	TGSSQFVYSDAGDLR	F					Elution from: 53.823 to 53.823 period: 0 experiment: 1 cycles: 1 precIntensity: 39706.0 FinneganScanNumber: 4682 MStype: enumIsNormalMS rawFile: 16H146_5_120M.raw
2	gi|297182146	rhs family protein [uncultured Rhodobacterales bacterium HF4000_03E16]	1600	293383	51	19	29	10	6155	1	0	0	814.371	1626.73	2	1626.73	-0.0041	0	28.77	20	R	VAEAYPDDGGFPYAR	E					Elution from: 56.912 to 56.912 period: 0 experiment: 1 cycles: 1 precIntensity: 37059.0 FinneganScanNumber: 5015 MStype: enumIsNormalMS rawFile: 16H146_5_120M.raw
2	gi|297182146	rhs family protein [uncultured Rhodobacterales bacterium HF4000_03E16]	1600	293383	51	19	29	10	6156	1	0	0	814.374	1626.73	2	1626.73	0.0017	0	38.29	2	R	VAEAYPDDGGFPYAR	E					Elution from: 56.972 to 56.972 period: 0 experiment: 1 cycles: 1 precIntensity: 56057.0 FinneganScanNumber: 5021 MStype: enumIsNormalMS rawFile: 16H146_5_120M.raw
2	gi|297182146	rhs family protein [uncultured Rhodobacterales bacterium HF4000_03E16]	1600	293383	51	19	29	10	6238	1	0	0	824.451	1646.89	2	1646.89	-0.0016	0	37.21	4.3	R	TGLAQYPEVSVVTGVK	T					Elution from: 73.693 to 73.693 period: 0 experiment: 1 cycles: 1 precIntensity: 35957.0 FinneganScanNumber: 6757 MStype: enumIsNormalMS rawFile: 16H146_5_120M.raw
2	gi|297182146	rhs family protein [uncultured Rhodobacterales bacterium HF4000_03E16]	1600	293383	51	19	29	10	6239	1	0	0	824.451	1646.89	2	1646.89	-0.0016	0	44.8	0.75	R	TGLAQYPEVSVVTGVK	T					Elution from: 104.122 to 104.122 period: 0 experiment: 1 cycles: 1 precIntensity: 12270.0 FinneganScanNumber: 9475 MStype: enumIsNormalMS rawFile: 16H146_5_120M.raw
2	gi|297182146	rhs family protein [uncultured Rhodobacterales bacterium HF4000_03E16]	1600	293383	51	19	29	10	6240	1	0	0	824.451	1646.89	2	1646.89	-0.0011	0	84.75	7.5e-05	R	TGLAQYPEVSVVTGVK	T					Elution from: 106.260 to 106.260 period: 0 experiment: 1 cycles: 1 precIntensity: 73979.0 FinneganScanNumber: 9665 MStype: enumIsNormalMS rawFile: 16H146_5_120M.raw
2	gi|297182146	rhs family protein [uncultured Rhodobacterales bacterium HF4000_03E16]	1600	293383	51	19	29	10	6241	1	0	0	824.451	1646.89	2	1646.89	-0.001	0	71.77	0.0015	R	TGLAQYPEVSVVTGVK	T					Elution from: 106.190 to 106.190 period: 0 experiment: 1 cycles: 1 precIntensity: 74324.0 FinneganScanNumber: 9659 MStype: enumIsNormalMS rawFile: 16H146_5_120M.raw
2	gi|297182146	rhs family protein [uncultured Rhodobacterales bacterium HF4000_03E16]	1600	293383	51	19	29	10	6259	1	0	0	826.442	1650.87	2	1650.87	0.0013	0	63.75	0.011	K	VSVPADAAGPGSNLAGLR	F					Elution from: 59.542 to 59.542 period: 0 experiment: 1 cycles: 1 precIntensity: 101260.0 FinneganScanNumber: 5293 MStype: enumIsNormalMS rawFile: 16H146_5_120M.raw
2	gi|297182146	rhs family protein [uncultured Rhodobacterales bacterium HF4000_03E16]	1600	293383	51	19	29	10	6260	1	0	0	826.443	1650.87	2	1650.87	0.0026	0	75.18	0.00073	K	VSVPADAAGPGSNLAGLR	F					Elution from: 59.477 to 59.477 period: 0 experiment: 1 cycles: 1 precIntensity: 48184.0 FinneganScanNumber: 5287 MStype: enumIsNormalMS rawFile: 16H146_5_120M.raw
2	gi|297182146	rhs family protein [uncultured Rhodobacterales bacterium HF4000_03E16]	1600	293383	51	19	29	10	6503	1	0	0	866.939	1731.86	2	1731.86	-0.0012	0	48.2	0.58	R	VSTISQGETGNEELIR	Y					Elution from: 46.257 to 46.257 period: 0 experiment: 1 cycles: 1 precIntensity: 27524.0 FinneganScanNumber: 3878 MStype: enumIsNormalMS rawFile: 16H146_5_120M.raw
2	gi|297182146	rhs family protein [uncultured Rhodobacterales bacterium HF4000_03E16]	1600	293383	51	19	29	10	6504	1	0	0	866.94	1731.87	2	1731.86	0.0019	0	80.97	0.00033	R	VSTISQGETGNEELIR	Y					Elution from: 44.035 to 44.035 period: 0 experiment: 1 cycles: 1 precIntensity: 30371.0 FinneganScanNumber: 3643 MStype: enumIsNormalMS rawFile: 16H146_5_120M.raw
2	gi|297182146	rhs family protein [uncultured Rhodobacterales bacterium HF4000_03E16]	1600	293383	51	19	29	10	6505	1	0	0	866.94	1731.87	2	1731.86	0.0022	0	96.06	9.1e-06	R	VSTISQGETGNEELIR	Y					Elution from: 43.990 to 43.990 period: 0 experiment: 1 cycles: 1 precIntensity: 24274.0 FinneganScanNumber: 3638 MStype: enumIsNormalMS rawFile: 16H146_5_120M.raw
2	gi|297182146	rhs family protein [uncultured Rhodobacterales bacterium HF4000_03E16]	1600	293383	51	19	29	10	6747	1	0	0	906.485	1810.95	2	1810.95	0.0009	0	95.54	7.9e-06	R	ALSQQLTGLGPEASVANR	A					Elution from: 61.620 to 61.620 period: 0 experiment: 1 cycles: 1 precIntensity: 59808.0 FinneganScanNumber: 5521 MStype: enumIsNormalMS rawFile: 16H146_5_120M.raw
2	gi|297182146	rhs family protein [uncultured Rhodobacterales bacterium HF4000_03E16]	1600	293383	51	19	29	10	6748	1	0	0	906.485	1810.96	2	1810.95	0.0016	0	99.23	3.4e-06	R	ALSQQLTGLGPEASVANR	A					Elution from: 61.642 to 61.642 period: 0 experiment: 1 cycles: 1 precIntensity: 77586.0 FinneganScanNumber: 5524 MStype: enumIsNormalMS rawFile: 16H146_5_120M.raw
2	gi|297182146	rhs family protein [uncultured Rhodobacterales bacterium HF4000_03E16]	1600	293383	51	19	29	10	6826	1	0	0	919.41	1836.8	2	1836.81	-0.0008	0	41.02	0.88	R	SEYYYSNGVSPQDSLK	Y	Deamidated (NQ)	0.0000001000000000.0			Elution from: 51.220 to 51.220 period: 0 experiment: 1 cycles: 1 precIntensity: 20494.0 FinneganScanNumber: 4400 MStype: enumIsNormalMS rawFile: 16H146_5_120M.raw
2	gi|297182146	rhs family protein [uncultured Rhodobacterales bacterium HF4000_03E16]	1600	293383	51	19	29	10	6827	1	0	0	919.411	1836.81	2	1836.81	0.0012	0	62.23	0.0065	R	SEYYYSNGVSPQDSLK	Y	Deamidated (NQ)	0.0000001000000000.0			Elution from: 51.270 to 51.270 period: 0 experiment: 1 cycles: 1 precIntensity: 44037.0 FinneganScanNumber: 4405 MStype: enumIsNormalMS rawFile: 16H146_5_120M.raw
2	gi|297182146	rhs family protein [uncultured Rhodobacterales bacterium HF4000_03E16]	1600	293383	51	19	29	10	6828	1	0	0	919.411	1836.81	2	1836.81	0.0027	0	90.31	1.1e-05	R	SEYYYSNGVSPQDSLK	Y	Deamidated (NQ)	0.0000001000000000.0			Elution from: 51.317 to 51.317 period: 0 experiment: 1 cycles: 1 precIntensity: 52791.0 FinneganScanNumber: 4410 MStype: enumIsNormalMS rawFile: 16H146_5_120M.raw
2	gi|297182146	rhs family protein [uncultured Rhodobacterales bacterium HF4000_03E16]	1600	293383	51	19	29	10	7013	1	0	0	943.969	1885.92	2	1885.92	0.0025	0	48.93	0.42	K	NAVVADFDYLPYGTVSR	S					Elution from: 91.575 to 91.575 period: 0 experiment: 1 cycles: 1 precIntensity: 12669.0 FinneganScanNumber: 8387 MStype: enumIsNormalMS rawFile: 16H146_5_120M.raw
2	gi|297182146	rhs family protein [uncultured Rhodobacterales bacterium HF4000_03E16]	1600	293383	51	19	29	10	7368	1	0	0	1028.96	2055.9	2	2055.89	0.004	0	92.49	6.1e-06	K	AEGSTPDFDYSGGANAGWVR	E					Elution from: 69.203 to 69.203 period: 0 experiment: 1 cycles: 1 precIntensity: 44981.0 FinneganScanNumber: 6311 MStype: enumIsNormalMS rawFile: 16H146_5_120M.raw
2	gi|297182146	rhs family protein [uncultured Rhodobacterales bacterium HF4000_03E16]	1600	293383	51	19	29	10	7369	1	0	0	1028.96	2055.9	2	2055.89	0.0043	0	85.91	2.8e-05	K	AEGSTPDFDYSGGANAGWVR	E					Elution from: 69.263 to 69.263 period: 0 experiment: 1 cycles: 1 precIntensity: 40879.0 FinneganScanNumber: 6316 MStype: enumIsNormalMS rawFile: 16H146_5_120M.raw
2	gi|297182146	rhs family protein [uncultured Rhodobacterales bacterium HF4000_03E16]	1600	293383	51	19	29	10	7477	1	0	0	1064.01	2126	2	2126.01	-0.0042	0	74.9	0.00093	R	QTDYAFDAQGSPLAVQYPR	D					Elution from: 78.090 to 78.090 period: 0 experiment: 1 cycles: 1 precIntensity: 30958.0 FinneganScanNumber: 7177 MStype: enumIsNormalMS rawFile: 16H146_5_120M.raw
2	gi|297182146	rhs family protein [uncultured Rhodobacterales bacterium HF4000_03E16]	1600	293383	51	19	29	10	7478	1	0	0	1064.01	2126.01	2	2126.01	-0.0007	0	92.69	1.7e-05	R	QTDYAFDAQGSPLAVQYPR	D					Elution from: 78.225 to 78.225 period: 0 experiment: 1 cycles: 1 precIntensity: 45640.0 FinneganScanNumber: 7189 MStype: enumIsNormalMS rawFile: 16H146_5_120M.raw
2	gi|297182146	rhs family protein [uncultured Rhodobacterales bacterium HF4000_03E16]	1600	293383	51	19	29	10	7480	1	0	0	1064.01	2126.01	2	2126.01	0.0004	0	68.17	0.0047	R	QTDYAFDAQGSPLAVQYPR	D					Elution from: 105.033 to 105.033 period: 0 experiment: 1 cycles: 1 precIntensity: 22033.0 FinneganScanNumber: 9555 MStype: enumIsNormalMS rawFile: 16H146_5_120M.raw
3	gi|868875344	Uncharacterized protein MALG_00714 [Marinovum algicola DG 898]	681	96911	29	19	9	9	2860	1	1	1	552.282	1102.55	2	1102.55	-0.0032	0	30.58	26	R	ANPSGFGVAGAR	I					Elution from: 28.907 to 28.907 period: 0 experiment: 1 cycles: 1 precIntensity: 78884.0 FinneganScanNumber: 2075 MStype: enumIsNormalMS rawFile: 16H146_5_120M.raw
3	gi|868875344	Uncharacterized protein MALG_00714 [Marinovum algicola DG 898]	681	96911	29	19	9	9	2861	1	1	1	552.283	1102.55	2	1102.55	-0.0007	0	33.9	12	R	ANPSGFGVAGAR	I					Elution from: 28.853 to 28.853 period: 0 experiment: 1 cycles: 1 precIntensity: 67589.0 FinneganScanNumber: 2069 MStype: enumIsNormalMS rawFile: 16H146_5_120M.raw
3	gi|868875344	Uncharacterized protein MALG_00714 [Marinovum algicola DG 898]	681	96911	29	19	9	9	2862	1	1	1	552.283	1102.55	2	1102.55	0.0001	0	59.4	0.033	R	ANPSGFGVAGAR	I					Elution from: 26.840 to 26.840 period: 0 experiment: 1 cycles: 1 precIntensity: 695234.0 FinneganScanNumber: 1871 MStype: enumIsNormalMS rawFile: 16H146_5_120M.raw
3	gi|868875344	Uncharacterized protein MALG_00714 [Marinovum algicola DG 898]	681	96911	29	19	9	9	2863	1	1	1	552.284	1102.55	2	1102.55	0.0009	0	42.66	1.6	R	ANPSGFGVAGAR	I					Elution from: 26.782 to 26.782 period: 0 experiment: 1 cycles: 1 precIntensity: 691563.0 FinneganScanNumber: 1865 MStype: enumIsNormalMS rawFile: 16H146_5_120M.raw
3	gi|868875344	Uncharacterized protein MALG_00714 [Marinovum algicola DG 898]	681	96911	29	19	9	9	4653	1	1	1	676.335	1350.65	2	1350.66	-0.0023	0	92.67	1.5e-05	R	VFGENGWATLTR	D	Deamidated (NQ)	0.000010000000.0			Elution from: 77.348 to 77.348 period: 0 experiment: 1 cycles: 1 precIntensity: 90429.0 FinneganScanNumber: 7110 MStype: enumIsNormalMS rawFile: 16H146_5_120M.raw
3	gi|868875344	Uncharacterized protein MALG_00714 [Marinovum algicola DG 898]	681	96911	29	19	9	9	4654	1	1	1	676.335	1350.66	2	1350.66	-0.0016	0	90.32	2.6e-05	R	VFGENGWATLTR	D	Deamidated (NQ)	0.000010000000.0			Elution from: 77.287 to 77.287 period: 0 experiment: 1 cycles: 1 precIntensity: 108992.0 FinneganScanNumber: 7104 MStype: enumIsNormalMS rawFile: 16H146_5_120M.raw
3	gi|868875344	Uncharacterized protein MALG_00714 [Marinovum algicola DG 898]	681	96911	29	19	9	9	5254	1	1	1	714.897	1427.78	2	1427.78	-0.0004	0	61.83	0.023	R	VTSLALDMQPVVR	V					Elution from: 72.407 to 72.407 period: 0 experiment: 1 cycles: 1 precIntensity: 54700.0 FinneganScanNumber: 6630 MStype: enumIsNormalMS rawFile: 16H146_5_120M.raw
3	gi|868875344	Uncharacterized protein MALG_00714 [Marinovum algicola DG 898]	681	96911	29	19	9	9	5256	1	1	1	714.898	1427.78	2	1427.78	-0.0002	0	26.93	46	R	VTSLALDMQPVVR	V					Elution from: 114.488 to 114.488 period: 0 experiment: 1 cycles: 1 precIntensity: 66170.0 FinneganScanNumber: 10495 MStype: enumIsNormalMS rawFile: 16H146_5_120M.raw
3	gi|868875344	Uncharacterized protein MALG_00714 [Marinovum algicola DG 898]	681	96911	29	19	9	9	5535	1	1	1	745.828	1489.64	2	1489.64	-0.0011	0	63.78	0.0029	R	DGDQANNTDVQWK	E					Elution from: 25.665 to 25.665 period: 0 experiment: 1 cycles: 1 precIntensity: 83041.0 FinneganScanNumber: 1756 MStype: enumIsNormalMS rawFile: 16H146_5_120M.raw
3	gi|868875344	Uncharacterized protein MALG_00714 [Marinovum algicola DG 898]	681	96911	29	19	9	9	5536	1	1	1	745.829	1489.64	2	1489.64	-0.0004	0	27.78	11	R	DGDQANNTDVQWK	E					Elution from: 27.937 to 27.937 period: 0 experiment: 1 cycles: 1 precIntensity: 11579.0 FinneganScanNumber: 1979 MStype: enumIsNormalMS rawFile: 16H146_5_120M.raw
3	gi|868875344	Uncharacterized protein MALG_00714 [Marinovum algicola DG 898]	681	96911	29	19	9	9	6459	1	1	1	859.868	1717.72	2	1717.72	-0.0008	0	66.47	0.0011	K	ENCTDSDPTTTAPGPR	A					Elution from: 16.008 to 16.008 period: 0 experiment: 1 cycles: 1 precIntensity: 65259.0 FinneganScanNumber: 835 MStype: enumIsNormalMS rawFile: 16H146_5_120M.raw
3	gi|868875344	Uncharacterized protein MALG_00714 [Marinovum algicola DG 898]	681	96911	29	19	9	9	6460	1	1	1	859.869	1717.72	2	1717.72	0.0018	0	93.76	2e-06	K	ENCTDSDPTTTAPGPR	A					Elution from: 15.962 to 15.962 period: 0 experiment: 1 cycles: 1 precIntensity: 13425.0 FinneganScanNumber: 831 MStype: enumIsNormalMS rawFile: 16H146_5_120M.raw
3	gi|868875344	Uncharacterized protein MALG_00714 [Marinovum algicola DG 898]	681	96911	29	19	9	9	7276	1	1	1	1005.55	2009.09	2	2009.09	-0.0018	0	60.96	0.017	K	TAASLLVGQLTPGENAVGVGR	F					Elution from: 84.440 to 84.440 period: 0 experiment: 1 cycles: 1 precIntensity: 61037.0 FinneganScanNumber: 7754 MStype: enumIsNormalMS rawFile: 16H146_5_120M.raw
3	gi|868875344	Uncharacterized protein MALG_00714 [Marinovum algicola DG 898]	681	96911	29	19	9	9	7278	1	1	1	1005.55	2009.09	2	2009.09	-0.0015	0	62.91	0.011	K	TAASLLVGQLTPGENAVGVGR	F					Elution from: 84.382 to 84.382 period: 0 experiment: 1 cycles: 1 precIntensity: 16581.0 FinneganScanNumber: 7749 MStype: enumIsNormalMS rawFile: 16H146_5_120M.raw
3	gi|868875344	Uncharacterized protein MALG_00714 [Marinovum algicola DG 898]	681	96911	29	19	9	9	8004	1	1	1	868.436	2602.29	3	2602.29	-0.0006	0	25.5	120	R	TQYTNLVAPTAPNLIVNDDESTAR	S					Elution from: 79.952 to 79.952 period: 0 experiment: 1 cycles: 1 precIntensity: 53791.0 FinneganScanNumber: 7347 MStype: enumIsNormalMS rawFile: 16H146_5_120M.raw
3	gi|868875344	Uncharacterized protein MALG_00714 [Marinovum algicola DG 898]	681	96911	29	19	9	9	8005	1	1	1	868.436	2602.29	3	2602.29	-0.0006	0	28.49	59	R	TQYTNLVAPTAPNLIVNDDESTAR	S					Elution from: 106.737 to 106.737 period: 0 experiment: 1 cycles: 1 precIntensity: 54180.0 FinneganScanNumber: 9709 MStype: enumIsNormalMS rawFile: 16H146_5_120M.raw
3	gi|868875344	Uncharacterized protein MALG_00714 [Marinovum algicola DG 898]	681	96911	29	19	9	9	8006	1	1	1	868.436	2602.29	3	2602.29	-0.0004	0	48.08	0.65	R	TQYTNLVAPTAPNLIVNDDESTAR	S					Elution from: 104.572 to 104.572 period: 0 experiment: 1 cycles: 1 precIntensity: 361527.0 FinneganScanNumber: 9516 MStype: enumIsNormalMS rawFile: 16H146_5_120M.raw
3	gi|868875344	Uncharacterized protein MALG_00714 [Marinovum algicola DG 898]	681	96911	29	19	9	9	8007	1	1	1	868.437	2602.29	3	2602.29	0.0004	0	60.06	0.041	R	TQYTNLVAPTAPNLIVNDDESTAR	S					Elution from: 104.637 to 104.637 period: 0 experiment: 1 cycles: 1 precIntensity: 337359.0 FinneganScanNumber: 9522 MStype: enumIsNormalMS rawFile: 16H146_5_120M.raw
3	gi|868875344	Uncharacterized protein MALG_00714 [Marinovum algicola DG 898]	681	96911	29	19	9	9	8008	1	1	1	1302.15	2602.29	2	2602.29	0.0018	0	68.43	0.0061	R	TQYTNLVAPTAPNLIVNDDESTAR	S					Elution from: 80.057 to 80.057 period: 0 experiment: 1 cycles: 1 precIntensity: 28445.0 FinneganScanNumber: 7356 MStype: enumIsNormalMS rawFile: 16H146_5_120M.raw
3	gi|868875344	Uncharacterized protein MALG_00714 [Marinovum algicola DG 898]	681	96911	29	19	9	9	8009	1	1	1	1302.15	2602.29	2	2602.29	0.002	0	69.05	0.0052	R	TQYTNLVAPTAPNLIVNDDESTAR	S					Elution from: 105.055 to 105.055 period: 0 experiment: 1 cycles: 1 precIntensity: 51785.0 FinneganScanNumber: 9557 MStype: enumIsNormalMS rawFile: 16H146_5_120M.raw
3	gi|868875344	Uncharacterized protein MALG_00714 [Marinovum algicola DG 898]	681	96911	29	19	9	9	8010	1	1	1	1302.15	2602.29	2	2602.29	0.0021	0	70.31	0.0039	R	TQYTNLVAPTAPNLIVNDDESTAR	S					Elution from: 80.138 to 80.138 period: 0 experiment: 1 cycles: 1 precIntensity: 117786.0 FinneganScanNumber: 7364 MStype: enumIsNormalMS rawFile: 16H146_5_120M.raw
3	gi|868875344	Uncharacterized protein MALG_00714 [Marinovum algicola DG 898]	681	96911	29	19	9	9	8011	1	1	1	1302.15	2602.29	2	2602.29	0.0022	0	70.65	0.0036	R	TQYTNLVAPTAPNLIVNDDESTAR	S					Elution from: 104.983 to 104.983 period: 0 experiment: 1 cycles: 1 precIntensity: 76682.0 FinneganScanNumber: 9551 MStype: enumIsNormalMS rawFile: 16H146_5_120M.raw
3	gi|868875344	Uncharacterized protein MALG_00714 [Marinovum algicola DG 898]	681	96911	29	19	9	9	8012	1	1	1	1302.15	2602.29	2	2602.29	0.0025	0	74.88	0.0014	R	TQYTNLVAPTAPNLIVNDDESTAR	S					Elution from: 80.085 to 80.085 period: 0 experiment: 1 cycles: 1 precIntensity: 67472.0 FinneganScanNumber: 7359 MStype: enumIsNormalMS rawFile: 16H146_5_120M.raw
3	gi|868875344	Uncharacterized protein MALG_00714 [Marinovum algicola DG 898]	681	96911	29	19	9	9	8013	1	1	1	868.437	2602.29	3	2602.29	0.0028	0	36.26	10	R	TQYTNLVAPTAPNLIVNDDESTAR	S					Elution from: 106.673 to 106.673 period: 0 experiment: 1 cycles: 1 precIntensity: 59981.0 FinneganScanNumber: 9703 MStype: enumIsNormalMS rawFile: 16H146_5_120M.raw
3	gi|868875344	Uncharacterized protein MALG_00714 [Marinovum algicola DG 898]	681	96911	29	19	9	9	8156	1	1	1	1064.13	3189.36	3	3189.35	0.0025	1	70.73	0.0005	R	DGDQANNTDVQWKENCTDSDPTTTAPGPR	A					Elution from: 40.878 to 40.878 period: 0 experiment: 1 cycles: 1 precIntensity: 97901.0 FinneganScanNumber: 3298 MStype: enumIsNormalMS rawFile: 16H146_5_120M.raw
3	gi|868875344	Uncharacterized protein MALG_00714 [Marinovum algicola DG 898]	681	96911	29	19	9	9	8157	1	1	1	1064.13	3189.36	3	3189.35	0.0032	1	62.78	0.0032	R	DGDQANNTDVQWKENCTDSDPTTTAPGPR	A					Elution from: 40.990 to 40.990 period: 0 experiment: 1 cycles: 1 precIntensity: 204973.0 FinneganScanNumber: 3310 MStype: enumIsNormalMS rawFile: 16H146_5_120M.raw
3	gi|868875344	Uncharacterized protein MALG_00714 [Marinovum algicola DG 898]	681	96911	29	19	9	9	8203	1	1	1	1283.94	3848.8	3	3848.79	0.0134	0	37.41	5.7	R	VAVTNAAVTGVAPDDHSNDPSVPGACTAITDNNVDTAGR	I					Elution from: 84.125 to 84.125 period: 0 experiment: 1 cycles: 1 precIntensity: 22719.0 FinneganScanNumber: 7726 MStype: enumIsNormalMS rawFile: 16H146_5_120M.raw
3	gi|868875344	Uncharacterized protein MALG_00714 [Marinovum algicola DG 898]	681	96911	29	19	9	9	8204	1	1	1	1284.27	3849.78	3	3849.77	0.0138	0	101	2.2e-06	R	VAVTNAAVTGVAPDDHSNDPSVPGACTAITDNNVDTAGR	I	Deamidated (NQ)	0.000000000000000001000000000000000000000.0			Elution from: 63.913 to 63.913 period: 0 experiment: 1 cycles: 1 precIntensity: 55357.0 FinneganScanNumber: 5765 MStype: enumIsNormalMS rawFile: 16H146_5_120M.raw
3	gi|868875344	Uncharacterized protein MALG_00714 [Marinovum algicola DG 898]	681	96911	29	19	9	9	8205	1	1	1	1284.27	3849.79	3	3849.77	0.0187	0	88.18	4.5e-05	R	VAVTNAAVTGVAPDDHSNDPSVPGACTAITDNNVDTAGR	I	Deamidated (NQ)	0.000000000000000001000000000000000000000.0			Elution from: 63.863 to 63.863 period: 0 experiment: 1 cycles: 1 precIntensity: 46660.0 FinneganScanNumber: 5760 MStype: enumIsNormalMS rawFile: 16H146_5_120M.raw
4	gi|872560961	amino acid ABC transporter substrate-binding protein [Marinovum algicola]	637	35995	102	29	9	6	1713	1	1	0	440.766	879.517	2	879.518	-0.0004	0	32.97	3.5	K	EPLGPLVR	H					Elution from: 42.310 to 42.310 period: 0 experiment: 1 cycles: 1 precIntensity: 481148.0 FinneganScanNumber: 3454 MStype: enumIsNormalMS rawFile: 16H146_5_120M.raw
4	gi|872560961	amino acid ABC transporter substrate-binding protein [Marinovum algicola]	637	35995	102	29	9	6	1718	1	1	0	440.766	879.518	2	879.518	-0.0002	0	28.5	9.9	K	EPLGPLVR	H					Elution from: 44.365 to 44.365 period: 0 experiment: 1 cycles: 1 precIntensity: 240574.0 FinneganScanNumber: 3676 MStype: enumIsNormalMS rawFile: 16H146_5_120M.raw
4	gi|872560961	amino acid ABC transporter substrate-binding protein [Marinovum algicola]	637	35995	102	29	9	6	1721	1	1	0	440.766	879.518	2	879.518	-0.0002	0	35.54	2	K	EPLGPLVR	H					Elution from: 42.255 to 42.255 period: 0 experiment: 1 cycles: 1 precIntensity: 444956.0 FinneganScanNumber: 3448 MStype: enumIsNormalMS rawFile: 16H146_5_120M.raw
4	gi|872560961	amino acid ABC transporter substrate-binding protein [Marinovum algicola]	637	35995	102	29	9	6	1729	1	1	0	440.766	879.518	2	879.518	0.0001	0	30.68	6	K	EPLGPLVR	H					Elution from: 44.418 to 44.418 period: 0 experiment: 1 cycles: 1 precIntensity: 228806.0 FinneganScanNumber: 3682 MStype: enumIsNormalMS rawFile: 16H146_5_120M.raw
4	gi|872560961	amino acid ABC transporter substrate-binding protein [Marinovum algicola]	637	35995	102	29	9	6	2416	1	1	0	506.745	1011.48	2	1011.48	-0.0015	0	27.37	23	R	NTTWTFSR	D					Elution from: 64.470 to 64.470 period: 0 experiment: 1 cycles: 1 precIntensity: 86868.0 FinneganScanNumber: 5824 MStype: enumIsNormalMS rawFile: 16H146_5_120M.raw
4	gi|872560961	amino acid ABC transporter substrate-binding protein [Marinovum algicola]	637	35995	102	29	9	6	2419	1	1	0	506.745	1011.48	2	1011.48	-0.0015	0	41.9	0.8	R	NTTWTFSR	D					Elution from: 45.750 to 45.750 period: 0 experiment: 1 cycles: 1 precIntensity: 522782.0 FinneganScanNumber: 3820 MStype: enumIsNormalMS rawFile: 16H146_5_120M.raw
4	gi|872560961	amino acid ABC transporter substrate-binding protein [Marinovum algicola]	637	35995	102	29	9	6	2421	1	1	0	506.745	1011.48	2	1011.48	-0.0015	0	32.63	6.7	R	NTTWTFSR	D					Elution from: 51.957 to 51.957 period: 0 experiment: 1 cycles: 1 precIntensity: 133620.0 FinneganScanNumber: 4480 MStype: enumIsNormalMS rawFile: 16H146_5_120M.raw
4	gi|872560961	amino acid ABC transporter substrate-binding protein [Marinovum algicola]	637	35995	102	29	9	6	2422	1	1	0	506.745	1011.48	2	1011.48	-0.0015	0	26.81	25	R	NTTWTFSR	D					Elution from: 52.010 to 52.010 period: 0 experiment: 1 cycles: 1 precIntensity: 149836.0 FinneganScanNumber: 4486 MStype: enumIsNormalMS rawFile: 16H146_5_120M.raw
4	gi|872560961	amino acid ABC transporter substrate-binding protein [Marinovum algicola]	637	35995	102	29	9	6	2425	1	1	0	506.745	1011.48	2	1011.48	-0.0013	0	25.52	34	R	NTTWTFSR	D					Elution from: 49.925 to 49.925 period: 0 experiment: 1 cycles: 1 precIntensity: 237674.0 FinneganScanNumber: 4262 MStype: enumIsNormalMS rawFile: 16H146_5_120M.raw
4	gi|872560961	amino acid ABC transporter substrate-binding protein [Marinovum algicola]	637	35995	102	29	9	6	2427	1	1	0	506.745	1011.48	2	1011.48	-0.0012	0	44.53	0.43	R	NTTWTFSR	D					Elution from: 47.793 to 47.793 period: 0 experiment: 1 cycles: 1 precIntensity: 318370.0 FinneganScanNumber: 4036 MStype: enumIsNormalMS rawFile: 16H146_5_120M.raw
4	gi|872560961	amino acid ABC transporter substrate-binding protein [Marinovum algicola]	637	35995	102	29	9	6	2429	5	1	0	506.745	1011.48	2	1011.48	-0.0012	0	21.61	83	R	NTTWTFSR	D					Elution from: 62.395 to 62.395 period: 0 experiment: 1 cycles: 1 precIntensity: 183500.0 FinneganScanNumber: 5607 MStype: enumIsNormalMS rawFile: 16H146_5_120M.raw
4	gi|872560961	amino acid ABC transporter substrate-binding protein [Marinovum algicola]	637	35995	102	29	9	6	2430	1	1	0	506.745	1011.48	2	1011.48	-0.0011	0	32.32	7.1	R	NTTWTFSR	D					Elution from: 66.647 to 66.647 period: 0 experiment: 1 cycles: 1 precIntensity: 101492.0 FinneganScanNumber: 6047 MStype: enumIsNormalMS rawFile: 16H146_5_120M.raw
4	gi|872560961	amino acid ABC transporter substrate-binding protein [Marinovum algicola]	637	35995	102	29	9	6	2431	1	1	0	506.745	1011.48	2	1011.48	-0.0011	0	34.87	4	R	NTTWTFSR	D					Elution from: 49.875 to 49.875 period: 0 experiment: 1 cycles: 1 precIntensity: 213146.0 FinneganScanNumber: 4256 MStype: enumIsNormalMS rawFile: 16H146_5_120M.raw
4	gi|872560961	amino acid ABC transporter substrate-binding protein [Marinovum algicola]	637	35995	102	29	9	6	2432	1	1	0	506.746	1011.48	2	1011.48	-0.0008	0	27.77	21	R	NTTWTFSR	D					Elution from: 47.835 to 47.835 period: 0 experiment: 1 cycles: 1 precIntensity: 321006.0 FinneganScanNumber: 4042 MStype: enumIsNormalMS rawFile: 16H146_5_120M.raw
4	gi|872560961	amino acid ABC transporter substrate-binding protein [Marinovum algicola]	637	35995	102	29	9	6	2434	6	1	0	506.746	1011.48	2	1011.48	-0.0007	0	20.14	120	R	NTTWTFSR	D					Elution from: 54.062 to 54.062 period: 0 experiment: 1 cycles: 1 precIntensity: 140856.0 FinneganScanNumber: 4709 MStype: enumIsNormalMS rawFile: 16H146_5_120M.raw
4	gi|872560961	amino acid ABC transporter substrate-binding protein [Marinovum algicola]	637	35995	102	29	9	6	2437	1	1	0	506.746	1011.48	2	1011.48	-0.0004	0	27.36	23	R	NTTWTFSR	D					Elution from: 45.705 to 45.705 period: 0 experiment: 1 cycles: 1 precIntensity: 508995.0 FinneganScanNumber: 3814 MStype: enumIsNormalMS rawFile: 16H146_5_120M.raw
4	gi|872560961	amino acid ABC transporter substrate-binding protein [Marinovum algicola]	637	35995	102	29	9	6	2438	4	1	0	506.746	1011.48	2	1011.48	-0.0004	0	21.6	86	R	NTTWTFSR	D					Elution from: 58.247 to 58.247 period: 0 experiment: 1 cycles: 1 precIntensity: 102431.0 FinneganScanNumber: 5155 MStype: enumIsNormalMS rawFile: 16H146_5_120M.raw
4	gi|872560961	amino acid ABC transporter substrate-binding protein [Marinovum algicola]	637	35995	102	29	9	6	2439	2	1	0	506.746	1011.48	2	1011.48	-0.0003	0	26.48	28	R	NTTWTFSR	D					Elution from: 60.373 to 60.373 period: 0 experiment: 1 cycles: 1 precIntensity: 71735.0 FinneganScanNumber: 5383 MStype: enumIsNormalMS rawFile: 16H146_5_120M.raw
4	gi|872560961	amino acid ABC transporter substrate-binding protein [Marinovum algicola]	637	35995	102	29	9	6	2441	1	1	0	506.746	1011.48	2	1011.48	-0.0003	0	24.65	42	R	NTTWTFSR	D					Elution from: 66.578 to 66.578 period: 0 experiment: 1 cycles: 1 precIntensity: 129862.0 FinneganScanNumber: 6040 MStype: enumIsNormalMS rawFile: 16H146_5_120M.raw
4	gi|872560961	amino acid ABC transporter substrate-binding protein [Marinovum algicola]	637	35995	102	29	9	6	2444	3	1	0	506.746	1011.48	2	1011.48	0.0002	0	20.16	120	R	NTTWTFSR	D					Elution from: 74.958 to 74.958 period: 0 experiment: 1 cycles: 1 precIntensity: 60732.0 FinneganScanNumber: 6882 MStype: enumIsNormalMS rawFile: 16H146_5_120M.raw
4	gi|872560961	amino acid ABC transporter substrate-binding protein [Marinovum algicola]	637	35995	102	29	9	6	2446	1	1	0	506.746	1011.48	2	1011.48	0.0004	0	34.54	4.4	R	NTTWTFSR	D					Elution from: 60.323 to 60.323 period: 0 experiment: 1 cycles: 1 precIntensity: 115873.0 FinneganScanNumber: 5377 MStype: enumIsNormalMS rawFile: 16H146_5_120M.raw
4	gi|872560961	amino acid ABC transporter substrate-binding protein [Marinovum algicola]	637	35995	102	29	9	6	2448	1	1	0	506.747	1011.48	2	1011.48	0.0015	0	33.47	3.9	R	NTTWTFSR	D					Elution from: 64.533 to 64.533 period: 0 experiment: 1 cycles: 1 precIntensity: 88387.0 FinneganScanNumber: 5831 MStype: enumIsNormalMS rawFile: 16H146_5_120M.raw
4	gi|872560961	amino acid ABC transporter substrate-binding protein [Marinovum algicola]	637	35995	102	29	9	6	3304	1	1	0	592.783	1183.55	2	1183.55	-0.0001	0	74.39	0.00057	K	AGGNYGELFEK	H					Elution from: 64.242 to 64.242 period: 0 experiment: 1 cycles: 1 precIntensity: 172151.0 FinneganScanNumber: 5800 MStype: enumIsNormalMS rawFile: 16H146_5_120M.raw
4	gi|872560961	amino acid ABC transporter substrate-binding protein [Marinovum algicola]	637	35995	102	29	9	6	3305	1	1	0	592.783	1183.55	2	1183.55	0.0001	0	51.15	0.12	K	AGGNYGELFEK	H					Elution from: 51.633 to 51.633 period: 0 experiment: 1 cycles: 1 precIntensity: 903527.0 FinneganScanNumber: 4444 MStype: enumIsNormalMS rawFile: 16H146_5_120M.raw
4	gi|872560961	amino acid ABC transporter substrate-binding protein [Marinovum algicola]	637	35995	102	29	9	6	3306	1	1	0	592.783	1183.55	2	1183.55	0.0001	0	36.55	3.5	K	AGGNYGELFEK	H					Elution from: 76.288 to 76.288 period: 0 experiment: 1 cycles: 1 precIntensity: 116964.0 FinneganScanNumber: 7007 MStype: enumIsNormalMS rawFile: 16H146_5_120M.raw
4	gi|872560961	amino acid ABC transporter substrate-binding protein [Marinovum algicola]	637	35995	102	29	9	6	3307	1	1	0	592.783	1183.55	2	1183.55	0.0002	0	52.33	0.091	K	AGGNYGELFEK	H					Elution from: 59.938 to 59.938 period: 0 experiment: 1 cycles: 1 precIntensity: 199349.0 FinneganScanNumber: 5335 MStype: enumIsNormalMS rawFile: 16H146_5_120M.raw
4	gi|872560961	amino acid ABC transporter substrate-binding protein [Marinovum algicola]	637	35995	102	29	9	6	3308	1	1	0	592.783	1183.55	2	1183.55	0.0004	0	63.77	0.0066	K	AGGNYGELFEK	H					Elution from: 64.145 to 64.145 period: 0 experiment: 1 cycles: 1 precIntensity: 138189.0 FinneganScanNumber: 5788 MStype: enumIsNormalMS rawFile: 16H146_5_120M.raw
4	gi|872560961	amino acid ABC transporter substrate-binding protein [Marinovum algicola]	637	35995	102	29	9	6	3309	1	1	0	592.783	1183.55	2	1183.55	0.0004	0	72.27	0.00093	K	AGGNYGELFEK	H					Elution from: 55.767 to 55.767 period: 0 experiment: 1 cycles: 1 precIntensity: 72972.0 FinneganScanNumber: 4895 MStype: enumIsNormalMS rawFile: 16H146_5_120M.raw
4	gi|872560961	amino acid ABC transporter substrate-binding protein [Marinovum algicola]	637	35995	102	29	9	6	3310	1	1	0	592.783	1183.55	2	1183.55	0.0005	0	68.87	0.002	K	AGGNYGELFEK	H					Elution from: 55.813 to 55.813 period: 0 experiment: 1 cycles: 1 precIntensity: 303245.0 FinneganScanNumber: 4901 MStype: enumIsNormalMS rawFile: 16H146_5_120M.raw
4	gi|872560961	amino acid ABC transporter substrate-binding protein [Marinovum algicola]	637	35995	102	29	9	6	3311	2	1	0	592.783	1183.55	2	1183.55	0.0005	0	25.34	46	K	AGGNYGELFEK	H					Elution from: 75.653 to 75.653 period: 0 experiment: 1 cycles: 1 precIntensity: 90888.0 FinneganScanNumber: 6947 MStype: enumIsNormalMS rawFile: 16H146_5_120M.raw
4	gi|872560961	amino acid ABC transporter substrate-binding protein [Marinovum algicola]	637	35995	102	29	9	6	3312	1	1	0	592.783	1183.55	2	1183.55	0.0006	0	60.98	0.012	K	AGGNYGELFEK	H					Elution from: 53.740 to 53.740 period: 0 experiment: 1 cycles: 1 precIntensity: 660784.0 FinneganScanNumber: 4672 MStype: enumIsNormalMS rawFile: 16H146_5_120M.raw
4	gi|872560961	amino acid ABC transporter substrate-binding protein [Marinovum algicola]	637	35995	102	29	9	6	3313	1	1	0	592.783	1183.55	2	1183.55	0.0008	0	66.26	0.0037	K	AGGNYGELFEK	H					Elution from: 60.000 to 60.000 period: 0 experiment: 1 cycles: 1 precIntensity: 209470.0 FinneganScanNumber: 5342 MStype: enumIsNormalMS rawFile: 16H146_5_120M.raw
4	gi|872560961	amino acid ABC transporter substrate-binding protein [Marinovum algicola]	637	35995	102	29	9	6	3314	1	1	0	592.783	1183.55	2	1183.55	0.0009	0	54.49	0.057	K	AGGNYGELFEK	H					Elution from: 51.682 to 51.682 period: 0 experiment: 1 cycles: 1 precIntensity: 1099722.0 FinneganScanNumber: 4450 MStype: enumIsNormalMS rawFile: 16H146_5_120M.raw
4	gi|872560961	amino acid ABC transporter substrate-binding protein [Marinovum algicola]	637	35995	102	29	9	6	3315	1	1	0	592.783	1183.55	2	1183.55	0.0012	0	56.84	0.033	K	AGGNYGELFEK	H					Elution from: 57.897 to 57.897 period: 0 experiment: 1 cycles: 1 precIntensity: 250971.0 FinneganScanNumber: 5116 MStype: enumIsNormalMS rawFile: 16H146_5_120M.raw
4	gi|872560961	amino acid ABC transporter substrate-binding protein [Marinovum algicola]	637	35995	102	29	9	6	3316	1	1	0	592.783	1183.55	2	1183.55	0.0013	0	68.76	0.0022	K	AGGNYGELFEK	H					Elution from: 53.695 to 53.695 period: 0 experiment: 1 cycles: 1 precIntensity: 587938.0 FinneganScanNumber: 4666 MStype: enumIsNormalMS rawFile: 16H146_5_120M.raw
4	gi|872560961	amino acid ABC transporter substrate-binding protein [Marinovum algicola]	637	35995	102	29	9	6	3317	1	1	0	592.783	1183.55	2	1183.55	0.0013	0	55.17	0.054	K	AGGNYGELFEK	H					Elution from: 62.283 to 62.283 period: 0 experiment: 1 cycles: 1 precIntensity: 156350.0 FinneganScanNumber: 5595 MStype: enumIsNormalMS rawFile: 16H146_5_120M.raw
4	gi|872560961	amino acid ABC transporter substrate-binding protein [Marinovum algicola]	637	35995	102	29	9	6	3954	1	1	1	640.34	1278.67	2	1278.67	-0.0026	0	61.99	0.016	K	HIGENTPVGLSR	G					Elution from: 35.328 to 35.328 period: 0 experiment: 1 cycles: 1 precIntensity: 239916.0 FinneganScanNumber: 2729 MStype: enumIsNormalMS rawFile: 16H146_5_120M.raw
4	gi|872560961	amino acid ABC transporter substrate-binding protein [Marinovum algicola]	637	35995	102	29	9	6	3955	1	1	1	640.34	1278.67	2	1278.67	-0.0024	0	69.8	0.0028	K	HIGENTPVGLSR	G					Elution from: 29.168 to 29.168 period: 0 experiment: 1 cycles: 1 precIntensity: 276151.0 FinneganScanNumber: 2102 MStype: enumIsNormalMS rawFile: 16H146_5_120M.raw
4	gi|872560961	amino acid ABC transporter substrate-binding protein [Marinovum algicola]	637	35995	102	29	9	6	3956	1	1	1	640.34	1278.67	2	1278.67	-0.0023	0	41.18	2.2	K	HIGENTPVGLSR	G					Elution from: 45.793 to 45.793 period: 0 experiment: 1 cycles: 1 precIntensity: 108431.0 FinneganScanNumber: 3826 MStype: enumIsNormalMS rawFile: 16H146_5_120M.raw
4	gi|872560961	amino acid ABC transporter substrate-binding protein [Marinovum algicola]	637	35995	102	29	9	6	3957	1	1	1	640.34	1278.67	2	1278.67	-0.0021	0	43	1.5	K	HIGENTPVGLSR	G					Elution from: 39.493 to 39.493 period: 0 experiment: 1 cycles: 1 precIntensity: 161343.0 FinneganScanNumber: 3154 MStype: enumIsNormalMS rawFile: 16H146_5_120M.raw
4	gi|872560961	amino acid ABC transporter substrate-binding protein [Marinovum algicola]	637	35995	102	29	9	6	3959	1	1	1	640.34	1278.67	2	1278.67	-0.002	0	49.57	0.32	K	HIGENTPVGLSR	G					Elution from: 45.760 to 45.760 period: 0 experiment: 1 cycles: 1 precIntensity: 122625.0 FinneganScanNumber: 3822 MStype: enumIsNormalMS rawFile: 16H146_5_120M.raw
4	gi|872560961	amino acid ABC transporter substrate-binding protein [Marinovum algicola]	637	35995	102	29	9	6	3960	1	1	1	640.34	1278.67	2	1278.67	-0.0017	0	42.16	1.8	K	HIGENTPVGLSR	G					Elution from: 33.318 to 33.318 period: 0 experiment: 1 cycles: 1 precIntensity: 165620.0 FinneganScanNumber: 2522 MStype: enumIsNormalMS rawFile: 16H146_5_120M.raw
4	gi|872560961	amino acid ABC transporter substrate-binding protein [Marinovum algicola]	637	35995	102	29	9	6	3962	1	1	1	640.341	1278.67	2	1278.67	-0.0016	0	68.22	0.0044	K	HIGENTPVGLSR	G					Elution from: 33.267 to 33.267 period: 0 experiment: 1 cycles: 1 precIntensity: 179383.0 FinneganScanNumber: 2516 MStype: enumIsNormalMS rawFile: 16H146_5_120M.raw
4	gi|872560961	amino acid ABC transporter substrate-binding protein [Marinovum algicola]	637	35995	102	29	9	6	3963	1	1	1	640.341	1278.67	2	1278.67	-0.0016	0	35.3	8.6	K	HIGENTPVGLSR	G					Elution from: 39.558 to 39.558 period: 0 experiment: 1 cycles: 1 precIntensity: 127534.0 FinneganScanNumber: 3161 MStype: enumIsNormalMS rawFile: 16H146_5_120M.raw
4	gi|872560961	amino acid ABC transporter substrate-binding protein [Marinovum algicola]	637	35995	102	29	9	6	3965	1	1	1	640.341	1278.67	2	1278.67	-0.0015	0	35.65	7.6	K	HIGENTPVGLSR	G					Elution from: 54.277 to 54.277 period: 0 experiment: 1 cycles: 1 precIntensity: 92533.0 FinneganScanNumber: 4732 MStype: enumIsNormalMS rawFile: 16H146_5_120M.raw
4	gi|872560961	amino acid ABC transporter substrate-binding protein [Marinovum algicola]	637	35995	102	29	9	6	3967	2	1	1	640.341	1278.67	2	1278.67	-0.0014	0	25.51	76	K	HIGENTPVGLSR	G					Elution from: 54.220 to 54.220 period: 0 experiment: 1 cycles: 1 precIntensity: 78393.0 FinneganScanNumber: 4726 MStype: enumIsNormalMS rawFile: 16H146_5_120M.raw
4	gi|872560961	amino acid ABC transporter substrate-binding protein [Marinovum algicola]	637	35995	102	29	9	6	3968	1	1	1	640.341	1278.67	2	1278.67	-0.0014	0	54.96	0.086	K	HIGENTPVGLSR	G					Elution from: 43.687 to 43.687 period: 0 experiment: 1 cycles: 1 precIntensity: 138549.0 FinneganScanNumber: 3604 MStype: enumIsNormalMS rawFile: 16H146_5_120M.raw
4	gi|872560961	amino acid ABC transporter substrate-binding protein [Marinovum algicola]	637	35995	102	29	9	6	3969	1	1	1	640.341	1278.67	2	1278.67	-0.0014	0	55.78	0.072	K	HIGENTPVGLSR	G					Elution from: 31.245 to 31.245 period: 0 experiment: 1 cycles: 1 precIntensity: 205225.0 FinneganScanNumber: 2310 MStype: enumIsNormalMS rawFile: 16H146_5_120M.raw
4	gi|872560961	amino acid ABC transporter substrate-binding protein [Marinovum algicola]	637	35995	102	29	9	6	3970	1	1	1	640.341	1278.67	2	1278.67	-0.0013	0	51.39	0.2	K	HIGENTPVGLSR	G					Elution from: 43.748 to 43.748 period: 0 experiment: 1 cycles: 1 precIntensity: 152520.0 FinneganScanNumber: 3611 MStype: enumIsNormalMS rawFile: 16H146_5_120M.raw
4	gi|872560961	amino acid ABC transporter substrate-binding protein [Marinovum algicola]	637	35995	102	29	9	6	3971	1	1	1	640.341	1278.67	2	1278.67	-0.0013	0	66.95	0.0055	K	HIGENTPVGLSR	G					Elution from: 35.387 to 35.387 period: 0 experiment: 1 cycles: 1 precIntensity: 174794.0 FinneganScanNumber: 2735 MStype: enumIsNormalMS rawFile: 16H146_5_120M.raw
4	gi|872560961	amino acid ABC transporter substrate-binding protein [Marinovum algicola]	637	35995	102	29	9	6	3979	1	1	1	640.341	1278.67	2	1278.67	-0.0008	0	37.71	4.1	K	HIGENTPVGLSR	G					Elution from: 52.193 to 52.193 period: 0 experiment: 1 cycles: 1 precIntensity: 81675.0 FinneganScanNumber: 4505 MStype: enumIsNormalMS rawFile: 16H146_5_120M.raw
4	gi|872560961	amino acid ABC transporter substrate-binding protein [Marinovum algicola]	637	35995	102	29	9	6	3981	1	1	1	640.341	1278.67	2	1278.67	-0.0007	0	50.07	0.24	K	HIGENTPVGLSR	G					Elution from: 41.652 to 41.652 period: 0 experiment: 1 cycles: 1 precIntensity: 151624.0 FinneganScanNumber: 3383 MStype: enumIsNormalMS rawFile: 16H146_5_120M.raw
4	gi|872560961	amino acid ABC transporter substrate-binding protein [Marinovum algicola]	637	35995	102	29	9	6	3989	1	1	1	640.341	1278.67	2	1278.67	-0.0003	0	32.2	14	K	HIGENTPVGLSR	G					Elution from: 47.943 to 47.943 period: 0 experiment: 1 cycles: 1 precIntensity: 132452.0 FinneganScanNumber: 4054 MStype: enumIsNormalMS rawFile: 16H146_5_120M.raw
4	gi|872560961	amino acid ABC transporter substrate-binding protein [Marinovum algicola]	637	35995	102	29	9	6	3990	1	1	1	640.341	1278.67	2	1278.67	-0.0003	0	42.3	1.4	K	HIGENTPVGLSR	G					Elution from: 37.485 to 37.485 period: 0 experiment: 1 cycles: 1 precIntensity: 132810.0 FinneganScanNumber: 2945 MStype: enumIsNormalMS rawFile: 16H146_5_120M.raw
4	gi|872560961	amino acid ABC transporter substrate-binding protein [Marinovum algicola]	637	35995	102	29	9	6	3992	1	1	1	640.341	1278.67	2	1278.67	-0.0001	0	74.67	0.00077	K	HIGENTPVGLSR	G					Elution from: 31.200 to 31.200 period: 0 experiment: 1 cycles: 1 precIntensity: 207778.0 FinneganScanNumber: 2305 MStype: enumIsNormalMS rawFile: 16H146_5_120M.raw
4	gi|872560961	amino acid ABC transporter substrate-binding protein [Marinovum algicola]	637	35995	102	29	9	6	3998	6	1	1	640.342	1278.67	2	1278.67	0.0013	0	21.08	220	K	HIGENTPVGLSR	G					Elution from: 50.048 to 50.048 period: 0 experiment: 1 cycles: 1 precIntensity: 98515.0 FinneganScanNumber: 4275 MStype: enumIsNormalMS rawFile: 16H146_5_120M.raw
4	gi|872560961	amino acid ABC transporter substrate-binding protein [Marinovum algicola]	637	35995	102	29	9	6	3999	1	1	1	640.342	1278.67	2	1278.67	0.0015	0	43.38	1.3	K	HIGENTPVGLSR	G					Elution from: 41.595 to 41.595 period: 0 experiment: 1 cycles: 1 precIntensity: 172919.0 FinneganScanNumber: 3377 MStype: enumIsNormalMS rawFile: 16H146_5_120M.raw
4	gi|872560961	amino acid ABC transporter substrate-binding protein [Marinovum algicola]	637	35995	102	29	9	6	4158	1	1	1	649.778	1297.54	2	1297.54	-0.0016	0	48.34	0.074	R	HGDNEWGDVNR	W					Elution from: 29.345 to 29.345 period: 0 experiment: 1 cycles: 1 precIntensity: 53742.0 FinneganScanNumber: 2120 MStype: enumIsNormalMS rawFile: 16H146_5_120M.raw
4	gi|872560961	amino acid ABC transporter substrate-binding protein [Marinovum algicola]	637	35995	102	29	9	6	4161	2	1	1	433.521	1297.54	3	1297.54	-0.0013	0	21	37	R	HGDNEWGDVNR	W					Elution from: 41.848 to 41.848 period: 0 experiment: 1 cycles: 1 precIntensity: 48158.0 FinneganScanNumber: 3404 MStype: enumIsNormalMS rawFile: 16H146_5_120M.raw
4	gi|872560961	amino acid ABC transporter substrate-binding protein [Marinovum algicola]	637	35995	102	29	9	6	4163	1	1	1	649.779	1297.54	2	1297.54	-0.0012	0	27.32	8.6	R	HGDNEWGDVNR	W					Elution from: 52.922 to 52.922 period: 0 experiment: 1 cycles: 1 precIntensity: 57628.0 FinneganScanNumber: 4583 MStype: enumIsNormalMS rawFile: 16H146_5_120M.raw
4	gi|872560961	amino acid ABC transporter substrate-binding protein [Marinovum algicola]	637	35995	102	29	9	6	4164	1	1	1	649.779	1297.54	2	1297.54	-0.0012	0	39.28	0.55	R	HGDNEWGDVNR	W					Elution from: 57.283 to 57.283 period: 0 experiment: 1 cycles: 1 precIntensity: 70865.0 FinneganScanNumber: 5051 MStype: enumIsNormalMS rawFile: 16H146_5_120M.raw
4	gi|872560961	amino acid ABC transporter substrate-binding protein [Marinovum algicola]	637	35995	102	29	9	6	4165	1	1	1	649.779	1297.54	2	1297.54	-0.0011	0	42.12	0.28	R	HGDNEWGDVNR	W					Elution from: 39.892 to 39.892 period: 0 experiment: 1 cycles: 1 precIntensity: 59586.0 FinneganScanNumber: 3196 MStype: enumIsNormalMS rawFile: 16H146_5_120M.raw
4	gi|872560961	amino acid ABC transporter substrate-binding protein [Marinovum algicola]	637	35995	102	29	9	6	4166	1	1	1	649.779	1297.54	2	1297.54	-0.0011	0	38.31	0.68	R	HGDNEWGDVNR	W					Elution from: 47.148 to 47.148 period: 0 experiment: 1 cycles: 1 precIntensity: 63149.0 FinneganScanNumber: 3972 MStype: enumIsNormalMS rawFile: 16H146_5_120M.raw
4	gi|872560961	amino acid ABC transporter substrate-binding protein [Marinovum algicola]	637	35995	102	29	9	6	4167	1	1	1	649.779	1297.54	2	1297.54	-0.0011	0	38.81	0.61	R	HGDNEWGDVNR	W					Elution from: 29.293 to 29.293 period: 0 experiment: 1 cycles: 1 precIntensity: 46368.0 FinneganScanNumber: 2115 MStype: enumIsNormalMS rawFile: 16H146_5_120M.raw
4	gi|872560961	amino acid ABC transporter substrate-binding protein [Marinovum algicola]	637	35995	102	29	9	6	4169	1	1	1	649.779	1297.54	2	1297.54	-0.001	0	54.09	0.018	R	HGDNEWGDVNR	W					Elution from: 27.235 to 27.235 period: 0 experiment: 1 cycles: 1 precIntensity: 67268.0 FinneganScanNumber: 1910 MStype: enumIsNormalMS rawFile: 16H146_5_120M.raw
4	gi|872560961	amino acid ABC transporter substrate-binding protein [Marinovum algicola]	637	35995	102	29	9	6	4171	1	1	1	649.779	1297.54	2	1297.54	-0.0008	0	24.18	18	R	HGDNEWGDVNR	W					Elution from: 51.748 to 51.748 period: 0 experiment: 1 cycles: 1 precIntensity: 39422.0 FinneganScanNumber: 4458 MStype: enumIsNormalMS rawFile: 16H146_5_120M.raw
4	gi|872560961	amino acid ABC transporter substrate-binding protein [Marinovum algicola]	637	35995	102	29	9	6	4173	1	1	1	649.779	1297.54	2	1297.54	-0.0008	0	54.87	0.015	R	HGDNEWGDVNR	W					Elution from: 31.470 to 31.470 period: 0 experiment: 1 cycles: 1 precIntensity: 73047.0 FinneganScanNumber: 2334 MStype: enumIsNormalMS rawFile: 16H146_5_120M.raw
4	gi|872560961	amino acid ABC transporter substrate-binding protein [Marinovum algicola]	637	35995	102	29	9	6	4174	1	1	1	649.779	1297.54	2	1297.54	-0.0008	0	45.57	0.13	R	HGDNEWGDVNR	W					Elution from: 39.832 to 39.832 period: 0 experiment: 1 cycles: 1 precIntensity: 68327.0 FinneganScanNumber: 3190 MStype: enumIsNormalMS rawFile: 16H146_5_120M.raw
4	gi|872560961	amino acid ABC transporter substrate-binding protein [Marinovum algicola]	637	35995	102	29	9	6	4176	1	1	1	649.779	1297.54	2	1297.54	-0.0006	0	62.92	0.0023	R	HGDNEWGDVNR	W					Elution from: 27.193 to 27.193 period: 0 experiment: 1 cycles: 1 precIntensity: 55075.0 FinneganScanNumber: 1905 MStype: enumIsNormalMS rawFile: 16H146_5_120M.raw
4	gi|872560961	amino acid ABC transporter substrate-binding protein [Marinovum algicola]	637	35995	102	29	9	6	4177	1	1	1	649.779	1297.54	2	1297.54	-0.0006	0	31.04	3.6	R	HGDNEWGDVNR	W					Elution from: 57.237 to 57.237 period: 0 experiment: 1 cycles: 1 precIntensity: 51308.0 FinneganScanNumber: 5046 MStype: enumIsNormalMS rawFile: 16H146_5_120M.raw
4	gi|872560961	amino acid ABC transporter substrate-binding protein [Marinovum algicola]	637	35995	102	29	9	6	4179	1	1	1	649.779	1297.54	2	1297.54	-0.0005	0	23.07	23	R	HGDNEWGDVNR	W					Elution from: 50.860 to 50.860 period: 0 experiment: 1 cycles: 1 precIntensity: 50390.0 FinneganScanNumber: 4362 MStype: enumIsNormalMS rawFile: 16H146_5_120M.raw
4	gi|872560961	amino acid ABC transporter substrate-binding protein [Marinovum algicola]	637	35995	102	29	9	6	4180	1	1	1	649.779	1297.54	2	1297.54	-0.0005	0	36.44	1	R	HGDNEWGDVNR	W					Elution from: 41.978 to 41.978 period: 0 experiment: 1 cycles: 1 precIntensity: 50118.0 FinneganScanNumber: 3419 MStype: enumIsNormalMS rawFile: 16H146_5_120M.raw
4	gi|872560961	amino acid ABC transporter substrate-binding protein [Marinovum algicola]	637	35995	102	29	9	6	4181	1	1	1	649.779	1297.54	2	1297.54	-0.0005	0	42.8	0.28	R	HGDNEWGDVNR	W					Elution from: 37.702 to 37.702 period: 0 experiment: 1 cycles: 1 precIntensity: 67336.0 FinneganScanNumber: 2968 MStype: enumIsNormalMS rawFile: 16H146_5_120M.raw
4	gi|872560961	amino acid ABC transporter substrate-binding protein [Marinovum algicola]	637	35995	102	29	9	6	4184	1	1	1	649.779	1297.54	2	1297.54	-0.0004	0	39.43	0.67	R	HGDNEWGDVNR	W					Elution from: 47.107 to 47.107 period: 0 experiment: 1 cycles: 1 precIntensity: 49369.0 FinneganScanNumber: 3967 MStype: enumIsNormalMS rawFile: 16H146_5_120M.raw
4	gi|872560961	amino acid ABC transporter substrate-binding protein [Marinovum algicola]	637	35995	102	29	9	6	4190	1	1	1	649.779	1297.54	2	1297.54	-0.0002	0	43.21	0.28	R	HGDNEWGDVNR	W					Elution from: 37.825 to 37.825 period: 0 experiment: 1 cycles: 1 precIntensity: 47200.0 FinneganScanNumber: 2980 MStype: enumIsNormalMS rawFile: 16H146_5_120M.raw
4	gi|872560961	amino acid ABC transporter substrate-binding protein [Marinovum algicola]	637	35995	102	29	9	6	4193	1	1	1	649.779	1297.54	2	1297.54	-0.0001	0	60.47	0.0053	R	HGDNEWGDVNR	W					Elution from: 31.420 to 31.420 period: 0 experiment: 1 cycles: 1 precIntensity: 65340.0 FinneganScanNumber: 2329 MStype: enumIsNormalMS rawFile: 16H146_5_120M.raw
4	gi|872560961	amino acid ABC transporter substrate-binding protein [Marinovum algicola]	637	35995	102	29	9	6	4199	1	1	1	649.779	1297.54	2	1297.54	0.0001	0	54.03	0.023	R	HGDNEWGDVNR	W					Elution from: 33.500 to 33.500 period: 0 experiment: 1 cycles: 1 precIntensity: 49172.0 FinneganScanNumber: 2540 MStype: enumIsNormalMS rawFile: 16H146_5_120M.raw
4	gi|872560961	amino acid ABC transporter substrate-binding protein [Marinovum algicola]	637	35995	102	29	9	6	4203	1	1	1	649.779	1297.54	2	1297.54	0.0002	0	38.82	0.78	R	HGDNEWGDVNR	W					Elution from: 59.433 to 59.433 period: 0 experiment: 1 cycles: 1 precIntensity: 35183.0 FinneganScanNumber: 5283 MStype: enumIsNormalMS rawFile: 16H146_5_120M.raw
4	gi|872560961	amino acid ABC transporter substrate-binding protein [Marinovum algicola]	637	35995	102	29	9	6	4209	1	1	1	649.779	1297.54	2	1297.54	0.0005	0	41.6	0.42	R	HGDNEWGDVNR	W					Elution from: 55.048 to 55.048 period: 0 experiment: 1 cycles: 1 precIntensity: 27511.0 FinneganScanNumber: 4814 MStype: enumIsNormalMS rawFile: 16H146_5_120M.raw
4	gi|872560961	amino acid ABC transporter substrate-binding protein [Marinovum algicola]	637	35995	102	29	9	6	4215	1	1	1	649.779	1297.54	2	1297.54	0.0006	0	31.8	4	R	HGDNEWGDVNR	W					Elution from: 61.972 to 61.972 period: 0 experiment: 1 cycles: 1 precIntensity: 41611.0 FinneganScanNumber: 5560 MStype: enumIsNormalMS rawFile: 16H146_5_120M.raw
4	gi|872560961	amino acid ABC transporter substrate-binding protein [Marinovum algicola]	637	35995	102	29	9	6	4222	1	1	1	649.781	1297.55	2	1297.54	0.0036	0	38.59	0.9	R	HGDNEWGDVNR	W					Elution from: 55.087 to 55.087 period: 0 experiment: 1 cycles: 1 precIntensity: 36072.0 FinneganScanNumber: 4818 MStype: enumIsNormalMS rawFile: 16H146_5_120M.raw
4	gi|872560961	amino acid ABC transporter substrate-binding protein [Marinovum algicola]	637	35995	102	29	9	6	4223	1	1	1	649.781	1297.55	2	1297.54	0.0038	0	33.95	2.6	R	HGDNEWGDVNR	W					Elution from: 50.582 to 50.582 period: 0 experiment: 1 cycles: 1 precIntensity: 49094.0 FinneganScanNumber: 4332 MStype: enumIsNormalMS rawFile: 16H146_5_120M.raw
4	gi|872560961	amino acid ABC transporter substrate-binding protein [Marinovum algicola]	637	35995	102	29	9	6	4224	1	1	1	649.781	1297.55	2	1297.54	0.0043	0	27.55	12	R	HGDNEWGDVNR	W					Elution from: 50.905 to 50.905 period: 0 experiment: 1 cycles: 1 precIntensity: 70278.0 FinneganScanNumber: 4368 MStype: enumIsNormalMS rawFile: 16H146_5_120M.raw
4	gi|872560961	amino acid ABC transporter substrate-binding protein [Marinovum algicola]	637	35995	102	29	9	6	4225	1	1	1	649.782	1297.55	2	1297.54	0.0053	0	31.26	4.8	R	HGDNEWGDVNR	W					Elution from: 59.395 to 59.395 period: 0 experiment: 1 cycles: 1 precIntensity: 22454.0 FinneganScanNumber: 5279 MStype: enumIsNormalMS rawFile: 16H146_5_120M.raw
4	gi|872560961	amino acid ABC transporter substrate-binding protein [Marinovum algicola]	637	35995	102	29	9	6	7150	1	1	0	968.51	1935.01	2	1935.01	-0.0049	0	46.89	0.71	R	AAFENPGDHVVLPEIISK	E					Elution from: 85.307 to 85.307 period: 0 experiment: 1 cycles: 1 precIntensity: 21639.0 FinneganScanNumber: 7833 MStype: enumIsNormalMS rawFile: 16H146_5_120M.raw
4	gi|872560961	amino acid ABC transporter substrate-binding protein [Marinovum algicola]	637	35995	102	29	9	6	7151	1	1	0	968.51	1935.01	2	1935.01	-0.0039	0	26.6	68	R	AAFENPGDHVVLPEIISK	E					Elution from: 85.403 to 85.403 period: 0 experiment: 1 cycles: 1 precIntensity: 23177.0 FinneganScanNumber: 7842 MStype: enumIsNormalMS rawFile: 16H146_5_120M.raw
4	gi|872560961	amino acid ABC transporter substrate-binding protein [Marinovum algicola]	637	35995	102	29	9	6	7152	2	1	0	646.01	1935.01	3	1935.01	-0.0029	0	23.31	150	R	AAFENPGDHVVLPEIISK	E					Elution from: 84.872 to 84.872 period: 0 experiment: 1 cycles: 1 precIntensity: 19354.0 FinneganScanNumber: 7792 MStype: enumIsNormalMS rawFile: 16H146_5_120M.raw
4	gi|872560961	amino acid ABC transporter substrate-binding protein [Marinovum algicola]	637	35995	102	29	9	6	7153	1	1	0	968.511	1935.01	2	1935.01	-0.002	0	25.87	88	R	AAFENPGDHVVLPEIISK	E					Elution from: 85.490 to 85.490 period: 0 experiment: 1 cycles: 1 precIntensity: 37371.0 FinneganScanNumber: 7850 MStype: enumIsNormalMS rawFile: 16H146_5_120M.raw
4	gi|872560961	amino acid ABC transporter substrate-binding protein [Marinovum algicola]	637	35995	102	29	9	6	7227	1	1	0	988.506	1975	2	1975	0.0018	0	30.74	34	R	GLNAQWTDGGLLYAPPFR	-					Elution from: 116.452 to 116.452 period: 0 experiment: 1 cycles: 1 precIntensity: 604869.0 FinneganScanNumber: 10704 MStype: enumIsNormalMS rawFile: 16H146_5_120M.raw
4	gi|872560961	amino acid ABC transporter substrate-binding protein [Marinovum algicola]	637	35995	102	29	9	6	7228	1	1	0	988.507	1975	2	1975	0.0041	0	67.56	0.0073	R	GLNAQWTDGGLLYAPPFR	-					Elution from: 116.415 to 116.415 period: 0 experiment: 1 cycles: 1 precIntensity: 363825.0 FinneganScanNumber: 10699 MStype: enumIsNormalMS rawFile: 16H146_5_120M.raw
4	gi|872560961	amino acid ABC transporter substrate-binding protein [Marinovum algicola]	637	35995	102	29	9	6	7384	1	1	1	691.041	2070.1	3	2070.1	0.0005	0	22.72	130	R	AVAAAVLNDPTAVEFVPTTGK	T					Elution from: 109.783 to 109.783 period: 0 experiment: 1 cycles: 1 precIntensity: 60446.0 FinneganScanNumber: 10002 MStype: enumIsNormalMS rawFile: 16H146_5_120M.raw
4	gi|872560961	amino acid ABC transporter substrate-binding protein [Marinovum algicola]	637	35995	102	29	9	6	7385	1	1	1	1036.06	2070.1	2	2070.1	0.0008	0	70.29	0.0023	R	AVAAAVLNDPTAVEFVPTTGK	T					Elution from: 113.885 to 113.885 period: 0 experiment: 1 cycles: 1 precIntensity: 93801.0 FinneganScanNumber: 10435 MStype: enumIsNormalMS rawFile: 16H146_5_120M.raw
4	gi|872560961	amino acid ABC transporter substrate-binding protein [Marinovum algicola]	637	35995	102	29	9	6	7386	1	1	1	1036.06	2070.1	2	2070.1	0.001	0	110.91	2.3e-07	R	AVAAAVLNDPTAVEFVPTTGK	T					Elution from: 82.573 to 82.573 period: 0 experiment: 1 cycles: 1 precIntensity: 81509.0 FinneganScanNumber: 7587 MStype: enumIsNormalMS rawFile: 16H146_5_120M.raw
4	gi|872560961	amino acid ABC transporter substrate-binding protein [Marinovum algicola]	637	35995	102	29	9	6	7387	1	1	1	691.041	2070.1	3	2070.1	0.001	0	61.3	0.021	R	AVAAAVLNDPTAVEFVPTTGK	T					Elution from: 109.837 to 109.837 period: 0 experiment: 1 cycles: 1 precIntensity: 101732.0 FinneganScanNumber: 10007 MStype: enumIsNormalMS rawFile: 16H146_5_120M.raw
4	gi|872560961	amino acid ABC transporter substrate-binding protein [Marinovum algicola]	637	35995	102	29	9	6	7388	1	1	1	1036.06	2070.1	2	2070.1	0.0013	0	96.15	6.8e-06	R	AVAAAVLNDPTAVEFVPTTGK	T					Elution from: 109.683 to 109.683 period: 0 experiment: 1 cycles: 1 precIntensity: 70599.0 FinneganScanNumber: 9991 MStype: enumIsNormalMS rawFile: 16H146_5_120M.raw
4	gi|872560961	amino acid ABC transporter substrate-binding protein [Marinovum algicola]	637	35995	102	29	9	6	7389	1	1	1	1036.06	2070.1	2	2070.1	0.0016	0	99.43	3.2e-06	R	AVAAAVLNDPTAVEFVPTTGK	T					Elution from: 82.632 to 82.632 period: 0 experiment: 1 cycles: 1 precIntensity: 191169.0 FinneganScanNumber: 7592 MStype: enumIsNormalMS rawFile: 16H146_5_120M.raw
4	gi|872560961	amino acid ABC transporter substrate-binding protein [Marinovum algicola]	637	35995	102	29	9	6	7390	1	1	1	1036.06	2070.1	2	2070.1	0.0018	0	94.59	9.8e-06	R	AVAAAVLNDPTAVEFVPTTGK	T					Elution from: 109.728 to 109.728 period: 0 experiment: 1 cycles: 1 precIntensity: 226002.0 FinneganScanNumber: 9996 MStype: enumIsNormalMS rawFile: 16H146_5_120M.raw
4	gi|872560961	amino acid ABC transporter substrate-binding protein [Marinovum algicola]	637	35995	102	29	9	6	7391	1	1	1	1036.06	2070.1	2	2070.1	0.0019	0	92.13	1.7e-05	R	AVAAAVLNDPTAVEFVPTTGK	T					Elution from: 111.750 to 111.750 period: 0 experiment: 1 cycles: 1 precIntensity: 476237.0 FinneganScanNumber: 10205 MStype: enumIsNormalMS rawFile: 16H146_5_120M.raw
4	gi|872560961	amino acid ABC transporter substrate-binding protein [Marinovum algicola]	637	35995	102	29	9	6	7392	1	1	1	1036.06	2070.1	2	2070.1	0.0023	0	117.68	4.9e-08	R	AVAAAVLNDPTAVEFVPTTGK	T					Elution from: 111.805 to 111.805 period: 0 experiment: 1 cycles: 1 precIntensity: 411569.0 FinneganScanNumber: 10211 MStype: enumIsNormalMS rawFile: 16H146_5_120M.raw
4	gi|872560961	amino acid ABC transporter substrate-binding protein [Marinovum algicola]	637	35995	102	29	9	6	7393	1	1	1	1036.06	2070.1	2	2070.1	0.0048	0	27.07	55	R	AVAAAVLNDPTAVEFVPTTGK	T					Elution from: 107.352 to 107.352 period: 0 experiment: 1 cycles: 1 precIntensity: 18629.0 FinneganScanNumber: 9763 MStype: enumIsNormalMS rawFile: 16H146_5_120M.raw
4	gi|872560961	amino acid ABC transporter substrate-binding protein [Marinovum algicola]	637	35995	102	29	9	6	8217	1	1	1	1400.66	4198.96	3	4198.96	0.0005	0	55.66	0.079	K	NNISYEPVPIETNAEAQPLYLEGGCDVYTTDASGLAATR	A					Elution from: 112.570 to 112.570 period: 0 experiment: 1 cycles: 1 precIntensity: 77962.0 FinneganScanNumber: 10297 MStype: enumIsNormalMS rawFile: 16H146_5_120M.raw
4	gi|872560961	amino acid ABC transporter substrate-binding protein [Marinovum algicola]	637	35995	102	29	9	6	8218	1	1	1	1401	4199.97	3	4199.95	0.0206	0	112.67	1.6e-07	K	NNISYEPVPIETNAEAQPLYLEGGCDVYTTDASGLAATR	A	Deamidated (NQ)	0.000000000000000010000000000000000000000.0			Elution from: 112.637 to 112.637 period: 0 experiment: 1 cycles: 1 precIntensity: 75646.0 FinneganScanNumber: 10304 MStype: enumIsNormalMS rawFile: 16H146_5_120M.raw
5	gi|872562334	molecular chaperone GroEL [Marinovum algicola]	613	58168	29	11	11	4	1596	1	1	0	428.274	854.534	2	854.534	0.0002	0	47.83	0.12	K	LAGGVAVIR	V					Elution from: 32.375 to 32.375 period: 0 experiment: 1 cycles: 1 precIntensity: 188896.0 FinneganScanNumber: 2427 MStype: enumIsNormalMS rawFile: 16H146_5_120M.raw
5	gi|872562334	molecular chaperone GroEL [Marinovum algicola]	613	58168	29	11	11	4	1597	2	1	0	428.274	854.534	2	854.534	0.0005	0	35.87	1.9	K	LAGGVAVIR	V					Elution from: 32.432 to 32.432 period: 0 experiment: 1 cycles: 1 precIntensity: 160484.0 FinneganScanNumber: 2433 MStype: enumIsNormalMS rawFile: 16H146_5_120M.raw
5	gi|872562334	molecular chaperone GroEL [Marinovum algicola]	613	58168	29	11	11	4	2228	2	1	0	487.748	973.481	2	973.483	-0.0017	0	38.18	3.7	R	VDDALNATR	A					Elution from: 18.977 to 18.977 period: 0 experiment: 1 cycles: 1 precIntensity: 53514.0 FinneganScanNumber: 1112 MStype: enumIsNormalMS rawFile: 16H146_5_120M.raw
5	gi|872562334	molecular chaperone GroEL [Marinovum algicola]	613	58168	29	11	11	4	2230	1	1	0	487.748	973.482	2	973.483	-0.0011	0	45.6	0.62	R	VDDALNATR	A					Elution from: 17.183 to 17.183 period: 0 experiment: 1 cycles: 1 precIntensity: 211349.0 FinneganScanNumber: 939 MStype: enumIsNormalMS rawFile: 16H146_5_120M.raw
5	gi|872562334	molecular chaperone GroEL [Marinovum algicola]	613	58168	29	11	11	4	2231	3	1	0	487.748	973.482	2	973.483	-0.0007	0	47.64	0.46	R	VDDALNATR	A					Elution from: 17.223 to 17.223 period: 0 experiment: 1 cycles: 1 precIntensity: 230234.0 FinneganScanNumber: 943 MStype: enumIsNormalMS rawFile: 16H146_5_120M.raw
5	gi|872562334	molecular chaperone GroEL [Marinovum algicola]	613	58168	29	11	11	4	2353	1	1	0	500.294	998.573	2	998.576	-0.0027	0	29.48	23	K	GVNILADAVK	V					Elution from: 58.218 to 58.218 period: 0 experiment: 1 cycles: 1 precIntensity: 27925.0 FinneganScanNumber: 5152 MStype: enumIsNormalMS rawFile: 16H146_5_120M.raw
5	gi|872562334	molecular chaperone GroEL [Marinovum algicola]	613	58168	29	11	11	4	2355	1	1	0	500.295	998.576	2	998.576	-0.0001	0	37.74	3.4	K	GVNILADAVK	V					Elution from: 109.927 to 109.927 period: 0 experiment: 1 cycles: 1 precIntensity: 45472.0 FinneganScanNumber: 10016 MStype: enumIsNormalMS rawFile: 16H146_5_120M.raw
5	gi|872562334	molecular chaperone GroEL [Marinovum algicola]	613	58168	29	11	11	4	4620	1	1	1	674.33	1346.65	2	1346.65	-0.0042	0	27.33	50	K	EIGQQIADAMQK	V	Oxidation (M)	0.000000000200.0			Elution from: 29.103 to 29.103 period: 0 experiment: 1 cycles: 1 precIntensity: 13821.0 FinneganScanNumber: 2095 MStype: enumIsNormalMS rawFile: 16H146_5_120M.raw
5	gi|872562334	molecular chaperone GroEL [Marinovum algicola]	613	58168	29	11	11	4	4939	1	1	0	694.357	1386.7	2	1386.7	0	0	49.82	0.33	K	VGNEGVITVEENK	G					Elution from: 31.225 to 31.225 period: 0 experiment: 1 cycles: 1 precIntensity: 35808.0 FinneganScanNumber: 2308 MStype: enumIsNormalMS rawFile: 16H146_5_120M.raw
5	gi|872562334	molecular chaperone GroEL [Marinovum algicola]	613	58168	29	11	11	4	4940	1	1	0	694.358	1386.7	2	1386.7	0.0016	0	49.96	0.27	K	VGNEGVITVEENK	G					Elution from: 31.142 to 31.142 period: 0 experiment: 1 cycles: 1 precIntensity: 38980.0 FinneganScanNumber: 2300 MStype: enumIsNormalMS rawFile: 16H146_5_120M.raw
5	gi|872562334	molecular chaperone GroEL [Marinovum algicola]	613	58168	29	11	11	4	5013	1	1	0	698.347	1394.68	2	1394.68	0.0002	0	40.42	2.3	K	LESVTMDMLGTAK	K					Elution from: 68.995 to 68.995 period: 0 experiment: 1 cycles: 1 precIntensity: 90779.0 FinneganScanNumber: 6290 MStype: enumIsNormalMS rawFile: 16H146_5_120M.raw
5	gi|872562334	molecular chaperone GroEL [Marinovum algicola]	613	58168	29	11	11	4	5014	1	1	0	698.347	1394.68	2	1394.68	0.0005	0	41.34	1.7	K	LESVTMDMLGTAK	K					Elution from: 69.053 to 69.053 period: 0 experiment: 1 cycles: 1 precIntensity: 102458.0 FinneganScanNumber: 6296 MStype: enumIsNormalMS rawFile: 16H146_5_120M.raw
5	gi|872562334	molecular chaperone GroEL [Marinovum algicola]	613	58168	29	11	11	4	5247	1	1	0	714.342	1426.67	2	1426.67	0.0016	0	64.3	0.0077	K	LESVTMDMLGTAK	K	2 Oxidation (M)	0.0000020200000.0			Elution from: 31.042 to 31.042 period: 0 experiment: 1 cycles: 1 precIntensity: 23029.0 FinneganScanNumber: 2290 MStype: enumIsNormalMS rawFile: 16H146_5_120M.raw
5	gi|872562334	molecular chaperone GroEL [Marinovum algicola]	613	58168	29	11	11	4	5537	1	1	0	745.862	1489.71	2	1489.71	0.0009	0	20.01	260	R	GYLSPYFVTNSDK	M					Elution from: 70.103 to 70.103 period: 0 experiment: 1 cycles: 1 precIntensity: 107415.0 FinneganScanNumber: 6401 MStype: enumIsNormalMS rawFile: 16H146_5_120M.raw
5	gi|872562334	molecular chaperone GroEL [Marinovum algicola]	613	58168	29	11	11	4	5538	1	1	0	745.862	1489.71	2	1489.71	0.0015	0	28.2	38	R	GYLSPYFVTNSDK	M					Elution from: 70.057 to 70.057 period: 0 experiment: 1 cycles: 1 precIntensity: 38838.0 FinneganScanNumber: 6396 MStype: enumIsNormalMS rawFile: 16H146_5_120M.raw
5	gi|872562334	molecular chaperone GroEL [Marinovum algicola]	613	58168	29	11	11	4	5646	1	1	0	757.895	1513.77	2	1513.77	0.0011	0	39.18	3.4	R	QIAENAGVDGSVVAGK	V					Elution from: 31.792 to 31.792 period: 0 experiment: 1 cycles: 1 precIntensity: 31591.0 FinneganScanNumber: 2365 MStype: enumIsNormalMS rawFile: 16H146_5_120M.raw
5	gi|872562334	molecular chaperone GroEL [Marinovum algicola]	613	58168	29	11	11	4	5647	1	1	0	757.895	1513.78	2	1513.77	0.0017	0	29.03	35	R	QIAENAGVDGSVVAGK	V					Elution from: 31.850 to 31.850 period: 0 experiment: 1 cycles: 1 precIntensity: 16665.0 FinneganScanNumber: 2370 MStype: enumIsNormalMS rawFile: 16H146_5_120M.raw
5	gi|872562334	molecular chaperone GroEL [Marinovum algicola]	613	58168	29	11	11	4	6487	1	1	0	864.39	1726.77	2	1726.76	0.0008	1	73.91	0.00058	R	NQIEETTSDYDREK	L					Elution from: 28.178 to 28.178 period: 0 experiment: 1 cycles: 1 precIntensity: 65823.0 FinneganScanNumber: 2005 MStype: enumIsNormalMS rawFile: 16H146_5_120M.raw
5	gi|872562334	molecular chaperone GroEL [Marinovum algicola]	613	58168	29	11	11	4	6489	1	1	0	864.39	1726.77	2	1726.76	0.0019	1	51.87	0.09	R	NQIEETTSDYDREK	L					Elution from: 30.227 to 30.227 period: 0 experiment: 1 cycles: 1 precIntensity: 21258.0 FinneganScanNumber: 2210 MStype: enumIsNormalMS rawFile: 16H146_5_120M.raw
5	gi|872562334	molecular chaperone GroEL [Marinovum algicola]	613	58168	29	11	11	4	6490	1	1	0	864.39	1726.77	2	1726.76	0.002	1	61.85	0.009	R	NQIEETTSDYDREK	L					Elution from: 28.132 to 28.132 period: 0 experiment: 1 cycles: 1 precIntensity: 33394.0 FinneganScanNumber: 2001 MStype: enumIsNormalMS rawFile: 16H146_5_120M.raw
5	gi|872562334	molecular chaperone GroEL [Marinovum algicola]	613	58168	29	11	11	4	7423	1	1	0	1052.53	2103.05	2	2103.04	0.0011	0	77.97	0.00062	R	TNDEAGDGTTTATVLAQAIVR	E					Elution from: 82.983 to 82.983 period: 0 experiment: 1 cycles: 1 precIntensity: 25754.0 FinneganScanNumber: 7624 MStype: enumIsNormalMS rawFile: 16H146_5_120M.raw
5	gi|872562334	molecular chaperone GroEL [Marinovum algicola]	613	58168	29	11	11	4	7424	1	1	0	702.023	2103.05	3	2103.04	0.0025	0	44.33	1.5	R	TNDEAGDGTTTATVLAQAIVR	E					Elution from: 112.907 to 112.907 period: 0 experiment: 1 cycles: 1 precIntensity: 64832.0 FinneganScanNumber: 10333 MStype: enumIsNormalMS rawFile: 16H146_5_120M.raw
5	gi|872562334	molecular chaperone GroEL [Marinovum algicola]	613	58168	29	11	11	4	7425	1	1	0	1052.53	2103.05	2	2103.04	0.0035	0	104.8	1.3e-06	R	TNDEAGDGTTTATVLAQAIVR	E					Elution from: 113.895 to 113.895 period: 0 experiment: 1 cycles: 1 precIntensity: 71003.0 FinneganScanNumber: 10436 MStype: enumIsNormalMS rawFile: 16H146_5_120M.raw
5	gi|872562334	molecular chaperone GroEL [Marinovum algicola]	613	58168	29	11	11	4	7485	1	1	1	1065.05	2128.08	2	2128.08	0.0001	0	72.04	0.0024	K	TLEGLTGENNDQNVGISIVR	K					Elution from: 109.155 to 109.155 period: 0 experiment: 1 cycles: 1 precIntensity: 62839.0 FinneganScanNumber: 9937 MStype: enumIsNormalMS rawFile: 16H146_5_120M.raw
5	gi|872562334	molecular chaperone GroEL [Marinovum algicola]	613	58168	29	11	11	4	7486	1	1	1	1065.05	2128.08	2	2128.08	0.0003	0	93.73	1.6e-05	K	TLEGLTGENNDQNVGISIVR	K					Elution from: 106.995 to 106.995 period: 0 experiment: 1 cycles: 1 precIntensity: 287122.0 FinneganScanNumber: 9731 MStype: enumIsNormalMS rawFile: 16H146_5_120M.raw
5	gi|872562334	molecular chaperone GroEL [Marinovum algicola]	613	58168	29	11	11	4	7487	1	1	1	1065.05	2128.08	2	2128.08	0.0007	0	69.49	0.0042	K	TLEGLTGENNDQNVGISIVR	K					Elution from: 107.058 to 107.058 period: 0 experiment: 1 cycles: 1 precIntensity: 296771.0 FinneganScanNumber: 9737 MStype: enumIsNormalMS rawFile: 16H146_5_120M.raw
5	gi|872562334	molecular chaperone GroEL [Marinovum algicola]	613	58168	29	11	11	4	7488	1	1	1	1065.05	2128.08	2	2128.08	0.0008	0	82.05	0.00024	K	TLEGLTGENNDQNVGISIVR	K					Elution from: 74.590 to 74.590 period: 0 experiment: 1 cycles: 1 precIntensity: 62042.0 FinneganScanNumber: 6846 MStype: enumIsNormalMS rawFile: 16H146_5_120M.raw
5	gi|872562334	molecular chaperone GroEL [Marinovum algicola]	613	58168	29	11	11	4	7489	1	1	1	1065.05	2128.08	2	2128.08	0.001	0	84.79	0.00012	K	TLEGLTGENNDQNVGISIVR	K					Elution from: 74.552 to 74.552 period: 0 experiment: 1 cycles: 1 precIntensity: 36671.0 FinneganScanNumber: 6842 MStype: enumIsNormalMS rawFile: 16H146_5_120M.raw
5	gi|872562334	molecular chaperone GroEL [Marinovum algicola]	613	58168	29	11	11	4	7490	1	1	1	1065.05	2128.08	2	2128.08	0.0024	0	72.37	0.0022	K	TLEGLTGENNDQNVGISIVR	K					Elution from: 109.082 to 109.082 period: 0 experiment: 1 cycles: 1 precIntensity: 91688.0 FinneganScanNumber: 9930 MStype: enumIsNormalMS rawFile: 16H146_5_120M.raw
6	gi|872562259	ATP synthase subunit beta [Marinovum algicola]	549	50449	34	16	8	6	2240	3	1	0	488.284	974.553	2	974.555	-0.0023	0	39.34	2	K	IGLFGGAGVGK	T					Elution from: 57.103 to 57.103 period: 0 experiment: 1 cycles: 1 precIntensity: 42126.0 FinneganScanNumber: 5033 MStype: enumIsNormalMS rawFile: 16H146_5_120M.raw
6	gi|872562259	ATP synthase subunit beta [Marinovum algicola]	549	50449	34	16	8	6	2241	1	1	0	488.284	974.553	2	974.555	-0.0014	0	47.52	0.43	K	IGLFGGAGVGK	T					Elution from: 57.165 to 57.165 period: 0 experiment: 1 cycles: 1 precIntensity: 61151.0 FinneganScanNumber: 5039 MStype: enumIsNormalMS rawFile: 16H146_5_120M.raw
6	gi|872562259	ATP synthase subunit beta [Marinovum algicola]	549	50449	34	16	8	6	2242	2	1	0	488.284	974.554	2	974.555	-0.0012	0	40.83	2	K	IGLFGGAGVGK	T					Elution from: 59.322 to 59.322 period: 0 experiment: 1 cycles: 1 precIntensity: 63668.0 FinneganScanNumber: 5271 MStype: enumIsNormalMS rawFile: 16H146_5_120M.raw
6	gi|872562259	ATP synthase subunit beta [Marinovum algicola]	549	50449	34	16	8	6	2797	4	1	0	544.821	1087.63	2	1087.63	-0.0001	0	22.44	110	K	VVDLLAPYAK	G					Elution from: 69.170 to 69.170 period: 0 experiment: 1 cycles: 1 precIntensity: 224156.0 FinneganScanNumber: 6308 MStype: enumIsNormalMS rawFile: 16H146_5_120M.raw
6	gi|872562259	ATP synthase subunit beta [Marinovum algicola]	549	50449	34	16	8	6	2798	2	1	0	544.821	1087.63	2	1087.63	0.0002	0	24.94	59	K	VVDLLAPYAK	G					Elution from: 70.462 to 70.462 period: 0 experiment: 1 cycles: 1 precIntensity: 54950.0 FinneganScanNumber: 6439 MStype: enumIsNormalMS rawFile: 16H146_5_120M.raw
6	gi|872562259	ATP synthase subunit beta [Marinovum algicola]	549	50449	34	16	8	6	3675	1	1	1	621.843	1241.67	2	1241.67	-0.0003	0	78.42	0.00033	K	VASDVQNILQR	Y					Elution from: 49.492 to 49.492 period: 0 experiment: 1 cycles: 1 precIntensity: 75043.0 FinneganScanNumber: 4217 MStype: enumIsNormalMS rawFile: 16H146_5_120M.raw
6	gi|872562259	ATP synthase subunit beta [Marinovum algicola]	549	50449	34	16	8	6	3676	1	1	1	621.844	1241.67	2	1241.67	-0.0002	0	46.28	0.54	K	VASDVQNILQR	Y					Elution from: 51.818 to 51.818 period: 0 experiment: 1 cycles: 1 precIntensity: 37951.0 FinneganScanNumber: 4466 MStype: enumIsNormalMS rawFile: 16H146_5_120M.raw
6	gi|872562259	ATP synthase subunit beta [Marinovum algicola]	549	50449	34	16	8	6	3677	2	1	1	621.844	1241.67	2	1241.67	0.0003	0	25.19	70	K	VASDVQNILQR	Y					Elution from: 53.240 to 53.240 period: 0 experiment: 1 cycles: 1 precIntensity: 27737.0 FinneganScanNumber: 4615 MStype: enumIsNormalMS rawFile: 16H146_5_120M.raw
6	gi|872562259	ATP synthase subunit beta [Marinovum algicola]	549	50449	34	16	8	6	3678	1	1	1	621.844	1241.67	2	1241.67	0.0004	0	65.33	0.0066	K	VASDVQNILQR	Y					Elution from: 49.425 to 49.425 period: 0 experiment: 1 cycles: 1 precIntensity: 57880.0 FinneganScanNumber: 4210 MStype: enumIsNormalMS rawFile: 16H146_5_120M.raw
6	gi|872562259	ATP synthase subunit beta [Marinovum algicola]	549	50449	34	16	8	6	3932	1	1	0	638.833	1275.65	2	1275.65	0.0022	0	56.95	0.081	R	TIAMDATEGLVR	G					Elution from: 58.430 to 58.430 period: 0 experiment: 1 cycles: 1 precIntensity: 77809.0 FinneganScanNumber: 5175 MStype: enumIsNormalMS rawFile: 16H146_5_120M.raw
6	gi|872562259	ATP synthase subunit beta [Marinovum algicola]	549	50449	34	16	8	6	3933	1	1	0	638.833	1275.65	2	1275.65	0.0029	0	61.78	0.027	R	TIAMDATEGLVR	G					Elution from: 58.477 to 58.477 period: 0 experiment: 1 cycles: 1 precIntensity: 76279.0 FinneganScanNumber: 5181 MStype: enumIsNormalMS rawFile: 16H146_5_120M.raw
6	gi|872562259	ATP synthase subunit beta [Marinovum algicola]	549	50449	34	16	8	6	7248	1	1	0	995.509	1989	2	1989.01	-0.0014	0	63.5	0.019	R	AISELGIYPAVDPLDSSSR	L					Elution from: 90.937 to 90.937 period: 0 experiment: 1 cycles: 1 precIntensity: 28484.0 FinneganScanNumber: 8331 MStype: enumIsNormalMS rawFile: 16H146_5_120M.raw
6	gi|872562259	ATP synthase subunit beta [Marinovum algicola]	549	50449	34	16	8	6	7249	1	1	0	995.511	1989.01	2	1989.01	0.0024	0	52.48	0.23	R	AISELGIYPAVDPLDSSSR	L					Elution from: 90.990 to 90.990 period: 0 experiment: 1 cycles: 1 precIntensity: 34773.0 FinneganScanNumber: 8336 MStype: enumIsNormalMS rawFile: 16H146_5_120M.raw
6	gi|872562259	ATP synthase subunit beta [Marinovum algicola]	549	50449	34	16	8	6	7471	1	1	1	1063.04	2124.07	2	2124.07	0.0026	0	99.33	4.5e-06	R	ILNVVGEPVDEGGPVSASETR	A					Elution from: 63.040 to 63.040 period: 0 experiment: 1 cycles: 1 precIntensity: 60208.0 FinneganScanNumber: 5673 MStype: enumIsNormalMS rawFile: 16H146_5_120M.raw
6	gi|872562259	ATP synthase subunit beta [Marinovum algicola]	549	50449	34	16	8	6	7472	1	1	1	1063.04	2124.07	2	2124.07	0.0034	0	89.52	4.2e-05	R	ILNVVGEPVDEGGPVSASETR	A					Elution from: 63.102 to 63.102 period: 0 experiment: 1 cycles: 1 precIntensity: 65293.0 FinneganScanNumber: 5679 MStype: enumIsNormalMS rawFile: 16H146_5_120M.raw
6	gi|872562259	ATP synthase subunit beta [Marinovum algicola]	549	50449	34	16	8	6	7552	1	1	1	1091.06	2180.11	2	2180.11	-0.0016	0	55.66	0.11	R	GQEVVDTDGPISVPVGNATLGR	I					Elution from: 80.898 to 80.898 period: 0 experiment: 1 cycles: 1 precIntensity: 12691.0 FinneganScanNumber: 7434 MStype: enumIsNormalMS rawFile: 16H146_5_120M.raw
6	gi|872562259	ATP synthase subunit beta [Marinovum algicola]	549	50449	34	16	8	6	7553	1	1	1	727.711	2180.11	3	2180.11	0.0024	0	31.52	26	R	GQEVVDTDGPISVPVGNATLGR	I					Elution from: 72.810 to 72.810 period: 0 experiment: 1 cycles: 1 precIntensity: 65029.0 FinneganScanNumber: 6672 MStype: enumIsNormalMS rawFile: 16H146_5_120M.raw
6	gi|872562259	ATP synthase subunit beta [Marinovum algicola]	549	50449	34	16	8	6	7554	2	1	1	1091.06	2180.11	2	2180.11	0.0038	0	66.8	0.0075	R	GQEVVDTDGPISVPVGNATLGR	I					Elution from: 72.545 to 72.545 period: 0 experiment: 1 cycles: 1 precIntensity: 21843.0 FinneganScanNumber: 6644 MStype: enumIsNormalMS rawFile: 16H146_5_120M.raw
6	gi|872562259	ATP synthase subunit beta [Marinovum algicola]	549	50449	34	16	8	6	7640	1	1	0	746.028	2235.06	3	2235.07	-0.003	0	26.58	78	R	IPSAVGYQPTLATDMGAMQER	I					Elution from: 109.537 to 109.537 period: 0 experiment: 1 cycles: 1 precIntensity: 66617.0 FinneganScanNumber: 9975 MStype: enumIsNormalMS rawFile: 16H146_5_120M.raw
6	gi|872562259	ATP synthase subunit beta [Marinovum algicola]	549	50449	34	16	8	6	7641	2	1	0	746.029	2235.06	3	2235.07	-0.0027	0	21.97	220	R	IPSAVGYQPTLATDMGAMQER	I					Elution from: 109.570 to 109.570 period: 0 experiment: 1 cycles: 1 precIntensity: 85770.0 FinneganScanNumber: 9979 MStype: enumIsNormalMS rawFile: 16H146_5_120M.raw
6	gi|872562259	ATP synthase subunit beta [Marinovum algicola]	549	50449	34	16	8	6	7642	1	1	0	1118.54	2235.07	2	2235.07	0.0018	0	79	0.00044	R	IPSAVGYQPTLATDMGAMQER	I					Elution from: 109.498 to 109.498 period: 0 experiment: 1 cycles: 1 precIntensity: 107323.0 FinneganScanNumber: 9971 MStype: enumIsNormalMS rawFile: 16H146_5_120M.raw
6	gi|872562259	ATP synthase subunit beta [Marinovum algicola]	549	50449	34	16	8	6	7643	1	1	0	1118.54	2235.07	2	2235.07	0.0018	0	106.86	7.3e-07	R	IPSAVGYQPTLATDMGAMQER	I					Elution from: 79.817 to 79.817 period: 0 experiment: 1 cycles: 1 precIntensity: 24100.0 FinneganScanNumber: 7335 MStype: enumIsNormalMS rawFile: 16H146_5_120M.raw
6	gi|872562259	ATP synthase subunit beta [Marinovum algicola]	549	50449	34	16	8	6	7644	1	1	0	1118.54	2235.07	2	2235.07	0.003	0	54.23	0.13	R	IPSAVGYQPTLATDMGAMQER	I					Elution from: 79.885 to 79.885 period: 0 experiment: 1 cycles: 1 precIntensity: 51888.0 FinneganScanNumber: 7341 MStype: enumIsNormalMS rawFile: 16H146_5_120M.raw
6	gi|872562259	ATP synthase subunit beta [Marinovum algicola]	549	50449	34	16	8	6	7645	1	1	0	1118.54	2235.07	2	2235.07	0.0031	0	66.05	0.0087	R	IPSAVGYQPTLATDMGAMQER	I					Elution from: 109.438 to 109.438 period: 0 experiment: 1 cycles: 1 precIntensity: 63432.0 FinneganScanNumber: 9965 MStype: enumIsNormalMS rawFile: 16H146_5_120M.raw
6	gi|872562259	ATP synthase subunit beta [Marinovum algicola]	549	50449	34	16	8	6	7646	2	1	0	1118.54	2235.07	2	2235.07	0.0035	0	89.53	4.2e-05	R	IPSAVGYQPTLATDMGAMQER	I					Elution from: 79.750 to 79.750 period: 0 experiment: 1 cycles: 1 precIntensity: 24423.0 FinneganScanNumber: 7329 MStype: enumIsNormalMS rawFile: 16H146_5_120M.raw
6	gi|872562259	ATP synthase subunit beta [Marinovum algicola]	549	50449	34	16	8	6	7663	1	1	0	1126.54	2251.06	2	2251.06	0.001	0	60.2	0.032	R	IPSAVGYQPTLATDMGAMQER	I	Oxidation (M)	0.000000000000000002000.0			Elution from: 67.185 to 67.185 period: 0 experiment: 1 cycles: 1 precIntensity: 33470.0 FinneganScanNumber: 6105 MStype: enumIsNormalMS rawFile: 16H146_5_120M.raw
6	gi|872562259	ATP synthase subunit beta [Marinovum algicola]	549	50449	34	16	8	6	7664	1	1	0	1126.54	2251.06	2	2251.06	0.0021	0	57.73	0.056	R	IPSAVGYQPTLATDMGAMQER	I	Oxidation (M)	0.000000000000002000000.0			Elution from: 62.743 to 62.743 period: 0 experiment: 1 cycles: 1 precIntensity: 19149.0 FinneganScanNumber: 5644 MStype: enumIsNormalMS rawFile: 16H146_5_120M.raw
6	gi|872562259	ATP synthase subunit beta [Marinovum algicola]	549	50449	34	16	8	6	7665	1	1	0	1126.54	2251.06	2	2251.06	0.0025	0	62.7	0.018	R	IPSAVGYQPTLATDMGAMQER	I	Oxidation (M)	0.000000000000002000000.0			Elution from: 62.703 to 62.703 period: 0 experiment: 1 cycles: 1 precIntensity: 32304.0 FinneganScanNumber: 5640 MStype: enumIsNormalMS rawFile: 16H146_5_120M.raw
6	gi|872562259	ATP synthase subunit beta [Marinovum algicola]	549	50449	34	16	8	6	7666	1	1	0	1126.54	2251.06	2	2251.06	0.0029	0	58.26	0.049	R	IPSAVGYQPTLATDMGAMQER	I	Oxidation (M)	0.000000000000002000000.0			Elution from: 62.592 to 62.592 period: 0 experiment: 1 cycles: 1 precIntensity: 23531.0 FinneganScanNumber: 5628 MStype: enumIsNormalMS rawFile: 16H146_5_120M.raw
6	gi|872562259	ATP synthase subunit beta [Marinovum algicola]	549	50449	34	16	8	6	7667	2	1	0	751.362	2251.06	3	2251.06	0.0034	0	41.61	2.4	R	IPSAVGYQPTLATDMGAMQER	I	Oxidation (M)	0.000000000000000002000.0			Elution from: 67.327 to 67.327 period: 0 experiment: 1 cycles: 1 precIntensity: 30770.0 FinneganScanNumber: 6119 MStype: enumIsNormalMS rawFile: 16H146_5_120M.raw
6	gi|872562259	ATP synthase subunit beta [Marinovum algicola]	549	50449	34	16	8	6	7668	1	1	0	1126.54	2251.07	2	2251.06	0.0039	0	53.61	0.15	R	IPSAVGYQPTLATDMGAMQER	I	Oxidation (M)	0.000000000000000002000.0			Elution from: 67.145 to 67.145 period: 0 experiment: 1 cycles: 1 precIntensity: 38777.0 FinneganScanNumber: 6101 MStype: enumIsNormalMS rawFile: 16H146_5_120M.raw
6	gi|872562259	ATP synthase subunit beta [Marinovum algicola]	549	50449	34	16	8	6	7684	1	1	0	756.692	2267.06	3	2267.06	-0.0009	0	27.05	58	R	IPSAVGYQPTLATDMGAMQER	I	2 Oxidation (M)	0.000000000000002002000.0			Elution from: 54.190 to 54.190 period: 0 experiment: 1 cycles: 1 precIntensity: 37765.0 FinneganScanNumber: 4723 MStype: enumIsNormalMS rawFile: 16H146_5_120M.raw
6	gi|872562259	ATP synthase subunit beta [Marinovum algicola]	549	50449	34	16	8	6	7685	2	1	0	1134.54	2267.06	2	2267.06	0.0014	0	70.03	0.003	R	IPSAVGYQPTLATDMGAMQER	I	2 Oxidation (M)	0.000000000000002002000.0			Elution from: 54.008 to 54.008 period: 0 experiment: 1 cycles: 1 precIntensity: 55592.0 FinneganScanNumber: 4704 MStype: enumIsNormalMS rawFile: 16H146_5_120M.raw
6	gi|872562259	ATP synthase subunit beta [Marinovum algicola]	549	50449	34	16	8	6	7686	2	1	0	1134.54	2267.06	2	2267.06	0.006	0	63.27	0.014	R	IPSAVGYQPTLATDMGAMQER	I	2 Oxidation (M)	0.000000000000002002000.0			Elution from: 54.067 to 54.067 period: 0 experiment: 1 cycles: 1 precIntensity: 67051.0 FinneganScanNumber: 4710 MStype: enumIsNormalMS rawFile: 16H146_5_120M.raw
7	gi|872596299	sugar ABC transporter substrate-binding protein [Marinovum algicola]	514	47672	29	18	7	5	2886	1	1	0	555.285	1108.55	2	1108.56	-0.0005	0	35.97	6	K	QFIEWATSK	E					Elution from: 113.840 to 113.840 period: 0 experiment: 1 cycles: 1 precIntensity: 55925.0 FinneganScanNumber: 10430 MStype: enumIsNormalMS rawFile: 16H146_5_120M.raw
7	gi|872596299	sugar ABC transporter substrate-binding protein [Marinovum algicola]	514	47672	29	18	7	5	2887	1	1	0	555.285	1108.56	2	1108.56	-0.0002	0	32.69	13	K	QFIEWATSK	E					Elution from: 60.380 to 60.380 period: 0 experiment: 1 cycles: 1 precIntensity: 42492.0 FinneganScanNumber: 5384 MStype: enumIsNormalMS rawFile: 16H146_5_120M.raw
7	gi|872596299	sugar ABC transporter substrate-binding protein [Marinovum algicola]	514	47672	29	18	7	5	2889	1	1	0	555.286	1108.56	2	1108.56	0.0013	0	35.83	6.6	K	QFIEWATSK	E					Elution from: 113.782 to 113.782 period: 0 experiment: 1 cycles: 1 precIntensity: 44371.0 FinneganScanNumber: 10424 MStype: enumIsNormalMS rawFile: 16H146_5_120M.raw
7	gi|872596299	sugar ABC transporter substrate-binding protein [Marinovum algicola]	514	47672	29	18	7	5	3925	1	1	1	638.315	1274.62	2	1274.62	-0.0015	0	91.64	2e-05	K	MTLDSINAADPK	N					Elution from: 46.395 to 46.395 period: 0 experiment: 1 cycles: 1 precIntensity: 141410.0 FinneganScanNumber: 3893 MStype: enumIsNormalMS rawFile: 16H146_5_120M.raw
7	gi|872596299	sugar ABC transporter substrate-binding protein [Marinovum algicola]	514	47672	29	18	7	5	3926	1	1	1	638.316	1274.62	2	1274.62	-0.0008	0	75.17	0.00069	K	MTLDSINAADPK	N					Elution from: 46.447 to 46.447 period: 0 experiment: 1 cycles: 1 precIntensity: 186933.0 FinneganScanNumber: 3899 MStype: enumIsNormalMS rawFile: 16H146_5_120M.raw
7	gi|872596299	sugar ABC transporter substrate-binding protein [Marinovum algicola]	514	47672	29	18	7	5	4556	1	1	1	667.782	1333.55	2	1333.55	-0.001	0	31.15	2.6	R	MQGYTDDFTEK	T					Elution from: 40.508 to 40.508 period: 0 experiment: 1 cycles: 1 precIntensity: 59051.0 FinneganScanNumber: 3257 MStype: enumIsNormalMS rawFile: 16H146_5_120M.raw
7	gi|872596299	sugar ABC transporter substrate-binding protein [Marinovum algicola]	514	47672	29	18	7	5	4557	1	1	1	667.782	1333.55	2	1333.55	-0.0001	0	25.96	8.1	R	MQGYTDDFTEK	T					Elution from: 42.750 to 42.750 period: 0 experiment: 1 cycles: 1 precIntensity: 39043.0 FinneganScanNumber: 3503 MStype: enumIsNormalMS rawFile: 16H146_5_120M.raw
7	gi|872596299	sugar ABC transporter substrate-binding protein [Marinovum algicola]	514	47672	29	18	7	5	4558	1	1	1	667.783	1333.55	2	1333.55	0.0021	0	48.23	0.058	R	MQGYTDDFTEK	T					Elution from: 39.327 to 39.327 period: 0 experiment: 1 cycles: 1 precIntensity: 146367.0 FinneganScanNumber: 3136 MStype: enumIsNormalMS rawFile: 16H146_5_120M.raw
7	gi|872596299	sugar ABC transporter substrate-binding protein [Marinovum algicola]	514	47672	29	18	7	5	4647	1	1	1	675.779	1349.54	2	1349.54	-0.0009	0	58.27	0.0036	R	MQGYTDDFTEK	T	Oxidation (M)	0.20000000000.0			Elution from: 31.128 to 31.128 period: 0 experiment: 1 cycles: 1 precIntensity: 233380.0 FinneganScanNumber: 2298 MStype: enumIsNormalMS rawFile: 16H146_5_120M.raw
7	gi|872596299	sugar ABC transporter substrate-binding protein [Marinovum algicola]	514	47672	29	18	7	5	4648	1	1	1	675.779	1349.54	2	1349.54	-0.0004	0	51.12	0.018	R	MQGYTDDFTEK	T	Oxidation (M)	0.20000000000.0			Elution from: 31.187 to 31.187 period: 0 experiment: 1 cycles: 1 precIntensity: 210205.0 FinneganScanNumber: 2304 MStype: enumIsNormalMS rawFile: 16H146_5_120M.raw
7	gi|872596299	sugar ABC transporter substrate-binding protein [Marinovum algicola]	514	47672	29	18	7	5	6262	1	1	1	827.872	1653.73	2	1653.73	0	0	86.82	2.7e-05	K	AQAIAEEEMEAAGYR	-	Oxidation (M)	0.000000002000000.0			Elution from: 44.048 to 44.048 period: 0 experiment: 1 cycles: 1 precIntensity: 39720.0 FinneganScanNumber: 3644 MStype: enumIsNormalMS rawFile: 16H146_5_120M.raw
7	gi|872596299	sugar ABC transporter substrate-binding protein [Marinovum algicola]	514	47672	29	18	7	5	6263	1	1	1	827.873	1653.73	2	1653.73	0.0018	0	66.01	0.0029	K	AQAIAEEEMEAAGYR	-	Oxidation (M)	0.000000002000000.0			Elution from: 44.088 to 44.088 period: 0 experiment: 1 cycles: 1 precIntensity: 44385.0 FinneganScanNumber: 3648 MStype: enumIsNormalMS rawFile: 16H146_5_120M.raw
7	gi|872596299	sugar ABC transporter substrate-binding protein [Marinovum algicola]	514	47672	29	18	7	5	6530	2	1	1	873.928	1745.84	2	1745.84	-0.0036	0	22.18	180	K	AGLEMPEAPTWEFIR	E					Elution from: 116.470 to 116.470 period: 0 experiment: 1 cycles: 1 precIntensity: 585275.0 FinneganScanNumber: 10706 MStype: enumIsNormalMS rawFile: 16H146_5_120M.raw
7	gi|872596299	sugar ABC transporter substrate-binding protein [Marinovum algicola]	514	47672	29	18	7	5	6570	1	1	1	881.929	1761.84	2	1761.84	0.004	0	44.41	1.1	K	AGLEMPEAPTWEFIR	E	Oxidation (M)	0.000020000000000.0			Elution from: 91.338 to 91.338 period: 0 experiment: 1 cycles: 1 precIntensity: 18584.0 FinneganScanNumber: 8366 MStype: enumIsNormalMS rawFile: 16H146_5_120M.raw
7	gi|872596299	sugar ABC transporter substrate-binding protein [Marinovum algicola]	514	47672	29	18	7	5	7057	1	1	1	951.461	1900.91	2	1900.91	-0.0025	0	63.62	0.012	R	TSLYETPEYQEVPFAK	M					Elution from: 103.988 to 103.988 period: 0 experiment: 1 cycles: 1 precIntensity: 315717.0 FinneganScanNumber: 9462 MStype: enumIsNormalMS rawFile: 16H146_5_120M.raw
7	gi|872596299	sugar ABC transporter substrate-binding protein [Marinovum algicola]	514	47672	29	18	7	5	7058	1	1	1	951.462	1900.91	2	1900.91	0.0005	0	53.38	0.13	R	TSLYETPEYQEVPFAK	M					Elution from: 75.715 to 75.715 period: 0 experiment: 1 cycles: 1 precIntensity: 92983.0 FinneganScanNumber: 6953 MStype: enumIsNormalMS rawFile: 16H146_5_120M.raw
7	gi|872596299	sugar ABC transporter substrate-binding protein [Marinovum algicola]	514	47672	29	18	7	5	7059	1	1	1	951.462	1900.91	2	1900.91	0.0009	0	65.12	0.0087	R	TSLYETPEYQEVPFAK	M					Elution from: 106.063 to 106.063 period: 0 experiment: 1 cycles: 1 precIntensity: 105715.0 FinneganScanNumber: 9647 MStype: enumIsNormalMS rawFile: 16H146_5_120M.raw
7	gi|872596299	sugar ABC transporter substrate-binding protein [Marinovum algicola]	514	47672	29	18	7	5	7060	1	1	1	951.463	1900.91	2	1900.91	0.0012	0	72.27	0.0018	R	TSLYETPEYQEVPFAK	M					Elution from: 104.047 to 104.047 period: 0 experiment: 1 cycles: 1 precIntensity: 314261.0 FinneganScanNumber: 9468 MStype: enumIsNormalMS rawFile: 16H146_5_120M.raw
7	gi|872596299	sugar ABC transporter substrate-binding protein [Marinovum algicola]	514	47672	29	18	7	5	7061	1	1	1	951.463	1900.91	2	1900.91	0.0015	0	25.2	88	R	TSLYETPEYQEVPFAK	M					Elution from: 101.937 to 101.937 period: 0 experiment: 1 cycles: 1 precIntensity: 14993.0 FinneganScanNumber: 9285 MStype: enumIsNormalMS rawFile: 16H146_5_120M.raw
7	gi|872596299	sugar ABC transporter substrate-binding protein [Marinovum algicola]	514	47672	29	18	7	5	7062	1	1	1	951.463	1900.91	2	1900.91	0.0018	0	20.02	300	R	TSLYETPEYQEVPFAK	M					Elution from: 108.253 to 108.253 period: 0 experiment: 1 cycles: 1 precIntensity: 43358.0 FinneganScanNumber: 9848 MStype: enumIsNormalMS rawFile: 16H146_5_120M.raw
7	gi|872596299	sugar ABC transporter substrate-binding protein [Marinovum algicola]	514	47672	29	18	7	5	7291	1	1	1	1010.94	2019.86	2	2019.86	0.0001	0	42.08	0.4	R	EAAAAMDDDANDVNGICLR	G					Elution from: 57.910 to 57.910 period: 0 experiment: 1 cycles: 1 precIntensity: 50954.0 FinneganScanNumber: 5118 MStype: enumIsNormalMS rawFile: 16H146_5_120M.raw
7	gi|872596299	sugar ABC transporter substrate-binding protein [Marinovum algicola]	514	47672	29	18	7	5	7294	1	1	1	1011.43	2020.84	2	2020.85	-0.0019	0	111.29	3.6e-08	R	EAAAAMDDDANDVNGICLR	G	Deamidated (NQ)	0.0000000000000100000.0			Elution from: 55.842 to 55.842 period: 0 experiment: 1 cycles: 1 precIntensity: 42301.0 FinneganScanNumber: 4904 MStype: enumIsNormalMS rawFile: 16H146_5_120M.raw
7	gi|872596299	sugar ABC transporter substrate-binding protein [Marinovum algicola]	514	47672	29	18	7	5	7295	1	1	1	1011.43	2020.85	2	2020.85	0.0019	0	124.58	1.8e-09	R	EAAAAMDDDANDVNGICLR	G	Deamidated (NQ)	0.0000000000000100000.0			Elution from: 55.867 to 55.867 period: 0 experiment: 1 cycles: 1 precIntensity: 79964.0 FinneganScanNumber: 4907 MStype: enumIsNormalMS rawFile: 16H146_5_120M.raw
7	gi|872596299	sugar ABC transporter substrate-binding protein [Marinovum algicola]	514	47672	29	18	7	5	7296	1	1	1	1011.43	2020.85	2	2020.85	0.0019	0	68.26	0.00079	R	EAAAAMDDDANDVNGICLR	G	Deamidated (NQ)	0.0000000000000100000.0			Elution from: 63.300 to 63.300 period: 0 experiment: 1 cycles: 1 precIntensity: 24012.0 FinneganScanNumber: 5700 MStype: enumIsNormalMS rawFile: 16H146_5_120M.raw
7	gi|872596299	sugar ABC transporter substrate-binding protein [Marinovum algicola]	514	47672	29	18	7	5	7297	1	1	1	1011.43	2020.85	2	2020.85	0.0079	0	104.87	1.9e-07	R	EAAAAMDDDANDVNGICLR	G	Deamidated (NQ)	0.0000000000000100000.0			Elution from: 63.008 to 63.008 period: 0 experiment: 1 cycles: 1 precIntensity: 16203.0 FinneganScanNumber: 5670 MStype: enumIsNormalMS rawFile: 16H146_5_120M.raw
7	gi|872596299	sugar ABC transporter substrate-binding protein [Marinovum algicola]	514	47672	29	18	7	5	7326	1	1	1	1018.94	2035.86	2	2035.86	-0.0008	0	65.13	0.0017	R	EAAAAMDDDANDVNGICLR	G	Oxidation (M)	0.0000020000000000000.0			Elution from: 47.410 to 47.410 period: 0 experiment: 1 cycles: 1 precIntensity: 22892.0 FinneganScanNumber: 3998 MStype: enumIsNormalMS rawFile: 16H146_5_120M.raw
7	gi|872596299	sugar ABC transporter substrate-binding protein [Marinovum algicola]	514	47672	29	18	7	5	7327	1	1	1	1019.43	2036.84	2	2036.84	-0.0013	0	82.11	2.4e-05	R	EAAAAMDDDANDVNGICLR	G	Deamidated (NQ); Oxidation (M)	0.0000020000000100000.0			Elution from: 45.302 to 45.302 period: 0 experiment: 1 cycles: 1 precIntensity: 82880.0 FinneganScanNumber: 3773 MStype: enumIsNormalMS rawFile: 16H146_5_120M.raw
7	gi|872596299	sugar ABC transporter substrate-binding protein [Marinovum algicola]	514	47672	29	18	7	5	7328	1	1	1	1019.43	2036.84	2	2036.84	0.001	0	104.03	1.4e-07	R	EAAAAMDDDANDVNGICLR	G	Deamidated (NQ); Oxidation (M)	0.0000020000000100000.0			Elution from: 52.325 to 52.325 period: 0 experiment: 1 cycles: 1 precIntensity: 30149.0 FinneganScanNumber: 4520 MStype: enumIsNormalMS rawFile: 16H146_5_120M.raw
7	gi|872596299	sugar ABC transporter substrate-binding protein [Marinovum algicola]	514	47672	29	18	7	5	7329	1	1	1	1019.43	2036.84	2	2036.84	0.0022	0	74.4	0.00015	R	EAAAAMDDDANDVNGICLR	G	Deamidated (NQ); Oxidation (M)	0.0000020000000100000.0			Elution from: 45.245 to 45.245 period: 0 experiment: 1 cycles: 1 precIntensity: 37012.0 FinneganScanNumber: 3767 MStype: enumIsNormalMS rawFile: 16H146_5_120M.raw
8	gi|872562253	ATP synthase subunit alpha [Marinovum algicola]	501	55230	32	14	8	4	1062	1	1	0	362.229	722.444	2	722.444	-0.0002	0	35.93	0.42	K	APGIIPR	K					Elution from: 25.425 to 25.425 period: 0 experiment: 1 cycles: 1 precIntensity: 86739.0 FinneganScanNumber: 1732 MStype: enumIsNormalMS rawFile: 16H146_5_120M.raw
8	gi|872562253	ATP synthase subunit alpha [Marinovum algicola]	501	55230	32	14	8	4	1063	5	1	0	362.229	722.444	2	722.444	-0.0001	0	20.91	13	K	APGIIPR	K					Elution from: 35.483 to 35.483 period: 0 experiment: 1 cycles: 1 precIntensity: 12527.0 FinneganScanNumber: 2744 MStype: enumIsNormalMS rawFile: 16H146_5_120M.raw
8	gi|872562253	ATP synthase subunit alpha [Marinovum algicola]	501	55230	32	14	8	4	1064	1	1	0	362.229	722.444	2	722.444	0.0002	0	37.72	0.28	K	APGIIPR	K					Elution from: 25.363 to 25.363 period: 0 experiment: 1 cycles: 1 precIntensity: 87949.0 FinneganScanNumber: 1726 MStype: enumIsNormalMS rawFile: 16H146_5_120M.raw
8	gi|872562253	ATP synthase subunit alpha [Marinovum algicola]	501	55230	32	14	8	4	1065	1	1	0	362.229	722.444	2	722.444	0.0002	0	26.54	3.6	K	APGIIPR	K					Elution from: 27.642 to 27.642 period: 0 experiment: 1 cycles: 1 precIntensity: 72855.0 FinneganScanNumber: 1951 MStype: enumIsNormalMS rawFile: 16H146_5_120M.raw
8	gi|872562253	ATP synthase subunit alpha [Marinovum algicola]	501	55230	32	14	8	4	1066	1	1	0	362.229	722.444	2	722.444	0.0003	0	28.21	2.5	K	APGIIPR	K					Elution from: 27.513 to 27.513 period: 0 experiment: 1 cycles: 1 precIntensity: 99555.0 FinneganScanNumber: 1939 MStype: enumIsNormalMS rawFile: 16H146_5_120M.raw
8	gi|872562253	ATP synthase subunit alpha [Marinovum algicola]	501	55230	32	14	8	4	2622	1	1	0	529.786	1057.56	2	1057.56	-0.0023	0	39.07	4.3	K	AVDSMIPIGR	G					Elution from: 58.752 to 58.752 period: 0 experiment: 1 cycles: 1 precIntensity: 42400.0 FinneganScanNumber: 5210 MStype: enumIsNormalMS rawFile: 16H146_5_120M.raw
8	gi|872562253	ATP synthase subunit alpha [Marinovum algicola]	501	55230	32	14	8	4	2624	1	1	0	529.787	1057.56	2	1057.56	0.0001	0	43.93	1	K	AVDSMIPIGR	G					Elution from: 53.653 to 53.653 period: 0 experiment: 1 cycles: 1 precIntensity: 122958.0 FinneganScanNumber: 4661 MStype: enumIsNormalMS rawFile: 16H146_5_120M.raw
8	gi|872562253	ATP synthase subunit alpha [Marinovum algicola]	501	55230	32	14	8	4	2625	1	1	0	529.787	1057.56	2	1057.56	0.0005	0	51.7	0.17	K	AVDSMIPIGR	G					Elution from: 53.700 to 53.700 period: 0 experiment: 1 cycles: 1 precIntensity: 140844.0 FinneganScanNumber: 4667 MStype: enumIsNormalMS rawFile: 16H146_5_120M.raw
8	gi|872562253	ATP synthase subunit alpha [Marinovum algicola]	501	55230	32	14	8	4	3300	1	1	0	592.319	1182.62	2	1182.62	-0.0009	0	65.06	0.0066	R	VVDGLGNPLDGK	G					Elution from: 49.578 to 49.578 period: 0 experiment: 1 cycles: 1 precIntensity: 244323.0 FinneganScanNumber: 4226 MStype: enumIsNormalMS rawFile: 16H146_5_120M.raw
8	gi|872562253	ATP synthase subunit alpha [Marinovum algicola]	501	55230	32	14	8	4	3301	1	1	0	592.319	1182.62	2	1182.62	-0.0007	0	64.92	0.0069	R	VVDGLGNPLDGK	G					Elution from: 49.545 to 49.545 period: 0 experiment: 1 cycles: 1 precIntensity: 59140.0 FinneganScanNumber: 4222 MStype: enumIsNormalMS rawFile: 16H146_5_120M.raw
8	gi|872562253	ATP synthase subunit alpha [Marinovum algicola]	501	55230	32	14	8	4	3521	1	1	0	607.36	1212.7	2	1212.71	-0.0029	0	67.86	0.0025	M	GIQAAEISAILK	E					Elution from: 82.598 to 82.598 period: 0 experiment: 1 cycles: 1 precIntensity: 33336.0 FinneganScanNumber: 7589 MStype: enumIsNormalMS rawFile: 16H146_5_120M.raw
8	gi|872562253	ATP synthase subunit alpha [Marinovum algicola]	501	55230	32	14	8	4	3522	1	1	0	607.361	1212.71	2	1212.71	-0.0007	0	57.55	0.029	M	GIQAAEISAILK	E					Elution from: 82.513 to 82.513 period: 0 experiment: 1 cycles: 1 precIntensity: 36380.0 FinneganScanNumber: 7581 MStype: enumIsNormalMS rawFile: 16H146_5_120M.raw
8	gi|872562253	ATP synthase subunit alpha [Marinovum algicola]	501	55230	32	14	8	4	3681	1	1	0	621.855	1241.7	2	1241.7	-0.0019	0	48.43	0.34	K	TAVALDAVLNQK	S					Elution from: 98.468 to 98.468 period: 0 experiment: 1 cycles: 1 precIntensity: 16207.0 FinneganScanNumber: 8986 MStype: enumIsNormalMS rawFile: 16H146_5_120M.raw
8	gi|872562253	ATP synthase subunit alpha [Marinovum algicola]	501	55230	32	14	8	4	3686	3	1	0	621.856	1241.7	2	1241.7	-0.0015	0	24.41	90	K	TAVALDAVLNQK	S					Elution from: 93.857 to 93.857 period: 0 experiment: 1 cycles: 1 precIntensity: 11227.0 FinneganScanNumber: 8587 MStype: enumIsNormalMS rawFile: 16H146_5_120M.raw
8	gi|872562253	ATP synthase subunit alpha [Marinovum algicola]	501	55230	32	14	8	4	3687	10	1	0	621.856	1241.7	2	1241.7	-0.0014	0	28.83	33	K	TAVALDAVLNQK	S					Elution from: 98.387 to 98.387 period: 0 experiment: 1 cycles: 1 precIntensity: 11055.0 FinneganScanNumber: 8979 MStype: enumIsNormalMS rawFile: 16H146_5_120M.raw
8	gi|872562253	ATP synthase subunit alpha [Marinovum algicola]	501	55230	32	14	8	4	3689	3	1	0	621.856	1241.7	2	1241.7	-0.0012	0	21.26	190	K	TAVALDAVLNQK	S					Elution from: 96.288 to 96.288 period: 0 experiment: 1 cycles: 1 precIntensity: 19078.0 FinneganScanNumber: 8797 MStype: enumIsNormalMS rawFile: 16H146_5_120M.raw
8	gi|872562253	ATP synthase subunit alpha [Marinovum algicola]	501	55230	32	14	8	4	3691	8	1	0	621.856	1241.7	2	1241.7	-0.0007	0	29.6	28	K	TAVALDAVLNQK	S					Elution from: 102.675 to 102.675 period: 0 experiment: 1 cycles: 1 precIntensity: 18813.0 FinneganScanNumber: 9349 MStype: enumIsNormalMS rawFile: 16H146_5_120M.raw
8	gi|872562253	ATP synthase subunit alpha [Marinovum algicola]	501	55230	32	14	8	4	3694	2	1	0	621.856	1241.7	2	1241.7	0.0004	0	20.33	210	K	TAVALDAVLNQK	S					Elution from: 96.347 to 96.347 period: 0 experiment: 1 cycles: 1 precIntensity: 10187.0 FinneganScanNumber: 8802 MStype: enumIsNormalMS rawFile: 16H146_5_120M.raw
8	gi|872562253	ATP synthase subunit alpha [Marinovum algicola]	501	55230	32	14	8	4	5915	1	1	0	526.965	1577.87	3	1577.88	-0.0033	1	31.55	9.8	R	VVDGLGNPLDGKGPIK	A					Elution from: 60.773 to 60.773 period: 0 experiment: 1 cycles: 1 precIntensity: 61046.0 FinneganScanNumber: 5426 MStype: enumIsNormalMS rawFile: 16H146_5_120M.raw
8	gi|872562253	ATP synthase subunit alpha [Marinovum algicola]	501	55230	32	14	8	4	6204	1	1	0	819.446	1636.88	2	1636.88	-0.0017	0	42.83	1.2	R	TNSIVDVPAGPELLGR	V					Elution from: 79.805 to 79.805 period: 0 experiment: 1 cycles: 1 precIntensity: 31560.0 FinneganScanNumber: 7334 MStype: enumIsNormalMS rawFile: 16H146_5_120M.raw
8	gi|872562253	ATP synthase subunit alpha [Marinovum algicola]	501	55230	32	14	8	4	6205	1	1	0	819.447	1636.88	2	1636.88	0.0001	0	88.07	3.4e-05	R	TNSIVDVPAGPELLGR	V					Elution from: 113.553 to 113.553 period: 0 experiment: 1 cycles: 1 precIntensity: 909092.0 FinneganScanNumber: 10397 MStype: enumIsNormalMS rawFile: 16H146_5_120M.raw
8	gi|872562253	ATP synthase subunit alpha [Marinovum algicola]	501	55230	32	14	8	4	6206	1	1	0	819.447	1636.88	2	1636.88	0.0008	0	58.91	0.029	R	TNSIVDVPAGPELLGR	V					Elution from: 79.873 to 79.873 period: 0 experiment: 1 cycles: 1 precIntensity: 63987.0 FinneganScanNumber: 7340 MStype: enumIsNormalMS rawFile: 16H146_5_120M.raw
8	gi|872562253	ATP synthase subunit alpha [Marinovum algicola]	501	55230	32	14	8	4	6207	1	1	0	819.447	1636.88	2	1636.88	0.0019	0	83.86	7.7e-05	R	TNSIVDVPAGPELLGR	V					Elution from: 113.610 to 113.610 period: 0 experiment: 1 cycles: 1 precIntensity: 1230041.0 FinneganScanNumber: 10403 MStype: enumIsNormalMS rawFile: 16H146_5_120M.raw
8	gi|872562253	ATP synthase subunit alpha [Marinovum algicola]	501	55230	32	14	8	4	6210	1	1	0	819.939	1637.86	2	1637.86	0.001	0	48.02	0.4	R	TNSIVDVPAGPELLGR	V	Deamidated (NQ)	0.0100000000000000.0			Elution from: 111.567 to 111.567 period: 0 experiment: 1 cycles: 1 precIntensity: 53213.0 FinneganScanNumber: 10184 MStype: enumIsNormalMS rawFile: 16H146_5_120M.raw
8	gi|872562253	ATP synthase subunit alpha [Marinovum algicola]	501	55230	32	14	8	4	6211	1	1	0	819.939	1637.86	2	1637.86	0.0015	0	46.11	0.63	R	TNSIVDVPAGPELLGR	V	Deamidated (NQ)	0.0100000000000000.0			Elution from: 111.498 to 111.498 period: 0 experiment: 1 cycles: 1 precIntensity: 103589.0 FinneganScanNumber: 10176 MStype: enumIsNormalMS rawFile: 16H146_5_120M.raw
8	gi|872562253	ATP synthase subunit alpha [Marinovum algicola]	501	55230	32	14	8	4	7066	1	1	1	952.46	1902.9	2	1902.91	-0.0023	0	110.83	2.3e-07	K	EQIQNFGQEAEVAEVGR	V					Elution from: 61.318 to 61.318 period: 0 experiment: 1 cycles: 1 precIntensity: 169978.0 FinneganScanNumber: 5487 MStype: enumIsNormalMS rawFile: 16H146_5_120M.raw
8	gi|872562253	ATP synthase subunit alpha [Marinovum algicola]	501	55230	32	14	8	4	7067	1	1	1	952.46	1902.91	2	1902.91	-0.0013	0	92.24	1.8e-05	K	EQIQNFGQEAEVAEVGR	V					Elution from: 61.267 to 61.267 period: 0 experiment: 1 cycles: 1 precIntensity: 66873.0 FinneganScanNumber: 5481 MStype: enumIsNormalMS rawFile: 16H146_5_120M.raw
8	gi|872562253	ATP synthase subunit alpha [Marinovum algicola]	501	55230	32	14	8	4	7068	1	1	1	952.461	1902.91	2	1902.91	0.0008	0	74.5	0.0011	K	EQIQNFGQEAEVAEVGR	V					Elution from: 67.967 to 67.967 period: 0 experiment: 1 cycles: 1 precIntensity: 28515.0 FinneganScanNumber: 6185 MStype: enumIsNormalMS rawFile: 16H146_5_120M.raw
8	gi|872562253	ATP synthase subunit alpha [Marinovum algicola]	501	55230	32	14	8	4	7069	1	1	1	952.462	1902.91	2	1902.91	0.0018	0	78.58	0.00043	K	EQIQNFGQEAEVAEVGR	V					Elution from: 63.403 to 63.403 period: 0 experiment: 1 cycles: 1 precIntensity: 44261.0 FinneganScanNumber: 5712 MStype: enumIsNormalMS rawFile: 16H146_5_120M.raw
8	gi|872562253	ATP synthase subunit alpha [Marinovum algicola]	501	55230	32	14	8	4	7070	1	1	1	952.462	1902.91	2	1902.91	0.0021	0	67.66	0.0056	K	EQIQNFGQEAEVAEVGR	V					Elution from: 63.505 to 63.505 period: 0 experiment: 1 cycles: 1 precIntensity: 34223.0 FinneganScanNumber: 5723 MStype: enumIsNormalMS rawFile: 16H146_5_120M.raw
8	gi|872562253	ATP synthase subunit alpha [Marinovum algicola]	501	55230	32	14	8	4	7071	1	1	1	952.462	1902.91	2	1902.91	0.0021	0	89.51	3.6e-05	K	EQIQNFGQEAEVAEVGR	V					Elution from: 65.910 to 65.910 period: 0 experiment: 1 cycles: 1 precIntensity: 28699.0 FinneganScanNumber: 5971 MStype: enumIsNormalMS rawFile: 16H146_5_120M.raw
8	gi|872562253	ATP synthase subunit alpha [Marinovum algicola]	501	55230	32	14	8	4	7072	1	1	1	952.463	1902.91	2	1902.91	0.0047	0	66.44	0.007	K	EQIQNFGQEAEVAEVGR	V					Elution from: 67.218 to 67.218 period: 0 experiment: 1 cycles: 1 precIntensity: 16257.0 FinneganScanNumber: 6108 MStype: enumIsNormalMS rawFile: 16H146_5_120M.raw
9	gi|872587698	C4-dicarboxylate ABC transporter substrate-binding protein [Marinovum algicola]	457	33945	46	19	6	4	3050	1	1	1	568.784	1135.55	2	1135.55	-0.0014	0	30.93	23	R	AGTGISSVADMK	G					Elution from: 37.583 to 37.583 period: 0 experiment: 1 cycles: 1 precIntensity: 118532.0 FinneganScanNumber: 2956 MStype: enumIsNormalMS rawFile: 16H146_5_120M.raw
9	gi|872587698	C4-dicarboxylate ABC transporter substrate-binding protein [Marinovum algicola]	457	33945	46	19	6	4	3051	1	1	1	568.784	1135.55	2	1135.55	-0.0011	0	37.29	5.4	R	AGTGISSVADMK	G					Elution from: 37.537 to 37.537 period: 0 experiment: 1 cycles: 1 precIntensity: 132872.0 FinneganScanNumber: 2951 MStype: enumIsNormalMS rawFile: 16H146_5_120M.raw
9	gi|872587698	C4-dicarboxylate ABC transporter substrate-binding protein [Marinovum algicola]	457	33945	46	19	6	4	3076	1	1	1	571.798	1141.58	2	1141.58	-0.002	0	43.57	0.77	K	AVNIGNPGSGTR	A					Elution from: 18.532 to 18.532 period: 0 experiment: 1 cycles: 1 precIntensity: 40547.0 FinneganScanNumber: 1070 MStype: enumIsNormalMS rawFile: 16H146_5_120M.raw
9	gi|872587698	C4-dicarboxylate ABC transporter substrate-binding protein [Marinovum algicola]	457	33945	46	19	6	4	3077	1	1	1	571.798	1141.58	2	1141.58	-0.0019	0	45.54	0.49	K	AVNIGNPGSGTR	A					Elution from: 18.588 to 18.588 period: 0 experiment: 1 cycles: 1 precIntensity: 61980.0 FinneganScanNumber: 1075 MStype: enumIsNormalMS rawFile: 16H146_5_120M.raw
9	gi|872587698	C4-dicarboxylate ABC transporter substrate-binding protein [Marinovum algicola]	457	33945	46	19	6	4	3078	1	1	1	571.799	1141.58	2	1141.58	-0.0008	0	49.83	0.17	K	AVNIGNPGSGTR	A					Elution from: 20.642 to 20.642 period: 0 experiment: 1 cycles: 1 precIntensity: 68555.0 FinneganScanNumber: 1270 MStype: enumIsNormalMS rawFile: 16H146_5_120M.raw
9	gi|872587698	C4-dicarboxylate ABC transporter substrate-binding protein [Marinovum algicola]	457	33945	46	19	6	4	3081	1	1	1	571.799	1141.58	2	1141.58	-0.0001	0	50.28	0.15	K	AVNIGNPGSGTR	A					Elution from: 20.573 to 20.573 period: 0 experiment: 1 cycles: 1 precIntensity: 92718.0 FinneganScanNumber: 1263 MStype: enumIsNormalMS rawFile: 16H146_5_120M.raw
9	gi|872587698	C4-dicarboxylate ABC transporter substrate-binding protein [Marinovum algicola]	457	33945	46	19	6	4	3082	1	1	1	571.8	1141.58	2	1141.58	0.0007	0	20.7	140	K	AVNIGNPGSGTR	A					Elution from: 22.882 to 22.882 period: 0 experiment: 1 cycles: 1 precIntensity: 15749.0 FinneganScanNumber: 1486 MStype: enumIsNormalMS rawFile: 16H146_5_120M.raw
9	gi|872587698	C4-dicarboxylate ABC transporter substrate-binding protein [Marinovum algicola]	457	33945	46	19	6	4	3120	1	1	1	576.782	1151.55	2	1151.55	-0.0005	0	45.33	0.62	R	AGTGISSVADMK	G	Oxidation (M)	0.000000000020.0			Elution from: 20.122 to 20.122 period: 0 experiment: 1 cycles: 1 precIntensity: 68653.0 FinneganScanNumber: 1221 MStype: enumIsNormalMS rawFile: 16H146_5_120M.raw
9	gi|872587698	C4-dicarboxylate ABC transporter substrate-binding protein [Marinovum algicola]	457	33945	46	19	6	4	3121	1	1	1	576.782	1151.55	2	1151.55	-0.0002	0	37.36	3.9	R	AGTGISSVADMK	G	Oxidation (M)	0.000000000020.0			Elution from: 20.090 to 20.090 period: 0 experiment: 1 cycles: 1 precIntensity: 55457.0 FinneganScanNumber: 1218 MStype: enumIsNormalMS rawFile: 16H146_5_120M.raw
9	gi|872587698	C4-dicarboxylate ABC transporter substrate-binding protein [Marinovum algicola]	457	33945	46	19	6	4	4671	1	1	1	677.798	1353.58	2	1353.58	-0.0023	0	46.12	0.21	R	AFDGDEPYGDLR	S					Elution from: 56.378 to 56.378 period: 0 experiment: 1 cycles: 1 precIntensity: 56754.0 FinneganScanNumber: 4963 MStype: enumIsNormalMS rawFile: 16H146_5_120M.raw
9	gi|872587698	C4-dicarboxylate ABC transporter substrate-binding protein [Marinovum algicola]	457	33945	46	19	6	4	4672	1	1	1	677.798	1353.58	2	1353.58	-0.0015	0	60.05	0.0089	R	AFDGDEPYGDLR	S					Elution from: 50.100 to 50.100 period: 0 experiment: 1 cycles: 1 precIntensity: 172201.0 FinneganScanNumber: 4281 MStype: enumIsNormalMS rawFile: 16H146_5_120M.raw
9	gi|872587698	C4-dicarboxylate ABC transporter substrate-binding protein [Marinovum algicola]	457	33945	46	19	6	4	4673	1	1	1	677.798	1353.58	2	1353.58	-0.0014	0	32.95	4.6	R	AFDGDEPYGDLR	S					Elution from: 58.438 to 58.438 period: 0 experiment: 1 cycles: 1 precIntensity: 49843.0 FinneganScanNumber: 5176 MStype: enumIsNormalMS rawFile: 16H146_5_120M.raw
9	gi|872587698	C4-dicarboxylate ABC transporter substrate-binding protein [Marinovum algicola]	457	33945	46	19	6	4	4674	1	1	1	677.798	1353.58	2	1353.58	-0.0014	0	72.31	0.00053	R	AFDGDEPYGDLR	S					Elution from: 50.135 to 50.135 period: 0 experiment: 1 cycles: 1 precIntensity: 191386.0 FinneganScanNumber: 4286 MStype: enumIsNormalMS rawFile: 16H146_5_120M.raw
9	gi|872587698	C4-dicarboxylate ABC transporter substrate-binding protein [Marinovum algicola]	457	33945	46	19	6	4	4675	1	1	1	677.798	1353.58	2	1353.58	-0.0013	0	25.67	24	R	AFDGDEPYGDLR	S					Elution from: 61.090 to 61.090 period: 0 experiment: 1 cycles: 1 precIntensity: 40394.0 FinneganScanNumber: 5460 MStype: enumIsNormalMS rawFile: 16H146_5_120M.raw
9	gi|872587698	C4-dicarboxylate ABC transporter substrate-binding protein [Marinovum algicola]	457	33945	46	19	6	4	4676	1	1	1	677.799	1353.58	2	1353.58	-0.0009	0	37.23	1.6	R	AFDGDEPYGDLR	S					Elution from: 48.075 to 48.075 period: 0 experiment: 1 cycles: 1 precIntensity: 36957.0 FinneganScanNumber: 4069 MStype: enumIsNormalMS rawFile: 16H146_5_120M.raw
9	gi|872587698	C4-dicarboxylate ABC transporter substrate-binding protein [Marinovum algicola]	457	33945	46	19	6	4	4677	1	1	1	677.799	1353.58	2	1353.58	-0.0008	0	57.47	0.015	R	AFDGDEPYGDLR	S					Elution from: 54.342 to 54.342 period: 0 experiment: 1 cycles: 1 precIntensity: 56453.0 FinneganScanNumber: 4740 MStype: enumIsNormalMS rawFile: 16H146_5_120M.raw
9	gi|872587698	C4-dicarboxylate ABC transporter substrate-binding protein [Marinovum algicola]	457	33945	46	19	6	4	4678	1	1	1	677.799	1353.58	2	1353.58	-0.0008	0	47.28	0.16	R	AFDGDEPYGDLR	S					Elution from: 56.410 to 56.410 period: 0 experiment: 1 cycles: 1 precIntensity: 55448.0 FinneganScanNumber: 4966 MStype: enumIsNormalMS rawFile: 16H146_5_120M.raw
9	gi|872587698	C4-dicarboxylate ABC transporter substrate-binding protein [Marinovum algicola]	457	33945	46	19	6	4	4679	1	1	1	677.799	1353.58	2	1353.58	-0.0007	0	56.79	0.018	R	AFDGDEPYGDLR	S					Elution from: 54.283 to 54.283 period: 0 experiment: 1 cycles: 1 precIntensity: 66924.0 FinneganScanNumber: 4733 MStype: enumIsNormalMS rawFile: 16H146_5_120M.raw
9	gi|872587698	C4-dicarboxylate ABC transporter substrate-binding protein [Marinovum algicola]	457	33945	46	19	6	4	4680	1	1	1	677.799	1353.58	2	1353.58	-0.0003	0	51.56	0.058	R	AFDGDEPYGDLR	S					Elution from: 52.218 to 52.218 period: 0 experiment: 1 cycles: 1 precIntensity: 76402.0 FinneganScanNumber: 4508 MStype: enumIsNormalMS rawFile: 16H146_5_120M.raw
9	gi|872587698	C4-dicarboxylate ABC transporter substrate-binding protein [Marinovum algicola]	457	33945	46	19	6	4	4681	1	1	1	677.799	1353.58	2	1353.58	-0.0002	0	33.44	3.7	R	AFDGDEPYGDLR	S					Elution from: 63.447 to 63.447 period: 0 experiment: 1 cycles: 1 precIntensity: 41230.0 FinneganScanNumber: 5717 MStype: enumIsNormalMS rawFile: 16H146_5_120M.raw
9	gi|872587698	C4-dicarboxylate ABC transporter substrate-binding protein [Marinovum algicola]	457	33945	46	19	6	4	4682	2	1	1	677.799	1353.58	2	1353.58	0.0004	0	25.32	28	R	AFDGDEPYGDLR	S					Elution from: 61.130 to 61.130 period: 0 experiment: 1 cycles: 1 precIntensity: 53577.0 FinneganScanNumber: 5465 MStype: enumIsNormalMS rawFile: 16H146_5_120M.raw
9	gi|872587698	C4-dicarboxylate ABC transporter substrate-binding protein [Marinovum algicola]	457	33945	46	19	6	4	5654	1	1	1	758.837	1515.66	2	1515.66	-0.0038	0	68.14	0.0012	R	CSVESTGGSVYNTR	T					Elution from: 24.282 to 24.282 period: 0 experiment: 1 cycles: 1 precIntensity: 16517.0 FinneganScanNumber: 1621 MStype: enumIsNormalMS rawFile: 16H146_5_120M.raw
9	gi|872587698	C4-dicarboxylate ABC transporter substrate-binding protein [Marinovum algicola]	457	33945	46	19	6	4	5655	1	1	1	758.837	1515.66	2	1515.66	-0.0029	0	50.04	0.082	R	CSVESTGGSVYNTR	T					Elution from: 26.378 to 26.378 period: 0 experiment: 1 cycles: 1 precIntensity: 14145.0 FinneganScanNumber: 1828 MStype: enumIsNormalMS rawFile: 16H146_5_120M.raw
9	gi|872587698	C4-dicarboxylate ABC transporter substrate-binding protein [Marinovum algicola]	457	33945	46	19	6	4	5656	1	1	1	758.838	1515.66	2	1515.66	-0.0008	0	80.79	7.1e-05	R	CSVESTGGSVYNTR	T					Elution from: 24.327 to 24.327 period: 0 experiment: 1 cycles: 1 precIntensity: 45929.0 FinneganScanNumber: 1625 MStype: enumIsNormalMS rawFile: 16H146_5_120M.raw
9	gi|872587698	C4-dicarboxylate ABC transporter substrate-binding protein [Marinovum algicola]	457	33945	46	19	6	4	5657	1	1	1	758.838	1515.66	2	1515.66	0	0	50.81	0.081	R	CSVESTGGSVYNTR	T					Elution from: 26.585 to 26.585 period: 0 experiment: 1 cycles: 1 precIntensity: 17576.0 FinneganScanNumber: 1847 MStype: enumIsNormalMS rawFile: 16H146_5_120M.raw
9	gi|872587698	C4-dicarboxylate ABC transporter substrate-binding protein [Marinovum algicola]	457	33945	46	19	6	4	5658	1	1	1	758.839	1515.66	2	1515.66	0.0005	0	32.02	5.8	R	CSVESTGGSVYNTR	T					Elution from: 26.652 to 26.652 period: 0 experiment: 1 cycles: 1 precIntensity: 16113.0 FinneganScanNumber: 1853 MStype: enumIsNormalMS rawFile: 16H146_5_120M.raw
9	gi|872587698	C4-dicarboxylate ABC transporter substrate-binding protein [Marinovum algicola]	457	33945	46	19	6	4	7529	1	1	1	1081	2159.99	2	2159.99	-0.0007	0	50.34	0.22	K	ANIPGGMYPGNDSDVVSWGPK	A					Elution from: 110.643 to 110.643 period: 0 experiment: 1 cycles: 1 precIntensity: 56211.0 FinneganScanNumber: 10087 MStype: enumIsNormalMS rawFile: 16H146_5_120M.raw
9	gi|872587698	C4-dicarboxylate ABC transporter substrate-binding protein [Marinovum algicola]	457	33945	46	19	6	4	7530	1	1	1	1081	2159.99	2	2159.99	-0.0005	0	62.98	0.012	K	ANIPGGMYPGNDSDVVSWGPK	A					Elution from: 80.333 to 80.333 period: 0 experiment: 1 cycles: 1 precIntensity: 44644.0 FinneganScanNumber: 7383 MStype: enumIsNormalMS rawFile: 16H146_5_120M.raw
9	gi|872587698	C4-dicarboxylate ABC transporter substrate-binding protein [Marinovum algicola]	457	33945	46	19	6	4	7531	1	1	1	1081	2159.99	2	2159.99	0	0	59.41	0.027	K	ANIPGGMYPGNDSDVVSWGPK	A					Elution from: 110.692 to 110.692 period: 0 experiment: 1 cycles: 1 precIntensity: 79290.0 FinneganScanNumber: 10092 MStype: enumIsNormalMS rawFile: 16H146_5_120M.raw
9	gi|872587698	C4-dicarboxylate ABC transporter substrate-binding protein [Marinovum algicola]	457	33945	46	19	6	4	7532	1	1	1	1081	2159.99	2	2159.99	0	0	69.88	0.0024	K	ANIPGGMYPGNDSDVVSWGPK	A					Elution from: 108.550 to 108.550 period: 0 experiment: 1 cycles: 1 precIntensity: 105003.0 FinneganScanNumber: 9877 MStype: enumIsNormalMS rawFile: 16H146_5_120M.raw
9	gi|872587698	C4-dicarboxylate ABC transporter substrate-binding protein [Marinovum algicola]	457	33945	46	19	6	4	7533	1	1	1	1081.01	2160	2	2159.99	0.0053	0	72.23	0.0015	K	ANIPGGMYPGNDSDVVSWGPK	A					Elution from: 80.282 to 80.282 period: 0 experiment: 1 cycles: 1 precIntensity: 31380.0 FinneganScanNumber: 7378 MStype: enumIsNormalMS rawFile: 16H146_5_120M.raw
9	gi|872587698	C4-dicarboxylate ABC transporter substrate-binding protein [Marinovum algicola]	457	33945	46	19	6	4	7546	1	1	1	1089	2175.99	2	2175.99	0.001	0	39.41	2.4	K	ANIPGGMYPGNDSDVVSWGPK	A	Oxidation (M)	0.000000200000000000000.0			Elution from: 69.963 to 69.963 period: 0 experiment: 1 cycles: 1 precIntensity: 46925.0 FinneganScanNumber: 6386 MStype: enumIsNormalMS rawFile: 16H146_5_120M.raw
9	gi|872587698	C4-dicarboxylate ABC transporter substrate-binding protein [Marinovum algicola]	457	33945	46	19	6	4	7547	1	1	1	1089	2175.99	2	2175.99	0.0011	0	51.78	0.14	K	ANIPGGMYPGNDSDVVSWGPK	A	Oxidation (M)	0.000000200000000000000.0			Elution from: 69.787 to 69.787 period: 0 experiment: 1 cycles: 1 precIntensity: 34828.0 FinneganScanNumber: 6367 MStype: enumIsNormalMS rawFile: 16H146_5_120M.raw
9	gi|872587698	C4-dicarboxylate ABC transporter substrate-binding protein [Marinovum algicola]	457	33945	46	19	6	4	7548	1	1	1	1089	2175.99	2	2175.99	0.0014	0	57.12	0.041	K	ANIPGGMYPGNDSDVVSWGPK	A	Oxidation (M)	0.000000200000000000000.0			Elution from: 69.910 to 69.910 period: 0 experiment: 1 cycles: 1 precIntensity: 45776.0 FinneganScanNumber: 6380 MStype: enumIsNormalMS rawFile: 16H146_5_120M.raw
9	gi|872587698	C4-dicarboxylate ABC transporter substrate-binding protein [Marinovum algicola]	457	33945	46	19	6	4	7549	1	1	1	1089	2175.99	2	2175.99	0.0034	0	54	0.084	K	ANIPGGMYPGNDSDVVSWGPK	A	Oxidation (M)	0.000000200000000000000.0			Elution from: 69.847 to 69.847 period: 0 experiment: 1 cycles: 1 precIntensity: 40429.0 FinneganScanNumber: 6373 MStype: enumIsNormalMS rawFile: 16H146_5_120M.raw
9	gi|872587698	C4-dicarboxylate ABC transporter substrate-binding protein [Marinovum algicola]	457	33945	46	19	6	4	7709	1	1	1	1148.03	2294.04	2	2294.05	-0.0044	0	134.3	7.7e-10	R	NGELDFGVVQSDVQTAAMEGAR	A	Deamidated (NQ)	0.1000000000000000000000.0			Elution from: 109.072 to 109.072 period: 0 experiment: 1 cycles: 1 precIntensity: 109949.0 FinneganScanNumber: 9929 MStype: enumIsNormalMS rawFile: 16H146_5_120M.raw
9	gi|872587698	C4-dicarboxylate ABC transporter substrate-binding protein [Marinovum algicola]	457	33945	46	19	6	4	7710	1	1	1	765.69	2294.05	3	2294.05	-0.0009	0	69.6	0.0024	R	NGELDFGVVQSDVQTAAMEGAR	A	Deamidated (NQ)	0.1000000000000000000000.0			Elution from: 109.113 to 109.113 period: 0 experiment: 1 cycles: 1 precIntensity: 72072.0 FinneganScanNumber: 9933 MStype: enumIsNormalMS rawFile: 16H146_5_120M.raw
9	gi|872587698	C4-dicarboxylate ABC transporter substrate-binding protein [Marinovum algicola]	457	33945	46	19	6	4	7711	2	1	1	765.69	2294.05	3	2294.05	-0.0008	0	55.67	0.059	R	NGELDFGVVQSDVQTAAMEGAR	A	Deamidated (NQ)	0.1000000000000000000000.0			Elution from: 109.142 to 109.142 period: 0 experiment: 1 cycles: 1 precIntensity: 109484.0 FinneganScanNumber: 9936 MStype: enumIsNormalMS rawFile: 16H146_5_120M.raw
9	gi|872587698	C4-dicarboxylate ABC transporter substrate-binding protein [Marinovum algicola]	457	33945	46	19	6	4	7712	1	1	1	1148.03	2294.05	2	2294.05	0.0012	0	136.45	5.2e-10	R	NGELDFGVVQSDVQTAAMEGAR	A	Deamidated (NQ)	0.1000000000000000000000.0			Elution from: 109.052 to 109.052 period: 0 experiment: 1 cycles: 1 precIntensity: 41767.0 FinneganScanNumber: 9927 MStype: enumIsNormalMS rawFile: 16H146_5_120M.raw
9	gi|872587698	C4-dicarboxylate ABC transporter substrate-binding protein [Marinovum algicola]	457	33945	46	19	6	4	7713	1	1	1	1148.03	2294.05	2	2294.05	0.0027	0	103.89	9.3e-07	R	NGELDFGVVQSDVQTAAMEGAR	A	Deamidated (NQ)	0.1000000000000000000000.0			Elution from: 114.282 to 114.282 period: 0 experiment: 1 cycles: 1 precIntensity: 50781.0 FinneganScanNumber: 10473 MStype: enumIsNormalMS rawFile: 16H146_5_120M.raw
9	gi|872587698	C4-dicarboxylate ABC transporter substrate-binding protein [Marinovum algicola]	457	33945	46	19	6	4	7720	1	1	1	770.693	2309.06	3	2309.06	-0.0016	0	45.67	0.64	R	NGELDFGVVQSDVQTAAMEGAR	A	Oxidation (M)	0.0000000000000000020000.0			Elution from: 111.820 to 111.820 period: 0 experiment: 1 cycles: 1 precIntensity: 101846.0 FinneganScanNumber: 10213 MStype: enumIsNormalMS rawFile: 16H146_5_120M.raw
9	gi|872587698	C4-dicarboxylate ABC transporter substrate-binding protein [Marinovum algicola]	457	33945	46	19	6	4	7721	1	1	1	770.693	2309.06	3	2309.06	-0.0013	0	50.61	0.2	R	NGELDFGVVQSDVQTAAMEGAR	A	Oxidation (M)	0.0000000000000000020000.0			Elution from: 111.950 to 111.950 period: 0 experiment: 1 cycles: 1 precIntensity: 126894.0 FinneganScanNumber: 10229 MStype: enumIsNormalMS rawFile: 16H146_5_120M.raw
9	gi|872587698	C4-dicarboxylate ABC transporter substrate-binding protein [Marinovum algicola]	457	33945	46	19	6	4	7722	1	1	1	771.021	2310.04	3	2310.04	-0.0017	0	61.61	0.013	R	NGELDFGVVQSDVQTAAMEGAR	A	Deamidated (NQ); Oxidation (M)	0.1000000000000000020000.0			Elution from: 105.105 to 105.105 period: 0 experiment: 1 cycles: 1 precIntensity: 15288.0 FinneganScanNumber: 9561 MStype: enumIsNormalMS rawFile: 16H146_5_120M.raw
9	gi|872587698	C4-dicarboxylate ABC transporter substrate-binding protein [Marinovum algicola]	457	33945	46	19	6	4	7723	1	1	1	1156.03	2310.05	2	2310.04	0.0021	0	122.55	1.1e-08	R	NGELDFGVVQSDVQTAAMEGAR	A	Deamidated (NQ); Oxidation (M)	0.1000000000000000020000.0			Elution from: 104.995 to 104.995 period: 0 experiment: 1 cycles: 1 precIntensity: 34694.0 FinneganScanNumber: 9552 MStype: enumIsNormalMS rawFile: 16H146_5_120M.raw
9	gi|872587698	C4-dicarboxylate ABC transporter substrate-binding protein [Marinovum algicola]	457	33945	46	19	6	4	7724	1	1	1	1156.03	2310.05	2	2310.04	0.0026	0	89.33	2.3e-05	R	NGELDFGVVQSDVQTAAMEGAR	A	Deamidated (NQ); Oxidation (M)	0.1000000000000000020000.0			Elution from: 110.785 to 110.785 period: 0 experiment: 1 cycles: 1 precIntensity: 48465.0 FinneganScanNumber: 10100 MStype: enumIsNormalMS rawFile: 16H146_5_120M.raw
9	gi|872587698	C4-dicarboxylate ABC transporter substrate-binding protein [Marinovum algicola]	457	33945	46	19	6	4	7725	1	1	1	1156.03	2310.05	2	2310.04	0.0032	0	91.36	1.5e-05	R	NGELDFGVVQSDVQTAAMEGAR	A	Deamidated (NQ); Oxidation (M)	0.1000000000000000020000.0			Elution from: 110.595 to 110.595 period: 0 experiment: 1 cycles: 1 precIntensity: 40908.0 FinneganScanNumber: 10082 MStype: enumIsNormalMS rawFile: 16H146_5_120M.raw
10	gi|872579507	elongation factor Tu [Marinovum algicola]	453	43169	49	7	10	3	1870	7	1	0	460.276	918.537	2	918.539	-0.0012	0	20.26	93	K	TTLTAAITK	Y					Elution from: 32.015 to 32.015 period: 0 experiment: 1 cycles: 1 precIntensity: 172931.0 FinneganScanNumber: 2386 MStype: enumIsNormalMS rawFile: 16H146_5_120M.raw
10	gi|872579507	elongation factor Tu [Marinovum algicola]	453	43169	49	7	10	3	1872	1	1	0	460.277	918.539	2	918.539	0.0001	0	38.22	1.7	K	TTLTAAITK	Y					Elution from: 32.085 to 32.085 period: 0 experiment: 1 cycles: 1 precIntensity: 116225.0 FinneganScanNumber: 2394 MStype: enumIsNormalMS rawFile: 16H146_5_120M.raw
10	gi|872579507	elongation factor Tu [Marinovum algicola]	453	43169	49	7	10	3	3318	1	1	0	593.315	1184.62	2	1184.61	0.0007	0	54.61	0.062	R	GEAGDNIGALLR	G					Elution from: 62.800 to 62.800 period: 0 experiment: 1 cycles: 1 precIntensity: 201326.0 FinneganScanNumber: 5649 MStype: enumIsNormalMS rawFile: 16H146_5_120M.raw
10	gi|872579507	elongation factor Tu [Marinovum algicola]	453	43169	49	7	10	3	3319	1	1	0	593.315	1184.62	2	1184.61	0.0008	0	76.1	0.00044	R	GEAGDNIGALLR	G					Elution from: 111.542 to 111.542 period: 0 experiment: 1 cycles: 1 precIntensity: 95166.0 FinneganScanNumber: 10181 MStype: enumIsNormalMS rawFile: 16H146_5_120M.raw
10	gi|872579507	elongation factor Tu [Marinovum algicola]	453	43169	49	7	10	3	3320	1	1	0	593.316	1184.62	2	1184.61	0.0017	0	78.05	0.00033	R	GEAGDNIGALLR	G					Elution from: 111.590 to 111.590 period: 0 experiment: 1 cycles: 1 precIntensity: 205685.0 FinneganScanNumber: 10187 MStype: enumIsNormalMS rawFile: 16H146_5_120M.raw
10	gi|872579507	elongation factor Tu [Marinovum algicola]	453	43169	49	7	10	3	3321	1	1	0	593.316	1184.62	2	1184.61	0.0018	0	50.96	0.17	R	GEAGDNIGALLR	G					Elution from: 62.863 to 62.863 period: 0 experiment: 1 cycles: 1 precIntensity: 265156.0 FinneganScanNumber: 5655 MStype: enumIsNormalMS rawFile: 16H146_5_120M.raw
10	gi|872579507	elongation factor Tu [Marinovum algicola]	453	43169	49	7	10	3	3414	3	1	1	600.81	1199.61	2	1199.61	-0.0015	0	20.01	180	K	FEAESYILTK	D					Elution from: 103.603 to 103.603 period: 0 experiment: 1 cycles: 1 precIntensity: 24324.0 FinneganScanNumber: 9428 MStype: enumIsNormalMS rawFile: 16H146_5_120M.raw
10	gi|872579507	elongation factor Tu [Marinovum algicola]	453	43169	49	7	10	3	3415	5	1	1	600.81	1199.61	2	1199.61	-0.0013	0	20.72	170	K	FEAESYILTK	D					Elution from: 86.592 to 86.592 period: 0 experiment: 1 cycles: 1 precIntensity: 34376.0 FinneganScanNumber: 7946 MStype: enumIsNormalMS rawFile: 16H146_5_120M.raw
10	gi|872579507	elongation factor Tu [Marinovum algicola]	453	43169	49	7	10	3	3416	1	1	1	600.81	1199.61	2	1199.61	-0.0012	0	41.06	1.6	K	FEAESYILTK	D					Elution from: 90.792 to 90.792 period: 0 experiment: 1 cycles: 1 precIntensity: 26677.0 FinneganScanNumber: 8318 MStype: enumIsNormalMS rawFile: 16H146_5_120M.raw
10	gi|872579507	elongation factor Tu [Marinovum algicola]	453	43169	49	7	10	3	3418	3	1	1	600.81	1199.61	2	1199.61	-0.0011	0	24.44	72	K	FEAESYILTK	D					Elution from: 101.448 to 101.448 period: 0 experiment: 1 cycles: 1 precIntensity: 26860.0 FinneganScanNumber: 9242 MStype: enumIsNormalMS rawFile: 16H146_5_120M.raw
10	gi|872579507	elongation factor Tu [Marinovum algicola]	453	43169	49	7	10	3	3420	2	1	1	600.811	1199.61	2	1199.61	-0.0007	0	20.89	150	K	FEAESYILTK	D					Elution from: 67.027 to 67.027 period: 0 experiment: 1 cycles: 1 precIntensity: 49576.0 FinneganScanNumber: 6089 MStype: enumIsNormalMS rawFile: 16H146_5_120M.raw
10	gi|872579507	elongation factor Tu [Marinovum algicola]	453	43169	49	7	10	3	3422	2	1	1	600.811	1199.61	2	1199.61	-0.0007	0	25.44	51	K	FEAESYILTK	D					Elution from: 99.383 to 99.383 period: 0 experiment: 1 cycles: 1 precIntensity: 26064.0 FinneganScanNumber: 9065 MStype: enumIsNormalMS rawFile: 16H146_5_120M.raw
10	gi|872579507	elongation factor Tu [Marinovum algicola]	453	43169	49	7	10	3	3423	1	1	1	600.811	1199.61	2	1199.61	-0.0006	0	38.91	2.3	K	FEAESYILTK	D					Elution from: 86.662 to 86.662 period: 0 experiment: 1 cycles: 1 precIntensity: 28751.0 FinneganScanNumber: 7952 MStype: enumIsNormalMS rawFile: 16H146_5_120M.raw
10	gi|872579507	elongation factor Tu [Marinovum algicola]	453	43169	49	7	10	3	3424	1	1	1	600.811	1199.61	2	1199.61	-0.0006	0	29.89	18	K	FEAESYILTK	D					Elution from: 90.860 to 90.860 period: 0 experiment: 1 cycles: 1 precIntensity: 26193.0 FinneganScanNumber: 8324 MStype: enumIsNormalMS rawFile: 16H146_5_120M.raw
10	gi|872579507	elongation factor Tu [Marinovum algicola]	453	43169	49	7	10	3	3425	1	1	1	600.811	1199.61	2	1199.61	-0.0006	0	26.87	37	K	FEAESYILTK	D					Elution from: 88.705 to 88.705 period: 0 experiment: 1 cycles: 1 precIntensity: 23343.0 FinneganScanNumber: 8133 MStype: enumIsNormalMS rawFile: 16H146_5_120M.raw
10	gi|872579507	elongation factor Tu [Marinovum algicola]	453	43169	49	7	10	3	3426	1	1	1	600.811	1199.61	2	1199.61	-0.0006	0	25.18	54	K	FEAESYILTK	D					Elution from: 97.247 to 97.247 period: 0 experiment: 1 cycles: 1 precIntensity: 37729.0 FinneganScanNumber: 8880 MStype: enumIsNormalMS rawFile: 16H146_5_120M.raw
10	gi|872579507	elongation factor Tu [Marinovum algicola]	453	43169	49	7	10	3	3427	1	1	1	600.811	1199.61	2	1199.61	-0.0005	0	35.73	4.7	K	FEAESYILTK	D					Elution from: 69.320 to 69.320 period: 0 experiment: 1 cycles: 1 precIntensity: 40351.0 FinneganScanNumber: 6321 MStype: enumIsNormalMS rawFile: 16H146_5_120M.raw
10	gi|872579507	elongation factor Tu [Marinovum algicola]	453	43169	49	7	10	3	3432	1	1	1	600.811	1199.61	2	1199.61	-0.0004	0	22.47	90	K	FEAESYILTK	D					Elution from: 103.525 to 103.525 period: 0 experiment: 1 cycles: 1 precIntensity: 49360.0 FinneganScanNumber: 9421 MStype: enumIsNormalMS rawFile: 16H146_5_120M.raw
10	gi|872579507	elongation factor Tu [Marinovum algicola]	453	43169	49	7	10	3	3436	1	1	1	600.811	1199.61	2	1199.61	-0.0002	0	34.57	5.5	K	FEAESYILTK	D					Elution from: 62.077 to 62.077 period: 0 experiment: 1 cycles: 1 precIntensity: 124184.0 FinneganScanNumber: 5572 MStype: enumIsNormalMS rawFile: 16H146_5_120M.raw
10	gi|872579507	elongation factor Tu [Marinovum algicola]	453	43169	49	7	10	3	3438	3	1	1	600.811	1199.61	2	1199.61	0	0	34.64	5.5	K	FEAESYILTK	D					Elution from: 95.008 to 95.008 period: 0 experiment: 1 cycles: 1 precIntensity: 33630.0 FinneganScanNumber: 8685 MStype: enumIsNormalMS rawFile: 16H146_5_120M.raw
10	gi|872579507	elongation factor Tu [Marinovum algicola]	453	43169	49	7	10	3	3439	3	1	1	600.811	1199.61	2	1199.61	0.0001	0	23.1	78	K	FEAESYILTK	D					Elution from: 99.320 to 99.320 period: 0 experiment: 1 cycles: 1 precIntensity: 30465.0 FinneganScanNumber: 9059 MStype: enumIsNormalMS rawFile: 16H146_5_120M.raw
10	gi|872579507	elongation factor Tu [Marinovum algicola]	453	43169	49	7	10	3	3440	1	1	1	600.811	1199.61	2	1199.61	0.0002	0	30.39	14	K	FEAESYILTK	D					Elution from: 97.298 to 97.298 period: 0 experiment: 1 cycles: 1 precIntensity: 36286.0 FinneganScanNumber: 8885 MStype: enumIsNormalMS rawFile: 16H146_5_120M.raw
10	gi|872579507	elongation factor Tu [Marinovum algicola]	453	43169	49	7	10	3	3442	1	1	1	600.811	1199.61	2	1199.61	0.0003	0	49.43	0.18	K	FEAESYILTK	D					Elution from: 88.770 to 88.770 period: 0 experiment: 1 cycles: 1 precIntensity: 34396.0 FinneganScanNumber: 8139 MStype: enumIsNormalMS rawFile: 16H146_5_120M.raw
10	gi|872579507	elongation factor Tu [Marinovum algicola]	453	43169	49	7	10	3	3443	1	1	1	600.811	1199.61	2	1199.61	0.0005	0	28.06	25	K	FEAESYILTK	D					Elution from: 82.488 to 82.488 period: 0 experiment: 1 cycles: 1 precIntensity: 16951.0 FinneganScanNumber: 7578 MStype: enumIsNormalMS rawFile: 16H146_5_120M.raw
10	gi|872579507	elongation factor Tu [Marinovum algicola]	453	43169	49	7	10	3	3445	1	1	1	600.811	1199.61	2	1199.61	0.0006	0	24.31	58	K	FEAESYILTK	D					Elution from: 62.127 to 62.127 period: 0 experiment: 1 cycles: 1 precIntensity: 95787.0 FinneganScanNumber: 5578 MStype: enumIsNormalMS rawFile: 16H146_5_120M.raw
10	gi|872579507	elongation factor Tu [Marinovum algicola]	453	43169	49	7	10	3	3541	1	1	0	609.268	1216.52	2	1216.52	0.0006	0	25.21	16	K	TTCTGVEMFR	K	Oxidation (M)	0.0000000200.0			Elution from: 27.422 to 27.422 period: 0 experiment: 1 cycles: 1 precIntensity: 22815.0 FinneganScanNumber: 1930 MStype: enumIsNormalMS rawFile: 16H146_5_120M.raw
10	gi|872579507	elongation factor Tu [Marinovum algicola]	453	43169	49	7	10	3	4563	1	1	0	668.306	1334.6	2	1334.6	-0.0018	0	61.99	0.0094	R	AYDQIDGAPEEK	A					Elution from: 24.758 to 24.758 period: 0 experiment: 1 cycles: 1 precIntensity: 82936.0 FinneganScanNumber: 1667 MStype: enumIsNormalMS rawFile: 16H146_5_120M.raw
10	gi|872579507	elongation factor Tu [Marinovum algicola]	453	43169	49	7	10	3	4564	1	1	0	668.306	1334.6	2	1334.6	-0.001	0	41.37	1.1	R	AYDQIDGAPEEK	A					Elution from: 24.697 to 24.697 period: 0 experiment: 1 cycles: 1 precIntensity: 35032.0 FinneganScanNumber: 1661 MStype: enumIsNormalMS rawFile: 16H146_5_120M.raw
10	gi|872579507	elongation factor Tu [Marinovum algicola]	453	43169	49	7	10	3	4565	2	1	0	668.307	1334.6	2	1334.6	-0.0003	0	28.8	19	R	AYDQIDGAPEEK	A					Elution from: 27.282 to 27.282 period: 0 experiment: 1 cycles: 1 precIntensity: 15904.0 FinneganScanNumber: 1915 MStype: enumIsNormalMS rawFile: 16H146_5_120M.raw
10	gi|872579507	elongation factor Tu [Marinovum algicola]	453	43169	49	7	10	3	6344	8	1	0	561.644	1681.91	3	1681.91	-0.0024	1	29.57	23	K	LLDRGEAGDNIGALLR	G					Elution from: 75.537 to 75.537 period: 0 experiment: 1 cycles: 1 precIntensity: 45297.0 FinneganScanNumber: 6936 MStype: enumIsNormalMS rawFile: 16H146_5_120M.raw
10	gi|872579507	elongation factor Tu [Marinovum algicola]	453	43169	49	7	10	3	6345	2	1	0	561.644	1681.91	3	1681.91	-0.0024	1	31.29	16	K	LLDRGEAGDNIGALLR	G					Elution from: 75.612 to 75.612 period: 0 experiment: 1 cycles: 1 precIntensity: 32868.0 FinneganScanNumber: 6943 MStype: enumIsNormalMS rawFile: 16H146_5_120M.raw
10	gi|872579507	elongation factor Tu [Marinovum algicola]	453	43169	49	7	10	3	6415	1	1	1	851.927	1701.84	2	1701.84	-0.0007	0	20.31	320	K	ELMAAVDEYIPQPAR	A					Elution from: 88.782 to 88.782 period: 0 experiment: 1 cycles: 1 precIntensity: 16242.0 FinneganScanNumber: 8140 MStype: enumIsNormalMS rawFile: 16H146_5_120M.raw
10	gi|872579507	elongation factor Tu [Marinovum algicola]	453	43169	49	7	10	3	6621	2	1	0	888.942	1775.87	2	1775.87	-0.0003	0	46.62	0.75	R	GITISTAHVEYETEAR	H					Elution from: 52.167 to 52.167 period: 0 experiment: 1 cycles: 1 precIntensity: 54113.0 FinneganScanNumber: 4502 MStype: enumIsNormalMS rawFile: 16H146_5_120M.raw
10	gi|872579507	elongation factor Tu [Marinovum algicola]	453	43169	49	7	10	3	7900	1	1	1	831.4	2491.18	3	2491.18	-0.005	0	46.71	0.7	R	TTDVTGTVELPSGTEMVMPGDNLK	F					Elution from: 86.993 to 86.993 period: 0 experiment: 1 cycles: 1 precIntensity: 31041.0 FinneganScanNumber: 7982 MStype: enumIsNormalMS rawFile: 16H146_5_120M.raw
10	gi|872579507	elongation factor Tu [Marinovum algicola]	453	43169	49	7	10	3	7902	2	1	1	1246.6	2491.18	2	2491.18	-0.0014	0	63.48	0.015	R	TTDVTGTVELPSGTEMVMPGDNLK	F					Elution from: 109.667 to 109.667 period: 0 experiment: 1 cycles: 1 precIntensity: 273134.0 FinneganScanNumber: 9989 MStype: enumIsNormalMS rawFile: 16H146_5_120M.raw
10	gi|872579507	elongation factor Tu [Marinovum algicola]	453	43169	49	7	10	3	7903	1	1	1	1246.6	2491.18	2	2491.18	-0.0004	0	62	0.022	R	TTDVTGTVELPSGTEMVMPGDNLK	F					Elution from: 109.722 to 109.722 period: 0 experiment: 1 cycles: 1 precIntensity: 285389.0 FinneganScanNumber: 9995 MStype: enumIsNormalMS rawFile: 16H146_5_120M.raw
10	gi|872579507	elongation factor Tu [Marinovum algicola]	453	43169	49	7	10	3	7904	1	1	1	1246.6	2491.18	2	2491.18	-0.0002	0	65.78	0.009	R	TTDVTGTVELPSGTEMVMPGDNLK	F					Elution from: 86.923 to 86.923 period: 0 experiment: 1 cycles: 1 precIntensity: 46201.0 FinneganScanNumber: 7976 MStype: enumIsNormalMS rawFile: 16H146_5_120M.raw
10	gi|872579507	elongation factor Tu [Marinovum algicola]	453	43169	49	7	10	3	7905	2	1	1	831.402	2491.18	3	2491.18	0.0006	0	29.16	42	R	TTDVTGTVELPSGTEMVMPGDNLK	F					Elution from: 87.152 to 87.152 period: 0 experiment: 1 cycles: 1 precIntensity: 25916.0 FinneganScanNumber: 7996 MStype: enumIsNormalMS rawFile: 16H146_5_120M.raw
10	gi|872579507	elongation factor Tu [Marinovum algicola]	453	43169	49	7	10	3	7940	1	1	1	1254.59	2507.17	2	2507.18	-0.0058	0	32.18	18	R	TTDVTGTVELPSGTEMVMPGDNLK	F	Oxidation (M)	0.000000000000000002000000.0			Elution from: 87.762 to 87.762 period: 0 experiment: 1 cycles: 1 precIntensity: 11575.0 FinneganScanNumber: 8052 MStype: enumIsNormalMS rawFile: 16H146_5_120M.raw
10	gi|872579507	elongation factor Tu [Marinovum algicola]	453	43169	49	7	10	3	7941	2	1	1	1254.6	2507.18	2	2507.18	-0.0013	0	34.07	12	R	TTDVTGTVELPSGTEMVMPGDNLK	F	Oxidation (M)	0.000000000000000002000000.0			Elution from: 87.373 to 87.373 period: 0 experiment: 1 cycles: 1 precIntensity: 10484.0 FinneganScanNumber: 8016 MStype: enumIsNormalMS rawFile: 16H146_5_120M.raw
10	gi|872579507	elongation factor Tu [Marinovum algicola]	453	43169	49	7	10	3	7942	1	1	1	836.733	2507.18	3	2507.18	-0.0012	0	24.39	120	R	TTDVTGTVELPSGTEMVMPGDNLK	F	Oxidation (M)	0.000000000000000200000000.0			Elution from: 74.538 to 74.538 period: 0 experiment: 1 cycles: 1 precIntensity: 37305.0 FinneganScanNumber: 6841 MStype: enumIsNormalMS rawFile: 16H146_5_120M.raw
10	gi|872579507	elongation factor Tu [Marinovum algicola]	453	43169	49	7	10	3	7943	1	1	1	1254.6	2507.18	2	2507.18	0.0025	0	54.16	0.13	R	TTDVTGTVELPSGTEMVMPGDNLK	F	Oxidation (M)	0.000000000000000200000000.0			Elution from: 74.525 to 74.525 period: 0 experiment: 1 cycles: 1 precIntensity: 64254.0 FinneganScanNumber: 6840 MStype: enumIsNormalMS rawFile: 16H146_5_120M.raw
10	gi|872579507	elongation factor Tu [Marinovum algicola]	453	43169	49	7	10	3	7944	1	1	1	1254.6	2507.18	2	2507.18	0.0036	0	69.02	0.0042	R	TTDVTGTVELPSGTEMVMPGDNLK	F	Oxidation (M)	0.000000000000000200000000.0			Elution from: 74.488 to 74.488 period: 0 experiment: 1 cycles: 1 precIntensity: 54214.0 FinneganScanNumber: 6836 MStype: enumIsNormalMS rawFile: 16H146_5_120M.raw
10	gi|872579507	elongation factor Tu [Marinovum algicola]	453	43169	49	7	10	3	7945	1	1	1	1254.6	2507.18	2	2507.18	0.0044	0	32.41	19	R	TTDVTGTVELPSGTEMVMPGDNLK	F	Oxidation (M)	0.000000000000000002000000.0			Elution from: 87.945 to 87.945 period: 0 experiment: 1 cycles: 1 precIntensity: 10663.0 FinneganScanNumber: 8068 MStype: enumIsNormalMS rawFile: 16H146_5_120M.raw
10	gi|872579507	elongation factor Tu [Marinovum algicola]	453	43169	49	7	10	3	7946	1	1	1	1254.6	2507.18	2	2507.18	0.0053	0	37.32	6.3	R	TTDVTGTVELPSGTEMVMPGDNLK	F	Oxidation (M)	0.000000000000000002000000.0			Elution from: 87.898 to 87.898 period: 0 experiment: 1 cycles: 1 precIntensity: 11483.0 FinneganScanNumber: 8064 MStype: enumIsNormalMS rawFile: 16H146_5_120M.raw
10	gi|872579507	elongation factor Tu [Marinovum algicola]	453	43169	49	7	10	3	7954	2	1	1	842.064	2523.17	3	2523.17	-0.0003	0	28.69	38	R	TTDVTGTVELPSGTEMVMPGDNLK	F	2 Oxidation (M)	0.000000000000000202000000.0			Elution from: 64.078 to 64.078 period: 0 experiment: 1 cycles: 1 precIntensity: 89338.0 FinneganScanNumber: 5781 MStype: enumIsNormalMS rawFile: 16H146_5_120M.raw
10	gi|872579507	elongation factor Tu [Marinovum algicola]	453	43169	49	7	10	3	7956	2	1	1	842.066	2523.18	3	2523.17	0.0049	0	22.17	180	R	TTDVTGTVELPSGTEMVMPGDNLK	F	2 Oxidation (M)	0.000000000000000202000000.0			Elution from: 64.028 to 64.028 period: 0 experiment: 1 cycles: 1 precIntensity: 104554.0 FinneganScanNumber: 5776 MStype: enumIsNormalMS rawFile: 16H146_5_120M.raw
10	gi|872579507	elongation factor Tu [Marinovum algicola]	453	43169	49	7	10	3	8080	1	1	0	925.447	2773.32	3	2773.32	0.0001	0	32.52	20	K	NMITGAAQMDGAILVVNAADGPMPQTR	E	2 Oxidation (M)	0.000000002000000000000020000.0			Elution from: 110.380 to 110.380 period: 0 experiment: 1 cycles: 1 precIntensity: 69819.0 FinneganScanNumber: 10059 MStype: enumIsNormalMS rawFile: 16H146_5_120M.raw
10	gi|872579507	elongation factor Tu [Marinovum algicola]	453	43169	49	7	10	3	8081	1	1	0	925.447	2773.32	3	2773.32	0.0002	0	25.07	110	K	NMITGAAQMDGAILVVNAADGPMPQTR	E	2 Oxidation (M)	0.000000002000000000000020000.0			Elution from: 110.237 to 110.237 period: 0 experiment: 1 cycles: 1 precIntensity: 64740.0 FinneganScanNumber: 10045 MStype: enumIsNormalMS rawFile: 16H146_5_120M.raw
11	gi|872571481	tricarboxylate transporter [Marinovum algicola]	432	38608	34	8	10	1	2189	4	1	1	483.238	964.461	2	964.461	-0.0003	0	26.82	58	K	FDGSANNLK	D					Elution from: 16.830 to 16.830 period: 0 experiment: 1 cycles: 1 precIntensity: 42381.0 FinneganScanNumber: 906 MStype: enumIsNormalMS rawFile: 16H146_5_120M.raw
11	gi|872571481	tricarboxylate transporter [Marinovum algicola]	432	38608	34	8	10	1	2190	8	1	1	483.238	964.461	2	964.461	0	0	22.57	160	K	FDGSANNLK	D					Elution from: 16.870 to 16.870 period: 0 experiment: 1 cycles: 1 precIntensity: 39491.0 FinneganScanNumber: 910 MStype: enumIsNormalMS rawFile: 16H146_5_120M.raw
11	gi|872571481	tricarboxylate transporter [Marinovum algicola]	432	38608	34	8	10	1	3213	2	1	1	583.304	1164.59	2	1164.59	0.001	0	29.69	29	K	YPVFVGEGAAR	A					Elution from: 48.188 to 48.188 period: 0 experiment: 1 cycles: 1 precIntensity: 27007.0 FinneganScanNumber: 4081 MStype: enumIsNormalMS rawFile: 16H146_5_120M.raw
11	gi|872571481	tricarboxylate transporter [Marinovum algicola]	432	38608	34	8	10	1	3572	1	1	0	612.842	1223.67	2	1223.67	-0.0008	0	23.32	61	K	AFFIAGFPVQK	I					Elution from: 92.882 to 92.882 period: 0 experiment: 1 cycles: 1 precIntensity: 20273.0 FinneganScanNumber: 8500 MStype: enumIsNormalMS rawFile: 16H146_5_120M.raw
11	gi|872571481	tricarboxylate transporter [Marinovum algicola]	432	38608	34	8	10	1	3724	4	1	1	625.312	1248.61	2	1248.61	-0.001	1	36.89	5.5	R	NRDDFAEIAAK	R					Elution from: 35.337 to 35.337 period: 0 experiment: 1 cycles: 1 precIntensity: 75417.0 FinneganScanNumber: 2730 MStype: enumIsNormalMS rawFile: 16H146_5_120M.raw
11	gi|872571481	tricarboxylate transporter [Marinovum algicola]	432	38608	34	8	10	1	3725	1	1	1	625.312	1248.61	2	1248.61	-0.0005	1	53.64	0.11	R	NRDDFAEIAAK	R					Elution from: 35.280 to 35.280 period: 0 experiment: 1 cycles: 1 precIntensity: 81052.0 FinneganScanNumber: 2724 MStype: enumIsNormalMS rawFile: 16H146_5_120M.raw
11	gi|872571481	tricarboxylate transporter [Marinovum algicola]	432	38608	34	8	10	1	3727	1	1	1	625.312	1248.61	2	1248.61	-0.0005	1	47.27	0.48	R	NRDDFAEIAAK	R					Elution from: 33.290 to 33.290 period: 0 experiment: 1 cycles: 1 precIntensity: 46174.0 FinneganScanNumber: 2519 MStype: enumIsNormalMS rawFile: 16H146_5_120M.raw
11	gi|872571481	tricarboxylate transporter [Marinovum algicola]	432	38608	34	8	10	1	3728	1	1	1	625.312	1248.61	2	1248.61	-0.0003	1	27.81	43	R	NRDDFAEIAAK	R					Elution from: 33.152 to 33.152 period: 0 experiment: 1 cycles: 1 precIntensity: 34186.0 FinneganScanNumber: 2505 MStype: enumIsNormalMS rawFile: 16H146_5_120M.raw
11	gi|872571481	tricarboxylate transporter [Marinovum algicola]	432	38608	34	8	10	1	3729	3	1	1	625.312	1248.61	2	1248.61	0.0001	1	28.9	31	R	NRDDFAEIAAK	R					Elution from: 39.187 to 39.187 period: 0 experiment: 1 cycles: 1 precIntensity: 42917.0 FinneganScanNumber: 3120 MStype: enumIsNormalMS rawFile: 16H146_5_120M.raw
11	gi|872571481	tricarboxylate transporter [Marinovum algicola]	432	38608	34	8	10	1	3730	4	1	1	625.312	1248.61	2	1248.61	0.0001	1	31.78	16	R	NRDDFAEIAAK	R					Elution from: 39.123 to 39.123 period: 0 experiment: 1 cycles: 1 precIntensity: 48843.0 FinneganScanNumber: 3113 MStype: enumIsNormalMS rawFile: 16H146_5_120M.raw
11	gi|872571481	tricarboxylate transporter [Marinovum algicola]	432	38608	34	8	10	1	4822	1	1	1	686.366	1370.72	2	1370.72	-0.0019	0	28.91	35	K	IAFLPAGTPDDVR	E					Elution from: 69.718 to 69.718 period: 0 experiment: 1 cycles: 1 precIntensity: 35863.0 FinneganScanNumber: 6360 MStype: enumIsNormalMS rawFile: 16H146_5_120M.raw
11	gi|872571481	tricarboxylate transporter [Marinovum algicola]	432	38608	34	8	10	1	4823	1	1	1	686.366	1370.72	2	1370.72	-0.0019	0	20.87	220	K	IAFLPAGTPDDVR	E					Elution from: 69.650 to 69.650 period: 0 experiment: 1 cycles: 1 precIntensity: 51041.0 FinneganScanNumber: 6353 MStype: enumIsNormalMS rawFile: 16H146_5_120M.raw
11	gi|872571481	tricarboxylate transporter [Marinovum algicola]	432	38608	34	8	10	1	4824	2	1	1	686.367	1370.72	2	1370.72	-0.0006	0	21.09	210	K	IAFLPAGTPDDVR	E					Elution from: 69.483 to 69.483 period: 0 experiment: 1 cycles: 1 precIntensity: 60830.0 FinneganScanNumber: 6337 MStype: enumIsNormalMS rawFile: 16H146_5_120M.raw
11	gi|872571481	tricarboxylate transporter [Marinovum algicola]	432	38608	34	8	10	1	4826	1	1	1	686.367	1370.72	2	1370.72	-0.0001	0	24.2	100	K	IAFLPAGTPDDVR	E					Elution from: 112.967 to 112.967 period: 0 experiment: 1 cycles: 1 precIntensity: 49674.0 FinneganScanNumber: 10339 MStype: enumIsNormalMS rawFile: 16H146_5_120M.raw
11	gi|872571481	tricarboxylate transporter [Marinovum algicola]	432	38608	34	8	10	1	5321	5	1	1	721.849	1441.68	2	1441.68	-0.0009	0	35.76	5.3	K	DIDFIYGSQGATR	L					Elution from: 61.550 to 61.550 period: 0 experiment: 1 cycles: 1 precIntensity: 60923.0 FinneganScanNumber: 5514 MStype: enumIsNormalMS rawFile: 16H146_5_120M.raw
11	gi|872571481	tricarboxylate transporter [Marinovum algicola]	432	38608	34	8	10	1	5350	1	1	1	483.933	1448.78	3	1448.78	-0.0011	1	33.27	11	R	VGKYPVFVGEGAAR	A					Elution from: 48.017 to 48.017 period: 0 experiment: 1 cycles: 1 precIntensity: 71737.0 FinneganScanNumber: 4062 MStype: enumIsNormalMS rawFile: 16H146_5_120M.raw
11	gi|872571481	tricarboxylate transporter [Marinovum algicola]	432	38608	34	8	10	1	6870	1	1	1	923.446	1844.88	2	1844.88	-0.0009	0	61.43	0.021	R	GEATIDYQTSSAYLGAAK	D					Elution from: 63.058 to 63.058 period: 0 experiment: 1 cycles: 1 precIntensity: 40335.0 FinneganScanNumber: 5675 MStype: enumIsNormalMS rawFile: 16H146_5_120M.raw
11	gi|872571481	tricarboxylate transporter [Marinovum algicola]	432	38608	34	8	10	1	6871	1	1	1	923.447	1844.88	2	1844.88	-0.0003	0	102.45	1.6e-06	R	GEATIDYQTSSAYLGAAK	D					Elution from: 60.955 to 60.955 period: 0 experiment: 1 cycles: 1 precIntensity: 13842.0 FinneganScanNumber: 5445 MStype: enumIsNormalMS rawFile: 16H146_5_120M.raw
11	gi|872571481	tricarboxylate transporter [Marinovum algicola]	432	38608	34	8	10	1	6872	1	1	1	923.447	1844.88	2	1844.88	-0.0002	0	68.47	0.0041	R	GEATIDYQTSSAYLGAAK	D					Elution from: 72.173 to 72.173 period: 0 experiment: 1 cycles: 1 precIntensity: 27674.0 FinneganScanNumber: 6607 MStype: enumIsNormalMS rawFile: 16H146_5_120M.raw
11	gi|872571481	tricarboxylate transporter [Marinovum algicola]	432	38608	34	8	10	1	6874	1	1	1	923.447	1844.88	2	1844.88	0.0002	0	30.82	24	R	GEATIDYQTSSAYLGAAK	D					Elution from: 74.910 to 74.910 period: 0 experiment: 1 cycles: 1 precIntensity: 17665.0 FinneganScanNumber: 6877 MStype: enumIsNormalMS rawFile: 16H146_5_120M.raw
11	gi|872571481	tricarboxylate transporter [Marinovum algicola]	432	38608	34	8	10	1	6875	1	1	1	923.447	1844.88	2	1844.88	0.0006	0	63.42	0.013	R	GEATIDYQTSSAYLGAAK	D					Elution from: 60.997 to 60.997 period: 0 experiment: 1 cycles: 1 precIntensity: 58701.0 FinneganScanNumber: 5449 MStype: enumIsNormalMS rawFile: 16H146_5_120M.raw
11	gi|872571481	tricarboxylate transporter [Marinovum algicola]	432	38608	34	8	10	1	6876	1	1	1	923.448	1844.88	2	1844.88	0.0024	0	69.52	0.0035	R	GEATIDYQTSSAYLGAAK	D					Elution from: 78.048 to 78.048 period: 0 experiment: 1 cycles: 1 precIntensity: 32950.0 FinneganScanNumber: 7173 MStype: enumIsNormalMS rawFile: 16H146_5_120M.raw
11	gi|872571481	tricarboxylate transporter [Marinovum algicola]	432	38608	34	8	10	1	6877	1	1	1	923.448	1844.88	2	1844.88	0.0027	0	116.82	6.4e-08	R	GEATIDYQTSSAYLGAAK	D					Elution from: 58.863 to 58.863 period: 0 experiment: 1 cycles: 1 precIntensity: 103464.0 FinneganScanNumber: 5221 MStype: enumIsNormalMS rawFile: 16H146_5_120M.raw
11	gi|872571481	tricarboxylate transporter [Marinovum algicola]	432	38608	34	8	10	1	6878	1	1	1	923.448	1844.88	2	1844.88	0.0028	0	46.24	0.66	R	GEATIDYQTSSAYLGAAK	D					Elution from: 80.862 to 80.862 period: 0 experiment: 1 cycles: 1 precIntensity: 21288.0 FinneganScanNumber: 7431 MStype: enumIsNormalMS rawFile: 16H146_5_120M.raw
11	gi|872571481	tricarboxylate transporter [Marinovum algicola]	432	38608	34	8	10	1	6879	1	1	1	923.449	1844.88	2	1844.88	0.0034	0	111.46	2.1e-07	R	GEATIDYQTSSAYLGAAK	D					Elution from: 58.922 to 58.922 period: 0 experiment: 1 cycles: 1 precIntensity: 93915.0 FinneganScanNumber: 5227 MStype: enumIsNormalMS rawFile: 16H146_5_120M.raw
11	gi|872571481	tricarboxylate transporter [Marinovum algicola]	432	38608	34	8	10	1	6880	1	1	1	923.449	1844.88	2	1844.88	0.0035	0	72.18	0.0018	R	GEATIDYQTSSAYLGAAK	D					Elution from: 68.750 to 68.750 period: 0 experiment: 1 cycles: 1 precIntensity: 41205.0 FinneganScanNumber: 6265 MStype: enumIsNormalMS rawFile: 16H146_5_120M.raw
11	gi|872571481	tricarboxylate transporter [Marinovum algicola]	432	38608	34	8	10	1	6881	1	1	1	923.449	1844.88	2	1844.88	0.0038	0	40.2	2.8	R	GEATIDYQTSSAYLGAAK	D					Elution from: 77.067 to 77.067 period: 0 experiment: 1 cycles: 1 precIntensity: 25712.0 FinneganScanNumber: 7082 MStype: enumIsNormalMS rawFile: 16H146_5_120M.raw
11	gi|872571481	tricarboxylate transporter [Marinovum algicola]	432	38608	34	8	10	1	6882	1	1	1	923.449	1844.88	2	1844.88	0.0038	0	56.41	0.068	R	GEATIDYQTSSAYLGAAK	D					Elution from: 65.885 to 65.885 period: 0 experiment: 1 cycles: 1 precIntensity: 32160.0 FinneganScanNumber: 5969 MStype: enumIsNormalMS rawFile: 16H146_5_120M.raw
11	gi|872571481	tricarboxylate transporter [Marinovum algicola]	432	38608	34	8	10	1	6884	1	1	1	923.449	1844.88	2	1844.88	0.0041	0	56.13	0.071	R	GEATIDYQTSSAYLGAAK	D					Elution from: 68.617 to 68.617 period: 0 experiment: 1 cycles: 1 precIntensity: 11255.0 FinneganScanNumber: 6252 MStype: enumIsNormalMS rawFile: 16H146_5_120M.raw
11	gi|872571481	tricarboxylate transporter [Marinovum algicola]	432	38608	34	8	10	1	6885	1	1	1	923.451	1844.89	2	1844.88	0.0081	0	51.84	0.2	R	GEATIDYQTSSAYLGAAK	D					Elution from: 63.252 to 63.252 period: 0 experiment: 1 cycles: 1 precIntensity: 36341.0 FinneganScanNumber: 5695 MStype: enumIsNormalMS rawFile: 16H146_5_120M.raw
11	gi|872571481	tricarboxylate transporter [Marinovum algicola]	432	38608	34	8	10	1	6886	1	1	1	923.452	1844.89	2	1844.88	0.0092	0	48.38	0.44	R	GEATIDYQTSSAYLGAAK	D					Elution from: 78.753 to 78.753 period: 0 experiment: 1 cycles: 1 precIntensity: 13369.0 FinneganScanNumber: 7237 MStype: enumIsNormalMS rawFile: 16H146_5_120M.raw
11	gi|872571481	tricarboxylate transporter [Marinovum algicola]	432	38608	34	8	10	1	7823	1	1	1	797.052	2388.13	3	2388.13	-0.0014	1	27.96	53	K	FDGSANNLKDIDFIYGSQGATR	L					Elution from: 83.343 to 83.343 period: 0 experiment: 1 cycles: 1 precIntensity: 33000.0 FinneganScanNumber: 7659 MStype: enumIsNormalMS rawFile: 16H146_5_120M.raw
11	gi|872571481	tricarboxylate transporter [Marinovum algicola]	432	38608	34	8	10	1	7824	1	1	1	797.053	2388.14	3	2388.13	0.0015	1	33.31	16	K	FDGSANNLKDIDFIYGSQGATR	L					Elution from: 83.247 to 83.247 period: 0 experiment: 1 cycles: 1 precIntensity: 20801.0 FinneganScanNumber: 7649 MStype: enumIsNormalMS rawFile: 16H146_5_120M.raw
11	gi|872571481	tricarboxylate transporter [Marinovum algicola]	432	38608	34	8	10	1	7994	1	1	1	861.809	2582.4	3	2582.4	0.0043	0	50.51	0.14	R	LDLVPLLAWQMLGMNVEPVFGIK	G					Elution from: 117.102 to 117.102 period: 0 experiment: 1 cycles: 1 precIntensity: 130622.0 FinneganScanNumber: 10793 MStype: enumIsNormalMS rawFile: 16H146_5_120M.raw
12	gi|872579724	transporter [Marinovum algicola]	396	33957	14	7	6	3	2818	2	1	1	546.308	1090.6	2	1090.6	-0.0012	0	24.94	79	R	VALYQDAIAK	M					Elution from: 53.132 to 53.132 period: 0 experiment: 1 cycles: 1 precIntensity: 39343.0 FinneganScanNumber: 4604 MStype: enumIsNormalMS rawFile: 16H146_5_120M.raw
12	gi|872579724	transporter [Marinovum algicola]	396	33957	14	7	6	3	2819	2	1	1	546.308	1090.6	2	1090.6	-0.0012	0	23.03	120	R	VALYQDAIAK	M					Elution from: 46.968 to 46.968 period: 0 experiment: 1 cycles: 1 precIntensity: 34014.0 FinneganScanNumber: 3950 MStype: enumIsNormalMS rawFile: 16H146_5_120M.raw
12	gi|872579724	transporter [Marinovum algicola]	396	33957	14	7	6	3	2821	1	1	1	546.308	1090.6	2	1090.6	-0.0003	0	51.42	0.17	R	VALYQDAIAK	M					Elution from: 42.522 to 42.522 period: 0 experiment: 1 cycles: 1 precIntensity: 125494.0 FinneganScanNumber: 3478 MStype: enumIsNormalMS rawFile: 16H146_5_120M.raw
12	gi|872579724	transporter [Marinovum algicola]	396	33957	14	7	6	3	2865	1	1	1	552.309	1102.6	2	1102.61	-0.0011	0	80.86	0.00019	K	AMAALLSGEIK	A					Elution from: 116.218 to 116.218 period: 0 experiment: 1 cycles: 1 precIntensity: 565463.0 FinneganScanNumber: 10668 MStype: enumIsNormalMS rawFile: 16H146_5_120M.raw
12	gi|872579724	transporter [Marinovum algicola]	396	33957	14	7	6	3	2866	1	1	1	552.31	1102.61	2	1102.61	0.0001	0	66.92	0.0044	K	AMAALLSGEIK	A					Elution from: 66.900 to 66.900 period: 0 experiment: 1 cycles: 1 precIntensity: 54220.0 FinneganScanNumber: 6076 MStype: enumIsNormalMS rawFile: 16H146_5_120M.raw
12	gi|872579724	transporter [Marinovum algicola]	396	33957	14	7	6	3	3295	1	1	1	591.279	1180.54	2	1180.54	-0.0007	0	42.92	0.81	R	VDAYADAPTMK	E					Elution from: 30.022 to 30.022 period: 0 experiment: 1 cycles: 1 precIntensity: 64385.0 FinneganScanNumber: 2187 MStype: enumIsNormalMS rawFile: 16H146_5_120M.raw
12	gi|872579724	transporter [Marinovum algicola]	396	33957	14	7	6	3	3296	1	1	1	591.279	1180.54	2	1180.54	-0.0002	0	64.5	0.0054	R	VDAYADAPTMK	E					Elution from: 30.085 to 30.085 period: 0 experiment: 1 cycles: 1 precIntensity: 107524.0 FinneganScanNumber: 2194 MStype: enumIsNormalMS rawFile: 16H146_5_120M.raw
12	gi|872579724	transporter [Marinovum algicola]	396	33957	14	7	6	3	5153	1	1	1	706.81	1411.61	2	1411.61	-0.0022	0	45.11	0.24	K	MYDTPEWEAVR	A	Oxidation (M)	0.20000000000.0			Elution from: 54.608 to 54.608 period: 0 experiment: 1 cycles: 1 precIntensity: 99857.0 FinneganScanNumber: 4768 MStype: enumIsNormalMS rawFile: 16H146_5_120M.raw
12	gi|872579724	transporter [Marinovum algicola]	396	33957	14	7	6	3	5154	1	1	1	706.811	1411.61	2	1411.61	-0.0004	0	39.22	0.93	K	MYDTPEWEAVR	A	Oxidation (M)	0.20000000000.0			Elution from: 54.552 to 54.552 period: 0 experiment: 1 cycles: 1 precIntensity: 114189.0 FinneganScanNumber: 4762 MStype: enumIsNormalMS rawFile: 16H146_5_120M.raw
12	gi|872579724	transporter [Marinovum algicola]	396	33957	14	7	6	3	5547	1	1	1	747.372	1492.73	2	1492.73	-0.001	0	41.87	1.9	K	EQGIETTFINWR	G					Elution from: 87.073 to 87.073 period: 0 experiment: 1 cycles: 1 precIntensity: 20076.0 FinneganScanNumber: 7989 MStype: enumIsNormalMS rawFile: 16H146_5_120M.raw
12	gi|872579724	transporter [Marinovum algicola]	396	33957	14	7	6	3	6350	1	1	1	842.883	1683.75	2	1683.75	-0.0005	0	92	9.2e-06	K	AGLAGTASYENMSGGGGGK	A					Elution from: 36.557 to 36.557 period: 0 experiment: 1 cycles: 1 precIntensity: 76239.0 FinneganScanNumber: 2850 MStype: enumIsNormalMS rawFile: 16H146_5_120M.raw
12	gi|872579724	transporter [Marinovum algicola]	396	33957	14	7	6	3	6351	1	1	1	842.884	1683.75	2	1683.75	0.0015	0	62.04	0.0084	K	AGLAGTASYENMSGGGGGK	A					Elution from: 36.512 to 36.512 period: 0 experiment: 1 cycles: 1 precIntensity: 48918.0 FinneganScanNumber: 2845 MStype: enumIsNormalMS rawFile: 16H146_5_120M.raw
12	gi|872579724	transporter [Marinovum algicola]	396	33957	14	7	6	3	6400	1	1	1	850.88	1699.75	2	1699.75	-0.0011	0	112.46	5.8e-08	K	AGLAGTASYENMSGGGGGK	A	Oxidation (M)	0.0000000000020000000.0			Elution from: 22.695 to 22.695 period: 0 experiment: 1 cycles: 1 precIntensity: 34461.0 FinneganScanNumber: 1468 MStype: enumIsNormalMS rawFile: 16H146_5_120M.raw
12	gi|872579724	transporter [Marinovum algicola]	396	33957	14	7	6	3	6401	1	1	1	850.882	1699.75	2	1699.75	0.003	0	61.96	0.0077	K	AGLAGTASYENMSGGGGGK	A	Oxidation (M)	0.0000000000020000000.0			Elution from: 22.653 to 22.653 period: 0 experiment: 1 cycles: 1 precIntensity: 19164.0 FinneganScanNumber: 1464 MStype: enumIsNormalMS rawFile: 16H146_5_120M.raw
13	gi|921086142	hypothetical protein [Marinovum algicola]	385	55216	44	24	7	3	2581	2	1	1	525.782	1049.55	2	1049.55	-0.0004	0	25.62	84	R	EAPAITHSPK	V					Elution from: 17.538 to 17.538 period: 0 experiment: 1 cycles: 1 precIntensity: 54614.0 FinneganScanNumber: 974 MStype: enumIsNormalMS rawFile: 16H146_5_120M.raw
13	gi|921086142	hypothetical protein [Marinovum algicola]	385	55216	44	24	7	3	2585	1	1	1	525.783	1049.55	2	1049.55	0.0004	0	24.63	110	R	EAPAITHSPK	V					Elution from: 13.270 to 13.270 period: 0 experiment: 1 cycles: 1 precIntensity: 9819.0 FinneganScanNumber: 598 MStype: enumIsNormalMS rawFile: 16H146_5_120M.raw
13	gi|921086142	hypothetical protein [Marinovum algicola]	385	55216	44	24	7	3	2586	1	1	1	525.783	1049.55	2	1049.55	0.0004	0	41.9	2	R	EAPAITHSPK	V					Elution from: 15.342 to 15.342 period: 0 experiment: 1 cycles: 1 precIntensity: 138305.0 FinneganScanNumber: 775 MStype: enumIsNormalMS rawFile: 16H146_5_120M.raw
13	gi|921086142	hypothetical protein [Marinovum algicola]	385	55216	44	24	7	3	2588	1	1	1	525.783	1049.55	2	1049.55	0.0007	0	29.66	33	R	EAPAITHSPK	V					Elution from: 13.305 to 13.305 period: 0 experiment: 1 cycles: 1 precIntensity: 25957.0 FinneganScanNumber: 601 MStype: enumIsNormalMS rawFile: 16H146_5_120M.raw
13	gi|921086142	hypothetical protein [Marinovum algicola]	385	55216	44	24	7	3	2589	1	1	1	525.783	1049.55	2	1049.55	0.0012	0	39.78	3.2	R	EAPAITHSPK	V					Elution from: 15.408 to 15.408 period: 0 experiment: 1 cycles: 1 precIntensity: 166002.0 FinneganScanNumber: 782 MStype: enumIsNormalMS rawFile: 16H146_5_120M.raw
13	gi|921086142	hypothetical protein [Marinovum algicola]	385	55216	44	24	7	3	2967	1	1	1	562.29	1122.57	2	1122.57	-0.0013	0	34.47	8.9	R	YSLNVVTGDR	R					Elution from: 46.138 to 46.138 period: 0 experiment: 1 cycles: 1 precIntensity: 70425.0 FinneganScanNumber: 3864 MStype: enumIsNormalMS rawFile: 16H146_5_120M.raw
13	gi|921086142	hypothetical protein [Marinovum algicola]	385	55216	44	24	7	3	2969	1	1	1	562.291	1122.57	2	1122.57	0.0009	0	46.35	0.51	R	YSLNVVTGDR	R					Elution from: 46.068 to 46.068 period: 0 experiment: 1 cycles: 1 precIntensity: 54494.0 FinneganScanNumber: 3857 MStype: enumIsNormalMS rawFile: 16H146_5_120M.raw
13	gi|921086142	hypothetical protein [Marinovum algicola]	385	55216	44	24	7	3	3732	1	1	1	625.779	1249.54	2	1249.54	-0.0013	0	57.86	0.013	K	VDGTDFYMFR	S					Elution from: 116.303 to 116.303 period: 0 experiment: 1 cycles: 1 precIntensity: 419080.0 FinneganScanNumber: 10682 MStype: enumIsNormalMS rawFile: 16H146_5_120M.raw
13	gi|921086142	hypothetical protein [Marinovum algicola]	385	55216	44	24	7	3	3733	1	1	1	625.779	1249.54	2	1249.54	-0.0008	0	50.54	0.065	K	VDGTDFYMFR	S					Elution from: 77.472 to 77.472 period: 0 experiment: 1 cycles: 1 precIntensity: 36858.0 FinneganScanNumber: 7122 MStype: enumIsNormalMS rawFile: 16H146_5_120M.raw
13	gi|921086142	hypothetical protein [Marinovum algicola]	385	55216	44	24	7	3	3734	1	1	1	625.779	1249.54	2	1249.54	-0.0004	0	27.64	17	K	VDGTDFYMFR	S					Elution from: 77.405 to 77.405 period: 0 experiment: 1 cycles: 1 precIntensity: 20808.0 FinneganScanNumber: 7116 MStype: enumIsNormalMS rawFile: 16H146_5_120M.raw
13	gi|921086142	hypothetical protein [Marinovum algicola]	385	55216	44	24	7	3	3847	1	1	1	633.777	1265.54	2	1265.54	0.0005	0	29.93	8.2	K	VDGTDFYMFR	S	Oxidation (M)	0.0000000200.0			Elution from: 61.865 to 61.865 period: 0 experiment: 1 cycles: 1 precIntensity: 67154.0 FinneganScanNumber: 5548 MStype: enumIsNormalMS rawFile: 16H146_5_120M.raw
13	gi|921086142	hypothetical protein [Marinovum algicola]	385	55216	44	24	7	3	3848	1	1	1	633.777	1265.54	2	1265.54	0.001	0	51.96	0.054	K	VDGTDFYMFR	S	Oxidation (M)	0.0000000200.0			Elution from: 61.963 to 61.963 period: 0 experiment: 1 cycles: 1 precIntensity: 133980.0 FinneganScanNumber: 5559 MStype: enumIsNormalMS rawFile: 16H146_5_120M.raw
13	gi|921086142	hypothetical protein [Marinovum algicola]	385	55216	44	24	7	3	3995	2	1	1	427.23	1278.67	3	1278.67	0.0003	1	20.59	200	R	YSLNVVTGDRR	S					Elution from: 40.077 to 40.077 period: 0 experiment: 1 cycles: 1 precIntensity: 59657.0 FinneganScanNumber: 3214 MStype: enumIsNormalMS rawFile: 16H146_5_120M.raw
13	gi|921086142	hypothetical protein [Marinovum algicola]	385	55216	44	24	7	3	3997	1	1	1	427.23	1278.67	3	1278.67	0.0009	1	34.82	7.4	R	YSLNVVTGDRR	S					Elution from: 39.952 to 39.952 period: 0 experiment: 1 cycles: 1 precIntensity: 76672.0 FinneganScanNumber: 3202 MStype: enumIsNormalMS rawFile: 16H146_5_120M.raw
13	gi|921086142	hypothetical protein [Marinovum algicola]	385	55216	44	24	7	3	5994	1	1	1	798.428	1594.84	2	1594.84	-0.0021	0	38.98	3.3	R	QALGASSNIAPSNIPR	D					Elution from: 47.563 to 47.563 period: 0 experiment: 1 cycles: 1 precIntensity: 50483.0 FinneganScanNumber: 4013 MStype: enumIsNormalMS rawFile: 16H146_5_120M.raw
13	gi|921086142	hypothetical protein [Marinovum algicola]	385	55216	44	24	7	3	5996	1	1	1	798.429	1594.84	2	1594.84	0.0009	0	79.23	0.00029	R	QALGASSNIAPSNIPR	D					Elution from: 47.625 to 47.625 period: 0 experiment: 1 cycles: 1 precIntensity: 79592.0 FinneganScanNumber: 4019 MStype: enumIsNormalMS rawFile: 16H146_5_120M.raw
13	gi|921086142	hypothetical protein [Marinovum algicola]	385	55216	44	24	7	3	6643	1	1	1	895.415	1788.82	2	1788.82	-0.0078	0	21.8	120	K	TAGQVSGAGDATVNEQER	Y					Elution from: 72.765 to 72.765 period: 0 experiment: 1 cycles: 1 precIntensity: 21718.0 FinneganScanNumber: 6668 MStype: enumIsNormalMS rawFile: 16H146_5_120M.raw
13	gi|921086142	hypothetical protein [Marinovum algicola]	385	55216	44	24	7	3	6644	1	1	1	895.417	1788.82	2	1788.82	-0.0041	0	75.54	0.00052	K	TAGQVSGAGDATVNEQER	Y					Elution from: 38.437 to 38.437 period: 0 experiment: 1 cycles: 1 precIntensity: 21678.0 FinneganScanNumber: 3044 MStype: enumIsNormalMS rawFile: 16H146_5_120M.raw
13	gi|921086142	hypothetical protein [Marinovum algicola]	385	55216	44	24	7	3	6645	1	1	1	895.418	1788.82	2	1788.82	-0.0034	0	67.98	0.0031	K	TAGQVSGAGDATVNEQER	Y					Elution from: 92.977 to 92.977 period: 0 experiment: 1 cycles: 1 precIntensity: 6705.0 FinneganScanNumber: 8508 MStype: enumIsNormalMS rawFile: 16H146_5_120M.raw
13	gi|921086142	hypothetical protein [Marinovum algicola]	385	55216	44	24	7	3	6646	1	1	1	895.418	1788.82	2	1788.82	-0.0026	0	92.35	1.2e-05	K	TAGQVSGAGDATVNEQER	Y					Elution from: 35.798 to 35.798 period: 0 experiment: 1 cycles: 1 precIntensity: 21315.0 FinneganScanNumber: 2775 MStype: enumIsNormalMS rawFile: 16H146_5_120M.raw
13	gi|921086142	hypothetical protein [Marinovum algicola]	385	55216	44	24	7	3	6647	1	1	1	895.419	1788.82	2	1788.82	-0.0009	0	63.29	0.0096	K	TAGQVSGAGDATVNEQER	Y					Elution from: 40.398 to 40.398 period: 0 experiment: 1 cycles: 1 precIntensity: 23550.0 FinneganScanNumber: 3246 MStype: enumIsNormalMS rawFile: 16H146_5_120M.raw
13	gi|921086142	hypothetical protein [Marinovum algicola]	385	55216	44	24	7	3	6648	1	1	1	895.419	1788.82	2	1788.82	-0.0002	0	91.76	1.4e-05	K	TAGQVSGAGDATVNEQER	Y					Elution from: 33.417 to 33.417 period: 0 experiment: 1 cycles: 1 precIntensity: 17740.0 FinneganScanNumber: 2532 MStype: enumIsNormalMS rawFile: 16H146_5_120M.raw
13	gi|921086142	hypothetical protein [Marinovum algicola]	385	55216	44	24	7	3	6649	1	1	1	895.419	1788.82	2	1788.82	-0.0001	0	78.45	0.00029	K	TAGQVSGAGDATVNEQER	Y					Elution from: 26.735 to 26.735 period: 0 experiment: 1 cycles: 1 precIntensity: 34089.0 FinneganScanNumber: 1861 MStype: enumIsNormalMS rawFile: 16H146_5_120M.raw
13	gi|921086142	hypothetical protein [Marinovum algicola]	385	55216	44	24	7	3	6650	1	1	1	895.419	1788.82	2	1788.82	-0.0001	0	76.96	0.00041	K	TAGQVSGAGDATVNEQER	Y					Elution from: 41.010 to 41.010 period: 0 experiment: 1 cycles: 1 precIntensity: 28042.0 FinneganScanNumber: 3312 MStype: enumIsNormalMS rawFile: 16H146_5_120M.raw
13	gi|921086142	hypothetical protein [Marinovum algicola]	385	55216	44	24	7	3	6651	1	1	1	895.419	1788.82	2	1788.82	0.0001	0	87.72	3.5e-05	K	TAGQVSGAGDATVNEQER	Y					Elution from: 31.167 to 31.167 period: 0 experiment: 1 cycles: 1 precIntensity: 18050.0 FinneganScanNumber: 2302 MStype: enumIsNormalMS rawFile: 16H146_5_120M.raw
13	gi|921086142	hypothetical protein [Marinovum algicola]	385	55216	44	24	7	3	6652	1	1	1	895.42	1788.82	2	1788.82	0.0008	0	67.18	0.0039	K	TAGQVSGAGDATVNEQER	Y					Elution from: 35.695 to 35.695 period: 0 experiment: 1 cycles: 1 precIntensity: 13180.0 FinneganScanNumber: 2765 MStype: enumIsNormalMS rawFile: 16H146_5_120M.raw
13	gi|921086142	hypothetical protein [Marinovum algicola]	385	55216	44	24	7	3	6653	1	1	1	895.42	1788.82	2	1788.82	0.0011	0	90.28	1.9e-05	K	TAGQVSGAGDATVNEQER	Y					Elution from: 24.638 to 24.638 period: 0 experiment: 1 cycles: 1 precIntensity: 25600.0 FinneganScanNumber: 1656 MStype: enumIsNormalMS rawFile: 16H146_5_120M.raw
13	gi|921086142	hypothetical protein [Marinovum algicola]	385	55216	44	24	7	3	6654	1	1	1	895.42	1788.83	2	1788.82	0.0013	0	97	4.1e-06	K	TAGQVSGAGDATVNEQER	Y					Elution from: 20.490 to 20.490 period: 0 experiment: 1 cycles: 1 precIntensity: 17693.0 FinneganScanNumber: 1255 MStype: enumIsNormalMS rawFile: 16H146_5_120M.raw
13	gi|921086142	hypothetical protein [Marinovum algicola]	385	55216	44	24	7	3	6655	1	1	1	895.42	1788.83	2	1788.82	0.0014	0	47.95	0.33	K	TAGQVSGAGDATVNEQER	Y					Elution from: 89.933 to 89.933 period: 0 experiment: 1 cycles: 1 precIntensity: 9723.0 FinneganScanNumber: 8244 MStype: enumIsNormalMS rawFile: 16H146_5_120M.raw
13	gi|921086142	hypothetical protein [Marinovum algicola]	385	55216	44	24	7	3	6656	1	1	1	895.42	1788.83	2	1788.82	0.0016	0	88.98	2.6e-05	K	TAGQVSGAGDATVNEQER	Y					Elution from: 22.512 to 22.512 period: 0 experiment: 1 cycles: 1 precIntensity: 20709.0 FinneganScanNumber: 1450 MStype: enumIsNormalMS rawFile: 16H146_5_120M.raw
13	gi|921086142	hypothetical protein [Marinovum algicola]	385	55216	44	24	7	3	6657	1	1	1	895.42	1788.83	2	1788.82	0.0018	0	36.76	4.1	K	TAGQVSGAGDATVNEQER	Y					Elution from: 55.095 to 55.095 period: 0 experiment: 1 cycles: 1 precIntensity: 30185.0 FinneganScanNumber: 4819 MStype: enumIsNormalMS rawFile: 16H146_5_120M.raw
13	gi|921086142	hypothetical protein [Marinovum algicola]	385	55216	44	24	7	3	6658	1	1	1	895.42	1788.83	2	1788.82	0.0018	0	79.6	0.00021	K	TAGQVSGAGDATVNEQER	Y					Elution from: 31.348 to 31.348 period: 0 experiment: 1 cycles: 1 precIntensity: 20515.0 FinneganScanNumber: 2322 MStype: enumIsNormalMS rawFile: 16H146_5_120M.raw
13	gi|921086142	hypothetical protein [Marinovum algicola]	385	55216	44	24	7	3	6659	1	1	1	895.42	1788.83	2	1788.82	0.0025	0	79.83	0.00023	K	TAGQVSGAGDATVNEQER	Y					Elution from: 20.417 to 20.417 period: 0 experiment: 1 cycles: 1 precIntensity: 27636.0 FinneganScanNumber: 1248 MStype: enumIsNormalMS rawFile: 16H146_5_120M.raw
13	gi|921086142	hypothetical protein [Marinovum algicola]	385	55216	44	24	7	3	6660	1	1	1	895.42	1788.83	2	1788.82	0.0025	0	64.05	0.0087	K	TAGQVSGAGDATVNEQER	Y					Elution from: 31.327 to 31.327 period: 0 experiment: 1 cycles: 1 precIntensity: 21611.0 FinneganScanNumber: 2320 MStype: enumIsNormalMS rawFile: 16H146_5_120M.raw
13	gi|921086142	hypothetical protein [Marinovum algicola]	385	55216	44	24	7	3	6661	1	1	1	895.42	1788.83	2	1788.82	0.0026	0	61.4	0.016	K	TAGQVSGAGDATVNEQER	Y					Elution from: 46.837 to 46.837 period: 0 experiment: 1 cycles: 1 precIntensity: 18179.0 FinneganScanNumber: 3938 MStype: enumIsNormalMS rawFile: 16H146_5_120M.raw
13	gi|921086142	hypothetical protein [Marinovum algicola]	385	55216	44	24	7	3	6662	1	1	1	895.421	1788.83	2	1788.82	0.0029	0	88.79	2.8e-05	K	TAGQVSGAGDATVNEQER	Y					Elution from: 22.575 to 22.575 period: 0 experiment: 1 cycles: 1 precIntensity: 26857.0 FinneganScanNumber: 1456 MStype: enumIsNormalMS rawFile: 16H146_5_120M.raw
13	gi|921086142	hypothetical protein [Marinovum algicola]	385	55216	44	24	7	3	6663	1	1	1	895.421	1788.83	2	1788.82	0.0031	0	57.1	0.041	K	TAGQVSGAGDATVNEQER	Y					Elution from: 44.495 to 44.495 period: 0 experiment: 1 cycles: 1 precIntensity: 20291.0 FinneganScanNumber: 3690 MStype: enumIsNormalMS rawFile: 16H146_5_120M.raw
13	gi|921086142	hypothetical protein [Marinovum algicola]	385	55216	44	24	7	3	6664	1	1	1	895.421	1788.83	2	1788.82	0.0034	0	73.04	0.0011	K	TAGQVSGAGDATVNEQER	Y					Elution from: 24.730 to 24.730 period: 0 experiment: 1 cycles: 1 precIntensity: 19915.0 FinneganScanNumber: 1664 MStype: enumIsNormalMS rawFile: 16H146_5_120M.raw
13	gi|921086142	hypothetical protein [Marinovum algicola]	385	55216	44	24	7	3	6665	1	1	1	895.421	1788.83	2	1788.82	0.0041	0	66.27	0.0053	K	TAGQVSGAGDATVNEQER	Y					Elution from: 35.857 to 35.857 period: 0 experiment: 1 cycles: 1 precIntensity: 24208.0 FinneganScanNumber: 2781 MStype: enumIsNormalMS rawFile: 16H146_5_120M.raw
13	gi|921086142	hypothetical protein [Marinovum algicola]	385	55216	44	24	7	3	6666	1	1	1	895.421	1788.83	2	1788.82	0.0042	0	58.17	0.034	K	TAGQVSGAGDATVNEQER	Y					Elution from: 33.530 to 33.530 period: 0 experiment: 1 cycles: 1 precIntensity: 32328.0 FinneganScanNumber: 2543 MStype: enumIsNormalMS rawFile: 16H146_5_120M.raw
13	gi|921086142	hypothetical protein [Marinovum algicola]	385	55216	44	24	7	3	6667	1	1	1	895.421	1788.83	2	1788.82	0.0042	0	68.6	0.0031	K	TAGQVSGAGDATVNEQER	Y					Elution from: 26.820 to 26.820 period: 0 experiment: 1 cycles: 1 precIntensity: 18497.0 FinneganScanNumber: 1869 MStype: enumIsNormalMS rawFile: 16H146_5_120M.raw
13	gi|921086142	hypothetical protein [Marinovum algicola]	385	55216	44	24	7	3	7499	1	1	1	714.363	2140.07	3	2140.07	-0.0005	0	27.39	71	R	SITSGGNDTFVKPLDYIGEK	T					Elution from: 80.928 to 80.928 period: 0 experiment: 1 cycles: 1 precIntensity: 42142.0 FinneganScanNumber: 7437 MStype: enumIsNormalMS rawFile: 16H146_5_120M.raw
13	gi|921086142	hypothetical protein [Marinovum algicola]	385	55216	44	24	7	3	7500	1	1	1	714.364	2140.07	3	2140.07	0.0004	0	24.94	120	R	SITSGGNDTFVKPLDYIGEK	T					Elution from: 80.990 to 80.990 period: 0 experiment: 1 cycles: 1 precIntensity: 57433.0 FinneganScanNumber: 7443 MStype: enumIsNormalMS rawFile: 16H146_5_120M.raw
13	gi|921086142	hypothetical protein [Marinovum algicola]	385	55216	44	24	7	3	7501	1	1	1	714.691	2141.05	3	2141.05	-0.0006	0	21.04	300	R	SITSGGNDTFVKPLDYIGEK	T	Deamidated (NQ)	0.00000010000000000000.0			Elution from: 83.573 to 83.573 period: 0 experiment: 1 cycles: 1 precIntensity: 14431.0 FinneganScanNumber: 7679 MStype: enumIsNormalMS rawFile: 16H146_5_120M.raw
14	gi|872571435	ABC transporter substrate-binding protein [Marinovum algicola]	365	38878	24	9	5	5	3404	1	1	1	600.269	1198.52	2	1198.53	-0.0021	0	37.24	2	K	WTSVSDDAYR	Q					Elution from: 39.443 to 39.443 period: 0 experiment: 1 cycles: 1 precIntensity: 42804.0 FinneganScanNumber: 3149 MStype: enumIsNormalMS rawFile: 16H146_5_120M.raw
14	gi|872571435	ABC transporter substrate-binding protein [Marinovum algicola]	365	38878	24	9	5	5	3405	1	1	1	600.269	1198.52	2	1198.53	-0.0016	0	41.46	0.59	K	WTSVSDDAYR	Q					Elution from: 37.363 to 37.363 period: 0 experiment: 1 cycles: 1 precIntensity: 65148.0 FinneganScanNumber: 2932 MStype: enumIsNormalMS rawFile: 16H146_5_120M.raw
14	gi|872571435	ABC transporter substrate-binding protein [Marinovum algicola]	365	38878	24	9	5	5	3406	1	1	1	600.269	1198.52	2	1198.53	-0.0016	0	26.42	19	K	WTSVSDDAYR	Q					Elution from: 39.395 to 39.395 period: 0 experiment: 1 cycles: 1 precIntensity: 47020.0 FinneganScanNumber: 3144 MStype: enumIsNormalMS rawFile: 16H146_5_120M.raw
14	gi|872571435	ABC transporter substrate-binding protein [Marinovum algicola]	365	38878	24	9	5	5	3407	1	1	1	600.27	1198.53	2	1198.53	-0.0003	0	21.77	54	K	WTSVSDDAYR	Q					Elution from: 37.332 to 37.332 period: 0 experiment: 1 cycles: 1 precIntensity: 47914.0 FinneganScanNumber: 2928 MStype: enumIsNormalMS rawFile: 16H146_5_120M.raw
14	gi|872571435	ABC transporter substrate-binding protein [Marinovum algicola]	365	38878	24	9	5	5	3408	1	1	1	600.27	1198.53	2	1198.53	0	0	57.73	0.014	K	WTSVSDDAYR	Q					Elution from: 33.207 to 33.207 period: 0 experiment: 1 cycles: 1 precIntensity: 72740.0 FinneganScanNumber: 2510 MStype: enumIsNormalMS rawFile: 16H146_5_120M.raw
14	gi|872571435	ABC transporter substrate-binding protein [Marinovum algicola]	365	38878	24	9	5	5	3409	1	1	1	600.27	1198.53	2	1198.53	0	0	47.06	0.16	K	WTSVSDDAYR	Q					Elution from: 35.272 to 35.272 period: 0 experiment: 1 cycles: 1 precIntensity: 132093.0 FinneganScanNumber: 2723 MStype: enumIsNormalMS rawFile: 16H146_5_120M.raw
14	gi|872571435	ABC transporter substrate-binding protein [Marinovum algicola]	365	38878	24	9	5	5	4370	3	1	1	658.836	1315.66	2	1315.66	-0.0051	0	23.35	160	K	EINSAEDLQGLK	F					Elution from: 54.445 to 54.445 period: 0 experiment: 1 cycles: 1 precIntensity: 20003.0 FinneganScanNumber: 4750 MStype: enumIsNormalMS rawFile: 16H146_5_120M.raw
14	gi|872571435	ABC transporter substrate-binding protein [Marinovum algicola]	365	38878	24	9	5	5	4371	1	1	1	658.837	1315.66	2	1315.66	-0.0021	0	42.3	1.7	K	EINSAEDLQGLK	F					Elution from: 49.153 to 49.153 period: 0 experiment: 1 cycles: 1 precIntensity: 76498.0 FinneganScanNumber: 4181 MStype: enumIsNormalMS rawFile: 16H146_5_120M.raw
14	gi|872571435	ABC transporter substrate-binding protein [Marinovum algicola]	365	38878	24	9	5	5	4372	1	1	1	658.838	1315.66	2	1315.66	-0.0013	0	50.56	0.28	K	EINSAEDLQGLK	F					Elution from: 42.878 to 42.878 period: 0 experiment: 1 cycles: 1 precIntensity: 24921.0 FinneganScanNumber: 3516 MStype: enumIsNormalMS rawFile: 16H146_5_120M.raw
14	gi|872571435	ABC transporter substrate-binding protein [Marinovum algicola]	365	38878	24	9	5	5	4373	1	1	1	658.838	1315.66	2	1315.66	0.0002	0	61.4	0.021	K	EINSAEDLQGLK	F					Elution from: 49.092 to 49.092 period: 0 experiment: 1 cycles: 1 precIntensity: 100946.0 FinneganScanNumber: 4174 MStype: enumIsNormalMS rawFile: 16H146_5_120M.raw
14	gi|872571435	ABC transporter substrate-binding protein [Marinovum algicola]	365	38878	24	9	5	5	4374	1	1	1	658.838	1315.66	2	1315.66	0.0002	0	54.12	0.11	K	EINSAEDLQGLK	F					Elution from: 45.005 to 45.005 period: 0 experiment: 1 cycles: 1 precIntensity: 196645.0 FinneganScanNumber: 3742 MStype: enumIsNormalMS rawFile: 16H146_5_120M.raw
14	gi|872571435	ABC transporter substrate-binding protein [Marinovum algicola]	365	38878	24	9	5	5	4375	3	1	1	658.838	1315.66	2	1315.66	0.0003	0	25.4	83	K	EINSAEDLQGLK	F					Elution from: 54.498 to 54.498 period: 0 experiment: 1 cycles: 1 precIntensity: 31220.0 FinneganScanNumber: 4756 MStype: enumIsNormalMS rawFile: 16H146_5_120M.raw
14	gi|872571435	ABC transporter substrate-binding protein [Marinovum algicola]	365	38878	24	9	5	5	4376	1	1	1	658.838	1315.66	2	1315.66	0.0005	0	68	0.0046	K	EINSAEDLQGLK	F					Elution from: 44.952 to 44.952 period: 0 experiment: 1 cycles: 1 precIntensity: 219225.0 FinneganScanNumber: 3736 MStype: enumIsNormalMS rawFile: 16H146_5_120M.raw
14	gi|872571435	ABC transporter substrate-binding protein [Marinovum algicola]	365	38878	24	9	5	5	4377	1	1	1	658.838	1315.66	2	1315.66	0.0006	0	57.9	0.047	K	EINSAEDLQGLK	F					Elution from: 42.925 to 42.925 period: 0 experiment: 1 cycles: 1 precIntensity: 78569.0 FinneganScanNumber: 3521 MStype: enumIsNormalMS rawFile: 16H146_5_120M.raw
14	gi|872571435	ABC transporter substrate-binding protein [Marinovum algicola]	365	38878	24	9	5	5	4378	1	1	1	658.839	1315.66	2	1315.66	0.0013	0	53.36	0.13	K	EINSAEDLQGLK	F					Elution from: 47.048 to 47.048 period: 0 experiment: 1 cycles: 1 precIntensity: 100003.0 FinneganScanNumber: 3959 MStype: enumIsNormalMS rawFile: 16H146_5_120M.raw
14	gi|872571435	ABC transporter substrate-binding protein [Marinovum algicola]	365	38878	24	9	5	5	4379	1	1	1	658.839	1315.66	2	1315.66	0.0014	0	45.7	0.75	K	EINSAEDLQGLK	F					Elution from: 47.093 to 47.093 period: 0 experiment: 1 cycles: 1 precIntensity: 101251.0 FinneganScanNumber: 3965 MStype: enumIsNormalMS rawFile: 16H146_5_120M.raw
14	gi|872571435	ABC transporter substrate-binding protein [Marinovum algicola]	365	38878	24	9	5	5	4777	1	1	1	682.819	1363.62	2	1363.63	-0.0012	0	43.94	0.82	R	DVFNELDAADQK	I					Elution from: 60.053 to 60.053 period: 0 experiment: 1 cycles: 1 precIntensity: 40240.0 FinneganScanNumber: 5349 MStype: enumIsNormalMS rawFile: 16H146_5_120M.raw
14	gi|872571435	ABC transporter substrate-binding protein [Marinovum algicola]	365	38878	24	9	5	5	4778	1	1	1	682.82	1363.62	2	1363.63	-0.0006	0	75.71	0.00051	R	DVFNELDAADQK	I					Elution from: 60.098 to 60.098 period: 0 experiment: 1 cycles: 1 precIntensity: 68816.0 FinneganScanNumber: 5354 MStype: enumIsNormalMS rawFile: 16H146_5_120M.raw
14	gi|872571435	ABC transporter substrate-binding protein [Marinovum algicola]	365	38878	24	9	5	5	6682	1	1	1	897.453	1792.89	2	1792.89	0.0024	0	80.41	0.00035	K	SFLAGNTGLQPGGWFNK	E					Elution from: 96.738 to 96.738 period: 0 experiment: 1 cycles: 1 precIntensity: 66043.0 FinneganScanNumber: 8835 MStype: enumIsNormalMS rawFile: 16H146_5_120M.raw
14	gi|872571435	ABC transporter substrate-binding protein [Marinovum algicola]	365	38878	24	9	5	5	7097	1	1	1	960.925	1919.83	2	1919.83	0.0028	0	82.83	4.9e-05	K	GSQEALDEHMGDELYAR	I					Elution from: 55.408 to 55.408 period: 0 experiment: 1 cycles: 1 precIntensity: 27198.0 FinneganScanNumber: 4856 MStype: enumIsNormalMS rawFile: 16H146_5_120M.raw
14	gi|872571435	ABC transporter substrate-binding protein [Marinovum algicola]	365	38878	24	9	5	5	7098	1	1	1	960.925	1919.84	2	1919.83	0.0037	0	72.25	0.00055	K	GSQEALDEHMGDELYAR	I					Elution from: 55.437 to 55.437 period: 0 experiment: 1 cycles: 1 precIntensity: 54649.0 FinneganScanNumber: 4859 MStype: enumIsNormalMS rawFile: 16H146_5_120M.raw
14	gi|872571435	ABC transporter substrate-binding protein [Marinovum algicola]	365	38878	24	9	5	5	7154	1	1	1	646.283	1935.83	3	1935.83	-0.0009	0	35.48	2.1	K	GSQEALDEHMGDELYAR	I	Oxidation (M)	0.00000000020000000.0			Elution from: 38.632 to 38.632 period: 0 experiment: 1 cycles: 1 precIntensity: 69741.0 FinneganScanNumber: 3065 MStype: enumIsNormalMS rawFile: 16H146_5_120M.raw
14	gi|872571435	ABC transporter substrate-binding protein [Marinovum algicola]	365	38878	24	9	5	5	7155	1	1	1	968.921	1935.83	2	1935.83	-0.0001	0	74.78	0.00023	K	GSQEALDEHMGDELYAR	I	Oxidation (M)	0.00000000020000000.0			Elution from: 38.087 to 38.087 period: 0 experiment: 1 cycles: 1 precIntensity: 45811.0 FinneganScanNumber: 3006 MStype: enumIsNormalMS rawFile: 16H146_5_120M.raw
14	gi|872571435	ABC transporter substrate-binding protein [Marinovum algicola]	365	38878	24	9	5	5	7156	1	1	1	968.921	1935.83	2	1935.83	0.0014	0	46.86	0.16	K	GSQEALDEHMGDELYAR	I	Oxidation (M)	0.00000000020000000.0			Elution from: 38.040 to 38.040 period: 0 experiment: 1 cycles: 1 precIntensity: 30413.0 FinneganScanNumber: 3001 MStype: enumIsNormalMS rawFile: 16H146_5_120M.raw
15	gi|306430553	light-harvesting protein, partial [Symbiodinium sp. C3]	353	26839	167	82	5	3	2096	1	1	1	479.75	957.486	2	957.488	-0.0021	0	38.27	2.6	K	LNAEIANGR	L	Deamidated (NQ)	0.000000100.0			Elution from: 79.618 to 79.618 period: 0 experiment: 1 cycles: 1 precIntensity: 17889.0 FinneganScanNumber: 7317 MStype: enumIsNormalMS rawFile: 16H146_5_120M.raw
15	gi|306430553	light-harvesting protein, partial [Symbiodinium sp. C3]	353	26839	167	82	5	3	2097	1	1	1	479.751	957.487	2	957.488	-0.0011	0	49.82	0.16	K	LNAEIANGR	L	Deamidated (NQ)	0.000000100.0			Elution from: 101.033 to 101.033 period: 0 experiment: 1 cycles: 1 precIntensity: 13049.0 FinneganScanNumber: 9206 MStype: enumIsNormalMS rawFile: 16H146_5_120M.raw
15	gi|306430553	light-harvesting protein, partial [Symbiodinium sp. C3]	353	26839	167	82	5	3	2098	7	1	1	479.751	957.487	2	957.488	-0.0008	0	36.85	3.1	K	LNAEIANGR	L	Deamidated (NQ)	0.000000100.0			Elution from: 42.822 to 42.822 period: 0 experiment: 1 cycles: 1 precIntensity: 55644.0 FinneganScanNumber: 3510 MStype: enumIsNormalMS rawFile: 16H146_5_120M.raw
15	gi|306430553	light-harvesting protein, partial [Symbiodinium sp. C3]	353	26839	167	82	5	3	2099	1	1	1	479.751	957.487	2	957.488	-0.0007	0	52.51	0.097	K	LNAEIANGR	L	Deamidated (NQ)	0.000000100.0			Elution from: 81.850 to 81.850 period: 0 experiment: 1 cycles: 1 precIntensity: 21252.0 FinneganScanNumber: 7522 MStype: enumIsNormalMS rawFile: 16H146_5_120M.raw
15	gi|306430553	light-harvesting protein, partial [Symbiodinium sp. C3]	353	26839	167	82	5	3	2100	1	1	1	479.751	957.487	2	957.488	-0.0007	0	44.97	0.6	K	LNAEIANGR	L	Deamidated (NQ)	0.000000100.0			Elution from: 96.597 to 96.597 period: 0 experiment: 1 cycles: 1 precIntensity: 17224.0 FinneganScanNumber: 8823 MStype: enumIsNormalMS rawFile: 16H146_5_120M.raw
15	gi|306430553	light-harvesting protein, partial [Symbiodinium sp. C3]	353	26839	167	82	5	3	2101	1	1	1	479.751	957.487	2	957.488	-0.0007	0	40.16	1.8	K	LNAEIANGR	L	Deamidated (NQ)	0.000000100.0			Elution from: 103.443 to 103.443 period: 0 experiment: 1 cycles: 1 precIntensity: 17397.0 FinneganScanNumber: 9414 MStype: enumIsNormalMS rawFile: 16H146_5_120M.raw
15	gi|306430553	light-harvesting protein, partial [Symbiodinium sp. C3]	353	26839	167	82	5	3	2102	1	1	1	479.751	957.487	2	957.488	-0.0007	0	42.68	1	K	LNAEIANGR	L	Deamidated (NQ)	0.000000100.0			Elution from: 103.183 to 103.183 period: 0 experiment: 1 cycles: 1 precIntensity: 16495.0 FinneganScanNumber: 9392 MStype: enumIsNormalMS rawFile: 16H146_5_120M.raw
15	gi|306430553	light-harvesting protein, partial [Symbiodinium sp. C3]	353	26839	167	82	5	3	2103	1	1	1	479.751	957.487	2	957.488	-0.0006	0	48.88	0.25	K	LNAEIANGR	L	Deamidated (NQ)	0.000000100.0			Elution from: 90.237 to 90.237 period: 0 experiment: 1 cycles: 1 precIntensity: 21303.0 FinneganScanNumber: 8270 MStype: enumIsNormalMS rawFile: 16H146_5_120M.raw
15	gi|306430553	light-harvesting protein, partial [Symbiodinium sp. C3]	353	26839	167	82	5	3	2104	2	1	1	479.751	957.487	2	957.488	-0.0006	0	43.63	0.83	K	LNAEIANGR	L	Deamidated (NQ)	0.000000100.0			Elution from: 75.370 to 75.370 period: 0 experiment: 1 cycles: 1 precIntensity: 20995.0 FinneganScanNumber: 6921 MStype: enumIsNormalMS rawFile: 16H146_5_120M.raw
15	gi|306430553	light-harvesting protein, partial [Symbiodinium sp. C3]	353	26839	167	82	5	3	2105	1	1	1	479.751	957.487	2	957.488	-0.0006	0	37.02	3.8	K	LNAEIANGR	L	Deamidated (NQ)	0.000000100.0			Elution from: 96.825 to 96.825 period: 0 experiment: 1 cycles: 1 precIntensity: 24424.0 FinneganScanNumber: 8843 MStype: enumIsNormalMS rawFile: 16H146_5_120M.raw
15	gi|306430553	light-harvesting protein, partial [Symbiodinium sp. C3]	353	26839	167	82	5	3	2106	2	1	1	479.751	957.487	2	957.488	-0.0006	0	34.71	6.5	K	LNAEIANGR	L	Deamidated (NQ)	0.000000100.0			Elution from: 45.012 to 45.012 period: 0 experiment: 1 cycles: 1 precIntensity: 88397.0 FinneganScanNumber: 3743 MStype: enumIsNormalMS rawFile: 16H146_5_120M.raw
15	gi|306430553	light-harvesting protein, partial [Symbiodinium sp. C3]	353	26839	167	82	5	3	2107	4	1	1	479.751	957.487	2	957.488	-0.0005	0	53.53	0.085	K	LNAEIANGR	L	Deamidated (NQ)	0.000000100.0			Elution from: 53.405 to 53.405 period: 0 experiment: 1 cycles: 1 precIntensity: 70598.0 FinneganScanNumber: 4633 MStype: enumIsNormalMS rawFile: 16H146_5_120M.raw
15	gi|306430553	light-harvesting protein, partial [Symbiodinium sp. C3]	353	26839	167	82	5	3	2108	1	1	1	479.751	957.487	2	957.488	-0.0005	0	47.12	0.37	K	LNAEIANGR	L	Deamidated (NQ)	0.000000100.0			Elution from: 85.968 to 85.968 period: 0 experiment: 1 cycles: 1 precIntensity: 29107.0 FinneganScanNumber: 7892 MStype: enumIsNormalMS rawFile: 16H146_5_120M.raw
15	gi|306430553	light-harvesting protein, partial [Symbiodinium sp. C3]	353	26839	167	82	5	3	2109	1	1	1	479.751	957.487	2	957.488	-0.0005	0	52.43	0.11	K	LNAEIANGR	L	Deamidated (NQ)	0.000000100.0			Elution from: 101.068 to 101.068 period: 0 experiment: 1 cycles: 1 precIntensity: 23279.0 FinneganScanNumber: 9209 MStype: enumIsNormalMS rawFile: 16H146_5_120M.raw
15	gi|306430553	light-harvesting protein, partial [Symbiodinium sp. C3]	353	26839	167	82	5	3	2110	10	1	1	479.751	957.487	2	957.488	-0.0005	0	23.62	83	K	LNAEIANGR	L	Deamidated (NQ)	0.000000100.0			Elution from: 44.958 to 44.958 period: 0 experiment: 1 cycles: 1 precIntensity: 92249.0 FinneganScanNumber: 3737 MStype: enumIsNormalMS rawFile: 16H146_5_120M.raw
15	gi|306430553	light-harvesting protein, partial [Symbiodinium sp. C3]	353	26839	167	82	5	3	2111	1	1	1	479.751	957.487	2	957.488	-0.0005	0	43.01	0.96	K	LNAEIANGR	L	Deamidated (NQ)	0.000000100.0			Elution from: 71.048 to 71.048 period: 0 experiment: 1 cycles: 1 precIntensity: 32690.0 FinneganScanNumber: 6498 MStype: enumIsNormalMS rawFile: 16H146_5_120M.raw
15	gi|306430553	light-harvesting protein, partial [Symbiodinium sp. C3]	353	26839	167	82	5	3	2112	1	1	1	479.751	957.487	2	957.488	-0.0005	0	40.29	1.8	K	LNAEIANGR	L	Deamidated (NQ)	0.000000100.0			Elution from: 83.888 to 83.888 period: 0 experiment: 1 cycles: 1 precIntensity: 27121.0 FinneganScanNumber: 7706 MStype: enumIsNormalMS rawFile: 16H146_5_120M.raw
15	gi|306430553	light-harvesting protein, partial [Symbiodinium sp. C3]	353	26839	167	82	5	3	2113	3	1	1	479.751	957.487	2	957.488	-0.0004	0	35.28	5.7	K	LNAEIANGR	L	Deamidated (NQ)	0.000000100.0			Elution from: 42.917 to 42.917 period: 0 experiment: 1 cycles: 1 precIntensity: 84446.0 FinneganScanNumber: 3520 MStype: enumIsNormalMS rawFile: 16H146_5_120M.raw
15	gi|306430553	light-harvesting protein, partial [Symbiodinium sp. C3]	353	26839	167	82	5	3	2114	1	1	1	479.751	957.487	2	957.488	-0.0004	0	46.11	0.47	K	LNAEIANGR	L	Deamidated (NQ)	0.000000100.0			Elution from: 66.438 to 66.438 period: 0 experiment: 1 cycles: 1 precIntensity: 35983.0 FinneganScanNumber: 6025 MStype: enumIsNormalMS rawFile: 16H146_5_120M.raw
15	gi|306430553	light-harvesting protein, partial [Symbiodinium sp. C3]	353	26839	167	82	5	3	2115	1	1	1	479.751	957.488	2	957.488	-0.0003	0	55.77	0.051	K	LNAEIANGR	L	Deamidated (NQ)	0.000000100.0			Elution from: 36.445 to 36.445 period: 0 experiment: 1 cycles: 1 precIntensity: 130363.0 FinneganScanNumber: 2838 MStype: enumIsNormalMS rawFile: 16H146_5_120M.raw
15	gi|306430553	light-harvesting protein, partial [Symbiodinium sp. C3]	353	26839	167	82	5	3	2116	2	1	1	479.751	957.488	2	957.488	-0.0003	0	35.12	5.9	K	LNAEIANGR	L	Deamidated (NQ)	0.000000100.0			Elution from: 83.983 to 83.983 period: 0 experiment: 1 cycles: 1 precIntensity: 18225.0 FinneganScanNumber: 7714 MStype: enumIsNormalMS rawFile: 16H146_5_120M.raw
15	gi|306430553	light-harvesting protein, partial [Symbiodinium sp. C3]	353	26839	167	82	5	3	2117	1	1	1	479.751	957.488	2	957.488	-0.0003	0	56.54	0.042	K	LNAEIANGR	L	Deamidated (NQ)	0.000000100.0			Elution from: 86.072 to 86.072 period: 0 experiment: 1 cycles: 1 precIntensity: 25496.0 FinneganScanNumber: 7901 MStype: enumIsNormalMS rawFile: 16H146_5_120M.raw
15	gi|306430553	light-harvesting protein, partial [Symbiodinium sp. C3]	353	26839	167	82	5	3	2118	3	1	1	479.751	957.488	2	957.488	-0.0002	0	34.69	6.5	K	LNAEIANGR	L	Deamidated (NQ)	0.000000100.0			Elution from: 90.308 to 90.308 period: 0 experiment: 1 cycles: 1 precIntensity: 16986.0 FinneganScanNumber: 8276 MStype: enumIsNormalMS rawFile: 16H146_5_120M.raw
15	gi|306430553	light-harvesting protein, partial [Symbiodinium sp. C3]	353	26839	167	82	5	3	2119	1	1	1	479.751	957.488	2	957.488	-0.0002	0	54.03	0.076	K	LNAEIANGR	L	Deamidated (NQ)	0.000000100.0			Elution from: 38.523 to 38.523 period: 0 experiment: 1 cycles: 1 precIntensity: 102732.0 FinneganScanNumber: 3053 MStype: enumIsNormalMS rawFile: 16H146_5_120M.raw
15	gi|306430553	light-harvesting protein, partial [Symbiodinium sp. C3]	353	26839	167	82	5	3	2120	1	1	1	479.751	957.488	2	957.488	-0.0002	0	69.63	0.0021	K	LNAEIANGR	L	Deamidated (NQ)	0.000000100.0			Elution from: 77.397 to 77.397 period: 0 experiment: 1 cycles: 1 precIntensity: 27049.0 FinneganScanNumber: 7115 MStype: enumIsNormalMS rawFile: 16H146_5_120M.raw
15	gi|306430553	light-harvesting protein, partial [Symbiodinium sp. C3]	353	26839	167	82	5	3	2121	1	1	1	479.751	957.488	2	957.488	-0.0002	0	47.31	0.36	K	LNAEIANGR	L	Deamidated (NQ)	0.000000100.0			Elution from: 77.495 to 77.495 period: 0 experiment: 1 cycles: 1 precIntensity: 27636.0 FinneganScanNumber: 7124 MStype: enumIsNormalMS rawFile: 16H146_5_120M.raw
15	gi|306430553	light-harvesting protein, partial [Symbiodinium sp. C3]	353	26839	167	82	5	3	2122	2	1	1	479.751	957.488	2	957.488	-0.0002	0	39	2.4	K	LNAEIANGR	L	Deamidated (NQ)	0.000000100.0			Elution from: 94.457 to 94.457 period: 0 experiment: 1 cycles: 1 precIntensity: 19369.0 FinneganScanNumber: 8638 MStype: enumIsNormalMS rawFile: 16H146_5_120M.raw
15	gi|306430553	light-harvesting protein, partial [Symbiodinium sp. C3]	353	26839	167	82	5	3	2123	1	1	1	479.751	957.488	2	957.488	-0.0002	0	42.32	1.1	K	LNAEIANGR	L	Deamidated (NQ)	0.000000100.0			Elution from: 92.362 to 92.362 period: 0 experiment: 1 cycles: 1 precIntensity: 11710.0 FinneganScanNumber: 8455 MStype: enumIsNormalMS rawFile: 16H146_5_120M.raw
15	gi|306430553	light-harvesting protein, partial [Symbiodinium sp. C3]	353	26839	167	82	5	3	2124	1	1	1	479.751	957.488	2	957.488	-0.0001	0	53.92	0.077	K	LNAEIANGR	L	Deamidated (NQ)	0.000000100.0			Elution from: 94.540 to 94.540 period: 0 experiment: 1 cycles: 1 precIntensity: 15999.0 FinneganScanNumber: 8645 MStype: enumIsNormalMS rawFile: 16H146_5_120M.raw
15	gi|306430553	light-harvesting protein, partial [Symbiodinium sp. C3]	353	26839	167	82	5	3	2125	1	1	1	479.751	957.488	2	957.488	-0.0001	0	56.24	0.045	K	LNAEIANGR	L	Deamidated (NQ)	0.000000100.0			Elution from: 98.878 to 98.878 period: 0 experiment: 1 cycles: 1 precIntensity: 17941.0 FinneganScanNumber: 9021 MStype: enumIsNormalMS rawFile: 16H146_5_120M.raw
15	gi|306430553	light-harvesting protein, partial [Symbiodinium sp. C3]	353	26839	167	82	5	3	2126	1	1	1	479.751	957.488	2	957.488	-0.0001	0	58.14	0.029	K	LNAEIANGR	L	Deamidated (NQ)	0.000000100.0			Elution from: 45.193 to 45.193 period: 0 experiment: 1 cycles: 1 precIntensity: 68002.0 FinneganScanNumber: 3762 MStype: enumIsNormalMS rawFile: 16H146_5_120M.raw
15	gi|306430553	light-harvesting protein, partial [Symbiodinium sp. C3]	353	26839	167	82	5	3	2127	1	1	1	479.751	957.488	2	957.488	-0.0001	0	66.65	0.0042	K	LNAEIANGR	L	Deamidated (NQ)	0.000000100.0			Elution from: 34.430 to 34.430 period: 0 experiment: 1 cycles: 1 precIntensity: 132579.0 FinneganScanNumber: 2634 MStype: enumIsNormalMS rawFile: 16H146_5_120M.raw
15	gi|306430553	light-harvesting protein, partial [Symbiodinium sp. C3]	353	26839	167	82	5	3	2128	3	1	1	479.751	957.488	2	957.488	0	0	41.22	1.5	K	LNAEIANGR	L	Deamidated (NQ)	0.000000100.0			Elution from: 55.590 to 55.590 period: 0 experiment: 1 cycles: 1 precIntensity: 51285.0 FinneganScanNumber: 4877 MStype: enumIsNormalMS rawFile: 16H146_5_120M.raw
15	gi|306430553	light-harvesting protein, partial [Symbiodinium sp. C3]	353	26839	167	82	5	3	2129	1	1	1	479.751	957.488	2	957.488	0	0	67.99	0.0031	K	LNAEIANGR	L	Deamidated (NQ)	0.000000100.0			Elution from: 27.957 to 27.957 period: 0 experiment: 1 cycles: 1 precIntensity: 458589.0 FinneganScanNumber: 1981 MStype: enumIsNormalMS rawFile: 16H146_5_120M.raw
15	gi|306430553	light-harvesting protein, partial [Symbiodinium sp. C3]	353	26839	167	82	5	3	2130	1	1	1	479.751	957.488	2	957.488	0	0	66.82	0.0041	K	LNAEIANGR	L	Deamidated (NQ)	0.000000100.0			Elution from: 98.973 to 98.973 period: 0 experiment: 1 cycles: 1 precIntensity: 14848.0 FinneganScanNumber: 9029 MStype: enumIsNormalMS rawFile: 16H146_5_120M.raw
15	gi|306430553	light-harvesting protein, partial [Symbiodinium sp. C3]	353	26839	167	82	5	3	2131	1	1	1	479.751	957.488	2	957.488	0	0	55.22	0.059	K	LNAEIANGR	L	Deamidated (NQ)	0.000000100.0			Elution from: 92.417 to 92.417 period: 0 experiment: 1 cycles: 1 precIntensity: 15231.0 FinneganScanNumber: 8460 MStype: enumIsNormalMS rawFile: 16H146_5_120M.raw
15	gi|306430553	light-harvesting protein, partial [Symbiodinium sp. C3]	353	26839	167	82	5	3	2132	1	1	1	479.751	957.488	2	957.488	0.0001	0	55.68	0.053	K	LNAEIANGR	L	Deamidated (NQ)	0.000000100.0			Elution from: 38.590 to 38.590 period: 0 experiment: 1 cycles: 1 precIntensity: 101507.0 FinneganScanNumber: 3060 MStype: enumIsNormalMS rawFile: 16H146_5_120M.raw
15	gi|306430553	light-harvesting protein, partial [Symbiodinium sp. C3]	353	26839	167	82	5	3	2133	1	1	1	479.751	957.488	2	957.488	0.0001	0	45.48	0.55	K	LNAEIANGR	L	Deamidated (NQ)	0.000000100.0			Elution from: 57.812 to 57.812 period: 0 experiment: 1 cycles: 1 precIntensity: 43201.0 FinneganScanNumber: 5106 MStype: enumIsNormalMS rawFile: 16H146_5_120M.raw
15	gi|306430553	light-harvesting protein, partial [Symbiodinium sp. C3]	353	26839	167	82	5	3	2134	1	1	1	479.751	957.488	2	957.488	0.0001	0	60.1	0.019	K	LNAEIANGR	L	Deamidated (NQ)	0.000000100.0			Elution from: 73.133 to 73.133 period: 0 experiment: 1 cycles: 1 precIntensity: 28800.0 FinneganScanNumber: 6703 MStype: enumIsNormalMS rawFile: 16H146_5_120M.raw
15	gi|306430553	light-harvesting protein, partial [Symbiodinium sp. C3]	353	26839	167	82	5	3	2135	1	1	1	479.751	957.488	2	957.488	0.0001	0	64.71	0.0066	K	LNAEIANGR	L	Deamidated (NQ)	0.000000100.0			Elution from: 25.903 to 25.903 period: 0 experiment: 1 cycles: 1 precIntensity: 726623.0 FinneganScanNumber: 1780 MStype: enumIsNormalMS rawFile: 16H146_5_120M.raw
15	gi|306430553	light-harvesting protein, partial [Symbiodinium sp. C3]	353	26839	167	82	5	3	2136	1	1	1	479.751	957.488	2	957.488	0.0001	0	72.37	0.0011	K	LNAEIANGR	L	Deamidated (NQ)	0.000000100.0			Elution from: 23.725 to 23.725 period: 0 experiment: 1 cycles: 1 precIntensity: 1429362.0 FinneganScanNumber: 1567 MStype: enumIsNormalMS rawFile: 16H146_5_120M.raw
15	gi|306430553	light-harvesting protein, partial [Symbiodinium sp. C3]	353	26839	167	82	5	3	2137	1	1	1	479.751	957.488	2	957.488	0.0001	0	56.04	0.049	K	LNAEIANGR	L	Deamidated (NQ)	0.000000100.0			Elution from: 60.217 to 60.217 period: 0 experiment: 1 cycles: 1 precIntensity: 49067.0 FinneganScanNumber: 5367 MStype: enumIsNormalMS rawFile: 16H146_5_120M.raw
15	gi|306430553	light-harvesting protein, partial [Symbiodinium sp. C3]	353	26839	167	82	5	3	2138	1	1	1	479.751	957.488	2	957.488	0.0002	0	46.96	0.39	K	LNAEIANGR	L	Deamidated (NQ)	0.000000100.0			Elution from: 64.417 to 64.417 period: 0 experiment: 1 cycles: 1 precIntensity: 63028.0 FinneganScanNumber: 5819 MStype: enumIsNormalMS rawFile: 16H146_5_120M.raw
15	gi|306430553	light-harvesting protein, partial [Symbiodinium sp. C3]	353	26839	167	82	5	3	2139	2	1	1	479.751	957.488	2	957.488	0.0002	0	39.86	2	K	LNAEIANGR	L	Deamidated (NQ)	0.000000100.0			Elution from: 49.223 to 49.223 period: 0 experiment: 1 cycles: 1 precIntensity: 47800.0 FinneganScanNumber: 4189 MStype: enumIsNormalMS rawFile: 16H146_5_120M.raw
15	gi|306430553	light-harvesting protein, partial [Symbiodinium sp. C3]	353	26839	167	82	5	3	2140	2	1	1	479.751	957.488	2	957.488	0.0002	0	58.19	0.03	K	LNAEIANGR	L	Deamidated (NQ)	0.000000100.0			Elution from: 36.498 to 36.498 period: 0 experiment: 1 cycles: 1 precIntensity: 148732.0 FinneganScanNumber: 2843 MStype: enumIsNormalMS rawFile: 16H146_5_120M.raw
15	gi|306430553	light-harvesting protein, partial [Symbiodinium sp. C3]	353	26839	167	82	5	3	2141	1	1	1	479.751	957.488	2	957.488	0.0002	0	36.92	4	K	LNAEIANGR	L	Deamidated (NQ)	0.000000100.0			Elution from: 62.235 to 62.235 period: 0 experiment: 1 cycles: 1 precIntensity: 64016.0 FinneganScanNumber: 5590 MStype: enumIsNormalMS rawFile: 16H146_5_120M.raw
15	gi|306430553	light-harvesting protein, partial [Symbiodinium sp. C3]	353	26839	167	82	5	3	2142	1	1	1	479.751	957.488	2	957.488	0.0002	0	60.88	0.016	K	LNAEIANGR	L	Deamidated (NQ)	0.000000100.0			Elution from: 32.178 to 32.178 period: 0 experiment: 1 cycles: 1 precIntensity: 158799.0 FinneganScanNumber: 2405 MStype: enumIsNormalMS rawFile: 16H146_5_120M.raw
15	gi|306430553	light-harvesting protein, partial [Symbiodinium sp. C3]	353	26839	167	82	5	3	2143	1	1	1	479.751	957.488	2	957.488	0.0002	0	64.68	0.0067	K	LNAEIANGR	L	Deamidated (NQ)	0.000000100.0			Elution from: 28.012 to 28.012 period: 0 experiment: 1 cycles: 1 precIntensity: 505402.0 FinneganScanNumber: 1987 MStype: enumIsNormalMS rawFile: 16H146_5_120M.raw
15	gi|306430553	light-harvesting protein, partial [Symbiodinium sp. C3]	353	26839	167	82	5	3	2144	1	1	1	479.751	957.488	2	957.488	0.0003	0	52.51	0.11	K	LNAEIANGR	L	Deamidated (NQ)	0.000000100.0			Elution from: 25.847 to 25.847 period: 0 experiment: 1 cycles: 1 precIntensity: 745079.0 FinneganScanNumber: 1774 MStype: enumIsNormalMS rawFile: 16H146_5_120M.raw
15	gi|306430553	light-harvesting protein, partial [Symbiodinium sp. C3]	353	26839	167	82	5	3	2145	9	1	1	479.751	957.488	2	957.488	0.0003	0	26.96	39	K	LNAEIANGR	L	Deamidated (NQ)	0.000000100.0			Elution from: 68.953 to 68.953 period: 0 experiment: 1 cycles: 1 precIntensity: 31147.0 FinneganScanNumber: 6286 MStype: enumIsNormalMS rawFile: 16H146_5_120M.raw
15	gi|306430553	light-harvesting protein, partial [Symbiodinium sp. C3]	353	26839	167	82	5	3	2146	1	1	1	479.751	957.488	2	957.488	0.0003	0	49.75	0.21	K	LNAEIANGR	L	Deamidated (NQ)	0.000000100.0			Elution from: 47.063 to 47.063 period: 0 experiment: 1 cycles: 1 precIntensity: 77432.0 FinneganScanNumber: 3961 MStype: enumIsNormalMS rawFile: 16H146_5_120M.raw
15	gi|306430553	light-harvesting protein, partial [Symbiodinium sp. C3]	353	26839	167	82	5	3	2147	1	1	1	479.751	957.488	2	957.488	0.0003	0	49.58	0.22	K	LNAEIANGR	L	Deamidated (NQ)	0.000000100.0			Elution from: 47.102 to 47.102 period: 0 experiment: 1 cycles: 1 precIntensity: 59090.0 FinneganScanNumber: 3966 MStype: enumIsNormalMS rawFile: 16H146_5_120M.raw
15	gi|306430553	light-harvesting protein, partial [Symbiodinium sp. C3]	353	26839	167	82	5	3	2148	1	1	1	479.751	957.488	2	957.488	0.0004	0	50.54	0.17	K	LNAEIANGR	L	Deamidated (NQ)	0.000000100.0			Elution from: 49.165 to 49.165 period: 0 experiment: 1 cycles: 1 precIntensity: 47557.0 FinneganScanNumber: 4182 MStype: enumIsNormalMS rawFile: 16H146_5_120M.raw
15	gi|306430553	light-harvesting protein, partial [Symbiodinium sp. C3]	353	26839	167	82	5	3	2149	1	1	1	479.752	957.488	2	957.488	0.0005	0	60.41	0.018	K	LNAEIANGR	L	Deamidated (NQ)	0.000000100.0			Elution from: 64.330 to 64.330 period: 0 experiment: 1 cycles: 1 precIntensity: 53917.0 FinneganScanNumber: 5809 MStype: enumIsNormalMS rawFile: 16H146_5_120M.raw
15	gi|306430553	light-harvesting protein, partial [Symbiodinium sp. C3]	353	26839	167	82	5	3	2150	1	1	1	479.752	957.488	2	957.488	0.0005	0	68.1	0.003	K	LNAEIANGR	L	Deamidated (NQ)	0.000000100.0			Elution from: 23.783 to 23.783 period: 0 experiment: 1 cycles: 1 precIntensity: 1261684.0 FinneganScanNumber: 1573 MStype: enumIsNormalMS rawFile: 16H146_5_120M.raw
15	gi|306430553	light-harvesting protein, partial [Symbiodinium sp. C3]	353	26839	167	82	5	3	2151	1	1	1	479.752	957.488	2	957.488	0.0005	0	52.08	0.12	K	LNAEIANGR	L	Deamidated (NQ)	0.000000100.0			Elution from: 32.325 to 32.325 period: 0 experiment: 1 cycles: 1 precIntensity: 188330.0 FinneganScanNumber: 2421 MStype: enumIsNormalMS rawFile: 16H146_5_120M.raw
15	gi|306430553	light-harvesting protein, partial [Symbiodinium sp. C3]	353	26839	167	82	5	3	2152	2	1	1	479.752	957.488	2	957.488	0.0005	0	39.54	2.2	K	LNAEIANGR	L	Deamidated (NQ)	0.000000100.0			Elution from: 62.290 to 62.290 period: 0 experiment: 1 cycles: 1 precIntensity: 48313.0 FinneganScanNumber: 5596 MStype: enumIsNormalMS rawFile: 16H146_5_120M.raw
15	gi|306430553	light-harvesting protein, partial [Symbiodinium sp. C3]	353	26839	167	82	5	3	2153	1	1	1	479.752	957.488	2	957.488	0.0005	0	42.45	1.1	K	LNAEIANGR	L	Deamidated (NQ)	0.000000100.0			Elution from: 66.930 to 66.930 period: 0 experiment: 1 cycles: 1 precIntensity: 41495.0 FinneganScanNumber: 6079 MStype: enumIsNormalMS rawFile: 16H146_5_120M.raw
15	gi|306430553	light-harvesting protein, partial [Symbiodinium sp. C3]	353	26839	167	82	5	3	2154	1	1	1	479.752	957.488	2	957.488	0.0005	0	61.37	0.014	K	LNAEIANGR	L	Deamidated (NQ)	0.000000100.0			Elution from: 30.073 to 30.073 period: 0 experiment: 1 cycles: 1 precIntensity: 260830.0 FinneganScanNumber: 2192 MStype: enumIsNormalMS rawFile: 16H146_5_120M.raw
15	gi|306430553	light-harvesting protein, partial [Symbiodinium sp. C3]	353	26839	167	82	5	3	2155	2	1	1	479.752	957.489	2	957.488	0.0005	0	29.89	20	K	LNAEIANGR	L	Deamidated (NQ)	0.000000100.0			Elution from: 40.715 to 40.715 period: 0 experiment: 1 cycles: 1 precIntensity: 98721.0 FinneganScanNumber: 3280 MStype: enumIsNormalMS rawFile: 16H146_5_120M.raw
15	gi|306430553	light-harvesting protein, partial [Symbiodinium sp. C3]	353	26839	167	82	5	3	2156	1	1	1	479.752	957.489	2	957.488	0.0006	0	68.27	0.0029	K	LNAEIANGR	L	Deamidated (NQ)	0.000000100.0			Elution from: 21.632 to 21.632 period: 0 experiment: 1 cycles: 1 precIntensity: 4649087.0 FinneganScanNumber: 1366 MStype: enumIsNormalMS rawFile: 16H146_5_120M.raw
15	gi|306430553	light-harvesting protein, partial [Symbiodinium sp. C3]	353	26839	167	82	5	3	2157	1	1	1	479.752	957.489	2	957.488	0.0006	0	69.81	0.002	K	LNAEIANGR	L	Deamidated (NQ)	0.000000100.0			Elution from: 73.193 to 73.193 period: 0 experiment: 1 cycles: 1 precIntensity: 47357.0 FinneganScanNumber: 6709 MStype: enumIsNormalMS rawFile: 16H146_5_120M.raw
15	gi|306430553	light-harvesting protein, partial [Symbiodinium sp. C3]	353	26839	167	82	5	3	2158	2	1	1	479.752	957.489	2	957.488	0.0007	0	40.72	1.7	K	LNAEIANGR	L	Deamidated (NQ)	0.000000100.0			Elution from: 34.373 to 34.373 period: 0 experiment: 1 cycles: 1 precIntensity: 126166.0 FinneganScanNumber: 2628 MStype: enumIsNormalMS rawFile: 16H146_5_120M.raw
15	gi|306430553	light-harvesting protein, partial [Symbiodinium sp. C3]	353	26839	167	82	5	3	2159	6	1	1	479.752	957.489	2	957.488	0.0007	0	29.19	24	K	LNAEIANGR	L	Deamidated (NQ)	0.000000100.0			Elution from: 51.262 to 51.262 period: 0 experiment: 1 cycles: 1 precIntensity: 65191.0 FinneganScanNumber: 4404 MStype: enumIsNormalMS rawFile: 16H146_5_120M.raw
15	gi|306430553	light-harvesting protein, partial [Symbiodinium sp. C3]	353	26839	167	82	5	3	2160	1	1	1	479.752	957.489	2	957.488	0.0007	0	55.49	0.056	K	LNAEIANGR	L	Deamidated (NQ)	0.000000100.0			Elution from: 60.175 to 60.175 period: 0 experiment: 1 cycles: 1 precIntensity: 56014.0 FinneganScanNumber: 5362 MStype: enumIsNormalMS rawFile: 16H146_5_120M.raw
15	gi|306430553	light-harvesting protein, partial [Symbiodinium sp. C3]	353	26839	167	82	5	3	2161	1	1	1	479.752	957.489	2	957.488	0.0008	0	68.22	0.003	K	LNAEIANGR	L	Deamidated (NQ)	0.000000100.0			Elution from: 21.683 to 21.683 period: 0 experiment: 1 cycles: 1 precIntensity: 3926334.0 FinneganScanNumber: 1372 MStype: enumIsNormalMS rawFile: 16H146_5_120M.raw
15	gi|306430553	light-harvesting protein, partial [Symbiodinium sp. C3]	353	26839	167	82	5	3	2162	2	1	1	479.752	957.489	2	957.488	0.0008	0	40.81	1.6	K	LNAEIANGR	L	Deamidated (NQ)	0.000000100.0			Elution from: 88.255 to 88.255 period: 0 experiment: 1 cycles: 1 precIntensity: 10305.0 FinneganScanNumber: 8094 MStype: enumIsNormalMS rawFile: 16H146_5_120M.raw
15	gi|306430553	light-harvesting protein, partial [Symbiodinium sp. C3]	353	26839	167	82	5	3	2163	2	1	1	479.752	957.489	2	957.488	0.0008	0	34.47	7	K	LNAEIANGR	L	Deamidated (NQ)	0.000000100.0			Elution from: 40.668 to 40.668 period: 0 experiment: 1 cycles: 1 precIntensity: 110285.0 FinneganScanNumber: 3274 MStype: enumIsNormalMS rawFile: 16H146_5_120M.raw
15	gi|306430553	light-harvesting protein, partial [Symbiodinium sp. C3]	353	26839	167	82	5	3	2164	1	1	1	479.753	957.491	2	957.488	0.0029	0	68.07	0.0042	K	LNAEIANGR	L	Deamidated (NQ)	0.000000100.0			Elution from: 19.570 to 19.570 period: 0 experiment: 1 cycles: 1 precIntensity: 7412290.0 FinneganScanNumber: 1168 MStype: enumIsNormalMS rawFile: 16H146_5_120M.raw
15	gi|306430553	light-harvesting protein, partial [Symbiodinium sp. C3]	353	26839	167	82	5	3	2165	1	1	1	479.753	957.491	2	957.488	0.0036	0	62.28	0.016	K	LNAEIANGR	L	Deamidated (NQ)	0.000000100.0			Elution from: 19.605 to 19.605 period: 0 experiment: 1 cycles: 1 precIntensity: 6682125.0 FinneganScanNumber: 1172 MStype: enumIsNormalMS rawFile: 16H146_5_120M.raw
15	gi|306430553	light-harvesting protein, partial [Symbiodinium sp. C3]	353	26839	167	82	5	3	2169	1	1	1	480.243	958.472	2	958.472	-0.0002	0	57.59	0.038	K	LNAEIANGR	L	2 Deamidated (NQ)	0.010000100.0			Elution from: 17.513 to 17.513 period: 0 experiment: 1 cycles: 1 precIntensity: 369429.0 FinneganScanNumber: 971 MStype: enumIsNormalMS rawFile: 16H146_5_120M.raw
15	gi|306430553	light-harvesting protein, partial [Symbiodinium sp. C3]	353	26839	167	82	5	3	2170	2	1	1	480.243	958.472	2	958.472	0.0006	0	54.23	0.087	K	LNAEIANGR	L	2 Deamidated (NQ)	0.010000100.0			Elution from: 17.455 to 17.455 period: 0 experiment: 1 cycles: 1 precIntensity: 359815.0 FinneganScanNumber: 965 MStype: enumIsNormalMS rawFile: 16H146_5_120M.raw
15	gi|306430553	light-harvesting protein, partial [Symbiodinium sp. C3]	353	26839	167	82	5	3	2733	2	1	1	543.798	1085.58	2	1085.58	-0.0007	1	34.57	9.9	K	KLNAEIANGR	L	Deamidated (NQ)	0.0000000100.0			Elution from: 17.293 to 17.293 period: 0 experiment: 1 cycles: 1 precIntensity: 39240.0 FinneganScanNumber: 950 MStype: enumIsNormalMS rawFile: 16H146_5_120M.raw
15	gi|306430553	light-harvesting protein, partial [Symbiodinium sp. C3]	353	26839	167	82	5	3	2734	2	1	1	543.798	1085.58	2	1085.58	-0.0007	1	24.91	91	K	KLNAEIANGR	L	Deamidated (NQ)	0.0000000100.0			Elution from: 45.515 to 45.515 period: 0 experiment: 1 cycles: 1 precIntensity: 42299.0 FinneganScanNumber: 3793 MStype: enumIsNormalMS rawFile: 16H146_5_120M.raw
15	gi|306430553	light-harvesting protein, partial [Symbiodinium sp. C3]	353	26839	167	82	5	3	2735	1	1	1	543.798	1085.58	2	1085.58	-0.0007	1	56.98	0.057	K	KLNAEIANGR	L	Deamidated (NQ)	0.0000000100.0			Elution from: 47.765 to 47.765 period: 0 experiment: 1 cycles: 1 precIntensity: 31554.0 FinneganScanNumber: 4033 MStype: enumIsNormalMS rawFile: 16H146_5_120M.raw
15	gi|306430553	light-harvesting protein, partial [Symbiodinium sp. C3]	353	26839	167	82	5	3	2737	1	1	1	543.798	1085.58	2	1085.58	-0.0006	1	56.86	0.059	K	KLNAEIANGR	L	Deamidated (NQ)	0.0000000100.0			Elution from: 19.453 to 19.453 period: 0 experiment: 1 cycles: 1 precIntensity: 69833.0 FinneganScanNumber: 1157 MStype: enumIsNormalMS rawFile: 16H146_5_120M.raw
15	gi|306430553	light-harvesting protein, partial [Symbiodinium sp. C3]	353	26839	167	82	5	3	2739	1	1	1	543.798	1085.58	2	1085.58	-0.0005	1	34.97	9.1	K	KLNAEIANGR	L	Deamidated (NQ)	0.0000000100.0			Elution from: 34.280 to 34.280 period: 0 experiment: 1 cycles: 1 precIntensity: 45049.0 FinneganScanNumber: 2619 MStype: enumIsNormalMS rawFile: 16H146_5_120M.raw
15	gi|306430553	light-harvesting protein, partial [Symbiodinium sp. C3]	353	26839	167	82	5	3	2740	3	1	1	543.798	1085.58	2	1085.58	-0.0005	1	33.39	13	K	KLNAEIANGR	L	Deamidated (NQ)	0.0000000100.0			Elution from: 36.780 to 36.780 period: 0 experiment: 1 cycles: 1 precIntensity: 44056.0 FinneganScanNumber: 2872 MStype: enumIsNormalMS rawFile: 16H146_5_120M.raw
15	gi|306430553	light-harvesting protein, partial [Symbiodinium sp. C3]	353	26839	167	82	5	3	2744	1	1	1	543.798	1085.58	2	1085.58	-0.0004	1	45.82	0.73	K	KLNAEIANGR	L	Deamidated (NQ)	0.0000000100.0			Elution from: 34.758 to 34.758 period: 0 experiment: 1 cycles: 1 precIntensity: 35197.0 FinneganScanNumber: 2669 MStype: enumIsNormalMS rawFile: 16H146_5_120M.raw
15	gi|306430553	light-harvesting protein, partial [Symbiodinium sp. C3]	353	26839	167	82	5	3	2745	1	1	1	543.799	1085.58	2	1085.58	-0.0003	1	42.28	1.7	K	KLNAEIANGR	L	Deamidated (NQ)	0.0000000100.0			Elution from: 41.367 to 41.367 period: 0 experiment: 1 cycles: 1 precIntensity: 19880.0 FinneganScanNumber: 3350 MStype: enumIsNormalMS rawFile: 16H146_5_120M.raw
15	gi|306430553	light-harvesting protein, partial [Symbiodinium sp. C3]	353	26839	167	82	5	3	2746	1	1	1	543.799	1085.58	2	1085.58	-0.0003	1	47.18	0.54	K	KLNAEIANGR	L	Deamidated (NQ)	0.0000000100.0			Elution from: 37.070 to 37.070 period: 0 experiment: 1 cycles: 1 precIntensity: 52141.0 FinneganScanNumber: 2900 MStype: enumIsNormalMS rawFile: 16H146_5_120M.raw
15	gi|306430553	light-harvesting protein, partial [Symbiodinium sp. C3]	353	26839	167	82	5	3	2747	4	1	1	543.799	1085.58	2	1085.58	-0.0002	1	30.75	24	K	KLNAEIANGR	L	Deamidated (NQ)	0.0000000100.0			Elution from: 25.908 to 25.908 period: 0 experiment: 1 cycles: 1 precIntensity: 59975.0 FinneganScanNumber: 1781 MStype: enumIsNormalMS rawFile: 16H146_5_120M.raw
15	gi|306430553	light-harvesting protein, partial [Symbiodinium sp. C3]	353	26839	167	82	5	3	2752	1	1	1	543.799	1085.58	2	1085.58	-0.0001	1	71.29	0.0021	K	KLNAEIANGR	L	Deamidated (NQ)	0.0000000100.0			Elution from: 19.505 to 19.505 period: 0 experiment: 1 cycles: 1 precIntensity: 95950.0 FinneganScanNumber: 1162 MStype: enumIsNormalMS rawFile: 16H146_5_120M.raw
15	gi|306430553	light-harvesting protein, partial [Symbiodinium sp. C3]	353	26839	167	82	5	3	2755	1	1	1	543.799	1085.58	2	1085.58	0	1	34.62	9.8	K	KLNAEIANGR	L	Deamidated (NQ)	0.0000000100.0			Elution from: 41.288 to 41.288 period: 0 experiment: 1 cycles: 1 precIntensity: 53829.0 FinneganScanNumber: 3342 MStype: enumIsNormalMS rawFile: 16H146_5_120M.raw
15	gi|306430553	light-harvesting protein, partial [Symbiodinium sp. C3]	353	26839	167	82	5	3	2756	1	1	1	543.799	1085.58	2	1085.58	0.0001	1	47.84	0.46	K	KLNAEIANGR	L	Deamidated (NQ)	0.0000000100.0			Elution from: 37.710 to 37.710 period: 0 experiment: 1 cycles: 1 precIntensity: 46409.0 FinneganScanNumber: 2969 MStype: enumIsNormalMS rawFile: 16H146_5_120M.raw
15	gi|306430553	light-harvesting protein, partial [Symbiodinium sp. C3]	353	26839	167	82	5	3	2757	1	1	1	543.799	1085.58	2	1085.58	0.0002	1	31.11	22	K	KLNAEIANGR	L	Deamidated (NQ)	0.0000000100.0			Elution from: 32.023 to 32.023 period: 0 experiment: 1 cycles: 1 precIntensity: 57801.0 FinneganScanNumber: 2387 MStype: enumIsNormalMS rawFile: 16H146_5_120M.raw
15	gi|306430553	light-harvesting protein, partial [Symbiodinium sp. C3]	353	26839	167	82	5	3	2758	2	1	1	543.799	1085.58	2	1085.58	0.0002	1	23.01	140	K	KLNAEIANGR	L	Deamidated (NQ)	0.0000000100.0			Elution from: 33.878 to 33.878 period: 0 experiment: 1 cycles: 1 precIntensity: 46370.0 FinneganScanNumber: 2578 MStype: enumIsNormalMS rawFile: 16H146_5_120M.raw
15	gi|306430553	light-harvesting protein, partial [Symbiodinium sp. C3]	353	26839	167	82	5	3	2762	1	1	1	543.799	1085.58	2	1085.58	0.0004	1	50.59	0.25	K	KLNAEIANGR	L	Deamidated (NQ)	0.0000000100.0			Elution from: 27.297 to 27.297 period: 0 experiment: 1 cycles: 1 precIntensity: 13447.0 FinneganScanNumber: 1917 MStype: enumIsNormalMS rawFile: 16H146_5_120M.raw
15	gi|306430553	light-harvesting protein, partial [Symbiodinium sp. C3]	353	26839	167	82	5	3	2768	1	1	1	543.799	1085.58	2	1085.58	0.0006	1	29.35	33	K	KLNAEIANGR	L	Deamidated (NQ)	0.0000000100.0			Elution from: 32.098 to 32.098 period: 0 experiment: 1 cycles: 1 precIntensity: 42479.0 FinneganScanNumber: 2396 MStype: enumIsNormalMS rawFile: 16H146_5_120M.raw
15	gi|306430553	light-harvesting protein, partial [Symbiodinium sp. C3]	353	26839	167	82	5	3	2770	1	1	1	543.799	1085.58	2	1085.58	0.0009	1	31.17	22	K	KLNAEIANGR	L	Deamidated (NQ)	0.0000000100.0			Elution from: 29.480 to 29.480 period: 0 experiment: 1 cycles: 1 precIntensity: 57596.0 FinneganScanNumber: 2133 MStype: enumIsNormalMS rawFile: 16H146_5_120M.raw
15	gi|306430553	light-harvesting protein, partial [Symbiodinium sp. C3]	353	26839	167	82	5	3	2771	6	1	1	543.799	1085.58	2	1085.58	0.001	1	32.77	15	K	KLNAEIANGR	L	Deamidated (NQ)	0.0000000100.0			Elution from: 34.105 to 34.105 period: 0 experiment: 1 cycles: 1 precIntensity: 43161.0 FinneganScanNumber: 2601 MStype: enumIsNormalMS rawFile: 16H146_5_120M.raw
15	gi|306430553	light-harvesting protein, partial [Symbiodinium sp. C3]	353	26839	167	82	5	3	2772	1	1	1	543.799	1085.58	2	1085.58	0.001	1	37.73	4.8	K	KLNAEIANGR	L	Deamidated (NQ)	0.0000000100.0			Elution from: 47.868 to 47.868 period: 0 experiment: 1 cycles: 1 precIntensity: 44662.0 FinneganScanNumber: 4046 MStype: enumIsNormalMS rawFile: 16H146_5_120M.raw
15	gi|306430553	light-harvesting protein, partial [Symbiodinium sp. C3]	353	26839	167	82	5	3	2773	1	1	1	543.799	1085.58	2	1085.58	0.0011	1	44.61	0.98	K	KLNAEIANGR	L	Deamidated (NQ)	0.0000000100.0			Elution from: 29.357 to 29.357 period: 0 experiment: 1 cycles: 1 precIntensity: 38904.0 FinneganScanNumber: 2121 MStype: enumIsNormalMS rawFile: 16H146_5_120M.raw
15	gi|306430553	light-harvesting protein, partial [Symbiodinium sp. C3]	353	26839	167	82	5	3	2774	1	1	1	543.8	1085.59	2	1085.58	0.0031	1	42.6	1.7	K	KLNAEIANGR	L	Deamidated (NQ)	0.0000000100.0			Elution from: 33.325 to 33.325 period: 0 experiment: 1 cycles: 1 precIntensity: 35124.0 FinneganScanNumber: 2523 MStype: enumIsNormalMS rawFile: 16H146_5_120M.raw
15	gi|306430553	light-harvesting protein, partial [Symbiodinium sp. C3]	353	26839	167	82	5	3	3635	2	1	1	618.835	1235.65	2	1235.65	-0.0003	0	27.73	41	K	FPGYLSPSAGLK	F					Elution from: 114.757 to 114.757 period: 0 experiment: 1 cycles: 1 precIntensity: 74395.0 FinneganScanNumber: 10525 MStype: enumIsNormalMS rawFile: 16H146_5_120M.raw
15	gi|306430553	light-harvesting protein, partial [Symbiodinium sp. C3]	353	26839	167	82	5	3	3636	4	1	1	618.835	1235.65	2	1235.65	0	0	31.84	16	K	FPGYLSPSAGLK	F					Elution from: 110.403 to 110.403 period: 0 experiment: 1 cycles: 1 precIntensity: 146812.0 FinneganScanNumber: 10062 MStype: enumIsNormalMS rawFile: 16H146_5_120M.raw
15	gi|306430553	light-harvesting protein, partial [Symbiodinium sp. C3]	353	26839	167	82	5	3	3638	1	1	1	618.835	1235.66	2	1235.65	0.0001	0	44.2	0.92	K	FPGYLSPSAGLK	F					Elution from: 112.555 to 112.555 period: 0 experiment: 1 cycles: 1 precIntensity: 209848.0 FinneganScanNumber: 10295 MStype: enumIsNormalMS rawFile: 16H146_5_120M.raw
15	gi|306430553	light-harvesting protein, partial [Symbiodinium sp. C3]	353	26839	167	82	5	3	3639	3	1	1	618.835	1235.66	2	1235.65	0.0003	0	29.12	30	K	FPGYLSPSAGLK	F					Elution from: 112.498 to 112.498 period: 0 experiment: 1 cycles: 1 precIntensity: 181452.0 FinneganScanNumber: 10289 MStype: enumIsNormalMS rawFile: 16H146_5_120M.raw
15	gi|306430553	light-harvesting protein, partial [Symbiodinium sp. C3]	353	26839	167	82	5	3	3643	2	1	1	618.835	1235.66	2	1235.65	0.0011	0	33.94	14	K	FPGYLSPSAGLK	F					Elution from: 64.578 to 64.578 period: 0 experiment: 1 cycles: 1 precIntensity: 283444.0 FinneganScanNumber: 5835 MStype: enumIsNormalMS rawFile: 16H146_5_120M.raw
15	gi|306430553	light-harvesting protein, partial [Symbiodinium sp. C3]	353	26839	167	82	5	3	4249	7	1	1	651.857	1301.7	2	1301.7	0.0015	0	31.47	25	K	FADVPNGLAAISK	V					Elution from: 102.180 to 102.180 period: 0 experiment: 1 cycles: 1 precIntensity: 2208999.0 FinneganScanNumber: 9306 MStype: enumIsNormalMS rawFile: 16H146_5_120M.raw
15	gi|306430553	light-harvesting protein, partial [Symbiodinium sp. C3]	353	26839	167	82	5	3	4252	5	1	1	651.857	1301.7	2	1301.7	0.0024	0	32.03	22	K	FADVPNGLAAISK	V					Elution from: 106.328 to 106.328 period: 0 experiment: 1 cycles: 1 precIntensity: 2513728.0 FinneganScanNumber: 9671 MStype: enumIsNormalMS rawFile: 16H146_5_120M.raw
15	gi|306430553	light-harvesting protein, partial [Symbiodinium sp. C3]	353	26839	167	82	5	3	4255	5	1	1	652.348	1302.68	2	1302.68	-0.0002	0	33.15	17	K	FADVPNGLAAISK	V	Deamidated (NQ)	0.0000010000000.0			Elution from: 88.888 to 88.888 period: 0 experiment: 1 cycles: 1 precIntensity: 1042014.0 FinneganScanNumber: 8150 MStype: enumIsNormalMS rawFile: 16H146_5_120M.raw
15	gi|306430553	light-harvesting protein, partial [Symbiodinium sp. C3]	353	26839	167	82	5	3	4257	4	1	1	652.348	1302.68	2	1302.68	0	0	29.1	43	K	FADVPNGLAAISK	V	Deamidated (NQ)	0.0000010000000.0			Elution from: 88.827 to 88.827 period: 0 experiment: 1 cycles: 1 precIntensity: 941140.0 FinneganScanNumber: 8144 MStype: enumIsNormalMS rawFile: 16H146_5_120M.raw
15	gi|306430553	light-harvesting protein, partial [Symbiodinium sp. C3]	353	26839	167	82	5	3	4266	6	1	1	652.348	1302.68	2	1302.68	0.0002	0	32.47	18	K	FADVPNGLAAISK	V	Deamidated (NQ)	0.0000010000000.0			Elution from: 112.663 to 112.663 period: 0 experiment: 1 cycles: 1 precIntensity: 887841.0 FinneganScanNumber: 10307 MStype: enumIsNormalMS rawFile: 16H146_5_120M.raw
15	gi|306430553	light-harvesting protein, partial [Symbiodinium sp. C3]	353	26839	167	82	5	3	4268	6	1	1	652.348	1302.68	2	1302.68	0.0002	0	29.2	38	K	FADVPNGLAAISK	V	Deamidated (NQ)	0.0000010000000.0			Elution from: 65.650 to 65.650 period: 0 experiment: 1 cycles: 1 precIntensity: 2606090.0 FinneganScanNumber: 5943 MStype: enumIsNormalMS rawFile: 16H146_5_120M.raw
15	gi|306430553	light-harvesting protein, partial [Symbiodinium sp. C3]	353	26839	167	82	5	3	4279	2	1	1	652.349	1302.68	2	1302.68	0.0007	0	46.2	0.75	K	FADVPNGLAAISK	V	Deamidated (NQ)	0.0000010000000.0			Elution from: 67.675 to 67.675 period: 0 experiment: 1 cycles: 1 precIntensity: 1726427.0 FinneganScanNumber: 6153 MStype: enumIsNormalMS rawFile: 16H146_5_120M.raw
15	gi|306430553	light-harvesting protein, partial [Symbiodinium sp. C3]	353	26839	167	82	5	3	4285	8	1	1	652.349	1302.68	2	1302.68	0.001	0	31.16	28	K	FADVPNGLAAISK	V	Deamidated (NQ)	0.0000010000000.0			Elution from: 93.012 to 93.012 period: 0 experiment: 1 cycles: 1 precIntensity: 815749.0 FinneganScanNumber: 8511 MStype: enumIsNormalMS rawFile: 16H146_5_120M.raw
15	gi|306430553	light-harvesting protein, partial [Symbiodinium sp. C3]	353	26839	167	82	5	3	6792	1	1	0	913.475	1824.93	2	1824.94	-0.0019	0	117.1	6.5e-08	R	ISMLATMGYITPEITGK	F					Elution from: 116.443 to 116.443 period: 0 experiment: 1 cycles: 1 precIntensity: 6749073.0 FinneganScanNumber: 10702 MStype: enumIsNormalMS rawFile: 16H146_5_120M.raw
15	gi|306430553	light-harvesting protein, partial [Symbiodinium sp. C3]	353	26839	167	82	5	3	6793	1	1	0	913.475	1824.94	2	1824.94	-0.0006	0	83.28	0.00015	R	ISMLATMGYITPEITGK	F					Elution from: 116.397 to 116.397 period: 0 experiment: 1 cycles: 1 precIntensity: 1543043.0 FinneganScanNumber: 10696 MStype: enumIsNormalMS rawFile: 16H146_5_120M.raw
15	gi|306430553	light-harvesting protein, partial [Symbiodinium sp. C3]	353	26839	167	82	5	3	6840	1	1	0	921.469	1840.92	2	1840.93	-0.0072	0	74.63	0.0012	R	ISMLATMGYITPEITGK	F	Oxidation (M)	0.00000020000000000.0			Elution from: 72.652 to 72.652 period: 0 experiment: 1 cycles: 1 precIntensity: 42659.0 FinneganScanNumber: 6657 MStype: enumIsNormalMS rawFile: 16H146_5_120M.raw
15	gi|306430553	light-harvesting protein, partial [Symbiodinium sp. C3]	353	26839	167	82	5	3	6841	1	1	0	921.47	1840.93	2	1840.93	-0.0055	0	54	0.13	R	ISMLATMGYITPEITGK	F	Oxidation (M)	0.00000020000000000.0			Elution from: 72.533 to 72.533 period: 0 experiment: 1 cycles: 1 precIntensity: 38521.0 FinneganScanNumber: 6643 MStype: enumIsNormalMS rawFile: 16H146_5_120M.raw
15	gi|306430553	light-harvesting protein, partial [Symbiodinium sp. C3]	353	26839	167	82	5	3	6842	1	1	0	921.472	1840.93	2	1840.93	-0.0012	0	52.31	0.2	R	ISMLATMGYITPEITGK	F	Oxidation (M)	0.00000020000000000.0			Elution from: 118.122 to 118.122 period: 0 experiment: 1 cycles: 1 precIntensity: 10846.0 FinneganScanNumber: 10881 MStype: enumIsNormalMS rawFile: 16H146_5_120M.raw
15	gi|306430553	light-harvesting protein, partial [Symbiodinium sp. C3]	353	26839	167	82	5	3	6843	2	1	0	921.473	1840.93	2	1840.93	-0.0006	0	45.09	1	R	ISMLATMGYITPEITGK	F	Oxidation (M)	0.00000020000000000.0			Elution from: 102.973 to 102.973 period: 0 experiment: 1 cycles: 1 precIntensity: 15218.0 FinneganScanNumber: 9374 MStype: enumIsNormalMS rawFile: 16H146_5_120M.raw
15	gi|306430553	light-harvesting protein, partial [Symbiodinium sp. C3]	353	26839	167	82	5	3	6844	1	1	0	921.473	1840.93	2	1840.93	0.0004	0	82.91	0.00016	R	ISMLATMGYITPEITGK	F	Oxidation (M)	0.00000020000000000.0			Elution from: 100.780 to 100.780 period: 0 experiment: 1 cycles: 1 precIntensity: 18959.0 FinneganScanNumber: 9185 MStype: enumIsNormalMS rawFile: 16H146_5_120M.raw
15	gi|306430553	light-harvesting protein, partial [Symbiodinium sp. C3]	353	26839	167	82	5	3	6845	2	1	0	921.474	1840.93	2	1840.93	0.0019	0	67.08	0.0061	R	ISMLATMGYITPEITGK	F	Oxidation (M)	0.00000020000000000.0			Elution from: 102.915 to 102.915 period: 0 experiment: 1 cycles: 1 precIntensity: 17695.0 FinneganScanNumber: 9369 MStype: enumIsNormalMS rawFile: 16H146_5_120M.raw
15	gi|306430553	light-harvesting protein, partial [Symbiodinium sp. C3]	353	26839	167	82	5	3	6846	1	1	0	921.474	1840.93	2	1840.93	0.0021	0	104.82	1.1e-06	R	ISMLATMGYITPEITGK	F	Oxidation (M)	0.00200000000000000.0			Elution from: 115.960 to 115.960 period: 0 experiment: 1 cycles: 1 precIntensity: 2972887.0 FinneganScanNumber: 10636 MStype: enumIsNormalMS rawFile: 16H146_5_120M.raw
15	gi|306430553	light-harvesting protein, partial [Symbiodinium sp. C3]	353	26839	167	82	5	3	6847	1	1	0	921.474	1840.93	2	1840.93	0.0022	0	85.25	9.6e-05	R	ISMLATMGYITPEITGK	F	Oxidation (M)	0.00200000000000000.0			Elution from: 84.170 to 84.170 period: 0 experiment: 1 cycles: 1 precIntensity: 383719.0 FinneganScanNumber: 7730 MStype: enumIsNormalMS rawFile: 16H146_5_120M.raw
15	gi|306430553	light-harvesting protein, partial [Symbiodinium sp. C3]	353	26839	167	82	5	3	6848	1	1	0	921.474	1840.93	2	1840.93	0.0022	0	45.52	0.9	R	ISMLATMGYITPEITGK	F	Oxidation (M)	0.00000020000000000.0			Elution from: 118.382 to 118.382 period: 0 experiment: 1 cycles: 1 precIntensity: 6985.0 FinneganScanNumber: 10902 MStype: enumIsNormalMS rawFile: 16H146_5_120M.raw
15	gi|306430553	light-harvesting protein, partial [Symbiodinium sp. C3]	353	26839	167	82	5	3	6849	1	1	0	921.474	1840.93	2	1840.93	0.0023	0	99.92	3.3e-06	R	ISMLATMGYITPEITGK	F	Oxidation (M)	0.00000020000000000.0			Elution from: 116.010 to 116.010 period: 0 experiment: 1 cycles: 1 precIntensity: 3605409.0 FinneganScanNumber: 10642 MStype: enumIsNormalMS rawFile: 16H146_5_120M.raw
15	gi|306430553	light-harvesting protein, partial [Symbiodinium sp. C3]	353	26839	167	82	5	3	6850	1	1	0	921.474	1840.93	2	1840.93	0.0024	0	83.23	0.00015	R	ISMLATMGYITPEITGK	F	Oxidation (M)	0.00000020000000000.0			Elution from: 82.097 to 82.097 period: 0 experiment: 1 cycles: 1 precIntensity: 64479.0 FinneganScanNumber: 7544 MStype: enumIsNormalMS rawFile: 16H146_5_120M.raw
15	gi|306430553	light-harvesting protein, partial [Symbiodinium sp. C3]	353	26839	167	82	5	3	6851	1	1	0	921.474	1840.93	2	1840.93	0.0026	0	70.74	0.003	R	ISMLATMGYITPEITGK	F	Oxidation (M)	0.00000020000000000.0			Elution from: 100.852 to 100.852 period: 0 experiment: 1 cycles: 1 precIntensity: 32670.0 FinneganScanNumber: 9191 MStype: enumIsNormalMS rawFile: 16H146_5_120M.raw
15	gi|306430553	light-harvesting protein, partial [Symbiodinium sp. C3]	353	26839	167	82	5	3	6852	1	1	0	921.474	1840.93	2	1840.93	0.0027	0	89.95	3.6e-05	R	ISMLATMGYITPEITGK	F	Oxidation (M)	0.00200000000000000.0			Elution from: 84.232 to 84.232 period: 0 experiment: 1 cycles: 1 precIntensity: 490881.0 FinneganScanNumber: 7736 MStype: enumIsNormalMS rawFile: 16H146_5_120M.raw
15	gi|306430553	light-harvesting protein, partial [Symbiodinium sp. C3]	353	26839	167	82	5	3	6853	1	1	0	921.475	1840.93	2	1840.93	0.003	0	115.29	1e-07	R	ISMLATMGYITPEITGK	F	Oxidation (M)	0.00000020000000000.0			Elution from: 86.237 to 86.237 period: 0 experiment: 1 cycles: 1 precIntensity: 38228.0 FinneganScanNumber: 7916 MStype: enumIsNormalMS rawFile: 16H146_5_120M.raw
15	gi|306430553	light-harvesting protein, partial [Symbiodinium sp. C3]	353	26839	167	82	5	3	6854	1	1	0	921.475	1840.93	2	1840.93	0.0031	0	57.85	0.058	R	ISMLATMGYITPEITGK	F	Oxidation (M)	0.00200000000000000.0			Elution from: 88.420 to 88.420 period: 0 experiment: 1 cycles: 1 precIntensity: 47755.0 FinneganScanNumber: 8108 MStype: enumIsNormalMS rawFile: 16H146_5_120M.raw
15	gi|306430553	light-harvesting protein, partial [Symbiodinium sp. C3]	353	26839	167	82	5	3	6855	1	1	0	921.475	1840.93	2	1840.93	0.0031	0	79.79	0.00037	R	ISMLATMGYITPEITGK	F	Oxidation (M)	0.00000020000000000.0			Elution from: 82.067 to 82.067 period: 0 experiment: 1 cycles: 1 precIntensity: 36720.0 FinneganScanNumber: 7541 MStype: enumIsNormalMS rawFile: 16H146_5_120M.raw
15	gi|306430553	light-harvesting protein, partial [Symbiodinium sp. C3]	353	26839	167	82	5	3	6856	1	1	0	921.477	1840.94	2	1840.93	0.008	0	59.91	0.034	R	ISMLATMGYITPEITGK	F	Oxidation (M)	0.00000020000000000.0			Elution from: 98.225 to 98.225 period: 0 experiment: 1 cycles: 1 precIntensity: 10056.0 FinneganScanNumber: 8965 MStype: enumIsNormalMS rawFile: 16H146_5_120M.raw
15	gi|306430553	light-harvesting protein, partial [Symbiodinium sp. C3]	353	26839	167	82	5	3	6906	1	1	0	929.469	1856.92	2	1856.93	-0.0026	0	89.68	3.6e-05	R	ISMLATMGYITPEITGK	F	2 Oxidation (M)	0.00200020000000000.0			Elution from: 99.803 to 99.803 period: 0 experiment: 1 cycles: 1 precIntensity: 156266.0 FinneganScanNumber: 9101 MStype: enumIsNormalMS rawFile: 16H146_5_120M.raw
15	gi|306430553	light-harvesting protein, partial [Symbiodinium sp. C3]	353	26839	167	82	5	3	6907	1	1	0	929.469	1856.92	2	1856.93	-0.0022	0	80.62	0.00029	R	ISMLATMGYITPEITGK	F	2 Oxidation (M)	0.00200020000000000.0			Elution from: 108.217 to 108.217 period: 0 experiment: 1 cycles: 1 precIntensity: 86125.0 FinneganScanNumber: 9845 MStype: enumIsNormalMS rawFile: 16H146_5_120M.raw
15	gi|306430553	light-harvesting protein, partial [Symbiodinium sp. C3]	353	26839	167	82	5	3	6908	1	1	0	929.469	1856.92	2	1856.93	-0.0021	0	101.13	2.6e-06	R	ISMLATMGYITPEITGK	F	2 Oxidation (M)	0.00200020000000000.0			Elution from: 80.920 to 80.920 period: 0 experiment: 1 cycles: 1 precIntensity: 197164.0 FinneganScanNumber: 7436 MStype: enumIsNormalMS rawFile: 16H146_5_120M.raw
15	gi|306430553	light-harvesting protein, partial [Symbiodinium sp. C3]	353	26839	167	82	5	3	6909	1	1	0	929.469	1856.92	2	1856.93	-0.002	0	89.37	3.9e-05	R	ISMLATMGYITPEITGK	F	2 Oxidation (M)	0.00200020000000000.0			Elution from: 68.472 to 68.472 period: 0 experiment: 1 cycles: 1 precIntensity: 383735.0 FinneganScanNumber: 6237 MStype: enumIsNormalMS rawFile: 16H146_5_120M.raw
15	gi|306430553	light-harvesting protein, partial [Symbiodinium sp. C3]	353	26839	167	82	5	3	6910	1	1	0	929.47	1856.92	2	1856.93	-0.002	0	61.59	0.023	R	ISMLATMGYITPEITGK	F	2 Oxidation (M)	0.00200020000000000.0			Elution from: 112.408 to 112.408 period: 0 experiment: 1 cycles: 1 precIntensity: 58733.0 FinneganScanNumber: 10279 MStype: enumIsNormalMS rawFile: 16H146_5_120M.raw
15	gi|306430553	light-harvesting protein, partial [Symbiodinium sp. C3]	353	26839	167	82	5	3	6911	1	1	0	929.47	1856.92	2	1856.93	-0.0019	0	77.23	0.00064	R	ISMLATMGYITPEITGK	F	2 Oxidation (M)	0.00200020000000000.0			Elution from: 95.573 to 95.573 period: 0 experiment: 1 cycles: 1 precIntensity: 292047.0 FinneganScanNumber: 8735 MStype: enumIsNormalMS rawFile: 16H146_5_120M.raw
15	gi|306430553	light-harvesting protein, partial [Symbiodinium sp. C3]	353	26839	167	82	5	3	6912	1	1	0	929.47	1856.92	2	1856.93	-0.0016	0	104.15	1.3e-06	R	ISMLATMGYITPEITGK	F	2 Oxidation (M)	0.00200020000000000.0			Elution from: 80.983 to 80.983 period: 0 experiment: 1 cycles: 1 precIntensity: 145833.0 FinneganScanNumber: 7442 MStype: enumIsNormalMS rawFile: 16H146_5_120M.raw
15	gi|306430553	light-harvesting protein, partial [Symbiodinium sp. C3]	353	26839	167	82	5	3	6913	1	1	0	929.47	1856.92	2	1856.93	-0.0016	0	81.11	0.00027	R	ISMLATMGYITPEITGK	F	2 Oxidation (M)	0.00200020000000000.0			Elution from: 89.355 to 89.355 period: 0 experiment: 1 cycles: 1 precIntensity: 332286.0 FinneganScanNumber: 8192 MStype: enumIsNormalMS rawFile: 16H146_5_120M.raw
15	gi|306430553	light-harvesting protein, partial [Symbiodinium sp. C3]	353	26839	167	82	5	3	6914	1	1	0	929.47	1856.92	2	1856.93	-0.0016	0	93.29	1.7e-05	R	ISMLATMGYITPEITGK	F	2 Oxidation (M)	0.00200020000000000.0			Elution from: 83.090 to 83.090 period: 0 experiment: 1 cycles: 1 precIntensity: 293029.0 FinneganScanNumber: 7634 MStype: enumIsNormalMS rawFile: 16H146_5_120M.raw
15	gi|306430553	light-harvesting protein, partial [Symbiodinium sp. C3]	353	26839	167	82	5	3	6915	1	1	0	929.47	1856.93	2	1856.93	-0.0013	0	77.49	0.00063	R	ISMLATMGYITPEITGK	F	2 Oxidation (M)	0.00200020000000000.0			Elution from: 97.765 to 97.765 period: 0 experiment: 1 cycles: 1 precIntensity: 259667.0 FinneganScanNumber: 8925 MStype: enumIsNormalMS rawFile: 16H146_5_120M.raw
15	gi|306430553	light-harvesting protein, partial [Symbiodinium sp. C3]	353	26839	167	82	5	3	6916	1	1	0	929.47	1856.93	2	1856.93	-0.0013	0	74.77	0.0012	R	ISMLATMGYITPEITGK	F	2 Oxidation (M)	0.00200020000000000.0			Elution from: 66.407 to 66.407 period: 0 experiment: 1 cycles: 1 precIntensity: 99309.0 FinneganScanNumber: 6021 MStype: enumIsNormalMS rawFile: 16H146_5_120M.raw
15	gi|306430553	light-harvesting protein, partial [Symbiodinium sp. C3]	353	26839	167	82	5	3	6917	1	1	0	929.47	1856.93	2	1856.93	-0.0011	0	83.91	0.00014	R	ISMLATMGYITPEITGK	F	2 Oxidation (M)	0.00200020000000000.0			Elution from: 72.630 to 72.630 period: 0 experiment: 1 cycles: 1 precIntensity: 271003.0 FinneganScanNumber: 6654 MStype: enumIsNormalMS rawFile: 16H146_5_120M.raw
15	gi|306430553	light-harvesting protein, partial [Symbiodinium sp. C3]	353	26839	167	82	5	3	6918	1	1	0	929.47	1856.93	2	1856.93	-0.0008	0	85.64	9.5e-05	R	ISMLATMGYITPEITGK	F	2 Oxidation (M)	0.00200020000000000.0			Elution from: 70.557 to 70.557 period: 0 experiment: 1 cycles: 1 precIntensity: 580804.0 FinneganScanNumber: 6449 MStype: enumIsNormalMS rawFile: 16H146_5_120M.raw
15	gi|306430553	light-harvesting protein, partial [Symbiodinium sp. C3]	353	26839	167	82	5	3	6919	1	1	0	929.47	1856.93	2	1856.93	-0.0008	0	64.54	0.012	R	ISMLATMGYITPEITGK	F	2 Oxidation (M)	0.00200020000000000.0			Elution from: 103.995 to 103.995 period: 0 experiment: 1 cycles: 1 precIntensity: 107385.0 FinneganScanNumber: 9463 MStype: enumIsNormalMS rawFile: 16H146_5_120M.raw
15	gi|306430553	light-harvesting protein, partial [Symbiodinium sp. C3]	353	26839	167	82	5	3	6920	1	1	0	929.47	1856.93	2	1856.93	-0.0006	0	82.64	0.00019	R	ISMLATMGYITPEITGK	F	2 Oxidation (M)	0.00200020000000000.0			Elution from: 93.553 to 93.553 period: 0 experiment: 1 cycles: 1 precIntensity: 310744.0 FinneganScanNumber: 8559 MStype: enumIsNormalMS rawFile: 16H146_5_120M.raw
15	gi|306430553	light-harvesting protein, partial [Symbiodinium sp. C3]	353	26839	167	82	5	3	6921	1	1	0	929.47	1856.93	2	1856.93	-0.0004	0	66.23	0.0081	R	ISMLATMGYITPEITGK	F	2 Oxidation (M)	0.00200020000000000.0			Elution from: 106.073 to 106.073 period: 0 experiment: 1 cycles: 1 precIntensity: 63441.0 FinneganScanNumber: 9648 MStype: enumIsNormalMS rawFile: 16H146_5_120M.raw
15	gi|306430553	light-harvesting protein, partial [Symbiodinium sp. C3]	353	26839	167	82	5	3	6922	1	1	0	929.47	1856.93	2	1856.93	-0.0004	0	76.57	0.00075	R	ISMLATMGYITPEITGK	F	2 Oxidation (M)	0.00200020000000000.0			Elution from: 101.863 to 101.863 period: 0 experiment: 1 cycles: 1 precIntensity: 119123.0 FinneganScanNumber: 9278 MStype: enumIsNormalMS rawFile: 16H146_5_120M.raw
15	gi|306430553	light-harvesting protein, partial [Symbiodinium sp. C3]	353	26839	167	82	5	3	6923	1	1	0	929.47	1856.93	2	1856.93	-0.0001	0	48.2	0.5	R	ISMLATMGYITPEITGK	F	2 Oxidation (M)	0.00200020000000000.0			Elution from: 114.625 to 114.625 period: 0 experiment: 1 cycles: 1 precIntensity: 113895.0 FinneganScanNumber: 10511 MStype: enumIsNormalMS rawFile: 16H146_5_120M.raw
15	gi|306430553	light-harvesting protein, partial [Symbiodinium sp. C3]	353	26839	167	82	5	3	6924	1	1	0	929.471	1856.93	2	1856.93	0.0001	0	83.37	0.00015	R	ISMLATMGYITPEITGK	F	2 Oxidation (M)	0.00200020000000000.0			Elution from: 76.782 to 76.782 period: 0 experiment: 1 cycles: 1 precIntensity: 190811.0 FinneganScanNumber: 7055 MStype: enumIsNormalMS rawFile: 16H146_5_120M.raw
15	gi|306430553	light-harvesting protein, partial [Symbiodinium sp. C3]	353	26839	167	82	5	3	6925	1	1	0	929.471	1856.93	2	1856.93	0.0001	0	74.01	0.0013	R	ISMLATMGYITPEITGK	F	2 Oxidation (M)	0.00200020000000000.0			Elution from: 99.787 to 99.787 period: 0 experiment: 1 cycles: 1 precIntensity: 80392.0 FinneganScanNumber: 9099 MStype: enumIsNormalMS rawFile: 16H146_5_120M.raw
15	gi|306430553	light-harvesting protein, partial [Symbiodinium sp. C3]	353	26839	167	82	5	3	6926	1	1	0	929.471	1856.93	2	1856.93	0.0002	0	84.5	0.00012	R	ISMLATMGYITPEITGK	F	2 Oxidation (M)	0.00200020000000000.0			Elution from: 72.580 to 72.580 period: 0 experiment: 1 cycles: 1 precIntensity: 273462.0 FinneganScanNumber: 6648 MStype: enumIsNormalMS rawFile: 16H146_5_120M.raw
15	gi|306430553	light-harvesting protein, partial [Symbiodinium sp. C3]	353	26839	167	82	5	3	6927	1	1	0	929.471	1856.93	2	1856.93	0.0002	0	83.14	0.00016	R	ISMLATMGYITPEITGK	F	2 Oxidation (M)	0.00200020000000000.0			Elution from: 83.027 to 83.027 period: 0 experiment: 1 cycles: 1 precIntensity: 324082.0 FinneganScanNumber: 7628 MStype: enumIsNormalMS rawFile: 16H146_5_120M.raw
15	gi|306430553	light-harvesting protein, partial [Symbiodinium sp. C3]	353	26839	167	82	5	3	6928	1	1	0	929.471	1856.93	2	1856.93	0.0004	0	67.6	0.0058	R	ISMLATMGYITPEITGK	F	2 Oxidation (M)	0.00200020000000000.0			Elution from: 110.308 to 110.308 period: 0 experiment: 1 cycles: 1 precIntensity: 54587.0 FinneganScanNumber: 10052 MStype: enumIsNormalMS rawFile: 16H146_5_120M.raw
15	gi|306430553	light-harvesting protein, partial [Symbiodinium sp. C3]	353	26839	167	82	5	3	6929	1	1	0	929.471	1856.93	2	1856.93	0.0005	0	84.54	0.00012	R	ISMLATMGYITPEITGK	F	2 Oxidation (M)	0.00200020000000000.0			Elution from: 85.115 to 85.115 period: 0 experiment: 1 cycles: 1 precIntensity: 363826.0 FinneganScanNumber: 7814 MStype: enumIsNormalMS rawFile: 16H146_5_120M.raw
15	gi|306430553	light-harvesting protein, partial [Symbiodinium sp. C3]	353	26839	167	82	5	3	6930	1	1	0	929.471	1856.93	2	1856.93	0.0006	0	74.22	0.0013	R	ISMLATMGYITPEITGK	F	2 Oxidation (M)	0.00200020000000000.0			Elution from: 101.930 to 101.930 period: 0 experiment: 1 cycles: 1 precIntensity: 110530.0 FinneganScanNumber: 9284 MStype: enumIsNormalMS rawFile: 16H146_5_120M.raw
15	gi|306430553	light-harvesting protein, partial [Symbiodinium sp. C3]	353	26839	167	82	5	3	6931	1	1	0	929.471	1856.93	2	1856.93	0.0008	0	102.9	1.7e-06	R	ISMLATMGYITPEITGK	F	2 Oxidation (M)	0.00200020000000000.0			Elution from: 91.397 to 91.397 period: 0 experiment: 1 cycles: 1 precIntensity: 321089.0 FinneganScanNumber: 8371 MStype: enumIsNormalMS rawFile: 16H146_5_120M.raw
15	gi|306430553	light-harvesting protein, partial [Symbiodinium sp. C3]	353	26839	167	82	5	3	6932	1	1	0	929.471	1856.93	2	1856.93	0.0009	0	112.94	1.7e-07	R	ISMLATMGYITPEITGK	F	2 Oxidation (M)	0.00200020000000000.0			Elution from: 70.505 to 70.505 period: 0 experiment: 1 cycles: 1 precIntensity: 848807.0 FinneganScanNumber: 6444 MStype: enumIsNormalMS rawFile: 16H146_5_120M.raw
15	gi|306430553	light-harvesting protein, partial [Symbiodinium sp. C3]	353	26839	167	82	5	3	6933	1	1	0	929.471	1856.93	2	1856.93	0.0009	0	60.35	0.031	R	ISMLATMGYITPEITGK	F	2 Oxidation (M)	0.00200020000000000.0			Elution from: 112.647 to 112.647 period: 0 experiment: 1 cycles: 1 precIntensity: 52130.0 FinneganScanNumber: 10305 MStype: enumIsNormalMS rawFile: 16H146_5_120M.raw
15	gi|306430553	light-harvesting protein, partial [Symbiodinium sp. C3]	353	26839	167	82	5	3	6934	1	1	0	929.471	1856.93	2	1856.93	0.0011	0	69.94	0.0035	R	ISMLATMGYITPEITGK	F	2 Oxidation (M)	0.00200020000000000.0			Elution from: 108.162 to 108.162 period: 0 experiment: 1 cycles: 1 precIntensity: 89693.0 FinneganScanNumber: 9840 MStype: enumIsNormalMS rawFile: 16H146_5_120M.raw
15	gi|306430553	light-harvesting protein, partial [Symbiodinium sp. C3]	353	26839	167	82	5	3	6935	1	1	0	929.471	1856.93	2	1856.93	0.0017	0	81.87	0.00023	R	ISMLATMGYITPEITGK	F	2 Oxidation (M)	0.00200020000000000.0			Elution from: 110.362 to 110.362 period: 0 experiment: 1 cycles: 1 precIntensity: 62717.0 FinneganScanNumber: 10057 MStype: enumIsNormalMS rawFile: 16H146_5_120M.raw
15	gi|306430553	light-harvesting protein, partial [Symbiodinium sp. C3]	353	26839	167	82	5	3	6936	1	1	0	929.472	1856.93	2	1856.93	0.0028	0	119.18	4.5e-08	R	ISMLATMGYITPEITGK	F	2 Oxidation (M)	0.00200020000000000.0			Elution from: 91.462 to 91.462 period: 0 experiment: 1 cycles: 1 precIntensity: 317837.0 FinneganScanNumber: 8377 MStype: enumIsNormalMS rawFile: 16H146_5_120M.raw
15	gi|306430553	light-harvesting protein, partial [Symbiodinium sp. C3]	353	26839	167	82	5	3	6937	1	1	0	929.472	1856.93	2	1856.93	0.003	0	89.4	4.3e-05	R	ISMLATMGYITPEITGK	F	2 Oxidation (M)	0.00200020000000000.0			Elution from: 97.698 to 97.698 period: 0 experiment: 1 cycles: 1 precIntensity: 269885.0 FinneganScanNumber: 8919 MStype: enumIsNormalMS rawFile: 16H146_5_120M.raw
15	gi|306430553	light-harvesting protein, partial [Symbiodinium sp. C3]	353	26839	167	82	5	3	6938	1	1	0	929.472	1856.93	2	1856.93	0.003	0	99.61	4.1e-06	R	ISMLATMGYITPEITGK	F	2 Oxidation (M)	0.00200020000000000.0			Elution from: 78.800 to 78.800 period: 0 experiment: 1 cycles: 1 precIntensity: 186712.0 FinneganScanNumber: 7241 MStype: enumIsNormalMS rawFile: 16H146_5_120M.raw
15	gi|306430553	light-harvesting protein, partial [Symbiodinium sp. C3]	353	26839	167	82	5	3	6939	1	1	0	929.472	1856.93	2	1856.93	0.0031	0	89.3	4.4e-05	R	ISMLATMGYITPEITGK	F	2 Oxidation (M)	0.00200020000000000.0			Elution from: 74.642 to 74.642 period: 0 experiment: 1 cycles: 1 precIntensity: 203238.0 FinneganScanNumber: 6851 MStype: enumIsNormalMS rawFile: 16H146_5_120M.raw
15	gi|306430553	light-harvesting protein, partial [Symbiodinium sp. C3]	353	26839	167	82	5	3	6940	1	1	0	929.472	1856.93	2	1856.93	0.0034	0	112.39	2e-07	R	ISMLATMGYITPEITGK	F	2 Oxidation (M)	0.00200020000000000.0			Elution from: 87.198 to 87.198 period: 0 experiment: 1 cycles: 1 precIntensity: 348499.0 FinneganScanNumber: 8000 MStype: enumIsNormalMS rawFile: 16H146_5_120M.raw
15	gi|306430553	light-harvesting protein, partial [Symbiodinium sp. C3]	353	26839	167	82	5	3	6941	1	1	0	929.472	1856.93	2	1856.93	0.0035	0	84.49	0.00012	R	ISMLATMGYITPEITGK	F	2 Oxidation (M)	0.00200020000000000.0			Elution from: 78.863 to 78.863 period: 0 experiment: 1 cycles: 1 precIntensity: 187703.0 FinneganScanNumber: 7247 MStype: enumIsNormalMS rawFile: 16H146_5_120M.raw
15	gi|306430553	light-harvesting protein, partial [Symbiodinium sp. C3]	353	26839	167	82	5	3	6942	1	1	0	929.472	1856.93	2	1856.93	0.0035	0	109.36	4e-07	R	ISMLATMGYITPEITGK	F	2 Oxidation (M)	0.00200020000000000.0			Elution from: 89.295 to 89.295 period: 0 experiment: 1 cycles: 1 precIntensity: 318874.0 FinneganScanNumber: 8186 MStype: enumIsNormalMS rawFile: 16H146_5_120M.raw
15	gi|306430553	light-harvesting protein, partial [Symbiodinium sp. C3]	353	26839	167	82	5	3	6943	1	1	0	929.472	1856.93	2	1856.93	0.0037	0	81.75	0.00023	R	ISMLATMGYITPEITGK	F	2 Oxidation (M)	0.00200020000000000.0			Elution from: 87.263 to 87.263 period: 0 experiment: 1 cycles: 1 precIntensity: 348066.0 FinneganScanNumber: 8006 MStype: enumIsNormalMS rawFile: 16H146_5_120M.raw
15	gi|306430553	light-harvesting protein, partial [Symbiodinium sp. C3]	353	26839	167	82	5	3	6944	1	1	0	929.472	1856.93	2	1856.93	0.0037	0	94.8	1.1e-05	R	ISMLATMGYITPEITGK	F	2 Oxidation (M)	0.00200020000000000.0			Elution from: 68.423 to 68.423 period: 0 experiment: 1 cycles: 1 precIntensity: 284263.0 FinneganScanNumber: 6231 MStype: enumIsNormalMS rawFile: 16H146_5_120M.raw
15	gi|306430553	light-harvesting protein, partial [Symbiodinium sp. C3]	353	26839	167	82	5	3	6945	1	1	0	929.472	1856.93	2	1856.93	0.0038	0	81.16	0.00027	R	ISMLATMGYITPEITGK	F	2 Oxidation (M)	0.00200020000000000.0			Elution from: 93.487 to 93.487 period: 0 experiment: 1 cycles: 1 precIntensity: 318431.0 FinneganScanNumber: 8553 MStype: enumIsNormalMS rawFile: 16H146_5_120M.raw
15	gi|306430553	light-harvesting protein, partial [Symbiodinium sp. C3]	353	26839	167	82	5	3	6946	1	1	0	929.472	1856.93	2	1856.93	0.0042	0	92.39	2e-05	R	ISMLATMGYITPEITGK	F	2 Oxidation (M)	0.00200020000000000.0			Elution from: 95.638 to 95.638 period: 0 experiment: 1 cycles: 1 precIntensity: 292989.0 FinneganScanNumber: 8741 MStype: enumIsNormalMS rawFile: 16H146_5_120M.raw
16	gi|872556526	isocitrate dehydrogenase [Marinovum algicola]	340	79397	18	5	6	3	1839	1	1	0	456.766	911.518	2	911.519	-0.0005	0	45.96	0.28	K	GSAVNPVLR	E					Elution from: 23.475 to 23.475 period: 0 experiment: 1 cycles: 1 precIntensity: 55174.0 FinneganScanNumber: 1543 MStype: enumIsNormalMS rawFile: 16H146_5_120M.raw
16	gi|872556526	isocitrate dehydrogenase [Marinovum algicola]	340	79397	18	5	6	3	2987	1	1	1	564.242	1126.47	2	1126.47	-0.0014	0	66.31	0.001	K	VSSMDGNDFR	S					Elution from: 24.560 to 24.560 period: 0 experiment: 1 cycles: 1 precIntensity: 101558.0 FinneganScanNumber: 1649 MStype: enumIsNormalMS rawFile: 16H146_5_120M.raw
16	gi|872556526	isocitrate dehydrogenase [Marinovum algicola]	340	79397	18	5	6	3	2988	1	1	1	564.242	1126.47	2	1126.47	-0.0012	0	50.91	0.035	K	VSSMDGNDFR	S					Elution from: 24.505 to 24.505 period: 0 experiment: 1 cycles: 1 precIntensity: 76457.0 FinneganScanNumber: 1644 MStype: enumIsNormalMS rawFile: 16H146_5_120M.raw
16	gi|872556526	isocitrate dehydrogenase [Marinovum algicola]	340	79397	18	5	6	3	5181	1	1	1	708.863	1415.71	2	1415.71	-0.0021	0	72.86	0.0016	R	QSDDLAELGELVK	Q					Elution from: 85.763 to 85.763 period: 0 experiment: 1 cycles: 1 precIntensity: 45538.0 FinneganScanNumber: 7874 MStype: enumIsNormalMS rawFile: 16H146_5_120M.raw
16	gi|872556526	isocitrate dehydrogenase [Marinovum algicola]	340	79397	18	5	6	3	5183	2	1	1	708.864	1415.71	2	1415.71	-0.0001	0	31.6	23	R	QSDDLAELGELVK	Q					Elution from: 85.708 to 85.708 period: 0 experiment: 1 cycles: 1 precIntensity: 24621.0 FinneganScanNumber: 7869 MStype: enumIsNormalMS rawFile: 16H146_5_120M.raw
16	gi|872556526	isocitrate dehydrogenase [Marinovum algicola]	340	79397	18	5	6	3	5927	1	1	1	791.912	1581.81	2	1581.81	-0.0018	0	56.95	0.055	K	AAGVNPNSGLGDLLER	V					Elution from: 73.487 to 73.487 period: 0 experiment: 1 cycles: 1 precIntensity: 75013.0 FinneganScanNumber: 6738 MStype: enumIsNormalMS rawFile: 16H146_5_120M.raw
16	gi|872556526	isocitrate dehydrogenase [Marinovum algicola]	340	79397	18	5	6	3	5928	1	1	1	791.912	1581.81	2	1581.81	-0.0013	0	59.34	0.031	K	AAGVNPNSGLGDLLER	V					Elution from: 73.328 to 73.328 period: 0 experiment: 1 cycles: 1 precIntensity: 21146.0 FinneganScanNumber: 6723 MStype: enumIsNormalMS rawFile: 16H146_5_120M.raw
16	gi|872556526	isocitrate dehydrogenase [Marinovum algicola]	340	79397	18	5	6	3	5929	1	1	1	791.913	1581.81	2	1581.81	-0.0004	0	56.06	0.078	K	AAGVNPNSGLGDLLER	V					Elution from: 114.197 to 114.197 period: 0 experiment: 1 cycles: 1 precIntensity: 49987.0 FinneganScanNumber: 10465 MStype: enumIsNormalMS rawFile: 16H146_5_120M.raw
16	gi|872556526	isocitrate dehydrogenase [Marinovum algicola]	340	79397	18	5	6	3	5930	1	1	1	791.913	1581.81	2	1581.81	0.0001	0	48.23	0.47	K	AAGVNPNSGLGDLLER	V					Elution from: 112.155 to 112.155 period: 0 experiment: 1 cycles: 1 precIntensity: 70627.0 FinneganScanNumber: 10250 MStype: enumIsNormalMS rawFile: 16H146_5_120M.raw
16	gi|872556526	isocitrate dehydrogenase [Marinovum algicola]	340	79397	18	5	6	3	5931	1	1	1	791.913	1581.81	2	1581.81	0.0001	0	66.45	0.0073	K	AAGVNPNSGLGDLLER	V					Elution from: 73.417 to 73.417 period: 0 experiment: 1 cycles: 1 precIntensity: 74885.0 FinneganScanNumber: 6731 MStype: enumIsNormalMS rawFile: 16H146_5_120M.raw
16	gi|872556526	isocitrate dehydrogenase [Marinovum algicola]	340	79397	18	5	6	3	5932	1	1	1	791.913	1581.81	2	1581.81	0.0011	0	33.43	14	K	AAGVNPNSGLGDLLER	V					Elution from: 112.063 to 112.063 period: 0 experiment: 1 cycles: 1 precIntensity: 78744.0 FinneganScanNumber: 10241 MStype: enumIsNormalMS rawFile: 16H146_5_120M.raw
16	gi|872556526	isocitrate dehydrogenase [Marinovum algicola]	340	79397	18	5	6	3	6033	1	1	1	801.928	1601.84	2	1601.84	-0.0007	0	45.96	0.95	R	IIATFPENLTEAQR	Q					Elution from: 110.993 to 110.993 period: 0 experiment: 1 cycles: 1 precIntensity: 115353.0 FinneganScanNumber: 10121 MStype: enumIsNormalMS rawFile: 16H146_5_120M.raw
16	gi|872556526	isocitrate dehydrogenase [Marinovum algicola]	340	79397	18	5	6	3	6034	1	1	1	801.928	1601.84	2	1601.84	-0.0005	0	55.49	0.11	R	IIATFPENLTEAQR	Q					Elution from: 108.872 to 108.872 period: 0 experiment: 1 cycles: 1 precIntensity: 63417.0 FinneganScanNumber: 9909 MStype: enumIsNormalMS rawFile: 16H146_5_120M.raw
16	gi|872556526	isocitrate dehydrogenase [Marinovum algicola]	340	79397	18	5	6	3	6035	1	1	1	801.929	1601.84	2	1601.84	0.0014	0	54.78	0.12	R	IIATFPENLTEAQR	Q					Elution from: 113.230 to 113.230 period: 0 experiment: 1 cycles: 1 precIntensity: 49592.0 FinneganScanNumber: 10365 MStype: enumIsNormalMS rawFile: 16H146_5_120M.raw
16	gi|872556526	isocitrate dehydrogenase [Marinovum algicola]	340	79397	18	5	6	3	6036	1	1	1	801.929	1601.84	2	1601.84	0.0019	0	44.98	1.2	R	IIATFPENLTEAQR	Q					Elution from: 71.405 to 71.405 period: 0 experiment: 1 cycles: 1 precIntensity: 74480.0 FinneganScanNumber: 6533 MStype: enumIsNormalMS rawFile: 16H146_5_120M.raw
16	gi|872556526	isocitrate dehydrogenase [Marinovum algicola]	340	79397	18	5	6	3	6037	1	1	1	801.929	1601.84	2	1601.84	0.002	0	44.16	1.4	R	IIATFPENLTEAQR	Q					Elution from: 71.470 to 71.470 period: 0 experiment: 1 cycles: 1 precIntensity: 79722.0 FinneganScanNumber: 6539 MStype: enumIsNormalMS rawFile: 16H146_5_120M.raw
16	gi|872556526	isocitrate dehydrogenase [Marinovum algicola]	340	79397	18	5	6	3	6038	1	1	1	801.93	1601.84	2	1601.84	0.0034	0	28.56	60	R	IIATFPENLTEAQR	Q					Elution from: 108.993 to 108.993 period: 0 experiment: 1 cycles: 1 precIntensity: 61793.0 FinneganScanNumber: 9921 MStype: enumIsNormalMS rawFile: 16H146_5_120M.raw
16	gi|872556526	isocitrate dehydrogenase [Marinovum algicola]	340	79397	18	5	6	3	8149	1	1	1	1052.46	3154.35	3	3154.35	0.0028	0	32.84	3.6	K	GWGPDGNEGDSNCVIPDNSYAPVYDESIK	F					Elution from: 106.880 to 106.880 period: 0 experiment: 1 cycles: 1 precIntensity: 37047.0 FinneganScanNumber: 9721 MStype: enumIsNormalMS rawFile: 16H146_5_120M.raw
17	gi|872571186	peptide ABC transporter substrate-binding protein [Marinovum algicola]	321	58396	13	3	6	2	2513	6	1	1	515.78	1029.55	2	1029.55	-0.0001	0	26.94	81	R	VNNADGLTVK	K					Elution from: 18.507 to 18.507 period: 0 experiment: 1 cycles: 1 precIntensity: 67645.0 FinneganScanNumber: 1068 MStype: enumIsNormalMS rawFile: 16H146_5_120M.raw
17	gi|872571186	peptide ABC transporter substrate-binding protein [Marinovum algicola]	321	58396	13	3	6	2	2514	1	1	1	515.78	1029.55	2	1029.55	-0.0001	0	24.83	130	R	VNNADGLTVK	K					Elution from: 20.593 to 20.593 period: 0 experiment: 1 cycles: 1 precIntensity: 26735.0 FinneganScanNumber: 1265 MStype: enumIsNormalMS rawFile: 16H146_5_120M.raw
17	gi|872571186	peptide ABC transporter substrate-binding protein [Marinovum algicola]	321	58396	13	3	6	2	2515	1	1	1	515.78	1029.55	2	1029.55	0	0	44.79	1.3	R	VNNADGLTVK	K					Elution from: 18.577 to 18.577 period: 0 experiment: 1 cycles: 1 precIntensity: 77701.0 FinneganScanNumber: 1074 MStype: enumIsNormalMS rawFile: 16H146_5_120M.raw
17	gi|872571186	peptide ABC transporter substrate-binding protein [Marinovum algicola]	321	58396	13	3	6	2	2631	2	1	1	530.283	1058.55	2	1058.55	-0.0026	0	32.54	19	R	DAIQQVVMR	G					Elution from: 43.407 to 43.407 period: 0 experiment: 1 cycles: 1 precIntensity: 36697.0 FinneganScanNumber: 3572 MStype: enumIsNormalMS rawFile: 16H146_5_120M.raw
17	gi|872571186	peptide ABC transporter substrate-binding protein [Marinovum algicola]	321	58396	13	3	6	2	2632	3	1	1	530.284	1058.55	2	1058.55	0	0	40.59	2.1	R	DAIQQVVMR	G					Elution from: 43.423 to 43.423 period: 0 experiment: 1 cycles: 1 precIntensity: 51663.0 FinneganScanNumber: 3574 MStype: enumIsNormalMS rawFile: 16H146_5_120M.raw
17	gi|872571186	peptide ABC transporter substrate-binding protein [Marinovum algicola]	321	58396	13	3	6	2	3007	1	1	1	565.782	1129.55	2	1129.55	-0.0015	0	29.05	22	R	NQDIADIWR	V					Elution from: 64.857 to 64.857 period: 0 experiment: 1 cycles: 1 precIntensity: 87249.0 FinneganScanNumber: 5865 MStype: enumIsNormalMS rawFile: 16H146_5_120M.raw
17	gi|872571186	peptide ABC transporter substrate-binding protein [Marinovum algicola]	321	58396	13	3	6	2	3008	1	1	1	565.783	1129.55	2	1129.55	-0.0004	0	27.56	30	R	NQDIADIWR	V					Elution from: 64.837 to 64.837 period: 0 experiment: 1 cycles: 1 precIntensity: 47650.0 FinneganScanNumber: 5863 MStype: enumIsNormalMS rawFile: 16H146_5_120M.raw
17	gi|872571186	peptide ABC transporter substrate-binding protein [Marinovum algicola]	321	58396	13	3	6	2	3009	1	1	1	565.783	1129.55	2	1129.55	-0.0003	0	26.28	40	R	NQDIADIWR	V					Elution from: 66.315 to 66.315 period: 0 experiment: 1 cycles: 1 precIntensity: 33710.0 FinneganScanNumber: 6012 MStype: enumIsNormalMS rawFile: 16H146_5_120M.raw
17	gi|872571186	peptide ABC transporter substrate-binding protein [Marinovum algicola]	321	58396	13	3	6	2	5191	1	1	1	709.859	1417.7	2	1417.7	-0.0017	0	82.77	0.00017	K	IESLASNTDLEAR	N					Elution from: 41.603 to 41.603 period: 0 experiment: 1 cycles: 1 precIntensity: 74807.0 FinneganScanNumber: 3378 MStype: enumIsNormalMS rawFile: 16H146_5_120M.raw
17	gi|872571186	peptide ABC transporter substrate-binding protein [Marinovum algicola]	321	58396	13	3	6	2	5192	1	1	1	709.859	1417.7	2	1417.7	-0.0012	0	67.68	0.0056	K	IESLASNTDLEAR	N					Elution from: 41.572 to 41.572 period: 0 experiment: 1 cycles: 1 precIntensity: 53018.0 FinneganScanNumber: 3374 MStype: enumIsNormalMS rawFile: 16H146_5_120M.raw
17	gi|872571186	peptide ABC transporter substrate-binding protein [Marinovum algicola]	321	58396	13	3	6	2	5688	1	1	1	763.851	1525.69	2	1525.69	-0.0001	0	47.4	0.28	K	TVMEINEEYWGR	D					Elution from: 72.250 to 72.250 period: 0 experiment: 1 cycles: 1 precIntensity: 25730.0 FinneganScanNumber: 6614 MStype: enumIsNormalMS rawFile: 16H146_5_120M.raw
17	gi|872571186	peptide ABC transporter substrate-binding protein [Marinovum algicola]	321	58396	13	3	6	2	5689	1	1	1	763.851	1525.69	2	1525.69	0.0008	0	39.95	1.5	K	TVMEINEEYWGR	D					Elution from: 72.187 to 72.187 period: 0 experiment: 1 cycles: 1 precIntensity: 20128.0 FinneganScanNumber: 6608 MStype: enumIsNormalMS rawFile: 16H146_5_120M.raw
17	gi|872571186	peptide ABC transporter substrate-binding protein [Marinovum algicola]	321	58396	13	3	6	2	6111	1	1	1	808.373	1614.73	2	1614.73	-0.0034	0	76.22	0.00038	K	ALMEEAGYGDGFSIR	L					Elution from: 74.802 to 74.802 period: 0 experiment: 1 cycles: 1 precIntensity: 39775.0 FinneganScanNumber: 6867 MStype: enumIsNormalMS rawFile: 16H146_5_120M.raw
18	gi|872593271	nitrate ABC transporter substrate-binding protein [Marinovum algicola]	301	35957	15	10	5	3	5042	1	1	1	700.818	1399.62	2	1399.62	-0.0005	0	60.76	0.0093	K	DAGIEGPEDLDNR	T					Elution from: 38.077 to 38.077 period: 0 experiment: 1 cycles: 1 precIntensity: 45539.0 FinneganScanNumber: 3005 MStype: enumIsNormalMS rawFile: 16H146_5_120M.raw
18	gi|872593271	nitrate ABC transporter substrate-binding protein [Marinovum algicola]	301	35957	15	10	5	3	5043	1	1	1	700.818	1399.62	2	1399.62	0.0001	0	51.93	0.065	K	DAGIEGPEDLDNR	T					Elution from: 35.950 to 35.950 period: 0 experiment: 1 cycles: 1 precIntensity: 39665.0 FinneganScanNumber: 2790 MStype: enumIsNormalMS rawFile: 16H146_5_120M.raw
18	gi|872593271	nitrate ABC transporter substrate-binding protein [Marinovum algicola]	301	35957	15	10	5	3	5044	1	1	1	700.818	1399.62	2	1399.62	0.0002	0	68.52	0.0014	K	DAGIEGPEDLDNR	T					Elution from: 36.007 to 36.007 period: 0 experiment: 1 cycles: 1 precIntensity: 52918.0 FinneganScanNumber: 2796 MStype: enumIsNormalMS rawFile: 16H146_5_120M.raw
18	gi|872593271	nitrate ABC transporter substrate-binding protein [Marinovum algicola]	301	35957	15	10	5	3	5045	1	1	1	700.818	1399.62	2	1399.62	0.0002	0	53.62	0.044	K	DAGIEGPEDLDNR	T					Elution from: 38.138 to 38.138 period: 0 experiment: 1 cycles: 1 precIntensity: 64546.0 FinneganScanNumber: 3011 MStype: enumIsNormalMS rawFile: 16H146_5_120M.raw
18	gi|872593271	nitrate ABC transporter substrate-binding protein [Marinovum algicola]	301	35957	15	10	5	3	5732	1	1	1	770.43	1538.85	2	1538.85	-0.0004	0	24.6	67	R	ENGLPLVNIAQPFK	S					Elution from: 96.217 to 96.217 period: 0 experiment: 1 cycles: 1 precIntensity: 14312.0 FinneganScanNumber: 8791 MStype: enumIsNormalMS rawFile: 16H146_5_120M.raw
18	gi|872593271	nitrate ABC transporter substrate-binding protein [Marinovum algicola]	301	35957	15	10	5	3	5740	1	1	1	770.921	1539.83	2	1539.83	-0.0017	0	35.99	4.7	R	ENGLPLVNIAQPFK	S	Deamidated (NQ)	0.01000000000000.0			Elution from: 98.790 to 98.790 period: 0 experiment: 1 cycles: 1 precIntensity: 13857.0 FinneganScanNumber: 9013 MStype: enumIsNormalMS rawFile: 16H146_5_120M.raw
18	gi|872593271	nitrate ABC transporter substrate-binding protein [Marinovum algicola]	301	35957	15	10	5	3	5741	1	1	1	770.922	1539.83	2	1539.83	-0.0013	0	31.86	12	R	ENGLPLVNIAQPFK	S	Deamidated (NQ)	0.01000000000000.0			Elution from: 98.902 to 98.902 period: 0 experiment: 1 cycles: 1 precIntensity: 16300.0 FinneganScanNumber: 9023 MStype: enumIsNormalMS rawFile: 16H146_5_120M.raw
18	gi|872593271	nitrate ABC transporter substrate-binding protein [Marinovum algicola]	301	35957	15	10	5	3	5943	2	1	1	793.934	1585.85	2	1585.86	-0.0022	0	62.09	0.021	R	TVDTLLAGGSDPVITK	Q					Elution from: 64.545 to 64.545 period: 0 experiment: 1 cycles: 1 precIntensity: 86406.0 FinneganScanNumber: 5832 MStype: enumIsNormalMS rawFile: 16H146_5_120M.raw
18	gi|872593271	nitrate ABC transporter substrate-binding protein [Marinovum algicola]	301	35957	15	10	5	3	5944	2	1	1	793.935	1585.86	2	1585.86	-0.0006	0	67.16	0.0052	R	TVDTLLAGGSDPVITK	Q					Elution from: 64.482 to 64.482 period: 0 experiment: 1 cycles: 1 precIntensity: 51070.0 FinneganScanNumber: 5825 MStype: enumIsNormalMS rawFile: 16H146_5_120M.raw
18	gi|872593271	nitrate ABC transporter substrate-binding protein [Marinovum algicola]	301	35957	15	10	5	3	6387	1	1	1	847.903	1693.79	2	1693.79	-0.0002	0	92.13	1.5e-05	K	LTAGSNGALAEEDYQR	T					Elution from: 34.857 to 34.857 period: 0 experiment: 1 cycles: 1 precIntensity: 27937.0 FinneganScanNumber: 2678 MStype: enumIsNormalMS rawFile: 16H146_5_120M.raw
18	gi|872593271	nitrate ABC transporter substrate-binding protein [Marinovum algicola]	301	35957	15	10	5	3	6388	1	1	1	847.903	1693.79	2	1693.79	0.0004	0	96.59	5.7e-06	K	LTAGSNGALAEEDYQR	T					Elution from: 34.788 to 34.788 period: 0 experiment: 1 cycles: 1 precIntensity: 27681.0 FinneganScanNumber: 2672 MStype: enumIsNormalMS rawFile: 16H146_5_120M.raw
18	gi|872593271	nitrate ABC transporter substrate-binding protein [Marinovum algicola]	301	35957	15	10	5	3	6389	1	1	1	848.393	1694.77	2	1694.77	-0.0033	0	81.54	0.00014	K	LTAGSNGALAEEDYQR	T	Deamidated (NQ)	0.0000010000000000.0			Elution from: 36.952 to 36.952 period: 0 experiment: 1 cycles: 1 precIntensity: 19424.0 FinneganScanNumber: 2888 MStype: enumIsNormalMS rawFile: 16H146_5_120M.raw
18	gi|872593271	nitrate ABC transporter substrate-binding protein [Marinovum algicola]	301	35957	15	10	5	3	6390	1	1	1	848.394	1694.77	2	1694.77	-0.0005	0	87.43	3.6e-05	K	LTAGSNGALAEEDYQR	T	Deamidated (NQ)	0.0000010000000000.0			Elution from: 37.803 to 37.803 period: 0 experiment: 1 cycles: 1 precIntensity: 19873.0 FinneganScanNumber: 2978 MStype: enumIsNormalMS rawFile: 16H146_5_120M.raw
18	gi|872593271	nitrate ABC transporter substrate-binding protein [Marinovum algicola]	301	35957	15	10	5	3	6391	1	1	1	848.396	1694.78	2	1694.77	0.0021	0	90.52	1.7e-05	K	LTAGSNGALAEEDYQR	T	Deamidated (NQ)	0.0000010000000000.0			Elution from: 37.850 to 37.850 period: 0 experiment: 1 cycles: 1 precIntensity: 22422.0 FinneganScanNumber: 2983 MStype: enumIsNormalMS rawFile: 16H146_5_120M.raw
18	gi|872593271	nitrate ABC transporter substrate-binding protein [Marinovum algicola]	301	35957	15	10	5	3	6410	1	1	1	851.899	1701.78	2	1701.78	-0.0012	0	32.27	9.9	K	QPEGAWTSQITDAALN	-	Deamidated (NQ)	0.0000000010000000.0			Elution from: 82.535 to 82.535 period: 0 experiment: 1 cycles: 1 precIntensity: 19295.0 FinneganScanNumber: 7583 MStype: enumIsNormalMS rawFile: 16H146_5_120M.raw
19	gi|495831735	ATP synthase subunit alpha [Leisingera daeponensis]	295	54991	19	7	5	3	1062	1	0	0	362.229	722.444	2	722.444	-0.0002	0	35.93	0.42	K	APGIIPR	K					Elution from: 25.425 to 25.425 period: 0 experiment: 1 cycles: 1 precIntensity: 86739.0 FinneganScanNumber: 1732 MStype: enumIsNormalMS rawFile: 16H146_5_120M.raw
19	gi|495831735	ATP synthase subunit alpha [Leisingera daeponensis]	295	54991	19	7	5	3	1063	5	0	0	362.229	722.444	2	722.444	-0.0001	0	20.91	13	K	APGIIPR	K					Elution from: 35.483 to 35.483 period: 0 experiment: 1 cycles: 1 precIntensity: 12527.0 FinneganScanNumber: 2744 MStype: enumIsNormalMS rawFile: 16H146_5_120M.raw
19	gi|495831735	ATP synthase subunit alpha [Leisingera daeponensis]	295	54991	19	7	5	3	1064	1	0	0	362.229	722.444	2	722.444	0.0002	0	37.72	0.28	K	APGIIPR	K					Elution from: 25.363 to 25.363 period: 0 experiment: 1 cycles: 1 precIntensity: 87949.0 FinneganScanNumber: 1726 MStype: enumIsNormalMS rawFile: 16H146_5_120M.raw
19	gi|495831735	ATP synthase subunit alpha [Leisingera daeponensis]	295	54991	19	7	5	3	1065	1	0	0	362.229	722.444	2	722.444	0.0002	0	26.54	3.6	K	APGIIPR	K					Elution from: 27.642 to 27.642 period: 0 experiment: 1 cycles: 1 precIntensity: 72855.0 FinneganScanNumber: 1951 MStype: enumIsNormalMS rawFile: 16H146_5_120M.raw
19	gi|495831735	ATP synthase subunit alpha [Leisingera daeponensis]	295	54991	19	7	5	3	1066	1	0	0	362.229	722.444	2	722.444	0.0003	0	28.21	2.5	K	APGIIPR	K					Elution from: 27.513 to 27.513 period: 0 experiment: 1 cycles: 1 precIntensity: 99555.0 FinneganScanNumber: 1939 MStype: enumIsNormalMS rawFile: 16H146_5_120M.raw
19	gi|495831735	ATP synthase subunit alpha [Leisingera daeponensis]	295	54991	19	7	5	3	2622	7	0	0	529.786	1057.56	2	1057.56	-0.0023	0	31.57	24	K	SVDAMIPIGR	G					Elution from: 58.752 to 58.752 period: 0 experiment: 1 cycles: 1 precIntensity: 42400.0 FinneganScanNumber: 5210 MStype: enumIsNormalMS rawFile: 16H146_5_120M.raw
19	gi|495831735	ATP synthase subunit alpha [Leisingera daeponensis]	295	54991	19	7	5	3	2623	1	1	0	529.787	1057.56	2	1057.56	-0.0002	0	30.04	25	K	SVDAMIPIGR	G					Elution from: 58.877 to 58.877 period: 0 experiment: 1 cycles: 1 precIntensity: 32164.0 FinneganScanNumber: 5222 MStype: enumIsNormalMS rawFile: 16H146_5_120M.raw
19	gi|495831735	ATP synthase subunit alpha [Leisingera daeponensis]	295	54991	19	7	5	3	2624	2	0	0	529.787	1057.56	2	1057.56	0.0001	0	35.47	7.3	K	SVDAMIPIGR	G					Elution from: 53.653 to 53.653 period: 0 experiment: 1 cycles: 1 precIntensity: 122958.0 FinneganScanNumber: 4661 MStype: enumIsNormalMS rawFile: 16H146_5_120M.raw
19	gi|495831735	ATP synthase subunit alpha [Leisingera daeponensis]	295	54991	19	7	5	3	2625	6	0	0	529.787	1057.56	2	1057.56	0.0005	0	36.04	6.4	K	SVDAMIPIGR	G					Elution from: 53.700 to 53.700 period: 0 experiment: 1 cycles: 1 precIntensity: 140844.0 FinneganScanNumber: 4667 MStype: enumIsNormalMS rawFile: 16H146_5_120M.raw
19	gi|495831735	ATP synthase subunit alpha [Leisingera daeponensis]	295	54991	19	7	5	3	3300	1	0	0	592.319	1182.62	2	1182.62	-0.0009	0	65.06	0.0066	R	VVDGLGNPLDGK	G					Elution from: 49.578 to 49.578 period: 0 experiment: 1 cycles: 1 precIntensity: 244323.0 FinneganScanNumber: 4226 MStype: enumIsNormalMS rawFile: 16H146_5_120M.raw
19	gi|495831735	ATP synthase subunit alpha [Leisingera daeponensis]	295	54991	19	7	5	3	3301	1	0	0	592.319	1182.62	2	1182.62	-0.0007	0	64.92	0.0069	R	VVDGLGNPLDGK	G					Elution from: 49.545 to 49.545 period: 0 experiment: 1 cycles: 1 precIntensity: 59140.0 FinneganScanNumber: 4222 MStype: enumIsNormalMS rawFile: 16H146_5_120M.raw
19	gi|495831735	ATP synthase subunit alpha [Leisingera daeponensis]	295	54991	19	7	5	3	3521	1	0	0	607.36	1212.7	2	1212.71	-0.0029	0	67.86	0.0025	M	GIQAAEISAILK	D					Elution from: 82.598 to 82.598 period: 0 experiment: 1 cycles: 1 precIntensity: 33336.0 FinneganScanNumber: 7589 MStype: enumIsNormalMS rawFile: 16H146_5_120M.raw
19	gi|495831735	ATP synthase subunit alpha [Leisingera daeponensis]	295	54991	19	7	5	3	3522	1	0	0	607.361	1212.71	2	1212.71	-0.0007	0	57.55	0.029	M	GIQAAEISAILK	D					Elution from: 82.513 to 82.513 period: 0 experiment: 1 cycles: 1 precIntensity: 36380.0 FinneganScanNumber: 7581 MStype: enumIsNormalMS rawFile: 16H146_5_120M.raw
19	gi|495831735	ATP synthase subunit alpha [Leisingera daeponensis]	295	54991	19	7	5	3	6204	1	0	0	819.446	1636.88	2	1636.88	-0.0017	0	42.83	1.2	R	TNSIVDVPAGPELLGR	V					Elution from: 79.805 to 79.805 period: 0 experiment: 1 cycles: 1 precIntensity: 31560.0 FinneganScanNumber: 7334 MStype: enumIsNormalMS rawFile: 16H146_5_120M.raw
19	gi|495831735	ATP synthase subunit alpha [Leisingera daeponensis]	295	54991	19	7	5	3	6205	1	0	0	819.447	1636.88	2	1636.88	0.0001	0	88.07	3.4e-05	R	TNSIVDVPAGPELLGR	V					Elution from: 113.553 to 113.553 period: 0 experiment: 1 cycles: 1 precIntensity: 909092.0 FinneganScanNumber: 10397 MStype: enumIsNormalMS rawFile: 16H146_5_120M.raw
19	gi|495831735	ATP synthase subunit alpha [Leisingera daeponensis]	295	54991	19	7	5	3	6206	1	0	0	819.447	1636.88	2	1636.88	0.0008	0	58.91	0.029	R	TNSIVDVPAGPELLGR	V					Elution from: 79.873 to 79.873 period: 0 experiment: 1 cycles: 1 precIntensity: 63987.0 FinneganScanNumber: 7340 MStype: enumIsNormalMS rawFile: 16H146_5_120M.raw
19	gi|495831735	ATP synthase subunit alpha [Leisingera daeponensis]	295	54991	19	7	5	3	6207	1	0	0	819.447	1636.88	2	1636.88	0.0019	0	83.86	7.7e-05	R	TNSIVDVPAGPELLGR	V					Elution from: 113.610 to 113.610 period: 0 experiment: 1 cycles: 1 precIntensity: 1230041.0 FinneganScanNumber: 10403 MStype: enumIsNormalMS rawFile: 16H146_5_120M.raw
19	gi|495831735	ATP synthase subunit alpha [Leisingera daeponensis]	295	54991	19	7	5	3	6210	1	0	0	819.939	1637.86	2	1637.86	0.001	0	48.02	0.4	R	TNSIVDVPAGPELLGR	V	Deamidated (NQ)	0.0100000000000000.0			Elution from: 111.567 to 111.567 period: 0 experiment: 1 cycles: 1 precIntensity: 53213.0 FinneganScanNumber: 10184 MStype: enumIsNormalMS rawFile: 16H146_5_120M.raw
19	gi|495831735	ATP synthase subunit alpha [Leisingera daeponensis]	295	54991	19	7	5	3	6211	1	0	0	819.939	1637.86	2	1637.86	0.0015	0	46.11	0.63	R	TNSIVDVPAGPELLGR	V	Deamidated (NQ)	0.0100000000000000.0			Elution from: 111.498 to 111.498 period: 0 experiment: 1 cycles: 1 precIntensity: 103589.0 FinneganScanNumber: 10176 MStype: enumIsNormalMS rawFile: 16H146_5_120M.raw
20	gi|872571668	carbon monoxide dehydrogenase [Marinovum algicola]	284	27085	29	3	7	1	1072	1	1	1	364.209	726.403	2	726.402	0.0004	0	38.55	0.97	K	IGDPAVR	N					Elution from: 15.035 to 15.035 period: 0 experiment: 1 cycles: 1 precIntensity: 32088.0 FinneganScanNumber: 747 MStype: enumIsNormalMS rawFile: 16H146_5_120M.raw
20	gi|872571668	carbon monoxide dehydrogenase [Marinovum algicola]	284	27085	29	3	7	1	1073	1	1	1	364.209	726.403	2	726.402	0.0008	0	36.99	1.4	K	IGDPAVR	N					Elution from: 15.270 to 15.270 period: 0 experiment: 1 cycles: 1 precIntensity: 68021.0 FinneganScanNumber: 769 MStype: enumIsNormalMS rawFile: 16H146_5_120M.raw
20	gi|872571668	carbon monoxide dehydrogenase [Marinovum algicola]	284	27085	29	3	7	1	1521	1	1	1	417.709	833.403	2	833.403	-0.0002	0	29.99	27	K	FEQPASR	F					Elution from: 13.140 to 13.140 period: 0 experiment: 1 cycles: 1 precIntensity: 33512.0 FinneganScanNumber: 587 MStype: enumIsNormalMS rawFile: 16H146_5_120M.raw
20	gi|872571668	carbon monoxide dehydrogenase [Marinovum algicola]	284	27085	29	3	7	1	1522	1	1	1	417.709	833.404	2	833.403	0.0003	0	34.97	7.3	K	FEQPASR	F					Elution from: 13.175 to 13.175 period: 0 experiment: 1 cycles: 1 precIntensity: 39702.0 FinneganScanNumber: 590 MStype: enumIsNormalMS rawFile: 16H146_5_120M.raw
20	gi|872571668	carbon monoxide dehydrogenase [Marinovum algicola]	284	27085	29	3	7	1	2676	3	1	1	538.829	1075.64	2	1075.64	-0.0001	0	22.8	41	R	FPLVGVFVAK	Y					Elution from: 93.082 to 93.082 period: 0 experiment: 1 cycles: 1 precIntensity: 12507.0 FinneganScanNumber: 8518 MStype: enumIsNormalMS rawFile: 16H146_5_120M.raw
20	gi|872571668	carbon monoxide dehydrogenase [Marinovum algicola]	284	27085	29	3	7	1	3644	5	1	1	619.325	1236.64	2	1236.64	-0.0028	0	22.1	160	K	FPVPESSAYIK	F					Elution from: 84.053 to 84.053 period: 0 experiment: 1 cycles: 1 precIntensity: 21323.0 FinneganScanNumber: 7720 MStype: enumIsNormalMS rawFile: 16H146_5_120M.raw
20	gi|872571668	carbon monoxide dehydrogenase [Marinovum algicola]	284	27085	29	3	7	1	5339	1	1	1	724.375	1446.74	2	1446.74	-0.0001	0	57.02	0.067	R	ETAEGFPGLAGLASK	I					Elution from: 77.340 to 77.340 period: 0 experiment: 1 cycles: 1 precIntensity: 124127.0 FinneganScanNumber: 7109 MStype: enumIsNormalMS rawFile: 16H146_5_120M.raw
20	gi|872571668	carbon monoxide dehydrogenase [Marinovum algicola]	284	27085	29	3	7	1	5406	1	1	1	732.375	1462.74	2	1462.74	-0.0053	0	34.25	14	R	VGVGVTGASEEGVFR	W					Elution from: 86.102 to 86.102 period: 0 experiment: 1 cycles: 1 precIntensity: 14686.0 FinneganScanNumber: 7904 MStype: enumIsNormalMS rawFile: 16H146_5_120M.raw
20	gi|872571668	carbon monoxide dehydrogenase [Marinovum algicola]	284	27085	29	3	7	1	5407	1	1	1	732.375	1462.74	2	1462.74	-0.0053	0	45.2	1.1	R	VGVGVTGASEEGVFR	W					Elution from: 65.015 to 65.015 period: 0 experiment: 1 cycles: 1 precIntensity: 22991.0 FinneganScanNumber: 5881 MStype: enumIsNormalMS rawFile: 16H146_5_120M.raw
20	gi|872571668	carbon monoxide dehydrogenase [Marinovum algicola]	284	27085	29	3	7	1	5408	1	1	1	732.376	1462.74	2	1462.74	-0.0044	0	31.52	26	R	VGVGVTGASEEGVFR	W					Elution from: 81.803 to 81.803 period: 0 experiment: 1 cycles: 1 precIntensity: 17984.0 FinneganScanNumber: 7518 MStype: enumIsNormalMS rawFile: 16H146_5_120M.raw
20	gi|872571668	carbon monoxide dehydrogenase [Marinovum algicola]	284	27085	29	3	7	1	5409	1	1	1	732.377	1462.74	2	1462.74	-0.0029	0	21.02	300	R	VGVGVTGASEEGVFR	W					Elution from: 59.575 to 59.575 period: 0 experiment: 1 cycles: 1 precIntensity: 32476.0 FinneganScanNumber: 5297 MStype: enumIsNormalMS rawFile: 16H146_5_120M.raw
20	gi|872571668	carbon monoxide dehydrogenase [Marinovum algicola]	284	27085	29	3	7	1	5410	1	1	1	732.377	1462.74	2	1462.74	-0.0027	0	38.5	5.3	R	VGVGVTGASEEGVFR	W					Elution from: 59.740 to 59.740 period: 0 experiment: 1 cycles: 1 precIntensity: 37171.0 FinneganScanNumber: 5314 MStype: enumIsNormalMS rawFile: 16H146_5_120M.raw
20	gi|872571668	carbon monoxide dehydrogenase [Marinovum algicola]	284	27085	29	3	7	1	5411	2	1	1	732.377	1462.74	2	1462.74	-0.0026	0	29.62	40	R	VGVGVTGASEEGVFR	W					Elution from: 83.492 to 83.492 period: 0 experiment: 1 cycles: 1 precIntensity: 14453.0 FinneganScanNumber: 7672 MStype: enumIsNormalMS rawFile: 16H146_5_120M.raw
20	gi|872571668	carbon monoxide dehydrogenase [Marinovum algicola]	284	27085	29	3	7	1	5412	1	1	1	732.377	1462.74	2	1462.74	-0.0025	0	69.46	0.0041	R	VGVGVTGASEEGVFR	W					Elution from: 57.092 to 57.092 period: 0 experiment: 1 cycles: 1 precIntensity: 34519.0 FinneganScanNumber: 5032 MStype: enumIsNormalMS rawFile: 16H146_5_120M.raw
20	gi|872571668	carbon monoxide dehydrogenase [Marinovum algicola]	284	27085	29	3	7	1	5413	1	1	1	732.377	1462.74	2	1462.74	-0.0023	0	40.78	3	R	VGVGVTGASEEGVFR	W					Elution from: 54.953 to 54.953 period: 0 experiment: 1 cycles: 1 precIntensity: 34176.0 FinneganScanNumber: 4805 MStype: enumIsNormalMS rawFile: 16H146_5_120M.raw
20	gi|872571668	carbon monoxide dehydrogenase [Marinovum algicola]	284	27085	29	3	7	1	5414	1	1	1	732.377	1462.74	2	1462.74	-0.0022	0	22.52	200	R	VGVGVTGASEEGVFR	W					Elution from: 78.708 to 78.708 period: 0 experiment: 1 cycles: 1 precIntensity: 25560.0 FinneganScanNumber: 7233 MStype: enumIsNormalMS rawFile: 16H146_5_120M.raw
20	gi|872571668	carbon monoxide dehydrogenase [Marinovum algicola]	284	27085	29	3	7	1	5415	1	1	1	732.377	1462.74	2	1462.74	-0.002	0	28.27	54	R	VGVGVTGASEEGVFR	W					Elution from: 87.230 to 87.230 period: 0 experiment: 1 cycles: 1 precIntensity: 15094.0 FinneganScanNumber: 8003 MStype: enumIsNormalMS rawFile: 16H146_5_120M.raw
20	gi|872571668	carbon monoxide dehydrogenase [Marinovum algicola]	284	27085	29	3	7	1	5417	1	1	1	732.377	1462.74	2	1462.74	-0.0016	0	44.16	1.4	R	VGVGVTGASEEGVFR	W					Elution from: 90.320 to 90.320 period: 0 experiment: 1 cycles: 1 precIntensity: 12157.0 FinneganScanNumber: 8277 MStype: enumIsNormalMS rawFile: 16H146_5_120M.raw
20	gi|872571668	carbon monoxide dehydrogenase [Marinovum algicola]	284	27085	29	3	7	1	5418	1	1	1	732.377	1462.74	2	1462.74	-0.0014	0	46.75	0.77	R	VGVGVTGASEEGVFR	W					Elution from: 68.912 to 68.912 period: 0 experiment: 1 cycles: 1 precIntensity: 18710.0 FinneganScanNumber: 6282 MStype: enumIsNormalMS rawFile: 16H146_5_120M.raw
20	gi|872571668	carbon monoxide dehydrogenase [Marinovum algicola]	284	27085	29	3	7	1	5419	1	1	1	732.378	1462.74	2	1462.74	-0.0011	0	61.58	0.025	R	VGVGVTGASEEGVFR	W					Elution from: 55.008 to 55.008 period: 0 experiment: 1 cycles: 1 precIntensity: 63896.0 FinneganScanNumber: 4810 MStype: enumIsNormalMS rawFile: 16H146_5_120M.raw
20	gi|872571668	carbon monoxide dehydrogenase [Marinovum algicola]	284	27085	29	3	7	1	5420	1	1	1	732.378	1462.74	2	1462.74	-0.001	0	29.82	38	R	VGVGVTGASEEGVFR	W					Elution from: 69.688 to 69.688 period: 0 experiment: 1 cycles: 1 precIntensity: 15563.0 FinneganScanNumber: 6357 MStype: enumIsNormalMS rawFile: 16H146_5_120M.raw
20	gi|872571668	carbon monoxide dehydrogenase [Marinovum algicola]	284	27085	29	3	7	1	5421	1	1	1	732.378	1462.74	2	1462.74	-0.0009	0	62.63	0.02	R	VGVGVTGASEEGVFR	W					Elution from: 57.025 to 57.025 period: 0 experiment: 1 cycles: 1 precIntensity: 38407.0 FinneganScanNumber: 5026 MStype: enumIsNormalMS rawFile: 16H146_5_120M.raw
20	gi|872571668	carbon monoxide dehydrogenase [Marinovum algicola]	284	27085	29	3	7	1	5422	1	1	1	732.378	1462.74	2	1462.74	-0.0008	0	38.38	5.3	R	VGVGVTGASEEGVFR	W					Elution from: 99.850 to 99.850 period: 0 experiment: 1 cycles: 1 precIntensity: 6992.0 FinneganScanNumber: 9105 MStype: enumIsNormalMS rawFile: 16H146_5_120M.raw
20	gi|872571668	carbon monoxide dehydrogenase [Marinovum algicola]	284	27085	29	3	7	1	5423	2	1	1	732.378	1462.74	2	1462.74	-0.0008	0	24.24	140	R	VGVGVTGASEEGVFR	W					Elution from: 101.897 to 101.897 period: 0 experiment: 1 cycles: 1 precIntensity: 8089.0 FinneganScanNumber: 9281 MStype: enumIsNormalMS rawFile: 16H146_5_120M.raw
20	gi|872571668	carbon monoxide dehydrogenase [Marinovum algicola]	284	27085	29	3	7	1	5424	1	1	1	732.379	1462.74	2	1462.74	0.0011	0	30.42	28	R	VGVGVTGASEEGVFR	W					Elution from: 86.972 to 86.972 period: 0 experiment: 1 cycles: 1 precIntensity: 9179.0 FinneganScanNumber: 7980 MStype: enumIsNormalMS rawFile: 16H146_5_120M.raw
20	gi|872571668	carbon monoxide dehydrogenase [Marinovum algicola]	284	27085	29	3	7	1	5425	1	1	1	732.379	1462.74	2	1462.74	0.0012	0	42.32	1.8	R	VGVGVTGASEEGVFR	W					Elution from: 83.912 to 83.912 period: 0 experiment: 1 cycles: 1 precIntensity: 12347.0 FinneganScanNumber: 7708 MStype: enumIsNormalMS rawFile: 16H146_5_120M.raw
20	gi|872571668	carbon monoxide dehydrogenase [Marinovum algicola]	284	27085	29	3	7	1	5426	1	1	1	732.379	1462.74	2	1462.74	0.0014	0	34.49	11	R	VGVGVTGASEEGVFR	W					Elution from: 98.548 to 98.548 period: 0 experiment: 1 cycles: 1 precIntensity: 10695.0 FinneganScanNumber: 8993 MStype: enumIsNormalMS rawFile: 16H146_5_120M.raw
20	gi|872571668	carbon monoxide dehydrogenase [Marinovum algicola]	284	27085	29	3	7	1	5428	1	1	1	732.38	1462.75	2	1462.74	0.0049	0	44.33	1.4	R	VGVGVTGASEEGVFR	W					Elution from: 69.572 to 69.572 period: 0 experiment: 1 cycles: 1 precIntensity: 19683.0 FinneganScanNumber: 6345 MStype: enumIsNormalMS rawFile: 16H146_5_120M.raw
20	gi|872571668	carbon monoxide dehydrogenase [Marinovum algicola]	284	27085	29	3	7	1	8151	1	1	1	1056.82	3167.44	3	3167.44	-0.0039	0	38.75	3	R	GTIGGSLANNDPSACYPAAAMACGATIVTNSR	E					Elution from: 110.455 to 110.455 period: 0 experiment: 1 cycles: 1 precIntensity: 168361.0 FinneganScanNumber: 10067 MStype: enumIsNormalMS rawFile: 16H146_5_120M.raw
21	gi|872566723	aconitate hydratase [Marinovum algicola]	271	100416	10	1	7	1	2226	2	1	0	487.279	972.543	2	972.543	-0.0001	0	29.49	24	K	VVLENMLR	F					Elution from: 60.468 to 60.468 period: 0 experiment: 1 cycles: 1 precIntensity: 30938.0 FinneganScanNumber: 5393 MStype: enumIsNormalMS rawFile: 16H146_5_120M.raw
21	gi|872566723	aconitate hydratase [Marinovum algicola]	271	100416	10	1	7	1	2480	1	1	0	511.269	1020.52	2	1020.52	-0.0004	0	24.45	140	K	AVIAESFER	I					Elution from: 39.018 to 39.018 period: 0 experiment: 1 cycles: 1 precIntensity: 69736.0 FinneganScanNumber: 3102 MStype: enumIsNormalMS rawFile: 16H146_5_120M.raw
21	gi|872566723	aconitate hydratase [Marinovum algicola]	271	100416	10	1	7	1	3226	1	1	1	585.803	1169.59	2	1169.59	-0.0005	0	41.27	1.3	R	DGIVALGGDPEK	I					Elution from: 39.853 to 39.853 period: 0 experiment: 1 cycles: 1 precIntensity: 51224.0 FinneganScanNumber: 3192 MStype: enumIsNormalMS rawFile: 16H146_5_120M.raw
21	gi|872566723	aconitate hydratase [Marinovum algicola]	271	100416	10	1	7	1	3579	1	1	0	613.789	1225.56	2	1225.56	0.0005	0	67.83	0.0028	K	WGQSAFNNFR	V					Elution from: 61.690 to 61.690 period: 0 experiment: 1 cycles: 1 precIntensity: 80509.0 FinneganScanNumber: 5529 MStype: enumIsNormalMS rawFile: 16H146_5_120M.raw
21	gi|872566723	aconitate hydratase [Marinovum algicola]	271	100416	10	1	7	1	3580	1	1	0	613.789	1225.56	2	1225.56	0.0009	0	50.58	0.14	K	WGQSAFNNFR	V					Elution from: 61.650 to 61.650 period: 0 experiment: 1 cycles: 1 precIntensity: 62143.0 FinneganScanNumber: 5525 MStype: enumIsNormalMS rawFile: 16H146_5_120M.raw
21	gi|872566723	aconitate hydratase [Marinovum algicola]	271	100416	10	1	7	1	5433	1	1	1	734.862	1467.71	2	1467.71	-0.0006	1	31.55	19	R	FEDGKTVTTDDIK	A					Elution from: 27.673 to 27.673 period: 0 experiment: 1 cycles: 1 precIntensity: 20010.0 FinneganScanNumber: 1954 MStype: enumIsNormalMS rawFile: 16H146_5_120M.raw
21	gi|872566723	aconitate hydratase [Marinovum algicola]	271	100416	10	1	7	1	5434	4	1	1	734.862	1467.71	2	1467.71	-0.0001	1	30.12	27	R	FEDGKTVTTDDIK	A					Elution from: 27.715 to 27.715 period: 0 experiment: 1 cycles: 1 precIntensity: 30553.0 FinneganScanNumber: 1958 MStype: enumIsNormalMS rawFile: 16H146_5_120M.raw
21	gi|872566723	aconitate hydratase [Marinovum algicola]	271	100416	10	1	7	1	6428	1	1	1	853.455	1704.9	2	1704.9	-0.0016	0	29.93	32	K	LTGAMVEGTTGTDLVLK	V					Elution from: 102.262 to 102.262 period: 0 experiment: 1 cycles: 1 precIntensity: 12537.0 FinneganScanNumber: 9314 MStype: enumIsNormalMS rawFile: 16H146_5_120M.raw
21	gi|872566723	aconitate hydratase [Marinovum algicola]	271	100416	10	1	7	1	6683	1	1	1	897.455	1792.9	2	1792.9	0.0006	0	46.49	0.84	K	AVNDYDLVATSVLSGNR	N					Elution from: 84.545 to 84.545 period: 0 experiment: 1 cycles: 1 precIntensity: 15731.0 FinneganScanNumber: 7763 MStype: enumIsNormalMS rawFile: 16H146_5_120M.raw
21	gi|872566723	aconitate hydratase [Marinovum algicola]	271	100416	10	1	7	1	6684	1	1	1	897.458	1792.9	2	1792.9	0.0054	0	35.88	9.3	K	AVNDYDLVATSVLSGNR	N					Elution from: 84.732 to 84.732 period: 0 experiment: 1 cycles: 1 precIntensity: 23722.0 FinneganScanNumber: 7780 MStype: enumIsNormalMS rawFile: 16H146_5_120M.raw
22	gi|872581884	argininosuccinate synthase [Marinovum algicola]	261	45146	11	7	3	3	5822	1	1	1	782.401	1562.79	2	1562.79	-0.0058	0	60.93	0.028	K	SPATILTELNEYGR	K					Elution from: 93.572 to 93.572 period: 0 experiment: 1 cycles: 1 precIntensity: 12047.0 FinneganScanNumber: 8561 MStype: enumIsNormalMS rawFile: 16H146_5_120M.raw
22	gi|872581884	argininosuccinate synthase [Marinovum algicola]	261	45146	11	7	3	3	5823	1	1	1	782.404	1562.79	2	1562.79	-0.0014	0	91.5	2.5e-05	K	SPATILTELNEYGR	K					Elution from: 93.890 to 93.890 period: 0 experiment: 1 cycles: 1 precIntensity: 20640.0 FinneganScanNumber: 8590 MStype: enumIsNormalMS rawFile: 16H146_5_120M.raw
22	gi|872581884	argininosuccinate synthase [Marinovum algicola]	261	45146	11	7	3	3	5824	1	1	1	782.404	1562.79	2	1562.79	-0.001	0	71.92	0.0023	K	SPATILTELNEYGR	K					Elution from: 93.950 to 93.950 period: 0 experiment: 1 cycles: 1 precIntensity: 27576.0 FinneganScanNumber: 8595 MStype: enumIsNormalMS rawFile: 16H146_5_120M.raw
22	gi|872581884	argininosuccinate synthase [Marinovum algicola]	261	45146	11	7	3	3	5825	1	1	1	782.406	1562.8	2	1562.79	0.0026	0	53.48	0.14	K	SPATILTELNEYGR	K					Elution from: 93.532 to 93.532 period: 0 experiment: 1 cycles: 1 precIntensity: 11854.0 FinneganScanNumber: 8557 MStype: enumIsNormalMS rawFile: 16H146_5_120M.raw
22	gi|872581884	argininosuccinate synthase [Marinovum algicola]	261	45146	11	7	3	3	7033	1	1	1	948.445	1894.87	2	1894.88	-0.0022	0	33.93	9.8	K	VLEDPAEMAPDYVYQR	T					Elution from: 95.992 to 95.992 period: 0 experiment: 1 cycles: 1 precIntensity: 11536.0 FinneganScanNumber: 8772 MStype: enumIsNormalMS rawFile: 16H146_5_120M.raw
22	gi|872581884	argininosuccinate synthase [Marinovum algicola]	261	45146	11	7	3	3	7034	1	1	1	948.446	1894.88	2	1894.88	-0.0007	0	48.88	0.3	K	VLEDPAEMAPDYVYQR	T					Elution from: 98.645 to 98.645 period: 0 experiment: 1 cycles: 1 precIntensity: 10253.0 FinneganScanNumber: 9001 MStype: enumIsNormalMS rawFile: 16H146_5_120M.raw
22	gi|872581884	argininosuccinate synthase [Marinovum algicola]	261	45146	11	7	3	3	7035	1	1	1	948.446	1894.88	2	1894.88	-0.0001	0	58.6	0.032	K	VLEDPAEMAPDYVYQR	T					Elution from: 96.418 to 96.418 period: 0 experiment: 1 cycles: 1 precIntensity: 14412.0 FinneganScanNumber: 8808 MStype: enumIsNormalMS rawFile: 16H146_5_120M.raw
22	gi|872581884	argininosuccinate synthase [Marinovum algicola]	261	45146	11	7	3	3	7036	1	1	1	948.446	1894.88	2	1894.88	0	0	69.36	0.0027	K	VLEDPAEMAPDYVYQR	T					Elution from: 73.562 to 73.562 period: 0 experiment: 1 cycles: 1 precIntensity: 23781.0 FinneganScanNumber: 6745 MStype: enumIsNormalMS rawFile: 16H146_5_120M.raw
22	gi|872581884	argininosuccinate synthase [Marinovum algicola]	261	45146	11	7	3	3	7037	1	1	1	948.447	1894.88	2	1894.88	0.0023	0	46.95	0.5	K	VLEDPAEMAPDYVYQR	T					Elution from: 73.518 to 73.518 period: 0 experiment: 1 cycles: 1 precIntensity: 25144.0 FinneganScanNumber: 6741 MStype: enumIsNormalMS rawFile: 16H146_5_120M.raw
22	gi|872581884	argininosuccinate synthase [Marinovum algicola]	261	45146	11	7	3	3	7661	1	1	1	1125.52	2249.03	2	2249.04	-0.0035	0	57.84	0.039	R	TDDPVGGPDQPEYIEITFEK	G					Elution from: 112.312 to 112.312 period: 0 experiment: 1 cycles: 1 precIntensity: 43329.0 FinneganScanNumber: 10268 MStype: enumIsNormalMS rawFile: 16H146_5_120M.raw
22	gi|872581884	argininosuccinate synthase [Marinovum algicola]	261	45146	11	7	3	3	7662	1	1	1	1125.53	2249.04	2	2249.04	0.0004	0	99.75	2.7e-06	R	TDDPVGGPDQPEYIEITFEK	G					Elution from: 112.362 to 112.362 period: 0 experiment: 1 cycles: 1 precIntensity: 73128.0 FinneganScanNumber: 10274 MStype: enumIsNormalMS rawFile: 16H146_5_120M.raw
23	gi|872576393	dihydrolipoyl dehydrogenase [Marinovum algicola]	260	49457	7	3	4	2	3038	1	1	1	567.774	1133.53	2	1133.54	-0.0009	0	31.59	19	K	VGDDWQTSVK	G					Elution from: 30.775 to 30.775 period: 0 experiment: 1 cycles: 1 precIntensity: 138770.0 FinneganScanNumber: 2262 MStype: enumIsNormalMS rawFile: 16H146_5_120M.raw
23	gi|872576393	dihydrolipoyl dehydrogenase [Marinovum algicola]	260	49457	7	3	4	2	4888	1	1	1	690.87	1379.73	2	1379.73	-0.0033	0	48.7	0.34	K	FTLGAAVSSVEATK	T					Elution from: 114.605 to 114.605 period: 0 experiment: 1 cycles: 1 precIntensity: 40797.0 FinneganScanNumber: 10509 MStype: enumIsNormalMS rawFile: 16H146_5_120M.raw
23	gi|872576393	dihydrolipoyl dehydrogenase [Marinovum algicola]	260	49457	7	3	4	2	4889	1	1	1	690.872	1379.73	2	1379.73	-0.0002	0	45.58	0.68	K	FTLGAAVSSVEATK	T					Elution from: 114.642 to 114.642 period: 0 experiment: 1 cycles: 1 precIntensity: 78417.0 FinneganScanNumber: 10513 MStype: enumIsNormalMS rawFile: 16H146_5_120M.raw
23	gi|872576393	dihydrolipoyl dehydrogenase [Marinovum algicola]	260	49457	7	3	4	2	6465	1	1	0	860.425	1718.84	2	1718.83	0.0021	0	49.97	0.31	R	ETLGGTCLNIGCIPSK	A					Elution from: 69.217 to 69.217 period: 0 experiment: 1 cycles: 1 precIntensity: 29837.0 FinneganScanNumber: 6312 MStype: enumIsNormalMS rawFile: 16H146_5_120M.raw
23	gi|872576393	dihydrolipoyl dehydrogenase [Marinovum algicola]	260	49457	7	3	4	2	6466	1	1	0	860.425	1718.84	2	1718.83	0.0022	0	60.96	0.025	R	ETLGGTCLNIGCIPSK	A					Elution from: 69.238 to 69.238 period: 0 experiment: 1 cycles: 1 precIntensity: 54931.0 FinneganScanNumber: 6314 MStype: enumIsNormalMS rawFile: 16H146_5_120M.raw
23	gi|872576393	dihydrolipoyl dehydrogenase [Marinovum algicola]	260	49457	7	3	4	2	7714	1	1	1	1148.09	2294.17	2	2294.16	0.0029	0	119.03	4.7e-08	K	NIIIASGSEPSPVPGADVTVDEK	V					Elution from: 69.547 to 69.547 period: 0 experiment: 1 cycles: 1 precIntensity: 67595.0 FinneganScanNumber: 6343 MStype: enumIsNormalMS rawFile: 16H146_5_120M.raw
23	gi|872576393	dihydrolipoyl dehydrogenase [Marinovum algicola]	260	49457	7	3	4	2	7715	1	1	1	1148.09	2294.17	2	2294.16	0.0057	0	97.18	7.1e-06	K	NIIIASGSEPSPVPGADVTVDEK	V					Elution from: 69.502 to 69.502 period: 0 experiment: 1 cycles: 1 precIntensity: 41641.0 FinneganScanNumber: 6339 MStype: enumIsNormalMS rawFile: 16H146_5_120M.raw
24	gi|872571156	elongation factor Ts [Marinovum algicola]	257	30132	12	8	3	2	3073	1	1	1	571.237	1140.46	2	1140.46	-0.0013	0	35.91	0.57	R	EMTGAGMMDAK	K					Elution from: 28.557 to 28.557 period: 0 experiment: 1 cycles: 1 precIntensity: 36948.0 FinneganScanNumber: 2041 MStype: enumIsNormalMS rawFile: 16H146_5_120M.raw
24	gi|872571156	elongation factor Ts [Marinovum algicola]	257	30132	12	8	3	2	3155	1	1	1	579.235	1156.46	2	1156.46	0.0001	0	29.25	1.6	R	EMTGAGMMDAK	K	Oxidation (M)	0.00000002000.0			Elution from: 15.650 to 15.650 period: 0 experiment: 1 cycles: 1 precIntensity: 27687.0 FinneganScanNumber: 803 MStype: enumIsNormalMS rawFile: 16H146_5_120M.raw
24	gi|872571156	elongation factor Ts [Marinovum algicola]	257	30132	12	8	3	2	3156	1	1	1	579.235	1156.46	2	1156.46	0.0001	0	33.33	0.64	R	EMTGAGMMDAK	K	Oxidation (M)	0.00000002000.0			Elution from: 15.583 to 15.583 period: 0 experiment: 1 cycles: 1 precIntensity: 18057.0 FinneganScanNumber: 797 MStype: enumIsNormalMS rawFile: 16H146_5_120M.raw
24	gi|872571156	elongation factor Ts [Marinovum algicola]	257	30132	12	8	3	2	5229	1	1	1	713.337	1424.66	2	1424.66	-0.0011	0	58.83	0.028	K	NAEFQGMVSDISK	A					Elution from: 97.442 to 97.442 period: 0 experiment: 1 cycles: 1 precIntensity: 10900.0 FinneganScanNumber: 8897 MStype: enumIsNormalMS rawFile: 16H146_5_120M.raw
24	gi|872571156	elongation factor Ts [Marinovum algicola]	257	30132	12	8	3	2	5232	1	1	1	713.337	1424.66	2	1424.66	0	0	94.21	7.3e-06	K	NAEFQGMVSDISK	A					Elution from: 63.835 to 63.835 period: 0 experiment: 1 cycles: 1 precIntensity: 133868.0 FinneganScanNumber: 5757 MStype: enumIsNormalMS rawFile: 16H146_5_120M.raw
24	gi|872571156	elongation factor Ts [Marinovum algicola]	257	30132	12	8	3	2	5233	1	1	1	713.338	1424.66	2	1424.66	0.0011	0	40.28	2	K	NAEFQGMVSDISK	A					Elution from: 95.130 to 95.130 period: 0 experiment: 1 cycles: 1 precIntensity: 10193.0 FinneganScanNumber: 8695 MStype: enumIsNormalMS rawFile: 16H146_5_120M.raw
24	gi|872571156	elongation factor Ts [Marinovum algicola]	257	30132	12	8	3	2	5234	1	1	1	713.338	1424.66	2	1424.66	0.0019	0	65.9	0.0054	K	NAEFQGMVSDISK	A					Elution from: 99.960 to 99.960 period: 0 experiment: 1 cycles: 1 precIntensity: 8262.0 FinneganScanNumber: 9115 MStype: enumIsNormalMS rawFile: 16H146_5_120M.raw
24	gi|872571156	elongation factor Ts [Marinovum algicola]	257	30132	12	8	3	2	5235	1	1	1	713.339	1424.66	2	1424.66	0.0021	0	59.22	0.025	K	NAEFQGMVSDISK	A					Elution from: 92.918 to 92.918 period: 0 experiment: 1 cycles: 1 precIntensity: 11154.0 FinneganScanNumber: 8503 MStype: enumIsNormalMS rawFile: 16H146_5_120M.raw
24	gi|872571156	elongation factor Ts [Marinovum algicola]	257	30132	12	8	3	2	5317	1	1	1	721.334	1440.65	2	1440.66	-0.0015	0	71.15	0.0012	K	NAEFQGMVSDISK	A	Oxidation (M)	0.0000002000000.0			Elution from: 37.555 to 37.555 period: 0 experiment: 1 cycles: 1 precIntensity: 25609.0 FinneganScanNumber: 2953 MStype: enumIsNormalMS rawFile: 16H146_5_120M.raw
24	gi|872571156	elongation factor Ts [Marinovum algicola]	257	30132	12	8	3	2	5318	1	1	1	721.335	1440.66	2	1440.66	-0.0003	0	66.12	0.0039	K	NAEFQGMVSDISK	A	Oxidation (M)	0.0000002000000.0			Elution from: 37.490 to 37.490 period: 0 experiment: 1 cycles: 1 precIntensity: 33848.0 FinneganScanNumber: 2946 MStype: enumIsNormalMS rawFile: 16H146_5_120M.raw
24	gi|872571156	elongation factor Ts [Marinovum algicola]	257	30132	12	8	3	2	6495	1	1	1	865.452	1728.89	2	1728.89	0.0002	0	126.95	7e-09	K	AALGASSLDELAAADLGGK	T					Elution from: 89.162 to 89.162 period: 0 experiment: 1 cycles: 1 precIntensity: 126139.0 FinneganScanNumber: 8174 MStype: enumIsNormalMS rawFile: 16H146_5_120M.raw
24	gi|872571156	elongation factor Ts [Marinovum algicola]	257	30132	12	8	3	2	6496	1	1	1	865.452	1728.89	2	1728.89	0.0005	0	106.69	7.4e-07	K	AALGASSLDELAAADLGGK	T					Elution from: 89.090 to 89.090 period: 0 experiment: 1 cycles: 1 precIntensity: 122288.0 FinneganScanNumber: 8168 MStype: enumIsNormalMS rawFile: 16H146_5_120M.raw
25	gi|872596322	ABC transporter substrate-binding protein [Marinovum algicola]	251	44619	18	11	4	2	2472	5	1	1	510.279	1018.54	2	1018.54	-0.0007	0	31.33	24	R	VAGPAVSYGAK	L					Elution from: 22.620 to 22.620 period: 0 experiment: 1 cycles: 1 precIntensity: 69354.0 FinneganScanNumber: 1460 MStype: enumIsNormalMS rawFile: 16H146_5_120M.raw
25	gi|872596322	ABC transporter substrate-binding protein [Marinovum algicola]	251	44619	18	11	4	2	5652	1	1	1	758.823	1515.63	2	1515.63	-0.0022	0	72.39	0.00023	R	MDEQVGDFFDWK	V					Elution from: 100.425 to 100.425 period: 0 experiment: 1 cycles: 1 precIntensity: 17267.0 FinneganScanNumber: 9155 MStype: enumIsNormalMS rawFile: 16H146_5_120M.raw
25	gi|872596322	ABC transporter substrate-binding protein [Marinovum algicola]	251	44619	18	11	4	2	5653	1	1	1	758.824	1515.63	2	1515.63	0	0	42.71	0.25	R	MDEQVGDFFDWK	V					Elution from: 100.390 to 100.390 period: 0 experiment: 1 cycles: 1 precIntensity: 8396.0 FinneganScanNumber: 9152 MStype: enumIsNormalMS rawFile: 16H146_5_120M.raw
25	gi|872596322	ABC transporter substrate-binding protein [Marinovum algicola]	251	44619	18	11	4	2	5699	1	1	1	766.822	1531.63	2	1531.63	-0.0002	0	70.91	0.00025	R	MDEQVGDFFDWK	V	Oxidation (M)	0.200000000000.0			Elution from: 94.230 to 94.230 period: 0 experiment: 1 cycles: 1 precIntensity: 30819.0 FinneganScanNumber: 8619 MStype: enumIsNormalMS rawFile: 16H146_5_120M.raw
25	gi|872596322	ABC transporter substrate-binding protein [Marinovum algicola]	251	44619	18	11	4	2	5700	1	1	1	766.822	1531.63	2	1531.63	0.0001	0	49.05	0.039	R	MDEQVGDFFDWK	V	Oxidation (M)	0.200000000000.0			Elution from: 94.183 to 94.183 period: 0 experiment: 1 cycles: 1 precIntensity: 17412.0 FinneganScanNumber: 8615 MStype: enumIsNormalMS rawFile: 16H146_5_120M.raw
25	gi|872596322	ABC transporter substrate-binding protein [Marinovum algicola]	251	44619	18	11	4	2	6130	1	1	1	811.379	1620.74	2	1620.75	-0.0025	0	87.66	3.3e-05	K	VAEATDADFPMAIDR	S					Elution from: 68.537 to 68.537 period: 0 experiment: 1 cycles: 1 precIntensity: 25267.0 FinneganScanNumber: 6244 MStype: enumIsNormalMS rawFile: 16H146_5_120M.raw
25	gi|872596322	ABC transporter substrate-binding protein [Marinovum algicola]	251	44619	18	11	4	2	6132	1	1	1	811.379	1620.74	2	1620.75	-0.0022	0	47.83	0.31	K	VAEATDADFPMAIDR	S					Elution from: 97.358 to 97.358 period: 0 experiment: 1 cycles: 1 precIntensity: 10279.0 FinneganScanNumber: 8890 MStype: enumIsNormalMS rawFile: 16H146_5_120M.raw
25	gi|872596322	ABC transporter substrate-binding protein [Marinovum algicola]	251	44619	18	11	4	2	6133	1	1	1	811.38	1620.74	2	1620.75	-0.0006	0	57.74	0.033	K	VAEATDADFPMAIDR	S					Elution from: 94.835 to 94.835 period: 0 experiment: 1 cycles: 1 precIntensity: 14406.0 FinneganScanNumber: 8670 MStype: enumIsNormalMS rawFile: 16H146_5_120M.raw
25	gi|872596322	ABC transporter substrate-binding protein [Marinovum algicola]	251	44619	18	11	4	2	6134	1	1	1	811.38	1620.75	2	1620.75	-0.0003	0	71.1	0.0016	K	VAEATDADFPMAIDR	S					Elution from: 71.068 to 71.068 period: 0 experiment: 1 cycles: 1 precIntensity: 26669.0 FinneganScanNumber: 6500 MStype: enumIsNormalMS rawFile: 16H146_5_120M.raw
25	gi|872596322	ABC transporter substrate-binding protein [Marinovum algicola]	251	44619	18	11	4	2	6135	1	1	1	811.38	1620.75	2	1620.75	0.0003	0	83.8	8.8e-05	K	VAEATDADFPMAIDR	S					Elution from: 66.422 to 66.422 period: 0 experiment: 1 cycles: 1 precIntensity: 50374.0 FinneganScanNumber: 6023 MStype: enumIsNormalMS rawFile: 16H146_5_120M.raw
25	gi|872596322	ABC transporter substrate-binding protein [Marinovum algicola]	251	44619	18	11	4	2	6136	1	1	1	811.38	1620.75	2	1620.75	0.0005	0	55.27	0.063	K	VAEATDADFPMAIDR	S					Elution from: 89.428 to 89.428 period: 0 experiment: 1 cycles: 1 precIntensity: 15009.0 FinneganScanNumber: 8199 MStype: enumIsNormalMS rawFile: 16H146_5_120M.raw
25	gi|872596322	ABC transporter substrate-binding protein [Marinovum algicola]	251	44619	18	11	4	2	6137	1	1	1	811.38	1620.75	2	1620.75	0.0012	0	58.36	0.029	K	VAEATDADFPMAIDR	S					Elution from: 99.603 to 99.603 period: 0 experiment: 1 cycles: 1 precIntensity: 10992.0 FinneganScanNumber: 9084 MStype: enumIsNormalMS rawFile: 16H146_5_120M.raw
25	gi|872596322	ABC transporter substrate-binding protein [Marinovum algicola]	251	44619	18	11	4	2	6138	1	1	1	811.381	1620.75	2	1620.75	0.0013	0	93.63	8.6e-06	K	VAEATDADFPMAIDR	S					Elution from: 66.463 to 66.463 period: 0 experiment: 1 cycles: 1 precIntensity: 61947.0 FinneganScanNumber: 6028 MStype: enumIsNormalMS rawFile: 16H146_5_120M.raw
25	gi|872596322	ABC transporter substrate-binding protein [Marinovum algicola]	251	44619	18	11	4	2	6139	1	1	1	811.381	1620.75	2	1620.75	0.003	0	43.19	0.96	K	VAEATDADFPMAIDR	S					Elution from: 88.973 to 88.973 period: 0 experiment: 1 cycles: 1 precIntensity: 16035.0 FinneganScanNumber: 8158 MStype: enumIsNormalMS rawFile: 16H146_5_120M.raw
25	gi|872596322	ABC transporter substrate-binding protein [Marinovum algicola]	251	44619	18	11	4	2	6201	1	1	1	819.376	1636.74	2	1636.74	-0.0018	0	89.1	1.9e-05	K	VAEATDADFPMAIDR	S	Oxidation (M)	0.000000000020000.0			Elution from: 52.153 to 52.153 period: 0 experiment: 1 cycles: 1 precIntensity: 57589.0 FinneganScanNumber: 4501 MStype: enumIsNormalMS rawFile: 16H146_5_120M.raw
25	gi|872596322	ABC transporter substrate-binding protein [Marinovum algicola]	251	44619	18	11	4	2	6202	1	1	1	819.377	1636.74	2	1636.74	-0.0009	0	94.39	5.9e-06	K	VAEATDADFPMAIDR	S	Oxidation (M)	0.000000000020000.0			Elution from: 52.090 to 52.090 period: 0 experiment: 1 cycles: 1 precIntensity: 36061.0 FinneganScanNumber: 4494 MStype: enumIsNormalMS rawFile: 16H146_5_120M.raw
25	gi|872596322	ABC transporter substrate-binding protein [Marinovum algicola]	251	44619	18	11	4	2	8177	1	1	1	1150.55	3448.62	3	3448.62	0.0021	0	26.28	82	K	VVGSPCGPAGPCSGMPGGAGIVGFEQTEHPEIVAK	V					Elution from: 84.312 to 84.312 period: 0 experiment: 1 cycles: 1 precIntensity: 24982.0 FinneganScanNumber: 7743 MStype: enumIsNormalMS rawFile: 16H146_5_120M.raw
25	gi|872596322	ABC transporter substrate-binding protein [Marinovum algicola]	251	44619	18	11	4	2	8178	1	1	1	1150.88	3449.62	3	3449.61	0.0167	0	52.94	0.18	K	VVGSPCGPAGPCSGMPGGAGIVGFEQTEHPEIVAK	V	Deamidated (NQ)	0.00000000000000000000000001000000000.0			Elution from: 84.188 to 84.188 period: 0 experiment: 1 cycles: 1 precIntensity: 24907.0 FinneganScanNumber: 7732 MStype: enumIsNormalMS rawFile: 16H146_5_120M.raw
26	gi|872578969	DNA-directed RNA polymerase subunit beta [Marinovum algicola]	251	153761	8	3	5	2	2868	3	1	0	552.747	1103.48	2	1103.48	-0.001	0	28.82	8.2	K	GESPMTPEEK	L					Elution from: 15.432 to 15.432 period: 0 experiment: 1 cycles: 1 precIntensity: 29568.0 FinneganScanNumber: 784 MStype: enumIsNormalMS rawFile: 16H146_5_120M.raw
26	gi|872578969	DNA-directed RNA polymerase subunit beta [Marinovum algicola]	251	153761	8	3	5	2	3089	1	1	0	573.284	1144.55	2	1144.56	-0.0016	0	25.06	56	K	YGFIETPYR	V					Elution from: 60.512 to 60.512 period: 0 experiment: 1 cycles: 1 precIntensity: 61736.0 FinneganScanNumber: 5398 MStype: enumIsNormalMS rawFile: 16H146_5_120M.raw
26	gi|872578969	DNA-directed RNA polymerase subunit beta [Marinovum algicola]	251	153761	8	3	5	2	3090	2	1	0	573.285	1144.56	2	1144.56	0.0005	0	26.91	45	K	YGFIETPYR	V					Elution from: 60.442 to 60.442 period: 0 experiment: 1 cycles: 1 precIntensity: 48005.0 FinneganScanNumber: 5390 MStype: enumIsNormalMS rawFile: 16H146_5_120M.raw
26	gi|872578969	DNA-directed RNA polymerase subunit beta [Marinovum algicola]	251	153761	8	3	5	2	6225	1	1	1	820.946	1639.88	2	1639.88	-0.0001	0	38.01	3.5	R	SEAPLVGTGIEEIVAR	D					Elution from: 89.260 to 89.260 period: 0 experiment: 1 cycles: 1 precIntensity: 22292.0 FinneganScanNumber: 8183 MStype: enumIsNormalMS rawFile: 16H146_5_120M.raw
26	gi|872578969	DNA-directed RNA polymerase subunit beta [Marinovum algicola]	251	153761	8	3	5	2	6506	1	1	1	867.419	1732.82	2	1732.83	-0.0037	0	79.66	0.00032	R	ATDNLEVGDPGVDIYR	M					Elution from: 64.170 to 64.170 period: 0 experiment: 1 cycles: 1 precIntensity: 68701.0 FinneganScanNumber: 5791 MStype: enumIsNormalMS rawFile: 16H146_5_120M.raw
26	gi|872578969	DNA-directed RNA polymerase subunit beta [Marinovum algicola]	251	153761	8	3	5	2	6507	1	1	1	867.42	1732.83	2	1732.83	-0.0017	0	75.5	0.00076	R	ATDNLEVGDPGVDIYR	M					Elution from: 64.200 to 64.200 period: 0 experiment: 1 cycles: 1 precIntensity: 96991.0 FinneganScanNumber: 5795 MStype: enumIsNormalMS rawFile: 16H146_5_120M.raw
26	gi|872578969	DNA-directed RNA polymerase subunit beta [Marinovum algicola]	251	153761	8	3	5	2	7996	1	1	1	863.09	2586.25	3	2586.25	-0.0009	0	28	63	K	VGDTVQQGEVIADGPSTDMGELALGK	N					Elution from: 82.783 to 82.783 period: 0 experiment: 1 cycles: 1 precIntensity: 23600.0 FinneganScanNumber: 7606 MStype: enumIsNormalMS rawFile: 16H146_5_120M.raw
26	gi|872578969	DNA-directed RNA polymerase subunit beta [Marinovum algicola]	251	153761	8	3	5	2	7997	1	1	1	1294.13	2586.25	2	2586.25	0.0046	0	77.58	0.00069	K	VGDTVQQGEVIADGPSTDMGELALGK	N					Elution from: 106.927 to 106.927 period: 0 experiment: 1 cycles: 1 precIntensity: 51591.0 FinneganScanNumber: 9725 MStype: enumIsNormalMS rawFile: 16H146_5_120M.raw
27	gi|872579806	polyribonucleotide nucleotidyltransferase [Marinovum algicola]	246	77313	15	8	5	1	2998	2	1	1	564.798	1127.58	2	1127.58	-0.0008	0	22.84	97	K	IASPDGEAIQK	A					Elution from: 19.708 to 19.708 period: 0 experiment: 1 cycles: 1 precIntensity: 62753.0 FinneganScanNumber: 1183 MStype: enumIsNormalMS rawFile: 16H146_5_120M.raw
27	gi|872579806	polyribonucleotide nucleotidyltransferase [Marinovum algicola]	246	77313	15	8	5	1	3343	9	1	0	596.299	1190.58	2	1190.59	-0.0014	0	31.48	17	R	IETMQIPTDK	I	Oxidation (M)	0.0002000000.0			Elution from: 21.550 to 21.550 period: 0 experiment: 1 cycles: 1 precIntensity: 29733.0 FinneganScanNumber: 1358 MStype: enumIsNormalMS rawFile: 16H146_5_120M.raw
27	gi|872579806	polyribonucleotide nucleotidyltransferase [Marinovum algicola]	246	77313	15	8	5	1	3698	2	1	1	622.818	1243.62	2	1243.62	-0.0016	0	27.04	59	R	GIECETGLLPR	T					Elution from: 55.332 to 55.332 period: 0 experiment: 1 cycles: 1 precIntensity: 91291.0 FinneganScanNumber: 4847 MStype: enumIsNormalMS rawFile: 16H146_5_120M.raw
27	gi|872579806	polyribonucleotide nucleotidyltransferase [Marinovum algicola]	246	77313	15	8	5	1	3699	1	1	1	622.818	1243.62	2	1243.62	-0.001	0	42.26	1.3	R	GIECETGLLPR	T					Elution from: 55.222 to 55.222 period: 0 experiment: 1 cycles: 1 precIntensity: 52658.0 FinneganScanNumber: 4834 MStype: enumIsNormalMS rawFile: 16H146_5_120M.raw
27	gi|872579806	polyribonucleotide nucleotidyltransferase [Marinovum algicola]	246	77313	15	8	5	1	3700	1	1	1	622.819	1243.62	2	1243.62	-0.0003	0	31.86	15	R	GIECETGLLPR	T					Elution from: 55.285 to 55.285 period: 0 experiment: 1 cycles: 1 precIntensity: 79572.0 FinneganScanNumber: 4841 MStype: enumIsNormalMS rawFile: 16H146_5_120M.raw
27	gi|872579806	polyribonucleotide nucleotidyltransferase [Marinovum algicola]	246	77313	15	8	5	1	6432	1	1	0	855.408	1708.8	2	1708.8	0.0028	0	46.72	0.58	K	SMQWGEETLTLETGK	V					Elution from: 114.842 to 114.842 period: 0 experiment: 1 cycles: 1 precIntensity: 86281.0 FinneganScanNumber: 10535 MStype: enumIsNormalMS rawFile: 16H146_5_120M.raw
27	gi|872579806	polyribonucleotide nucleotidyltransferase [Marinovum algicola]	246	77313	15	8	5	1	6443	1	1	1	857.946	1713.88	2	1713.88	-0.0013	0	82.49	0.00019	K	LTEEQLEDANLGAALK	K					Elution from: 98.117 to 98.117 period: 0 experiment: 1 cycles: 1 precIntensity: 17887.0 FinneganScanNumber: 8956 MStype: enumIsNormalMS rawFile: 16H146_5_120M.raw
27	gi|872579806	polyribonucleotide nucleotidyltransferase [Marinovum algicola]	246	77313	15	8	5	1	6444	1	1	1	857.946	1713.88	2	1713.88	-0.0013	0	80.52	0.00028	K	LTEEQLEDANLGAALK	K					Elution from: 92.835 to 92.835 period: 0 experiment: 1 cycles: 1 precIntensity: 17118.0 FinneganScanNumber: 8496 MStype: enumIsNormalMS rawFile: 16H146_5_120M.raw
27	gi|872579806	polyribonucleotide nucleotidyltransferase [Marinovum algicola]	246	77313	15	8	5	1	6445	1	1	1	857.946	1713.88	2	1713.88	-0.0008	0	95.8	8.2e-06	K	LTEEQLEDANLGAALK	K					Elution from: 93.780 to 93.780 period: 0 experiment: 1 cycles: 1 precIntensity: 22741.0 FinneganScanNumber: 8580 MStype: enumIsNormalMS rawFile: 16H146_5_120M.raw
27	gi|872579806	polyribonucleotide nucleotidyltransferase [Marinovum algicola]	246	77313	15	8	5	1	6446	1	1	1	857.946	1713.88	2	1713.88	-0.0007	0	78.15	0.00048	K	LTEEQLEDANLGAALK	K					Elution from: 95.920 to 95.920 period: 0 experiment: 1 cycles: 1 precIntensity: 21438.0 FinneganScanNumber: 8766 MStype: enumIsNormalMS rawFile: 16H146_5_120M.raw
27	gi|872579806	polyribonucleotide nucleotidyltransferase [Marinovum algicola]	246	77313	15	8	5	1	6447	1	1	1	857.946	1713.88	2	1713.88	-0.0007	0	102.55	1.7e-06	K	LTEEQLEDANLGAALK	K					Elution from: 93.707 to 93.707 period: 0 experiment: 1 cycles: 1 precIntensity: 19228.0 FinneganScanNumber: 8573 MStype: enumIsNormalMS rawFile: 16H146_5_120M.raw
27	gi|872579806	polyribonucleotide nucleotidyltransferase [Marinovum algicola]	246	77313	15	8	5	1	6448	1	1	1	857.947	1713.88	2	1713.88	0.0002	0	76.61	0.00071	K	LTEEQLEDANLGAALK	K					Elution from: 95.790 to 95.790 period: 0 experiment: 1 cycles: 1 precIntensity: 18690.0 FinneganScanNumber: 8754 MStype: enumIsNormalMS rawFile: 16H146_5_120M.raw
27	gi|872579806	polyribonucleotide nucleotidyltransferase [Marinovum algicola]	246	77313	15	8	5	1	6449	1	1	1	857.948	1713.88	2	1713.88	0.0022	0	88.97	3.8e-05	K	LTEEQLEDANLGAALK	K					Elution from: 96.065 to 96.065 period: 0 experiment: 1 cycles: 1 precIntensity: 16684.0 FinneganScanNumber: 8778 MStype: enumIsNormalMS rawFile: 16H146_5_120M.raw
27	gi|872579806	polyribonucleotide nucleotidyltransferase [Marinovum algicola]	246	77313	15	8	5	1	6450	1	1	1	857.948	1713.88	2	1713.88	0.0022	0	60.31	0.028	K	LTEEQLEDANLGAALK	K					Elution from: 91.507 to 91.507 period: 0 experiment: 1 cycles: 1 precIntensity: 10032.0 FinneganScanNumber: 8381 MStype: enumIsNormalMS rawFile: 16H146_5_120M.raw
27	gi|872579806	polyribonucleotide nucleotidyltransferase [Marinovum algicola]	246	77313	15	8	5	1	6451	1	1	1	857.948	1713.88	2	1713.88	0.0037	0	55.56	0.095	K	LTEEQLEDANLGAALK	K					Elution from: 100.608 to 100.608 period: 0 experiment: 1 cycles: 1 precIntensity: 7851.0 FinneganScanNumber: 9170 MStype: enumIsNormalMS rawFile: 16H146_5_120M.raw
28	gi|497823359	amino acid ABC transporter substrate-binding protein [Oceanicola sp. S124]	245	35922	38	10	4	2	1713	1	0	0	440.766	879.517	2	879.518	-0.0004	0	32.97	3.5	K	EPLGPLVR	H					Elution from: 42.310 to 42.310 period: 0 experiment: 1 cycles: 1 precIntensity: 481148.0 FinneganScanNumber: 3454 MStype: enumIsNormalMS rawFile: 16H146_5_120M.raw
28	gi|497823359	amino acid ABC transporter substrate-binding protein [Oceanicola sp. S124]	245	35922	38	10	4	2	1718	1	0	0	440.766	879.518	2	879.518	-0.0002	0	28.5	9.9	K	EPLGPLVR	H					Elution from: 44.365 to 44.365 period: 0 experiment: 1 cycles: 1 precIntensity: 240574.0 FinneganScanNumber: 3676 MStype: enumIsNormalMS rawFile: 16H146_5_120M.raw
28	gi|497823359	amino acid ABC transporter substrate-binding protein [Oceanicola sp. S124]	245	35922	38	10	4	2	1721	1	0	0	440.766	879.518	2	879.518	-0.0002	0	35.54	2	K	EPLGPLVR	H					Elution from: 42.255 to 42.255 period: 0 experiment: 1 cycles: 1 precIntensity: 444956.0 FinneganScanNumber: 3448 MStype: enumIsNormalMS rawFile: 16H146_5_120M.raw
28	gi|497823359	amino acid ABC transporter substrate-binding protein [Oceanicola sp. S124]	245	35922	38	10	4	2	1729	1	0	0	440.766	879.518	2	879.518	0.0001	0	30.68	6	K	EPLGPLVR	H					Elution from: 44.418 to 44.418 period: 0 experiment: 1 cycles: 1 precIntensity: 228806.0 FinneganScanNumber: 3682 MStype: enumIsNormalMS rawFile: 16H146_5_120M.raw
28	gi|497823359	amino acid ABC transporter substrate-binding protein [Oceanicola sp. S124]	245	35922	38	10	4	2	2416	1	0	0	506.745	1011.48	2	1011.48	-0.0015	0	27.37	23	R	NTTWTFSR	D					Elution from: 64.470 to 64.470 period: 0 experiment: 1 cycles: 1 precIntensity: 86868.0 FinneganScanNumber: 5824 MStype: enumIsNormalMS rawFile: 16H146_5_120M.raw
28	gi|497823359	amino acid ABC transporter substrate-binding protein [Oceanicola sp. S124]	245	35922	38	10	4	2	2419	1	0	0	506.745	1011.48	2	1011.48	-0.0015	0	41.9	0.8	R	NTTWTFSR	D					Elution from: 45.750 to 45.750 period: 0 experiment: 1 cycles: 1 precIntensity: 522782.0 FinneganScanNumber: 3820 MStype: enumIsNormalMS rawFile: 16H146_5_120M.raw
28	gi|497823359	amino acid ABC transporter substrate-binding protein [Oceanicola sp. S124]	245	35922	38	10	4	2	2421	1	0	0	506.745	1011.48	2	1011.48	-0.0015	0	32.63	6.7	R	NTTWTFSR	D					Elution from: 51.957 to 51.957 period: 0 experiment: 1 cycles: 1 precIntensity: 133620.0 FinneganScanNumber: 4480 MStype: enumIsNormalMS rawFile: 16H146_5_120M.raw
28	gi|497823359	amino acid ABC transporter substrate-binding protein [Oceanicola sp. S124]	245	35922	38	10	4	2	2422	1	0	0	506.745	1011.48	2	1011.48	-0.0015	0	26.81	25	R	NTTWTFSR	D					Elution from: 52.010 to 52.010 period: 0 experiment: 1 cycles: 1 precIntensity: 149836.0 FinneganScanNumber: 4486 MStype: enumIsNormalMS rawFile: 16H146_5_120M.raw
28	gi|497823359	amino acid ABC transporter substrate-binding protein [Oceanicola sp. S124]	245	35922	38	10	4	2	2425	1	0	0	506.745	1011.48	2	1011.48	-0.0013	0	25.52	34	R	NTTWTFSR	D					Elution from: 49.925 to 49.925 period: 0 experiment: 1 cycles: 1 precIntensity: 237674.0 FinneganScanNumber: 4262 MStype: enumIsNormalMS rawFile: 16H146_5_120M.raw
28	gi|497823359	amino acid ABC transporter substrate-binding protein [Oceanicola sp. S124]	245	35922	38	10	4	2	2427	1	0	0	506.745	1011.48	2	1011.48	-0.0012	0	44.53	0.43	R	NTTWTFSR	D					Elution from: 47.793 to 47.793 period: 0 experiment: 1 cycles: 1 precIntensity: 318370.0 FinneganScanNumber: 4036 MStype: enumIsNormalMS rawFile: 16H146_5_120M.raw
28	gi|497823359	amino acid ABC transporter substrate-binding protein [Oceanicola sp. S124]	245	35922	38	10	4	2	2429	5	0	0	506.745	1011.48	2	1011.48	-0.0012	0	21.61	83	R	NTTWTFSR	D					Elution from: 62.395 to 62.395 period: 0 experiment: 1 cycles: 1 precIntensity: 183500.0 FinneganScanNumber: 5607 MStype: enumIsNormalMS rawFile: 16H146_5_120M.raw
28	gi|497823359	amino acid ABC transporter substrate-binding protein [Oceanicola sp. S124]	245	35922	38	10	4	2	2430	1	0	0	506.745	1011.48	2	1011.48	-0.0011	0	32.32	7.1	R	NTTWTFSR	D					Elution from: 66.647 to 66.647 period: 0 experiment: 1 cycles: 1 precIntensity: 101492.0 FinneganScanNumber: 6047 MStype: enumIsNormalMS rawFile: 16H146_5_120M.raw
28	gi|497823359	amino acid ABC transporter substrate-binding protein [Oceanicola sp. S124]	245	35922	38	10	4	2	2431	1	0	0	506.745	1011.48	2	1011.48	-0.0011	0	34.87	4	R	NTTWTFSR	D					Elution from: 49.875 to 49.875 period: 0 experiment: 1 cycles: 1 precIntensity: 213146.0 FinneganScanNumber: 4256 MStype: enumIsNormalMS rawFile: 16H146_5_120M.raw
28	gi|497823359	amino acid ABC transporter substrate-binding protein [Oceanicola sp. S124]	245	35922	38	10	4	2	2432	1	0	0	506.746	1011.48	2	1011.48	-0.0008	0	27.77	21	R	NTTWTFSR	D					Elution from: 47.835 to 47.835 period: 0 experiment: 1 cycles: 1 precIntensity: 321006.0 FinneganScanNumber: 4042 MStype: enumIsNormalMS rawFile: 16H146_5_120M.raw
28	gi|497823359	amino acid ABC transporter substrate-binding protein [Oceanicola sp. S124]	245	35922	38	10	4	2	2434	6	0	0	506.746	1011.48	2	1011.48	-0.0007	0	20.14	120	R	NTTWTFSR	D					Elution from: 54.062 to 54.062 period: 0 experiment: 1 cycles: 1 precIntensity: 140856.0 FinneganScanNumber: 4709 MStype: enumIsNormalMS rawFile: 16H146_5_120M.raw
28	gi|497823359	amino acid ABC transporter substrate-binding protein [Oceanicola sp. S124]	245	35922	38	10	4	2	2437	1	0	0	506.746	1011.48	2	1011.48	-0.0004	0	27.36	23	R	NTTWTFSR	D					Elution from: 45.705 to 45.705 period: 0 experiment: 1 cycles: 1 precIntensity: 508995.0 FinneganScanNumber: 3814 MStype: enumIsNormalMS rawFile: 16H146_5_120M.raw
28	gi|497823359	amino acid ABC transporter substrate-binding protein [Oceanicola sp. S124]	245	35922	38	10	4	2	2438	4	0	0	506.746	1011.48	2	1011.48	-0.0004	0	21.6	86	R	NTTWTFSR	D					Elution from: 58.247 to 58.247 period: 0 experiment: 1 cycles: 1 precIntensity: 102431.0 FinneganScanNumber: 5155 MStype: enumIsNormalMS rawFile: 16H146_5_120M.raw
28	gi|497823359	amino acid ABC transporter substrate-binding protein [Oceanicola sp. S124]	245	35922	38	10	4	2	2439	2	0	0	506.746	1011.48	2	1011.48	-0.0003	0	26.48	28	R	NTTWTFSR	D					Elution from: 60.373 to 60.373 period: 0 experiment: 1 cycles: 1 precIntensity: 71735.0 FinneganScanNumber: 5383 MStype: enumIsNormalMS rawFile: 16H146_5_120M.raw
28	gi|497823359	amino acid ABC transporter substrate-binding protein [Oceanicola sp. S124]	245	35922	38	10	4	2	2441	1	0	0	506.746	1011.48	2	1011.48	-0.0003	0	24.65	42	R	NTTWTFSR	D					Elution from: 66.578 to 66.578 period: 0 experiment: 1 cycles: 1 precIntensity: 129862.0 FinneganScanNumber: 6040 MStype: enumIsNormalMS rawFile: 16H146_5_120M.raw
28	gi|497823359	amino acid ABC transporter substrate-binding protein [Oceanicola sp. S124]	245	35922	38	10	4	2	2444	3	0	0	506.746	1011.48	2	1011.48	0.0002	0	20.16	120	R	NTTWTFSR	D					Elution from: 74.958 to 74.958 period: 0 experiment: 1 cycles: 1 precIntensity: 60732.0 FinneganScanNumber: 6882 MStype: enumIsNormalMS rawFile: 16H146_5_120M.raw
28	gi|497823359	amino acid ABC transporter substrate-binding protein [Oceanicola sp. S124]	245	35922	38	10	4	2	2446	1	0	0	506.746	1011.48	2	1011.48	0.0004	0	34.54	4.4	R	NTTWTFSR	D					Elution from: 60.323 to 60.323 period: 0 experiment: 1 cycles: 1 precIntensity: 115873.0 FinneganScanNumber: 5377 MStype: enumIsNormalMS rawFile: 16H146_5_120M.raw
28	gi|497823359	amino acid ABC transporter substrate-binding protein [Oceanicola sp. S124]	245	35922	38	10	4	2	2448	1	0	0	506.747	1011.48	2	1011.48	0.0015	0	33.47	3.9	R	NTTWTFSR	D					Elution from: 64.533 to 64.533 period: 0 experiment: 1 cycles: 1 precIntensity: 88387.0 FinneganScanNumber: 5831 MStype: enumIsNormalMS rawFile: 16H146_5_120M.raw
28	gi|497823359	amino acid ABC transporter substrate-binding protein [Oceanicola sp. S124]	245	35922	38	10	4	2	3304	1	0	0	592.783	1183.55	2	1183.55	-0.0001	0	74.39	0.00057	K	AGGNYGELFEK	N					Elution from: 64.242 to 64.242 period: 0 experiment: 1 cycles: 1 precIntensity: 172151.0 FinneganScanNumber: 5800 MStype: enumIsNormalMS rawFile: 16H146_5_120M.raw
28	gi|497823359	amino acid ABC transporter substrate-binding protein [Oceanicola sp. S124]	245	35922	38	10	4	2	3305	1	0	0	592.783	1183.55	2	1183.55	0.0001	0	51.15	0.12	K	AGGNYGELFEK	N					Elution from: 51.633 to 51.633 period: 0 experiment: 1 cycles: 1 precIntensity: 903527.0 FinneganScanNumber: 4444 MStype: enumIsNormalMS rawFile: 16H146_5_120M.raw
28	gi|497823359	amino acid ABC transporter substrate-binding protein [Oceanicola sp. S124]	245	35922	38	10	4	2	3306	1	0	0	592.783	1183.55	2	1183.55	0.0001	0	36.55	3.5	K	AGGNYGELFEK	N					Elution from: 76.288 to 76.288 period: 0 experiment: 1 cycles: 1 precIntensity: 116964.0 FinneganScanNumber: 7007 MStype: enumIsNormalMS rawFile: 16H146_5_120M.raw
28	gi|497823359	amino acid ABC transporter substrate-binding protein [Oceanicola sp. S124]	245	35922	38	10	4	2	3307	1	0	0	592.783	1183.55	2	1183.55	0.0002	0	52.33	0.091	K	AGGNYGELFEK	N					Elution from: 59.938 to 59.938 period: 0 experiment: 1 cycles: 1 precIntensity: 199349.0 FinneganScanNumber: 5335 MStype: enumIsNormalMS rawFile: 16H146_5_120M.raw
28	gi|497823359	amino acid ABC transporter substrate-binding protein [Oceanicola sp. S124]	245	35922	38	10	4	2	3308	1	0	0	592.783	1183.55	2	1183.55	0.0004	0	63.77	0.0066	K	AGGNYGELFEK	N					Elution from: 64.145 to 64.145 period: 0 experiment: 1 cycles: 1 precIntensity: 138189.0 FinneganScanNumber: 5788 MStype: enumIsNormalMS rawFile: 16H146_5_120M.raw
28	gi|497823359	amino acid ABC transporter substrate-binding protein [Oceanicola sp. S124]	245	35922	38	10	4	2	3309	1	0	0	592.783	1183.55	2	1183.55	0.0004	0	72.27	0.00093	K	AGGNYGELFEK	N					Elution from: 55.767 to 55.767 period: 0 experiment: 1 cycles: 1 precIntensity: 72972.0 FinneganScanNumber: 4895 MStype: enumIsNormalMS rawFile: 16H146_5_120M.raw
28	gi|497823359	amino acid ABC transporter substrate-binding protein [Oceanicola sp. S124]	245	35922	38	10	4	2	3310	1	0	0	592.783	1183.55	2	1183.55	0.0005	0	68.87	0.002	K	AGGNYGELFEK	N					Elution from: 55.813 to 55.813 period: 0 experiment: 1 cycles: 1 precIntensity: 303245.0 FinneganScanNumber: 4901 MStype: enumIsNormalMS rawFile: 16H146_5_120M.raw
28	gi|497823359	amino acid ABC transporter substrate-binding protein [Oceanicola sp. S124]	245	35922	38	10	4	2	3311	2	0	0	592.783	1183.55	2	1183.55	0.0005	0	25.34	46	K	AGGNYGELFEK	N					Elution from: 75.653 to 75.653 period: 0 experiment: 1 cycles: 1 precIntensity: 90888.0 FinneganScanNumber: 6947 MStype: enumIsNormalMS rawFile: 16H146_5_120M.raw
28	gi|497823359	amino acid ABC transporter substrate-binding protein [Oceanicola sp. S124]	245	35922	38	10	4	2	3312	1	0	0	592.783	1183.55	2	1183.55	0.0006	0	60.98	0.012	K	AGGNYGELFEK	N					Elution from: 53.740 to 53.740 period: 0 experiment: 1 cycles: 1 precIntensity: 660784.0 FinneganScanNumber: 4672 MStype: enumIsNormalMS rawFile: 16H146_5_120M.raw
28	gi|497823359	amino acid ABC transporter substrate-binding protein [Oceanicola sp. S124]	245	35922	38	10	4	2	3313	1	0	0	592.783	1183.55	2	1183.55	0.0008	0	66.26	0.0037	K	AGGNYGELFEK	N					Elution from: 60.000 to 60.000 period: 0 experiment: 1 cycles: 1 precIntensity: 209470.0 FinneganScanNumber: 5342 MStype: enumIsNormalMS rawFile: 16H146_5_120M.raw
28	gi|497823359	amino acid ABC transporter substrate-binding protein [Oceanicola sp. S124]	245	35922	38	10	4	2	3314	1	0	0	592.783	1183.55	2	1183.55	0.0009	0	54.49	0.057	K	AGGNYGELFEK	N					Elution from: 51.682 to 51.682 period: 0 experiment: 1 cycles: 1 precIntensity: 1099722.0 FinneganScanNumber: 4450 MStype: enumIsNormalMS rawFile: 16H146_5_120M.raw
28	gi|497823359	amino acid ABC transporter substrate-binding protein [Oceanicola sp. S124]	245	35922	38	10	4	2	3315	1	0	0	592.783	1183.55	2	1183.55	0.0012	0	56.84	0.033	K	AGGNYGELFEK	N					Elution from: 57.897 to 57.897 period: 0 experiment: 1 cycles: 1 precIntensity: 250971.0 FinneganScanNumber: 5116 MStype: enumIsNormalMS rawFile: 16H146_5_120M.raw
28	gi|497823359	amino acid ABC transporter substrate-binding protein [Oceanicola sp. S124]	245	35922	38	10	4	2	3316	1	0	0	592.783	1183.55	2	1183.55	0.0013	0	68.76	0.0022	K	AGGNYGELFEK	N					Elution from: 53.695 to 53.695 period: 0 experiment: 1 cycles: 1 precIntensity: 587938.0 FinneganScanNumber: 4666 MStype: enumIsNormalMS rawFile: 16H146_5_120M.raw
28	gi|497823359	amino acid ABC transporter substrate-binding protein [Oceanicola sp. S124]	245	35922	38	10	4	2	3317	1	0	0	592.783	1183.55	2	1183.55	0.0013	0	55.17	0.054	K	AGGNYGELFEK	N					Elution from: 62.283 to 62.283 period: 0 experiment: 1 cycles: 1 precIntensity: 156350.0 FinneganScanNumber: 5595 MStype: enumIsNormalMS rawFile: 16H146_5_120M.raw
28	gi|497823359	amino acid ABC transporter substrate-binding protein [Oceanicola sp. S124]	245	35922	38	10	4	2	7281	1	1	0	1007.55	2013.08	2	2013.08	0.0025	0	90.12	2.7e-05	R	AVAAAVLGDPTAVEFVPTTGK	T					Elution from: 113.068 to 113.068 period: 0 experiment: 1 cycles: 1 precIntensity: 62496.0 FinneganScanNumber: 10349 MStype: enumIsNormalMS rawFile: 16H146_5_120M.raw
28	gi|497823359	amino acid ABC transporter substrate-binding protein [Oceanicola sp. S124]	245	35922	38	10	4	2	7283	1	1	0	1007.55	2013.08	2	2013.08	0.0035	0	43.89	1.1	R	AVAAAVLGDPTAVEFVPTTGK	T					Elution from: 112.957 to 112.957 period: 0 experiment: 1 cycles: 1 precIntensity: 45189.0 FinneganScanNumber: 10338 MStype: enumIsNormalMS rawFile: 16H146_5_120M.raw
29	gi|872576383	succinate--CoA ligase subunit alpha [Marinovum algicola]	236	30763	12	4	5	2	1566	2	1	0	423.231	844.448	2	844.448	0.0001	0	20.99	220	K	MVGGVTPGK	G					Elution from: 15.740 to 15.740 period: 0 experiment: 1 cycles: 1 precIntensity: 115883.0 FinneganScanNumber: 811 MStype: enumIsNormalMS rawFile: 16H146_5_120M.raw
29	gi|872576383	succinate--CoA ligase subunit alpha [Marinovum algicola]	236	30763	12	4	5	2	2652	1	1	0	534.782	1067.55	2	1067.55	-0.0013	0	33.63	8.7	R	SGTLTYEAVK	Q					Elution from: 28.065 to 28.065 period: 0 experiment: 1 cycles: 1 precIntensity: 303457.0 FinneganScanNumber: 1993 MStype: enumIsNormalMS rawFile: 16H146_5_120M.raw
29	gi|872576383	succinate--CoA ligase subunit alpha [Marinovum algicola]	236	30763	12	4	5	2	2653	1	1	0	534.782	1067.55	2	1067.55	-0.0012	0	47.04	0.28	R	SGTLTYEAVK	Q					Elution from: 28.113 to 28.113 period: 0 experiment: 1 cycles: 1 precIntensity: 291941.0 FinneganScanNumber: 1999 MStype: enumIsNormalMS rawFile: 16H146_5_120M.raw
29	gi|872576383	succinate--CoA ligase subunit alpha [Marinovum algicola]	236	30763	12	4	5	2	3189	7	1	0	581.779	1161.54	2	1161.54	-0.0021	1	32.69	9.6	K	GGADDKIEAMR	S					Elution from: 22.062 to 22.062 period: 0 experiment: 1 cycles: 1 precIntensity: 28894.0 FinneganScanNumber: 1408 MStype: enumIsNormalMS rawFile: 16H146_5_120M.raw
29	gi|872576383	succinate--CoA ligase subunit alpha [Marinovum algicola]	236	30763	12	4	5	2	3190	1	1	0	581.779	1161.54	2	1161.54	-0.0009	1	31	14	K	GGADDKIEAMR	S					Elution from: 22.327 to 22.327 period: 0 experiment: 1 cycles: 1 precIntensity: 22117.0 FinneganScanNumber: 1432 MStype: enumIsNormalMS rawFile: 16H146_5_120M.raw
29	gi|872576383	succinate--CoA ligase subunit alpha [Marinovum algicola]	236	30763	12	4	5	2	3191	1	1	0	581.779	1161.54	2	1161.54	-0.0005	1	25.34	52	K	GGADDKIEAMR	S					Elution from: 22.403 to 22.403 period: 0 experiment: 1 cycles: 1 precIntensity: 9173.0 FinneganScanNumber: 1439 MStype: enumIsNormalMS rawFile: 16H146_5_120M.raw
29	gi|872576383	succinate--CoA ligase subunit alpha [Marinovum algicola]	236	30763	12	4	5	2	6352	1	1	1	842.96	1683.91	2	1683.9	0.0008	0	50.85	0.21	R	SAGIVVADSPATLGEAVK	E					Elution from: 66.170 to 66.170 period: 0 experiment: 1 cycles: 1 precIntensity: 76900.0 FinneganScanNumber: 5997 MStype: enumIsNormalMS rawFile: 16H146_5_120M.raw
29	gi|872576383	succinate--CoA ligase subunit alpha [Marinovum algicola]	236	30763	12	4	5	2	6353	1	1	1	842.96	1683.91	2	1683.9	0.0013	0	63.26	0.012	R	SAGIVVADSPATLGEAVK	E					Elution from: 66.125 to 66.125 period: 0 experiment: 1 cycles: 1 precIntensity: 79337.0 FinneganScanNumber: 5992 MStype: enumIsNormalMS rawFile: 16H146_5_120M.raw
29	gi|872576383	succinate--CoA ligase subunit alpha [Marinovum algicola]	236	30763	12	4	5	2	6433	1	1	1	856.429	1710.84	2	1710.84	-0.0001	0	59.12	0.04	R	LIGPNCPGVITPDACK	I					Elution from: 51.653 to 51.653 period: 0 experiment: 1 cycles: 1 precIntensity: 48355.0 FinneganScanNumber: 4447 MStype: enumIsNormalMS rawFile: 16H146_5_120M.raw
29	gi|872576383	succinate--CoA ligase subunit alpha [Marinovum algicola]	236	30763	12	4	5	2	6434	1	1	1	856.43	1710.84	2	1710.84	0.0012	0	72.52	0.0016	R	LIGPNCPGVITPDACK	I					Elution from: 51.693 to 51.693 period: 0 experiment: 1 cycles: 1 precIntensity: 56945.0 FinneganScanNumber: 4452 MStype: enumIsNormalMS rawFile: 16H146_5_120M.raw
29	gi|872576383	succinate--CoA ligase subunit alpha [Marinovum algicola]	236	30763	12	4	5	2	6435	1	1	1	856.43	1710.84	2	1710.84	0.0015	0	51.92	0.18	R	LIGPNCPGVITPDACK	I					Elution from: 53.772 to 53.772 period: 0 experiment: 1 cycles: 1 precIntensity: 35357.0 FinneganScanNumber: 4676 MStype: enumIsNormalMS rawFile: 16H146_5_120M.raw
29	gi|872576383	succinate--CoA ligase subunit alpha [Marinovum algicola]	236	30763	12	4	5	2	6436	1	1	1	856.43	1710.85	2	1710.84	0.002	0	67.75	0.0051	R	LIGPNCPGVITPDACK	I					Elution from: 53.972 to 53.972 period: 0 experiment: 1 cycles: 1 precIntensity: 25118.0 FinneganScanNumber: 4700 MStype: enumIsNormalMS rawFile: 16H146_5_120M.raw
30	gi|872563549	LacI family transcriptional regulator [Marinovum algicola]	230	31137	13	3	4	2	4354	1	1	1	657.362	1312.71	2	1312.71	-0.0001	0	52.07	0.13	K	AGQAIELSAQGIR	-					Elution from: 50.320 to 50.320 period: 0 experiment: 1 cycles: 1 precIntensity: 81658.0 FinneganScanNumber: 4304 MStype: enumIsNormalMS rawFile: 16H146_5_120M.raw
30	gi|872563549	LacI family transcriptional regulator [Marinovum algicola]	230	31137	13	3	4	2	4355	1	1	1	657.362	1312.71	2	1312.71	0.0001	0	63.62	0.0087	K	AGQAIELSAQGIR	-					Elution from: 50.253 to 50.253 period: 0 experiment: 1 cycles: 1 precIntensity: 113029.0 FinneganScanNumber: 4298 MStype: enumIsNormalMS rawFile: 16H146_5_120M.raw
30	gi|872563549	LacI family transcriptional regulator [Marinovum algicola]	230	31137	13	3	4	2	6757	1	1	1	908.436	1814.86	2	1814.85	0.0035	0	54.44	0.093	K	NGVDLAAQHTGANVEYR	A	Deamidated (NQ)	0.10000000000000000.0			Elution from: 42.487 to 42.487 period: 0 experiment: 1 cycles: 1 precIntensity: 60648.0 FinneganScanNumber: 3474 MStype: enumIsNormalMS rawFile: 16H146_5_120M.raw
30	gi|872563549	LacI family transcriptional regulator [Marinovum algicola]	230	31137	13	3	4	2	7373	1	1	1	1029.52	2057.02	2	2057.03	-0.0012	0	50.77	0.33	K	YGLMPGGNVPSGPNLVTQEK	A					Elution from: 74.885 to 74.885 period: 0 experiment: 1 cycles: 1 precIntensity: 41616.0 FinneganScanNumber: 6875 MStype: enumIsNormalMS rawFile: 16H146_5_120M.raw
30	gi|872563549	LacI family transcriptional regulator [Marinovum algicola]	230	31137	13	3	4	2	7374	1	1	1	1029.52	2057.03	2	2057.03	0	0	60.84	0.03	K	YGLMPGGNVPSGPNLVTQEK	A					Elution from: 74.950 to 74.950 period: 0 experiment: 1 cycles: 1 precIntensity: 63572.0 FinneganScanNumber: 6881 MStype: enumIsNormalMS rawFile: 16H146_5_120M.raw
30	gi|872563549	LacI family transcriptional regulator [Marinovum algicola]	230	31137	13	3	4	2	7375	1	1	1	1029.52	2057.03	2	2057.03	0.0007	0	27.61	61	K	YGLMPGGNVPSGPNLVTQEK	A					Elution from: 104.220 to 104.220 period: 0 experiment: 1 cycles: 1 precIntensity: 18700.0 FinneganScanNumber: 9483 MStype: enumIsNormalMS rawFile: 16H146_5_120M.raw
30	gi|872563549	LacI family transcriptional regulator [Marinovum algicola]	230	31137	13	3	4	2	7376	1	1	1	1029.52	2057.03	2	2057.03	0.0007	0	51.82	0.23	K	YGLMPGGNVPSGPNLVTQEK	A					Elution from: 106.522 to 106.522 period: 0 experiment: 1 cycles: 1 precIntensity: 91369.0 FinneganScanNumber: 9689 MStype: enumIsNormalMS rawFile: 16H146_5_120M.raw
30	gi|872563549	LacI family transcriptional regulator [Marinovum algicola]	230	31137	13	3	4	2	7377	1	1	1	1029.52	2057.03	2	2057.03	0.0014	0	30.12	37	K	YGLMPGGNVPSGPNLVTQEK	A					Elution from: 104.135 to 104.135 period: 0 experiment: 1 cycles: 1 precIntensity: 16558.0 FinneganScanNumber: 9476 MStype: enumIsNormalMS rawFile: 16H146_5_120M.raw
30	gi|872563549	LacI family transcriptional regulator [Marinovum algicola]	230	31137	13	3	4	2	7378	1	1	1	1029.52	2057.03	2	2057.03	0.0019	0	36.57	8.4	K	YGLMPGGNVPSGPNLVTQEK	A					Elution from: 104.458 to 104.458 period: 0 experiment: 1 cycles: 1 precIntensity: 27497.0 FinneganScanNumber: 9506 MStype: enumIsNormalMS rawFile: 16H146_5_120M.raw
30	gi|872563549	LacI family transcriptional regulator [Marinovum algicola]	230	31137	13	3	4	2	7379	1	1	1	1029.52	2057.03	2	2057.03	0.0033	0	31.55	24	K	YGLMPGGNVPSGPNLVTQEK	A					Elution from: 104.412 to 104.412 period: 0 experiment: 1 cycles: 1 precIntensity: 26036.0 FinneganScanNumber: 9502 MStype: enumIsNormalMS rawFile: 16H146_5_120M.raw
30	gi|872563549	LacI family transcriptional regulator [Marinovum algicola]	230	31137	13	3	4	2	7380	1	1	1	1029.52	2057.03	2	2057.03	0.0043	0	89.63	4.1e-05	K	YGLMPGGNVPSGPNLVTQEK	A					Elution from: 106.452 to 106.452 period: 0 experiment: 1 cycles: 1 precIntensity: 94765.0 FinneganScanNumber: 9683 MStype: enumIsNormalMS rawFile: 16H146_5_120M.raw
30	gi|872563549	LacI family transcriptional regulator [Marinovum algicola]	230	31137	13	3	4	2	7395	1	1	1	1037.52	2073.02	2	2073.02	0.0016	0	46.79	0.81	K	YGLMPGGNVPSGPNLVTQEK	A	Oxidation (M)	0.00020000000000000000.0			Elution from: 62.932 to 62.932 period: 0 experiment: 1 cycles: 1 precIntensity: 56718.0 FinneganScanNumber: 5663 MStype: enumIsNormalMS rawFile: 16H146_5_120M.raw
30	gi|872563549	LacI family transcriptional regulator [Marinovum algicola]	230	31137	13	3	4	2	8086	2	1	1	938.091	2811.25	3	2811.25	-0.004	0	22.01	99	R	CSGFEEGFGGSVEVLPTGNDPAEIESK	V					Elution from: 110.298 to 110.298 period: 0 experiment: 1 cycles: 1 precIntensity: 71787.0 FinneganScanNumber: 10051 MStype: enumIsNormalMS rawFile: 16H146_5_120M.raw
31	gi|872571728	peroxiredoxin OsmC [Marinovum algicola]	229	14614	17	2	5	2	1316	7	1	1	397.707	793.399	2	793.397	0.0024	0	28	24	K	DGGFAVTK	S					Elution from: 19.460 to 19.460 period: 0 experiment: 1 cycles: 1 precIntensity: 26150.0 FinneganScanNumber: 1158 MStype: enumIsNormalMS rawFile: 16H146_5_120M.raw
31	gi|872571728	peroxiredoxin OsmC [Marinovum algicola]	229	14614	17	2	5	2	3448	1	1	1	600.845	1199.67	2	1199.68	-0.0015	0	36.47	5.5	K	LLNAEITLDAK	L					Elution from: 105.887 to 105.887 period: 0 experiment: 1 cycles: 1 precIntensity: 33720.0 FinneganScanNumber: 9631 MStype: enumIsNormalMS rawFile: 16H146_5_120M.raw
31	gi|872571728	peroxiredoxin OsmC [Marinovum algicola]	229	14614	17	2	5	2	3449	1	1	1	600.845	1199.67	2	1199.68	-0.0013	0	57.85	0.041	K	LLNAEITLDAK	L					Elution from: 110.903 to 110.903 period: 0 experiment: 1 cycles: 1 precIntensity: 56540.0 FinneganScanNumber: 10112 MStype: enumIsNormalMS rawFile: 16H146_5_120M.raw
31	gi|872571728	peroxiredoxin OsmC [Marinovum algicola]	229	14614	17	2	5	2	3450	1	1	1	600.845	1199.68	2	1199.68	-0.0009	0	54.3	0.1	K	LLNAEITLDAK	L					Elution from: 106.162 to 106.162 period: 0 experiment: 1 cycles: 1 precIntensity: 30009.0 FinneganScanNumber: 9656 MStype: enumIsNormalMS rawFile: 16H146_5_120M.raw
31	gi|872571728	peroxiredoxin OsmC [Marinovum algicola]	229	14614	17	2	5	2	3451	1	1	1	600.846	1199.68	2	1199.68	0.0008	0	48.59	0.32	K	LLNAEITLDAK	L					Elution from: 110.530 to 110.530 period: 0 experiment: 1 cycles: 1 precIntensity: 35637.0 FinneganScanNumber: 10075 MStype: enumIsNormalMS rawFile: 16H146_5_120M.raw
31	gi|872571728	peroxiredoxin OsmC [Marinovum algicola]	229	14614	17	2	5	2	3452	1	1	1	600.846	1199.68	2	1199.68	0.001	0	30.95	19	K	LLNAEITLDAK	L					Elution from: 108.267 to 108.267 period: 0 experiment: 1 cycles: 1 precIntensity: 43261.0 FinneganScanNumber: 9849 MStype: enumIsNormalMS rawFile: 16H146_5_120M.raw
31	gi|872571728	peroxiredoxin OsmC [Marinovum algicola]	229	14614	17	2	5	2	3453	1	1	1	600.846	1199.68	2	1199.68	0.001	0	37.74	3.9	K	LLNAEITLDAK	L					Elution from: 108.447 to 108.447 period: 0 experiment: 1 cycles: 1 precIntensity: 45332.0 FinneganScanNumber: 9866 MStype: enumIsNormalMS rawFile: 16H146_5_120M.raw
31	gi|872571728	peroxiredoxin OsmC [Marinovum algicola]	229	14614	17	2	5	2	3487	1	1	1	605.275	1208.54	2	1208.54	-0.0022	0	30.48	13	K	VPGASEEDFMK	A					Elution from: 42.745 to 42.745 period: 0 experiment: 1 cycles: 1 precIntensity: 309804.0 FinneganScanNumber: 3502 MStype: enumIsNormalMS rawFile: 16H146_5_120M.raw
31	gi|872571728	peroxiredoxin OsmC [Marinovum algicola]	229	14614	17	2	5	2	3489	1	1	1	605.276	1208.54	2	1208.54	-0.0011	0	24.13	47	K	VPGASEEDFMK	A					Elution from: 44.855 to 44.855 period: 0 experiment: 1 cycles: 1 precIntensity: 82350.0 FinneganScanNumber: 3725 MStype: enumIsNormalMS rawFile: 16H146_5_120M.raw
31	gi|872571728	peroxiredoxin OsmC [Marinovum algicola]	229	14614	17	2	5	2	3490	1	1	1	605.276	1208.54	2	1208.54	-0.0008	0	20.3	110	K	VPGASEEDFMK	A					Elution from: 48.637 to 48.637 period: 0 experiment: 1 cycles: 1 precIntensity: 54534.0 FinneganScanNumber: 4127 MStype: enumIsNormalMS rawFile: 16H146_5_120M.raw
31	gi|872571728	peroxiredoxin OsmC [Marinovum algicola]	229	14614	17	2	5	2	3573	1	1	1	613.273	1224.53	2	1224.53	-0.0025	0	21.72	59	K	VPGASEEDFMK	A	Oxidation (M)	0.00000000020.0			Elution from: 28.565 to 28.565 period: 0 experiment: 1 cycles: 1 precIntensity: 24276.0 FinneganScanNumber: 2042 MStype: enumIsNormalMS rawFile: 16H146_5_120M.raw
31	gi|872571728	peroxiredoxin OsmC [Marinovum algicola]	229	14614	17	2	5	2	3575	1	1	1	613.274	1224.53	2	1224.53	0	0	56.4	0.018	K	VPGASEEDFMK	A	Oxidation (M)	0.00000000020.0			Elution from: 26.485 to 26.485 period: 0 experiment: 1 cycles: 1 precIntensity: 126484.0 FinneganScanNumber: 1838 MStype: enumIsNormalMS rawFile: 16H146_5_120M.raw
31	gi|872571728	peroxiredoxin OsmC [Marinovum algicola]	229	14614	17	2	5	2	3576	1	1	1	613.274	1224.53	2	1224.53	0.0012	0	50.4	0.076	K	VPGASEEDFMK	A	Oxidation (M)	0.00000000020.0			Elution from: 26.423 to 26.423 period: 0 experiment: 1 cycles: 1 precIntensity: 186427.0 FinneganScanNumber: 1832 MStype: enumIsNormalMS rawFile: 16H146_5_120M.raw
31	gi|872571728	peroxiredoxin OsmC [Marinovum algicola]	229	14614	17	2	5	2	5353	1	1	1	726.346	1450.68	2	1450.68	-0.0014	0	45.44	0.67	K	DGSGTVSTESGVLDK	V					Elution from: 29.135 to 29.135 period: 0 experiment: 1 cycles: 1 precIntensity: 20523.0 FinneganScanNumber: 2099 MStype: enumIsNormalMS rawFile: 16H146_5_120M.raw
31	gi|872571728	peroxiredoxin OsmC [Marinovum algicola]	229	14614	17	2	5	2	6722	2	1	1	602.973	1805.9	3	1805.9	-0.0028	1	31.04	31	K	GGLKDGSGTVSTESGVLDK	V					Elution from: 35.585 to 35.585 period: 0 experiment: 1 cycles: 1 precIntensity: 50020.0 FinneganScanNumber: 2754 MStype: enumIsNormalMS rawFile: 16H146_5_120M.raw
31	gi|872571728	peroxiredoxin OsmC [Marinovum algicola]	229	14614	17	2	5	2	6724	1	1	1	903.959	1805.9	2	1805.9	0.0025	1	38	5.9	K	GGLKDGSGTVSTESGVLDK	V					Elution from: 35.722 to 35.722 period: 0 experiment: 1 cycles: 1 precIntensity: 28554.0 FinneganScanNumber: 2768 MStype: enumIsNormalMS rawFile: 16H146_5_120M.raw
31	gi|872571728	peroxiredoxin OsmC [Marinovum algicola]	229	14614	17	2	5	2	6725	1	1	1	903.959	1805.9	2	1805.9	0.0028	1	41.64	2.5	K	GGLKDGSGTVSTESGVLDK	V					Elution from: 35.675 to 35.675 period: 0 experiment: 1 cycles: 1 precIntensity: 20456.0 FinneganScanNumber: 2763 MStype: enumIsNormalMS rawFile: 16H146_5_120M.raw
32	gi|872571256	C4-dicarboxylate ABC transporter substrate-binding protein [Marinovum algicola]	229	33197	9	3	4	2	3550	6	1	1	609.818	1217.62	2	1217.62	-0.0006	0	22.82	160	R	FEGQQLPMIR	A					Elution from: 59.850 to 59.850 period: 0 experiment: 1 cycles: 1 precIntensity: 43468.0 FinneganScanNumber: 5326 MStype: enumIsNormalMS rawFile: 16H146_5_120M.raw
32	gi|872571256	C4-dicarboxylate ABC transporter substrate-binding protein [Marinovum algicola]	229	33197	9	3	4	2	3551	1	1	1	609.818	1217.62	2	1217.62	-0.0003	0	46.17	0.75	R	FEGQQLPMIR	A					Elution from: 61.938 to 61.938 period: 0 experiment: 1 cycles: 1 precIntensity: 64542.0 FinneganScanNumber: 5556 MStype: enumIsNormalMS rawFile: 16H146_5_120M.raw
32	gi|872571256	C4-dicarboxylate ABC transporter substrate-binding protein [Marinovum algicola]	229	33197	9	3	4	2	3617	5	1	1	617.816	1233.62	2	1233.62	-0.0012	0	22.05	170	R	FEGQQLPMIR	A	Oxidation (M)	0.0000000200.0			Elution from: 50.693 to 50.693 period: 0 experiment: 1 cycles: 1 precIntensity: 43677.0 FinneganScanNumber: 4344 MStype: enumIsNormalMS rawFile: 16H146_5_120M.raw
32	gi|872571256	C4-dicarboxylate ABC transporter substrate-binding protein [Marinovum algicola]	229	33197	9	3	4	2	5048	1	1	1	700.86	1399.71	2	1399.71	-0.0002	0	48.64	0.32	R	VSVGAPGSGTEVNAR	T					Elution from: 26.430 to 26.430 period: 0 experiment: 1 cycles: 1 precIntensity: 90133.0 FinneganScanNumber: 1833 MStype: enumIsNormalMS rawFile: 16H146_5_120M.raw
32	gi|872571256	C4-dicarboxylate ABC transporter substrate-binding protein [Marinovum algicola]	229	33197	9	3	4	2	5049	1	1	1	700.86	1399.71	2	1399.71	0.0004	0	60.57	0.022	R	VSVGAPGSGTEVNAR	T					Elution from: 26.355 to 26.355 period: 0 experiment: 1 cycles: 1 precIntensity: 92567.0 FinneganScanNumber: 1826 MStype: enumIsNormalMS rawFile: 16H146_5_120M.raw
32	gi|872571256	C4-dicarboxylate ABC transporter substrate-binding protein [Marinovum algicola]	229	33197	9	3	4	2	5076	1	1	1	701.351	1400.69	2	1400.69	-0.0022	0	52.61	0.14	R	VSVGAPGSGTEVNAR	T	Deamidated (NQ)	0.000000000000100.0			Elution from: 24.338 to 24.338 period: 0 experiment: 1 cycles: 1 precIntensity: 41669.0 FinneganScanNumber: 1626 MStype: enumIsNormalMS rawFile: 16H146_5_120M.raw
32	gi|872571256	C4-dicarboxylate ABC transporter substrate-binding protein [Marinovum algicola]	229	33197	9	3	4	2	6405	1	1	1	567.946	1700.82	3	1700.82	-0.0003	0	26.65	62	R	YFEEAGATVPDHLRP	-					Elution from: 60.933 to 60.933 period: 0 experiment: 1 cycles: 1 precIntensity: 22376.0 FinneganScanNumber: 5443 MStype: enumIsNormalMS rawFile: 16H146_5_120M.raw
32	gi|872571256	C4-dicarboxylate ABC transporter substrate-binding protein [Marinovum algicola]	229	33197	9	3	4	2	7086	1	1	1	956.457	1910.9	2	1910.9	-0.0012	0	93.53	1.3e-05	R	TLLEANGISFDDFDAQR	L					Elution from: 94.055 to 94.055 period: 0 experiment: 1 cycles: 1 precIntensity: 14077.0 FinneganScanNumber: 8604 MStype: enumIsNormalMS rawFile: 16H146_5_120M.raw
32	gi|872571256	C4-dicarboxylate ABC transporter substrate-binding protein [Marinovum algicola]	229	33197	9	3	4	2	7087	1	1	1	956.457	1910.9	2	1910.9	-0.0011	0	95.85	7.5e-06	R	TLLEANGISFDDFDAQR	L					Elution from: 93.903 to 93.903 period: 0 experiment: 1 cycles: 1 precIntensity: 16287.0 FinneganScanNumber: 8591 MStype: enumIsNormalMS rawFile: 16H146_5_120M.raw
33	gi|757520	light-harvesting chlorophyll a-c binding protein [Amphidinium carterae]	229	19982	36	13	3	2	2228	8	0	1	487.748	973.481	2	973.483	-0.0017	0	34.32	9.1	K	LNSEIANGR	L	Deamidated (NQ)	0.000000100.0			Elution from: 18.977 to 18.977 period: 0 experiment: 1 cycles: 1 precIntensity: 53514.0 FinneganScanNumber: 1112 MStype: enumIsNormalMS rawFile: 16H146_5_120M.raw
33	gi|757520	light-harvesting chlorophyll a-c binding protein [Amphidinium carterae]	229	19982	36	13	3	2	2229	1	1	1	487.748	973.481	2	973.483	-0.0013	0	68.25	0.0034	K	LNSEIANGR	L	Deamidated (NQ)	0.000000100.0			Elution from: 15.143 to 15.143 period: 0 experiment: 1 cycles: 1 precIntensity: 77993.0 FinneganScanNumber: 757 MStype: enumIsNormalMS rawFile: 16H146_5_120M.raw
33	gi|757520	light-harvesting chlorophyll a-c binding protein [Amphidinium carterae]	229	19982	36	13	3	2	2230	3	0	1	487.748	973.482	2	973.483	-0.001	0	44.8	0.75	K	LNSEIANGR	L	Deamidated (NQ)	0.000000100.0			Elution from: 17.183 to 17.183 period: 0 experiment: 1 cycles: 1 precIntensity: 211349.0 FinneganScanNumber: 939 MStype: enumIsNormalMS rawFile: 16H146_5_120M.raw
33	gi|757520	light-harvesting chlorophyll a-c binding protein [Amphidinium carterae]	229	19982	36	13	3	2	2231	1	0	1	487.748	973.482	2	973.483	-0.0007	0	53.38	0.12	K	LNSEIANGR	L	Deamidated (NQ)	0.000000100.0			Elution from: 17.223 to 17.223 period: 0 experiment: 1 cycles: 1 precIntensity: 230234.0 FinneganScanNumber: 943 MStype: enumIsNormalMS rawFile: 16H146_5_120M.raw
33	gi|757520	light-harvesting chlorophyll a-c binding protein [Amphidinium carterae]	229	19982	36	13	3	2	2232	1	1	1	487.748	973.482	2	973.483	-0.0005	0	64.77	0.0088	K	LNSEIANGR	L	Deamidated (NQ)	0.000000100.0			Elution from: 15.082 to 15.082 period: 0 experiment: 1 cycles: 1 precIntensity: 106038.0 FinneganScanNumber: 751 MStype: enumIsNormalMS rawFile: 16H146_5_120M.raw
33	gi|757520	light-harvesting chlorophyll a-c binding protein [Amphidinium carterae]	229	19982	36	13	3	2	4337	1	1	1	656.832	1311.65	2	1311.65	-0.0038	0	25.94	52	K	FPGYLSPSMGLK	Y	Oxidation (M)	0.000000002000.0			Elution from: 63.167 to 63.167 period: 0 experiment: 1 cycles: 1 precIntensity: 68657.0 FinneganScanNumber: 5686 MStype: enumIsNormalMS rawFile: 16H146_5_120M.raw
33	gi|757520	light-harvesting chlorophyll a-c binding protein [Amphidinium carterae]	229	19982	36	13	3	2	4338	1	1	1	656.833	1311.65	2	1311.65	-0.001	0	27.25	49	K	FPGYLSPSMGLK	Y	Oxidation (M)	0.000000002000.0			Elution from: 75.340 to 75.340 period: 0 experiment: 1 cycles: 1 precIntensity: 21434.0 FinneganScanNumber: 6918 MStype: enumIsNormalMS rawFile: 16H146_5_120M.raw
33	gi|757520	light-harvesting chlorophyll a-c binding protein [Amphidinium carterae]	229	19982	36	13	3	2	4339	2	1	1	656.834	1311.65	2	1311.65	-0.0007	0	43.6	0.9	K	FPGYLSPSMGLK	Y	Oxidation (M)	0.000000002000.0			Elution from: 116.105 to 116.105 period: 0 experiment: 1 cycles: 1 precIntensity: 2309331.0 FinneganScanNumber: 10654 MStype: enumIsNormalMS rawFile: 16H146_5_120M.raw
33	gi|757520	light-harvesting chlorophyll a-c binding protein [Amphidinium carterae]	229	19982	36	13	3	2	4340	3	1	1	656.834	1311.65	2	1311.65	-0.0007	0	20.02	210	K	FPGYLSPSMGLK	Y	Oxidation (M)	0.000000002000.0			Elution from: 75.152 to 75.152 period: 0 experiment: 1 cycles: 1 precIntensity: 21814.0 FinneganScanNumber: 6901 MStype: enumIsNormalMS rawFile: 16H146_5_120M.raw
33	gi|757520	light-harvesting chlorophyll a-c binding protein [Amphidinium carterae]	229	19982	36	13	3	2	4341	1	1	1	656.834	1311.65	2	1311.65	-0.0006	0	22.21	120	K	FPGYLSPSMGLK	Y	Oxidation (M)	0.000000002000.0			Elution from: 74.663 to 74.663 period: 0 experiment: 1 cycles: 1 precIntensity: 39836.0 FinneganScanNumber: 6853 MStype: enumIsNormalMS rawFile: 16H146_5_120M.raw
33	gi|757520	light-harvesting chlorophyll a-c binding protein [Amphidinium carterae]	229	19982	36	13	3	2	4344	1	1	1	656.834	1311.65	2	1311.65	0.0002	0	39.65	2.1	K	FPGYLSPSMGLK	Y	Oxidation (M)	0.000000002000.0			Elution from: 72.517 to 72.517 period: 0 experiment: 1 cycles: 1 precIntensity: 502799.0 FinneganScanNumber: 6641 MStype: enumIsNormalMS rawFile: 16H146_5_120M.raw
33	gi|757520	light-harvesting chlorophyll a-c binding protein [Amphidinium carterae]	229	19982	36	13	3	2	4345	1	1	1	656.834	1311.65	2	1311.65	0.0003	0	43.7	0.84	K	FPGYLSPSMGLK	Y	Oxidation (M)	0.000000002000.0			Elution from: 116.063 to 116.063 period: 0 experiment: 1 cycles: 1 precIntensity: 573580.0 FinneganScanNumber: 10649 MStype: enumIsNormalMS rawFile: 16H146_5_120M.raw
33	gi|757520	light-harvesting chlorophyll a-c binding protein [Amphidinium carterae]	229	19982	36	13	3	2	4346	1	1	1	656.834	1311.65	2	1311.65	0.0004	0	40.15	1.9	K	FPGYLSPSMGLK	Y	Oxidation (M)	0.000000002000.0			Elution from: 70.502 to 70.502 period: 0 experiment: 1 cycles: 1 precIntensity: 1943206.0 FinneganScanNumber: 6443 MStype: enumIsNormalMS rawFile: 16H146_5_120M.raw
33	gi|757520	light-harvesting chlorophyll a-c binding protein [Amphidinium carterae]	229	19982	36	13	3	2	4348	1	1	1	656.834	1311.65	2	1311.65	0.0009	0	39.38	2.8	K	FPGYLSPSMGLK	Y	Oxidation (M)	0.000000002000.0			Elution from: 72.575 to 72.575 period: 0 experiment: 1 cycles: 1 precIntensity: 497440.0 FinneganScanNumber: 6647 MStype: enumIsNormalMS rawFile: 16H146_5_120M.raw
33	gi|757520	light-harvesting chlorophyll a-c binding protein [Amphidinium carterae]	229	19982	36	13	3	2	4349	1	1	1	656.835	1311.65	2	1311.65	0.0013	0	25.64	68	K	FPGYLSPSMGLK	Y	Oxidation (M)	0.000000002000.0			Elution from: 73.985 to 73.985 period: 0 experiment: 1 cycles: 1 precIntensity: 72872.0 FinneganScanNumber: 6786 MStype: enumIsNormalMS rawFile: 16H146_5_120M.raw
33	gi|757520	light-harvesting chlorophyll a-c binding protein [Amphidinium carterae]	229	19982	36	13	3	2	4350	3	1	1	656.835	1311.65	2	1311.65	0.0016	0	38.49	3.6	K	FPGYLSPSMGLK	Y	Oxidation (M)	0.000000002000.0			Elution from: 70.452 to 70.452 period: 0 experiment: 1 cycles: 1 precIntensity: 2834746.0 FinneganScanNumber: 6437 MStype: enumIsNormalMS rawFile: 16H146_5_120M.raw
33	gi|757520	light-harvesting chlorophyll a-c binding protein [Amphidinium carterae]	229	19982	36	13	3	2	6792	1	0	1	913.475	1824.93	2	1824.94	-0.0019	0	117.1	6.5e-08	R	IAMLATMGYITPELTGK	F	Oxidation (M)	0.00200000000000000.0			Elution from: 116.443 to 116.443 period: 0 experiment: 1 cycles: 1 precIntensity: 6749073.0 FinneganScanNumber: 10702 MStype: enumIsNormalMS rawFile: 16H146_5_120M.raw
33	gi|757520	light-harvesting chlorophyll a-c binding protein [Amphidinium carterae]	229	19982	36	13	3	2	6793	1	0	1	913.475	1824.94	2	1824.94	-0.0006	0	83.28	0.00015	R	IAMLATMGYITPELTGK	F	Oxidation (M)	0.00200000000000000.0			Elution from: 116.397 to 116.397 period: 0 experiment: 1 cycles: 1 precIntensity: 1543043.0 FinneganScanNumber: 10696 MStype: enumIsNormalMS rawFile: 16H146_5_120M.raw
33	gi|757520	light-harvesting chlorophyll a-c binding protein [Amphidinium carterae]	229	19982	36	13	3	2	6794	1	1	1	913.476	1824.94	2	1824.94	0.0014	0	35.65	8.7	R	IAMLATMGYITPELTGK	F	Oxidation (M)	0.00000020000000000.0			Elution from: 85.270 to 85.270 period: 0 experiment: 1 cycles: 1 precIntensity: 12653.0 FinneganScanNumber: 7829 MStype: enumIsNormalMS rawFile: 16H146_5_120M.raw
33	gi|757520	light-harvesting chlorophyll a-c binding protein [Amphidinium carterae]	229	19982	36	13	3	2	6840	2	0	1	921.469	1840.92	2	1840.93	-0.0072	0	70.87	0.0028	R	IAMLATMGYITPELTGK	F	2 Oxidation (M)	0.00200020000000000.0			Elution from: 72.652 to 72.652 period: 0 experiment: 1 cycles: 1 precIntensity: 42659.0 FinneganScanNumber: 6657 MStype: enumIsNormalMS rawFile: 16H146_5_120M.raw
33	gi|757520	light-harvesting chlorophyll a-c binding protein [Amphidinium carterae]	229	19982	36	13	3	2	6841	2	0	1	921.47	1840.93	2	1840.93	-0.0055	0	47.62	0.54	R	IAMLATMGYITPELTGK	F	2 Oxidation (M)	0.00200020000000000.0			Elution from: 72.533 to 72.533 period: 0 experiment: 1 cycles: 1 precIntensity: 38521.0 FinneganScanNumber: 6643 MStype: enumIsNormalMS rawFile: 16H146_5_120M.raw
33	gi|757520	light-harvesting chlorophyll a-c binding protein [Amphidinium carterae]	229	19982	36	13	3	2	6842	3	0	1	921.472	1840.93	2	1840.93	-0.0012	0	45.53	0.96	R	IAMLATMGYITPELTGK	F	2 Oxidation (M)	0.00200020000000000.0			Elution from: 118.122 to 118.122 period: 0 experiment: 1 cycles: 1 precIntensity: 10846.0 FinneganScanNumber: 10881 MStype: enumIsNormalMS rawFile: 16H146_5_120M.raw
33	gi|757520	light-harvesting chlorophyll a-c binding protein [Amphidinium carterae]	229	19982	36	13	3	2	6843	1	0	1	921.473	1840.93	2	1840.93	-0.0006	0	45.84	0.86	R	IAMLATMGYITPELTGK	F	2 Oxidation (M)	0.00200020000000000.0			Elution from: 102.973 to 102.973 period: 0 experiment: 1 cycles: 1 precIntensity: 15218.0 FinneganScanNumber: 9374 MStype: enumIsNormalMS rawFile: 16H146_5_120M.raw
33	gi|757520	light-harvesting chlorophyll a-c binding protein [Amphidinium carterae]	229	19982	36	13	3	2	6844	2	0	1	921.473	1840.93	2	1840.93	0.0004	0	78.9	0.00041	R	IAMLATMGYITPELTGK	F	2 Oxidation (M)	0.00200020000000000.0			Elution from: 100.780 to 100.780 period: 0 experiment: 1 cycles: 1 precIntensity: 18959.0 FinneganScanNumber: 9185 MStype: enumIsNormalMS rawFile: 16H146_5_120M.raw
33	gi|757520	light-harvesting chlorophyll a-c binding protein [Amphidinium carterae]	229	19982	36	13	3	2	6845	1	0	1	921.474	1840.93	2	1840.93	0.0019	0	68.63	0.0043	R	IAMLATMGYITPELTGK	F	2 Oxidation (M)	0.00200020000000000.0			Elution from: 102.915 to 102.915 period: 0 experiment: 1 cycles: 1 precIntensity: 17695.0 FinneganScanNumber: 9369 MStype: enumIsNormalMS rawFile: 16H146_5_120M.raw
33	gi|757520	light-harvesting chlorophyll a-c binding protein [Amphidinium carterae]	229	19982	36	13	3	2	6846	3	0	1	921.474	1840.93	2	1840.93	0.0021	0	85.61	8.8e-05	R	IAMLATMGYITPELTGK	F	2 Oxidation (M)	0.00200020000000000.0			Elution from: 115.960 to 115.960 period: 0 experiment: 1 cycles: 1 precIntensity: 2972887.0 FinneganScanNumber: 10636 MStype: enumIsNormalMS rawFile: 16H146_5_120M.raw
33	gi|757520	light-harvesting chlorophyll a-c binding protein [Amphidinium carterae]	229	19982	36	13	3	2	6847	2	0	1	921.474	1840.93	2	1840.93	0.0022	0	51.84	0.21	R	IAMLATMGYITPELTGK	F	2 Oxidation (M)	0.00200020000000000.0			Elution from: 84.170 to 84.170 period: 0 experiment: 1 cycles: 1 precIntensity: 383719.0 FinneganScanNumber: 7730 MStype: enumIsNormalMS rawFile: 16H146_5_120M.raw
33	gi|757520	light-harvesting chlorophyll a-c binding protein [Amphidinium carterae]	229	19982	36	13	3	2	6848	1	0	1	921.474	1840.93	2	1840.93	0.0022	0	45.52	0.9	R	IAMLATMGYITPELTGK	F	2 Oxidation (M)	0.00200020000000000.0			Elution from: 118.382 to 118.382 period: 0 experiment: 1 cycles: 1 precIntensity: 6985.0 FinneganScanNumber: 10902 MStype: enumIsNormalMS rawFile: 16H146_5_120M.raw
33	gi|757520	light-harvesting chlorophyll a-c binding protein [Amphidinium carterae]	229	19982	36	13	3	2	6849	2	0	1	921.474	1840.93	2	1840.93	0.0023	0	92.92	1.6e-05	R	IAMLATMGYITPELTGK	F	2 Oxidation (M)	0.00200020000000000.0			Elution from: 116.010 to 116.010 period: 0 experiment: 1 cycles: 1 precIntensity: 3605409.0 FinneganScanNumber: 10642 MStype: enumIsNormalMS rawFile: 16H146_5_120M.raw
33	gi|757520	light-harvesting chlorophyll a-c binding protein [Amphidinium carterae]	229	19982	36	13	3	2	6850	1	0	1	921.474	1840.93	2	1840.93	0.0024	0	83.23	0.00015	R	IAMLATMGYITPELTGK	F	2 Oxidation (M)	0.00200020000000000.0			Elution from: 82.097 to 82.097 period: 0 experiment: 1 cycles: 1 precIntensity: 64479.0 FinneganScanNumber: 7544 MStype: enumIsNormalMS rawFile: 16H146_5_120M.raw
33	gi|757520	light-harvesting chlorophyll a-c binding protein [Amphidinium carterae]	229	19982	36	13	3	2	6851	2	0	1	921.474	1840.93	2	1840.93	0.0026	0	70.63	0.003	R	IAMLATMGYITPELTGK	F	2 Oxidation (M)	0.00200020000000000.0			Elution from: 100.852 to 100.852 period: 0 experiment: 1 cycles: 1 precIntensity: 32670.0 FinneganScanNumber: 9191 MStype: enumIsNormalMS rawFile: 16H146_5_120M.raw
33	gi|757520	light-harvesting chlorophyll a-c binding protein [Amphidinium carterae]	229	19982	36	13	3	2	6852	2	0	1	921.474	1840.93	2	1840.93	0.0027	0	51.03	0.28	R	IAMLATMGYITPELTGK	F	2 Oxidation (M)	0.00200020000000000.0			Elution from: 84.232 to 84.232 period: 0 experiment: 1 cycles: 1 precIntensity: 490881.0 FinneganScanNumber: 7736 MStype: enumIsNormalMS rawFile: 16H146_5_120M.raw
33	gi|757520	light-harvesting chlorophyll a-c binding protein [Amphidinium carterae]	229	19982	36	13	3	2	6853	1	0	1	921.475	1840.93	2	1840.93	0.003	0	115.29	1e-07	R	IAMLATMGYITPELTGK	F	2 Oxidation (M)	0.00200020000000000.0			Elution from: 86.237 to 86.237 period: 0 experiment: 1 cycles: 1 precIntensity: 38228.0 FinneganScanNumber: 7916 MStype: enumIsNormalMS rawFile: 16H146_5_120M.raw
33	gi|757520	light-harvesting chlorophyll a-c binding protein [Amphidinium carterae]	229	19982	36	13	3	2	6854	4	0	1	921.475	1840.93	2	1840.93	0.0031	0	42.47	2	R	IAMLATMGYITPELTGK	F	2 Oxidation (M)	0.00200020000000000.0			Elution from: 88.420 to 88.420 period: 0 experiment: 1 cycles: 1 precIntensity: 47755.0 FinneganScanNumber: 8108 MStype: enumIsNormalMS rawFile: 16H146_5_120M.raw
33	gi|757520	light-harvesting chlorophyll a-c binding protein [Amphidinium carterae]	229	19982	36	13	3	2	6855	2	0	1	921.475	1840.93	2	1840.93	0.0031	0	69.82	0.0037	R	IAMLATMGYITPELTGK	F	2 Oxidation (M)	0.00200020000000000.0			Elution from: 82.067 to 82.067 period: 0 experiment: 1 cycles: 1 precIntensity: 36720.0 FinneganScanNumber: 7541 MStype: enumIsNormalMS rawFile: 16H146_5_120M.raw
33	gi|757520	light-harvesting chlorophyll a-c binding protein [Amphidinium carterae]	229	19982	36	13	3	2	6856	2	0	1	921.477	1840.94	2	1840.93	0.008	0	57.77	0.055	R	IAMLATMGYITPELTGK	F	2 Oxidation (M)	0.00200020000000000.0			Elution from: 98.225 to 98.225 period: 0 experiment: 1 cycles: 1 precIntensity: 10056.0 FinneganScanNumber: 8965 MStype: enumIsNormalMS rawFile: 16H146_5_120M.raw
34	gi|872571669	carbon monoxide dehydrogenase [Marinovum algicola]	226	85420	20	6	5	1	1690	2	1	1	439.23	876.445	2	876.445	-0.0002	0	22.95	140	R	VAVGDFNR	A					Elution from: 27.962 to 27.962 period: 0 experiment: 1 cycles: 1 precIntensity: 49033.0 FinneganScanNumber: 1982 MStype: enumIsNormalMS rawFile: 16H146_5_120M.raw
34	gi|872571669	carbon monoxide dehydrogenase [Marinovum algicola]	226	85420	20	6	5	1	2505	1	1	1	513.774	1025.53	2	1025.53	-0.0003	0	23.56	59	R	LVANPMEPR	V					Elution from: 30.345 to 30.345 period: 0 experiment: 1 cycles: 1 precIntensity: 42999.0 FinneganScanNumber: 2221 MStype: enumIsNormalMS rawFile: 16H146_5_120M.raw
34	gi|872571669	carbon monoxide dehydrogenase [Marinovum algicola]	226	85420	20	6	5	1	2506	1	1	1	513.774	1025.53	2	1025.53	0.0007	0	41.03	1.1	R	LVANPMEPR	V					Elution from: 30.397 to 30.397 period: 0 experiment: 1 cycles: 1 precIntensity: 37482.0 FinneganScanNumber: 2226 MStype: enumIsNormalMS rawFile: 16H146_5_120M.raw
34	gi|872571669	carbon monoxide dehydrogenase [Marinovum algicola]	226	85420	20	6	5	1	2507	1	1	1	513.774	1025.53	2	1025.53	0.0013	0	32.33	7.8	R	LVANPMEPR	V					Elution from: 32.622 to 32.622 period: 0 experiment: 1 cycles: 1 precIntensity: 25671.0 FinneganScanNumber: 2452 MStype: enumIsNormalMS rawFile: 16H146_5_120M.raw
34	gi|872571669	carbon monoxide dehydrogenase [Marinovum algicola]	226	85420	20	6	5	1	2549	1	1	1	521.771	1041.53	2	1041.53	-0.0003	0	23.07	66	R	LVANPMEPR	V	Oxidation (M)	0.000002000.0			Elution from: 17.253 to 17.253 period: 0 experiment: 1 cycles: 1 precIntensity: 32885.0 FinneganScanNumber: 946 MStype: enumIsNormalMS rawFile: 16H146_5_120M.raw
34	gi|872571669	carbon monoxide dehydrogenase [Marinovum algicola]	226	85420	20	6	5	1	2975	1	1	1	562.765	1123.52	2	1123.51	0.0006	0	27.43	29	K	DGQFSVAGTDK	S					Elution from: 22.363 to 22.363 period: 0 experiment: 1 cycles: 1 precIntensity: 12621.0 FinneganScanNumber: 1435 MStype: enumIsNormalMS rawFile: 16H146_5_120M.raw
34	gi|872571669	carbon monoxide dehydrogenase [Marinovum algicola]	226	85420	20	6	5	1	5358	1	1	0	726.878	1451.74	2	1451.74	-0.0004	0	36.46	5.7	K	AVFTNTVPVDAYR	G					Elution from: 59.770 to 59.770 period: 0 experiment: 1 cycles: 1 precIntensity: 76050.0 FinneganScanNumber: 5317 MStype: enumIsNormalMS rawFile: 16H146_5_120M.raw
34	gi|872571669	carbon monoxide dehydrogenase [Marinovum algicola]	226	85420	20	6	5	1	5359	1	1	0	726.878	1451.74	2	1451.74	0.0009	0	51.06	0.22	K	AVFTNTVPVDAYR	G					Elution from: 59.828 to 59.828 period: 0 experiment: 1 cycles: 1 precIntensity: 94337.0 FinneganScanNumber: 5323 MStype: enumIsNormalMS rawFile: 16H146_5_120M.raw
34	gi|872571669	carbon monoxide dehydrogenase [Marinovum algicola]	226	85420	20	6	5	1	6304	1	1	1	557.634	1669.88	3	1669.88	-0.0021	0	46	0.69	R	ITNIDTAAAAAMPGVVR	I					Elution from: 97.925 to 97.925 period: 0 experiment: 1 cycles: 1 precIntensity: 10376.0 FinneganScanNumber: 8939 MStype: enumIsNormalMS rawFile: 16H146_5_120M.raw
34	gi|872571669	carbon monoxide dehydrogenase [Marinovum algicola]	226	85420	20	6	5	1	6305	1	1	1	835.947	1669.88	2	1669.88	-0.0016	0	83.85	0.00013	R	ITNIDTAAAAAMPGVVR	I					Elution from: 100.365 to 100.365 period: 0 experiment: 1 cycles: 1 precIntensity: 11045.0 FinneganScanNumber: 9150 MStype: enumIsNormalMS rawFile: 16H146_5_120M.raw
34	gi|872571669	carbon monoxide dehydrogenase [Marinovum algicola]	226	85420	20	6	5	1	6306	1	1	1	557.634	1669.88	3	1669.88	-0.0014	0	63.72	0.013	R	ITNIDTAAAAAMPGVVR	I					Elution from: 98.738 to 98.738 period: 0 experiment: 1 cycles: 1 precIntensity: 16355.0 FinneganScanNumber: 9009 MStype: enumIsNormalMS rawFile: 16H146_5_120M.raw
34	gi|872571669	carbon monoxide dehydrogenase [Marinovum algicola]	226	85420	20	6	5	1	6307	1	1	1	835.948	1669.88	2	1669.88	-0.0013	0	77.96	0.00048	R	ITNIDTAAAAAMPGVVR	I					Elution from: 72.015 to 72.015 period: 0 experiment: 1 cycles: 1 precIntensity: 24643.0 FinneganScanNumber: 6591 MStype: enumIsNormalMS rawFile: 16H146_5_120M.raw
34	gi|872571669	carbon monoxide dehydrogenase [Marinovum algicola]	226	85420	20	6	5	1	6308	1	1	1	835.948	1669.88	2	1669.88	-0.0007	0	56.31	0.071	R	ITNIDTAAAAAMPGVVR	I					Elution from: 98.325 to 98.325 period: 0 experiment: 1 cycles: 1 precIntensity: 15056.0 FinneganScanNumber: 8974 MStype: enumIsNormalMS rawFile: 16H146_5_120M.raw
34	gi|872571669	carbon monoxide dehydrogenase [Marinovum algicola]	226	85420	20	6	5	1	6309	1	1	1	835.949	1669.88	2	1669.88	0.001	0	53.05	0.15	R	ITNIDTAAAAAMPGVVR	I					Elution from: 98.213 to 98.213 period: 0 experiment: 1 cycles: 1 precIntensity: 12082.0 FinneganScanNumber: 8964 MStype: enumIsNormalMS rawFile: 16H146_5_120M.raw
34	gi|872571669	carbon monoxide dehydrogenase [Marinovum algicola]	226	85420	20	6	5	1	6310	1	1	1	835.949	1669.88	2	1669.88	0.0011	0	71.45	0.0021	R	ITNIDTAAAAAMPGVVR	I					Elution from: 72.108 to 72.108 period: 0 experiment: 1 cycles: 1 precIntensity: 64970.0 FinneganScanNumber: 6601 MStype: enumIsNormalMS rawFile: 16H146_5_120M.raw
34	gi|872571669	carbon monoxide dehydrogenase [Marinovum algicola]	226	85420	20	6	5	1	6311	1	1	1	835.949	1669.88	2	1669.88	0.0012	0	69.56	0.0032	R	ITNIDTAAAAAMPGVVR	I					Elution from: 72.060 to 72.060 period: 0 experiment: 1 cycles: 1 precIntensity: 43696.0 FinneganScanNumber: 6596 MStype: enumIsNormalMS rawFile: 16H146_5_120M.raw
34	gi|872571669	carbon monoxide dehydrogenase [Marinovum algicola]	226	85420	20	6	5	1	6312	1	1	1	835.949	1669.88	2	1669.88	0.0016	0	60.03	0.028	R	ITNIDTAAAAAMPGVVR	I					Elution from: 100.412 to 100.412 period: 0 experiment: 1 cycles: 1 precIntensity: 17685.0 FinneganScanNumber: 9154 MStype: enumIsNormalMS rawFile: 16H146_5_120M.raw
34	gi|872571669	carbon monoxide dehydrogenase [Marinovum algicola]	226	85420	20	6	5	1	6313	1	1	1	835.949	1669.88	2	1669.88	0.002	0	56.27	0.066	R	ITNIDTAAAAAMPGVVR	I					Elution from: 102.545 to 102.545 period: 0 experiment: 1 cycles: 1 precIntensity: 21542.0 FinneganScanNumber: 9338 MStype: enumIsNormalMS rawFile: 16H146_5_120M.raw
34	gi|872571669	carbon monoxide dehydrogenase [Marinovum algicola]	226	85420	20	6	5	1	6314	1	1	1	835.95	1669.88	2	1669.88	0.0028	0	49.81	0.3	R	ITNIDTAAAAAMPGVVR	I					Elution from: 102.500 to 102.500 period: 0 experiment: 1 cycles: 1 precIntensity: 9024.0 FinneganScanNumber: 9334 MStype: enumIsNormalMS rawFile: 16H146_5_120M.raw
34	gi|872571669	carbon monoxide dehydrogenase [Marinovum algicola]	226	85420	20	6	5	1	6372	1	1	1	843.946	1685.88	2	1685.88	0.0008	0	27.29	74	R	ITNIDTAAAAAMPGVVR	I	Oxidation (M)	0.00000000000200000.0			Elution from: 50.727 to 50.727 period: 0 experiment: 1 cycles: 1 precIntensity: 41938.0 FinneganScanNumber: 4348 MStype: enumIsNormalMS rawFile: 16H146_5_120M.raw
35	gi|914673159	amino acid ABC transporter substrate-binding protein [Roseovarius tolerans]	224	36052	25	1	4	1	1713	1	0	0	440.766	879.517	2	879.518	-0.0004	0	32.97	3.5	K	EPLGPLVR	H					Elution from: 42.310 to 42.310 period: 0 experiment: 1 cycles: 1 precIntensity: 481148.0 FinneganScanNumber: 3454 MStype: enumIsNormalMS rawFile: 16H146_5_120M.raw
35	gi|914673159	amino acid ABC transporter substrate-binding protein [Roseovarius tolerans]	224	36052	25	1	4	1	1718	1	0	0	440.766	879.518	2	879.518	-0.0002	0	28.5	9.9	K	EPLGPLVR	H					Elution from: 44.365 to 44.365 period: 0 experiment: 1 cycles: 1 precIntensity: 240574.0 FinneganScanNumber: 3676 MStype: enumIsNormalMS rawFile: 16H146_5_120M.raw
35	gi|914673159	amino acid ABC transporter substrate-binding protein [Roseovarius tolerans]	224	36052	25	1	4	1	1721	1	0	0	440.766	879.518	2	879.518	-0.0002	0	35.54	2	K	EPLGPLVR	H					Elution from: 42.255 to 42.255 period: 0 experiment: 1 cycles: 1 precIntensity: 444956.0 FinneganScanNumber: 3448 MStype: enumIsNormalMS rawFile: 16H146_5_120M.raw
35	gi|914673159	amino acid ABC transporter substrate-binding protein [Roseovarius tolerans]	224	36052	25	1	4	1	1729	1	0	0	440.766	879.518	2	879.518	0.0001	0	30.68	6	K	EPLGPLVR	H					Elution from: 44.418 to 44.418 period: 0 experiment: 1 cycles: 1 precIntensity: 228806.0 FinneganScanNumber: 3682 MStype: enumIsNormalMS rawFile: 16H146_5_120M.raw
35	gi|914673159	amino acid ABC transporter substrate-binding protein [Roseovarius tolerans]	224	36052	25	1	4	1	2416	1	0	0	506.745	1011.48	2	1011.48	-0.0015	0	27.37	23	R	NTTWTFSR	D					Elution from: 64.470 to 64.470 period: 0 experiment: 1 cycles: 1 precIntensity: 86868.0 FinneganScanNumber: 5824 MStype: enumIsNormalMS rawFile: 16H146_5_120M.raw
35	gi|914673159	amino acid ABC transporter substrate-binding protein [Roseovarius tolerans]	224	36052	25	1	4	1	2419	1	0	0	506.745	1011.48	2	1011.48	-0.0015	0	41.9	0.8	R	NTTWTFSR	D					Elution from: 45.750 to 45.750 period: 0 experiment: 1 cycles: 1 precIntensity: 522782.0 FinneganScanNumber: 3820 MStype: enumIsNormalMS rawFile: 16H146_5_120M.raw
35	gi|914673159	amino acid ABC transporter substrate-binding protein [Roseovarius tolerans]	224	36052	25	1	4	1	2421	1	0	0	506.745	1011.48	2	1011.48	-0.0015	0	32.63	6.7	R	NTTWTFSR	D					Elution from: 51.957 to 51.957 period: 0 experiment: 1 cycles: 1 precIntensity: 133620.0 FinneganScanNumber: 4480 MStype: enumIsNormalMS rawFile: 16H146_5_120M.raw
35	gi|914673159	amino acid ABC transporter substrate-binding protein [Roseovarius tolerans]	224	36052	25	1	4	1	2422	1	0	0	506.745	1011.48	2	1011.48	-0.0015	0	26.81	25	R	NTTWTFSR	D					Elution from: 52.010 to 52.010 period: 0 experiment: 1 cycles: 1 precIntensity: 149836.0 FinneganScanNumber: 4486 MStype: enumIsNormalMS rawFile: 16H146_5_120M.raw
35	gi|914673159	amino acid ABC transporter substrate-binding protein [Roseovarius tolerans]	224	36052	25	1	4	1	2425	1	0	0	506.745	1011.48	2	1011.48	-0.0013	0	25.52	34	R	NTTWTFSR	D					Elution from: 49.925 to 49.925 period: 0 experiment: 1 cycles: 1 precIntensity: 237674.0 FinneganScanNumber: 4262 MStype: enumIsNormalMS rawFile: 16H146_5_120M.raw
35	gi|914673159	amino acid ABC transporter substrate-binding protein [Roseovarius tolerans]	224	36052	25	1	4	1	2427	1	0	0	506.745	1011.48	2	1011.48	-0.0012	0	44.53	0.43	R	NTTWTFSR	D					Elution from: 47.793 to 47.793 period: 0 experiment: 1 cycles: 1 precIntensity: 318370.0 FinneganScanNumber: 4036 MStype: enumIsNormalMS rawFile: 16H146_5_120M.raw
35	gi|914673159	amino acid ABC transporter substrate-binding protein [Roseovarius tolerans]	224	36052	25	1	4	1	2429	5	0	0	506.745	1011.48	2	1011.48	-0.0012	0	21.61	83	R	NTTWTFSR	D					Elution from: 62.395 to 62.395 period: 0 experiment: 1 cycles: 1 precIntensity: 183500.0 FinneganScanNumber: 5607 MStype: enumIsNormalMS rawFile: 16H146_5_120M.raw
35	gi|914673159	amino acid ABC transporter substrate-binding protein [Roseovarius tolerans]	224	36052	25	1	4	1	2430	1	0	0	506.745	1011.48	2	1011.48	-0.0011	0	32.32	7.1	R	NTTWTFSR	D					Elution from: 66.647 to 66.647 period: 0 experiment: 1 cycles: 1 precIntensity: 101492.0 FinneganScanNumber: 6047 MStype: enumIsNormalMS rawFile: 16H146_5_120M.raw
35	gi|914673159	amino acid ABC transporter substrate-binding protein [Roseovarius tolerans]	224	36052	25	1	4	1	2431	1	0	0	506.745	1011.48	2	1011.48	-0.0011	0	34.87	4	R	NTTWTFSR	D					Elution from: 49.875 to 49.875 period: 0 experiment: 1 cycles: 1 precIntensity: 213146.0 FinneganScanNumber: 4256 MStype: enumIsNormalMS rawFile: 16H146_5_120M.raw
35	gi|914673159	amino acid ABC transporter substrate-binding protein [Roseovarius tolerans]	224	36052	25	1	4	1	2432	1	0	0	506.746	1011.48	2	1011.48	-0.0008	0	27.77	21	R	NTTWTFSR	D					Elution from: 47.835 to 47.835 period: 0 experiment: 1 cycles: 1 precIntensity: 321006.0 FinneganScanNumber: 4042 MStype: enumIsNormalMS rawFile: 16H146_5_120M.raw
35	gi|914673159	amino acid ABC transporter substrate-binding protein [Roseovarius tolerans]	224	36052	25	1	4	1	2434	6	0	0	506.746	1011.48	2	1011.48	-0.0007	0	20.14	120	R	NTTWTFSR	D					Elution from: 54.062 to 54.062 period: 0 experiment: 1 cycles: 1 precIntensity: 140856.0 FinneganScanNumber: 4709 MStype: enumIsNormalMS rawFile: 16H146_5_120M.raw
35	gi|914673159	amino acid ABC transporter substrate-binding protein [Roseovarius tolerans]	224	36052	25	1	4	1	2437	1	0	0	506.746	1011.48	2	1011.48	-0.0004	0	27.36	23	R	NTTWTFSR	D					Elution from: 45.705 to 45.705 period: 0 experiment: 1 cycles: 1 precIntensity: 508995.0 FinneganScanNumber: 3814 MStype: enumIsNormalMS rawFile: 16H146_5_120M.raw
35	gi|914673159	amino acid ABC transporter substrate-binding protein [Roseovarius tolerans]	224	36052	25	1	4	1	2438	4	0	0	506.746	1011.48	2	1011.48	-0.0004	0	21.6	86	R	NTTWTFSR	D					Elution from: 58.247 to 58.247 period: 0 experiment: 1 cycles: 1 precIntensity: 102431.0 FinneganScanNumber: 5155 MStype: enumIsNormalMS rawFile: 16H146_5_120M.raw
35	gi|914673159	amino acid ABC transporter substrate-binding protein [Roseovarius tolerans]	224	36052	25	1	4	1	2439	2	0	0	506.746	1011.48	2	1011.48	-0.0003	0	26.48	28	R	NTTWTFSR	D					Elution from: 60.373 to 60.373 period: 0 experiment: 1 cycles: 1 precIntensity: 71735.0 FinneganScanNumber: 5383 MStype: enumIsNormalMS rawFile: 16H146_5_120M.raw
35	gi|914673159	amino acid ABC transporter substrate-binding protein [Roseovarius tolerans]	224	36052	25	1	4	1	2441	1	0	0	506.746	1011.48	2	1011.48	-0.0003	0	24.65	42	R	NTTWTFSR	D					Elution from: 66.578 to 66.578 period: 0 experiment: 1 cycles: 1 precIntensity: 129862.0 FinneganScanNumber: 6040 MStype: enumIsNormalMS rawFile: 16H146_5_120M.raw
35	gi|914673159	amino acid ABC transporter substrate-binding protein [Roseovarius tolerans]	224	36052	25	1	4	1	2444	3	0	0	506.746	1011.48	2	1011.48	0.0002	0	20.16	120	R	NTTWTFSR	D					Elution from: 74.958 to 74.958 period: 0 experiment: 1 cycles: 1 precIntensity: 60732.0 FinneganScanNumber: 6882 MStype: enumIsNormalMS rawFile: 16H146_5_120M.raw
35	gi|914673159	amino acid ABC transporter substrate-binding protein [Roseovarius tolerans]	224	36052	25	1	4	1	2446	1	0	0	506.746	1011.48	2	1011.48	0.0004	0	34.54	4.4	R	NTTWTFSR	D					Elution from: 60.323 to 60.323 period: 0 experiment: 1 cycles: 1 precIntensity: 115873.0 FinneganScanNumber: 5377 MStype: enumIsNormalMS rawFile: 16H146_5_120M.raw
35	gi|914673159	amino acid ABC transporter substrate-binding protein [Roseovarius tolerans]	224	36052	25	1	4	1	2448	1	0	0	506.747	1011.48	2	1011.48	0.0015	0	33.47	3.9	R	NTTWTFSR	D					Elution from: 64.533 to 64.533 period: 0 experiment: 1 cycles: 1 precIntensity: 88387.0 FinneganScanNumber: 5831 MStype: enumIsNormalMS rawFile: 16H146_5_120M.raw
35	gi|914673159	amino acid ABC transporter substrate-binding protein [Roseovarius tolerans]	224	36052	25	1	4	1	5623	1	1	0	755.882	1509.75	2	1509.75	0	0	53.51	0.13	R	FTALASGEIDMLAR	N	Oxidation (M)	0.00000000002000.0			Elution from: 112.250 to 112.250 period: 0 experiment: 1 cycles: 1 precIntensity: 44008.0 FinneganScanNumber: 10261 MStype: enumIsNormalMS rawFile: 16H146_5_120M.raw
35	gi|914673159	amino acid ABC transporter substrate-binding protein [Roseovarius tolerans]	224	36052	25	1	4	1	7281	1	0	0	1007.55	2013.08	2	2013.08	0.0025	0	90.12	2.7e-05	R	AVAAAVLGDPTAVEFVPTTGK	T					Elution from: 113.068 to 113.068 period: 0 experiment: 1 cycles: 1 precIntensity: 62496.0 FinneganScanNumber: 10349 MStype: enumIsNormalMS rawFile: 16H146_5_120M.raw
35	gi|914673159	amino acid ABC transporter substrate-binding protein [Roseovarius tolerans]	224	36052	25	1	4	1	7283	1	0	0	1007.55	2013.08	2	2013.08	0.0035	0	43.89	1.1	R	AVAAAVLGDPTAVEFVPTTGK	T					Elution from: 112.957 to 112.957 period: 0 experiment: 1 cycles: 1 precIntensity: 45189.0 FinneganScanNumber: 10338 MStype: enumIsNormalMS rawFile: 16H146_5_120M.raw
36	gi|872579816	peptide ABC transporter substrate-binding protein [Marinovum algicola]	218	59384	5	2	3	1	3003	1	1	1	565.326	1128.64	2	1128.64	-0.0021	0	26.88	51	K	ALLADVADITK	T					Elution from: 74.257 to 74.257 period: 0 experiment: 1 cycles: 1 precIntensity: 24670.0 FinneganScanNumber: 6812 MStype: enumIsNormalMS rawFile: 16H146_5_120M.raw
36	gi|872579816	peptide ABC transporter substrate-binding protein [Marinovum algicola]	218	59384	5	2	3	1	3219	1	1	1	584.306	1166.6	2	1166.6	0.0002	0	55.63	0.06	K	IVDGEFGVGFK	L					Elution from: 112.397 to 112.397 period: 0 experiment: 1 cycles: 1 precIntensity: 114641.0 FinneganScanNumber: 10278 MStype: enumIsNormalMS rawFile: 16H146_5_120M.raw
36	gi|872579816	peptide ABC transporter substrate-binding protein [Marinovum algicola]	218	59384	5	2	3	1	3222	1	1	1	584.307	1166.6	2	1166.6	0.0016	0	44.61	1	K	IVDGEFGVGFK	L					Elution from: 112.340 to 112.340 period: 0 experiment: 1 cycles: 1 precIntensity: 133205.0 FinneganScanNumber: 10271 MStype: enumIsNormalMS rawFile: 16H146_5_120M.raw
36	gi|872579816	peptide ABC transporter substrate-binding protein [Marinovum algicola]	218	59384	5	2	3	1	6760	1	1	1	908.489	1814.96	2	1814.96	-0.0001	0	98.79	4.2e-06	R	QTALVTGDVDAVSAIDLK	T					Elution from: 111.318 to 111.318 period: 0 experiment: 1 cycles: 1 precIntensity: 48520.0 FinneganScanNumber: 10155 MStype: enumIsNormalMS rawFile: 16H146_5_120M.raw
36	gi|872579816	peptide ABC transporter substrate-binding protein [Marinovum algicola]	218	59384	5	2	3	1	6761	1	1	1	908.489	1814.96	2	1814.96	0.0009	0	135.43	8.7e-10	R	QTALVTGDVDAVSAIDLK	T					Elution from: 111.370 to 111.370 period: 0 experiment: 1 cycles: 1 precIntensity: 66417.0 FinneganScanNumber: 10161 MStype: enumIsNormalMS rawFile: 16H146_5_120M.raw
37	gi|872579393	ubiquinol-cytochrome c reductase iron-sulfur subunit [Marinovum algicola]	216	20238	5	3	3	2	5236	1	1	1	713.382	1424.75	2	1424.75	-0.0016	0	45.5	0.63	R	AVDLDDLIDPIAR	N					Elution from: 101.998 to 101.998 period: 0 experiment: 1 cycles: 1 precIntensity: 12423.0 FinneganScanNumber: 9290 MStype: enumIsNormalMS rawFile: 16H146_5_120M.raw
37	gi|872579393	ubiquinol-cytochrome c reductase iron-sulfur subunit [Marinovum algicola]	216	20238	5	3	3	2	5237	1	1	1	713.383	1424.75	2	1424.75	0.0004	0	56.24	0.055	R	AVDLDDLIDPIAR	N					Elution from: 102.045 to 102.045 period: 0 experiment: 1 cycles: 1 precIntensity: 23379.0 FinneganScanNumber: 9294 MStype: enumIsNormalMS rawFile: 16H146_5_120M.raw
37	gi|872579393	ubiquinol-cytochrome c reductase iron-sulfur subunit [Marinovum algicola]	216	20238	5	3	3	2	5814	1	1	1	780.417	1558.82	2	1558.82	0.0001	0	56.91	0.073	R	VDVSGVEQGTQLTVK	W					Elution from: 49.198 to 49.198 period: 0 experiment: 1 cycles: 1 precIntensity: 72645.0 FinneganScanNumber: 4186 MStype: enumIsNormalMS rawFile: 16H146_5_120M.raw
37	gi|872579393	ubiquinol-cytochrome c reductase iron-sulfur subunit [Marinovum algicola]	216	20238	5	3	3	2	5953	1	1	1	794.864	1587.71	2	1587.71	0.0006	0	94.11	5.5e-06	R	NPNISGETAATDENR	T					Elution from: 19.942 to 19.942 period: 0 experiment: 1 cycles: 1 precIntensity: 59056.0 FinneganScanNumber: 1205 MStype: enumIsNormalMS rawFile: 16H146_5_120M.raw
37	gi|872579393	ubiquinol-cytochrome c reductase iron-sulfur subunit [Marinovum algicola]	216	20238	5	3	3	2	5954	1	1	1	794.864	1587.71	2	1587.71	0.0012	0	103.28	6.4e-07	R	NPNISGETAATDENR	T					Elution from: 19.920 to 19.920 period: 0 experiment: 1 cycles: 1 precIntensity: 78427.0 FinneganScanNumber: 1203 MStype: enumIsNormalMS rawFile: 16H146_5_120M.raw
38	gi|62432803	photosystem II protein D2 [Akashiwo sanguinea]	215	33389	11	5	3	2	3514	2	1	0	607.308	1212.6	2	1212.6	-0.0015	0	34.44	7.1	R	AYDFISQELK	A					Elution from: 70.350 to 70.350 period: 0 experiment: 1 cycles: 1 precIntensity: 52015.0 FinneganScanNumber: 6426 MStype: enumIsNormalMS rawFile: 16H146_5_120M.raw
38	gi|62432803	photosystem II protein D2 [Akashiwo sanguinea]	215	33389	11	5	3	2	3518	2	1	0	607.308	1212.6	2	1212.6	-0.0003	0	37.88	3.1	R	AYDFISQELK	A					Elution from: 70.413 to 70.413 period: 0 experiment: 1 cycles: 1 precIntensity: 141987.0 FinneganScanNumber: 6433 MStype: enumIsNormalMS rawFile: 16H146_5_120M.raw
38	gi|62432803	photosystem II protein D2 [Akashiwo sanguinea]	215	33389	11	5	3	2	3519	2	1	0	607.309	1212.6	2	1212.6	0.0002	0	33.2	9	R	AYDFISQELK	A					Elution from: 112.797 to 112.797 period: 0 experiment: 1 cycles: 1 precIntensity: 48479.0 FinneganScanNumber: 10321 MStype: enumIsNormalMS rawFile: 16H146_5_120M.raw
38	gi|62432803	photosystem II protein D2 [Akashiwo sanguinea]	215	33389	11	5	3	2	5760	1	1	0	774.348	1546.68	2	1546.68	-0.0016	0	24.06	38	K	AAEDPEFETFYTK	N					Elution from: 66.293 to 66.293 period: 0 experiment: 1 cycles: 1 precIntensity: 30828.0 FinneganScanNumber: 6010 MStype: enumIsNormalMS rawFile: 16H146_5_120M.raw
38	gi|62432803	photosystem II protein D2 [Akashiwo sanguinea]	215	33389	11	5	3	2	5763	1	1	0	774.349	1546.68	2	1546.68	0.0005	0	27.47	19	K	AAEDPEFETFYTK	N					Elution from: 86.890 to 86.890 period: 0 experiment: 1 cycles: 1 precIntensity: 13848.0 FinneganScanNumber: 7973 MStype: enumIsNormalMS rawFile: 16H146_5_120M.raw
38	gi|62432803	photosystem II protein D2 [Akashiwo sanguinea]	215	33389	11	5	3	2	5765	1	1	0	774.349	1546.68	2	1546.68	0.001	0	32.49	5.8	K	AAEDPEFETFYTK	N					Elution from: 84.042 to 84.042 period: 0 experiment: 1 cycles: 1 precIntensity: 24111.0 FinneganScanNumber: 7719 MStype: enumIsNormalMS rawFile: 16H146_5_120M.raw
38	gi|62432803	photosystem II protein D2 [Akashiwo sanguinea]	215	33389	11	5	3	2	5766	1	1	0	774.35	1546.68	2	1546.68	0.0022	0	88.37	1.4e-05	K	AAEDPEFETFYTK	N					Elution from: 64.193 to 64.193 period: 0 experiment: 1 cycles: 1 precIntensity: 420655.0 FinneganScanNumber: 5794 MStype: enumIsNormalMS rawFile: 16H146_5_120M.raw
38	gi|62432803	photosystem II protein D2 [Akashiwo sanguinea]	215	33389	11	5	3	2	5767	1	1	0	774.35	1546.69	2	1546.68	0.0024	0	63.3	0.0045	K	AAEDPEFETFYTK	N					Elution from: 64.235 to 64.235 period: 0 experiment: 1 cycles: 1 precIntensity: 366173.0 FinneganScanNumber: 5799 MStype: enumIsNormalMS rawFile: 16H146_5_120M.raw
38	gi|62432803	photosystem II protein D2 [Akashiwo sanguinea]	215	33389	11	5	3	2	7312	1	1	1	1014.97	2027.93	2	2027.93	0.0016	0	89.24	2.6e-05	R	AFSPTQPEETYSMVTANR	F					Elution from: 69.513 to 69.513 period: 0 experiment: 1 cycles: 1 precIntensity: 37246.0 FinneganScanNumber: 6340 MStype: enumIsNormalMS rawFile: 16H146_5_120M.raw
38	gi|62432803	photosystem II protein D2 [Akashiwo sanguinea]	215	33389	11	5	3	2	7313	1	1	1	1014.97	2027.93	2	2027.93	0.0025	0	65.15	0.0066	R	AFSPTQPEETYSMVTANR	F					Elution from: 69.657 to 69.657 period: 0 experiment: 1 cycles: 1 precIntensity: 45434.0 FinneganScanNumber: 6354 MStype: enumIsNormalMS rawFile: 16H146_5_120M.raw
38	gi|62432803	photosystem II protein D2 [Akashiwo sanguinea]	215	33389	11	5	3	2	7314	1	1	1	1014.97	2027.93	2	2027.93	0.003	0	69.24	0.0025	R	AFSPTQPEETYSMVTANR	F					Elution from: 69.560 to 69.560 period: 0 experiment: 1 cycles: 1 precIntensity: 40693.0 FinneganScanNumber: 6344 MStype: enumIsNormalMS rawFile: 16H146_5_120M.raw
39	gi|872568391	type I glutamate--ammonia ligase [Marinovum algicola]	211	52945	9	4	4	2	4773	1	1	1	681.86	1361.71	2	1361.71	-0.0033	0	34.93	9.6	K	YVIHNVAQAYGK	S					Elution from: 37.862 to 37.862 period: 0 experiment: 1 cycles: 1 precIntensity: 24111.0 FinneganScanNumber: 2984 MStype: enumIsNormalMS rawFile: 16H146_5_120M.raw
39	gi|872568391	type I glutamate--ammonia ligase [Marinovum algicola]	211	52945	9	4	4	2	5691	1	1	0	764.375	1526.73	2	1526.74	-0.0019	0	30.45	21	K	ALNAFTNPSTNSYK	R					Elution from: 47.205 to 47.205 period: 0 experiment: 1 cycles: 1 precIntensity: 51743.0 FinneganScanNumber: 3978 MStype: enumIsNormalMS rawFile: 16H146_5_120M.raw
39	gi|872568391	type I glutamate--ammonia ligase [Marinovum algicola]	211	52945	9	4	4	2	5692	1	1	0	764.375	1526.74	2	1526.74	-0.0013	0	40.95	1.9	K	ALNAFTNPSTNSYK	R					Elution from: 47.268 to 47.268 period: 0 experiment: 1 cycles: 1 precIntensity: 34544.0 FinneganScanNumber: 3984 MStype: enumIsNormalMS rawFile: 16H146_5_120M.raw
39	gi|872568391	type I glutamate--ammonia ligase [Marinovum algicola]	211	52945	9	4	4	2	6568	1	1	1	881.924	1761.83	2	1761.83	0.0018	0	63.4	0.012	K	GGYFPVNPIDDGQDIR	S					Elution from: 113.615 to 113.615 period: 0 experiment: 1 cycles: 1 precIntensity: 454844.0 FinneganScanNumber: 10404 MStype: enumIsNormalMS rawFile: 16H146_5_120M.raw
39	gi|872568391	type I glutamate--ammonia ligase [Marinovum algicola]	211	52945	9	4	4	2	6569	1	1	1	881.924	1761.83	2	1761.83	0.0023	0	77.09	0.00052	K	GGYFPVNPIDDGQDIR	S					Elution from: 113.652 to 113.652 period: 0 experiment: 1 cycles: 1 precIntensity: 408933.0 FinneganScanNumber: 10409 MStype: enumIsNormalMS rawFile: 16H146_5_120M.raw
39	gi|872568391	type I glutamate--ammonia ligase [Marinovum algicola]	211	52945	9	4	4	2	7321	1	1	1	1017.95	2033.88	2	2033.88	0.0046	0	57.73	0.015	K	LMPDCDSAYIDPFYAEK	T					Elution from: 88.432 to 88.432 period: 0 experiment: 1 cycles: 1 precIntensity: 30454.0 FinneganScanNumber: 8109 MStype: enumIsNormalMS rawFile: 16H146_5_120M.raw
39	gi|872568391	type I glutamate--ammonia ligase [Marinovum algicola]	211	52945	9	4	4	2	7358	1	1	1	1025.94	2049.87	2	2049.87	0.0023	0	54.46	0.024	K	LMPDCDSAYIDPFYAEK	T	Oxidation (M)	0.02000000000000000.0			Elution from: 114.318 to 114.318 period: 0 experiment: 1 cycles: 1 precIntensity: 108880.0 FinneganScanNumber: 10477 MStype: enumIsNormalMS rawFile: 16H146_5_120M.raw
39	gi|872568391	type I glutamate--ammonia ligase [Marinovum algicola]	211	52945	9	4	4	2	7359	1	1	1	1025.94	2049.87	2	2049.87	0.0025	0	38.84	0.89	K	LMPDCDSAYIDPFYAEK	T	Oxidation (M)	0.02000000000000000.0			Elution from: 113.297 to 113.297 period: 0 experiment: 1 cycles: 1 precIntensity: 36017.0 FinneganScanNumber: 10371 MStype: enumIsNormalMS rawFile: 16H146_5_120M.raw
39	gi|872568391	type I glutamate--ammonia ligase [Marinovum algicola]	211	52945	9	4	4	2	7360	1	1	1	1025.94	2049.87	2	2049.87	0.0031	0	32.33	3.7	K	LMPDCDSAYIDPFYAEK	T	Oxidation (M)	0.02000000000000000.0			Elution from: 81.640 to 81.640 period: 0 experiment: 1 cycles: 1 precIntensity: 31268.0 FinneganScanNumber: 7504 MStype: enumIsNormalMS rawFile: 16H146_5_120M.raw
40	gi|872576798	beta-ketoacyl-ACP reductase [Marinovum algicola]	207	25448	11	2	5	1	1679	2	1	0	437.261	872.507	2	872.508	-0.0008	0	38.27	6.1	R	IALVTGGSR	G					Elution from: 25.195 to 25.195 period: 0 experiment: 1 cycles: 1 precIntensity: 58457.0 FinneganScanNumber: 1708 MStype: enumIsNormalMS rawFile: 16H146_5_120M.raw
40	gi|872576798	beta-ketoacyl-ACP reductase [Marinovum algicola]	207	25448	11	2	5	1	1897	4	1	0	462.737	923.459	2	923.46	-0.0011	0	23.37	74	K	FTEETGIK	T					Elution from: 20.698 to 20.698 period: 0 experiment: 1 cycles: 1 precIntensity: 150994.0 FinneganScanNumber: 1275 MStype: enumIsNormalMS rawFile: 16H146_5_120M.raw
40	gi|872576798	beta-ketoacyl-ACP reductase [Marinovum algicola]	207	25448	11	2	5	1	1898	1	1	0	462.737	923.46	2	923.46	-0.0004	0	24.68	55	K	FTEETGIK	T					Elution from: 20.635 to 20.635 period: 0 experiment: 1 cycles: 1 precIntensity: 164959.0 FinneganScanNumber: 1269 MStype: enumIsNormalMS rawFile: 16H146_5_120M.raw
40	gi|872576798	beta-ketoacyl-ACP reductase [Marinovum algicola]	207	25448	11	2	5	1	3069	1	1	1	570.823	1139.63	2	1139.63	0.0008	0	32.15	8.3	R	ESIIGQIPAGR	L					Elution from: 50.120 to 50.120 period: 0 experiment: 1 cycles: 1 precIntensity: 45109.0 FinneganScanNumber: 4284 MStype: enumIsNormalMS rawFile: 16H146_5_120M.raw
40	gi|872576798	beta-ketoacyl-ACP reductase [Marinovum algicola]	207	25448	11	2	5	1	3070	3	1	1	570.823	1139.63	2	1139.63	0.0009	0	35.22	4.1	R	ESIIGQIPAGR	L					Elution from: 50.142 to 50.142 period: 0 experiment: 1 cycles: 1 precIntensity: 62403.0 FinneganScanNumber: 4287 MStype: enumIsNormalMS rawFile: 16H146_5_120M.raw
40	gi|872576798	beta-ketoacyl-ACP reductase [Marinovum algicola]	207	25448	11	2	5	1	3172	1	1	1	579.839	1157.66	2	1157.67	-0.0015	0	42.92	1.1	R	VIVISSINGQK	G	Deamidated (NQ)	0.00000000010.0			Elution from: 50.788 to 50.788 period: 0 experiment: 1 cycles: 1 precIntensity: 38006.0 FinneganScanNumber: 4354 MStype: enumIsNormalMS rawFile: 16H146_5_120M.raw
40	gi|872576798	beta-ketoacyl-ACP reductase [Marinovum algicola]	207	25448	11	2	5	1	3173	5	1	1	579.839	1157.66	2	1157.67	-0.0012	0	23.9	87	R	VIVISSINGQK	G	Deamidated (NQ)	0.00000001000.0			Elution from: 46.285 to 46.285 period: 0 experiment: 1 cycles: 1 precIntensity: 44424.0 FinneganScanNumber: 3881 MStype: enumIsNormalMS rawFile: 16H146_5_120M.raw
40	gi|872576798	beta-ketoacyl-ACP reductase [Marinovum algicola]	207	25448	11	2	5	1	3175	3	1	1	579.84	1157.66	2	1157.67	-0.0009	0	29.01	30	R	VIVISSINGQK	G	Deamidated (NQ)	0.00000000010.0			Elution from: 50.843 to 50.843 period: 0 experiment: 1 cycles: 1 precIntensity: 70513.0 FinneganScanNumber: 4360 MStype: enumIsNormalMS rawFile: 16H146_5_120M.raw
40	gi|872576798	beta-ketoacyl-ACP reductase [Marinovum algicola]	207	25448	11	2	5	1	3176	1	1	1	579.84	1157.67	2	1157.67	-0.0005	0	34.58	6.9	R	VIVISSINGQK	G	Deamidated (NQ)	0.00000001000.0			Elution from: 46.242 to 46.242 period: 0 experiment: 1 cycles: 1 precIntensity: 39357.0 FinneganScanNumber: 3876 MStype: enumIsNormalMS rawFile: 16H146_5_120M.raw
40	gi|872576798	beta-ketoacyl-ACP reductase [Marinovum algicola]	207	25448	11	2	5	1	4150	1	1	0	649.33	1296.65	2	1296.65	0.0001	0	65.85	0.0052	K	GQFAQVNYAATK	A					Elution from: 35.577 to 35.577 period: 0 experiment: 1 cycles: 1 precIntensity: 126153.0 FinneganScanNumber: 2753 MStype: enumIsNormalMS rawFile: 16H146_5_120M.raw
40	gi|872576798	beta-ketoacyl-ACP reductase [Marinovum algicola]	207	25448	11	2	5	1	4151	1	1	0	649.331	1296.65	2	1296.65	0.0011	0	65.99	0.006	K	GQFAQVNYAATK	A					Elution from: 35.638 to 35.638 period: 0 experiment: 1 cycles: 1 precIntensity: 140669.0 FinneganScanNumber: 2759 MStype: enumIsNormalMS rawFile: 16H146_5_120M.raw
[truncated: 1,134 more rows]

## Sheet: Second Biological Replicate
Second Biological Replicate
[truncated: 2,188 more rows]
