# Supplementary material for: Biochemical Mapping of Pyrodinium bahamense Unveils Molecular Underpinnings behind Organismal Processes
Source: Int J Mol Sci. 2021 Dec 11;22(24):13332. doi: 10.3390/ijms222413332 (PMC8706660; doi:10.3390/ijms222413332)
Supplement: Supplementary file 1 [file ijms-22-13332-s001.zip › Supplementary infor_Salvador-Reyes/Supplementary Dataset 2_ Salvador-Reyes_Pyrodinium.xlsx]

## Sheet: M.algicola
			Minimal variation factor	50	%
					Sample 5	Sample 6			Sample 5	Sample 6
				Median	20.8072	20.7766		Sum of LFQ intensities	3153769289	3362642818
ID	Protein IDs	Majority protein IDs	Protein name	Number of proteins in group	LFQ Sample 5 (log2(x))	LFQ Sample 6 (log2(x))	LFQ Sample 5 normalized	LFQ Sample 6 normalized	Abundance in Sample 5 [%]	Abundance in Sample 6 [%]	variation factor [LFQ Sample 6]/[LFQ Sample5]	possible variation between Samples	Peptides	Unique peptides	Unique peptides Sample 5	Unique peptides Sample 6	Sequence coverage [%]	Mol. weight [kDa]	Sequence length	Q-value	Score	Identification type Sample 5	Identification type Sample 6	Intensity	Intensity Sample 5	Intensity Sample 6	LFQ intensity Sample 5	LFQ intensity Sample 6
155	gi|872571532;gi|868876740;gi|960381708;gi|949485202	gi|872571532;gi|868876740;gi|960381708;gi|949485202	beta-ketoacyl-ACP reductase [Marinovum algicola];3-oxoacyl-(acyl-carrier-protein) reductase [Marinovum algicola DG 898];3-oxoacyl-[acyl-carrier-protein] reductase [Ruegeria atlantica];3-oxoacyl-[acyl-carrier-protein] reductase FabG [Ruegeria atlantica]	4	20.7096	n.d.	0.995309		0.054373	n.d.		?variant?	2	2	1	1	13.1	25.179	245	0	34.395	By MS/MS	By MS/MS	2281300	1714800	566480	1714800	0
301	gi|872589143;gi|868879090	gi|872589143;gi|868879090	hypothetical protein [Marinovum algicola];TRAP transporter solute receptor, TAXI family (plasmid) [Marinovum algicola DG 898]	2	n.d.	20.4952		0.986457	n.d.	0.0468646		?variant?	4	4	0	4	18.5	34.827	324	0	10.226		By MS/MS	4159400	0	4159400	0	1478000
139	gi|872571364;gi|868876568	gi|872571364;gi|868876568	3-hydroxyisobutyrate dehydrogenase [Marinovum algicola];3-hydroxyisobutyrate dehydrogenase [Marinovum algicola DG 898]	2	n.d.	19.0541		0.917093	n.d.	0.017259		?variant?	3	3	1	2	18.3	29.585	290	0	7.7847	By MS/MS	By MS/MS	1783600	251780	1531800	0	544310
32	gi|872560335;gi|868875084;gi|949487354	gi|872560335;gi|868875084;gi|949487354	30S ribosomal protein S17 [Marinovum algicola];30S ribosomal protein S17 [Marinovum algicola DG 898];30S ribosomal protein S17 [Ruegeria atlantica]	3	20.3688	n.d.	0.97893		0.0429328	n.d.		?variant?	2	2	2	0	36.8	8.7671	76	0	7.6398	By MS/MS		2979400	2979400	0	1354000	0
269	gi|872579813;gi|868878012	gi|872579813;gi|868878012	ABC transporter ATP-binding protein [Marinovum algicola];ATPase component of various ABC-type transport system [Marinovum algicola DG 898]	2	n.d.	20.4028		0.98201	n.d.	0.0439569		?variant?	3	3	0	3	9.8	60.83	550	0	6.2837		By MS/MS	4026800	0	4026800	0	1386300
311	gi|872596238;gi|868879571	gi|872596238;gi|868879571	oxidoreductase [Marinovum algicola];Aldo/keto reductase (plasmid) [Marinovum algicola DG 898]	2	n.d.	n.d.			n.d.	n.d.		?variant?	1	1	0	1	4.3	29.739	276	0	3.6785		By MS/MS	0	0	0	0	0
35	gi|872560421;gi|868875088	gi|872560421;gi|868875088	30S ribosomal protein S14 [Marinovum algicola];Ribosomal protein S14 [Marinovum algicola DG 898]	2	20.1777	n.d.	0.969744		0.0376058	n.d.		?variant?	1	1	1	0	12.9	11.705	101	0	3.3885	By MS/MS		1703100	1703100	0	1186000	0
302	gi|872589903;gi|868879127	gi|872589903;gi|868879127	D-ribose ABC transporter substrate-binding protein [Marinovum algicola];putative erythritol ABC transporter 2, substrate-binding protein component (plasmid) [Marinovum algicola DG 898]	2	n.d.	18.724		0.901205	n.d.	0.0137293		?variant?	2	2	0	2	10.8	32.757	314	0	3.1906		By MS/MS	1218500	0	1218500	0	432990
278	gi|872581043;gi|868878096	gi|872581043;gi|868878096	ABC transporter ATP-binding protein [Marinovum algicola];ATPase component of various ABC-type transport system [Marinovum algicola DG 898]	2	n.d.	17.4922		0.841917	n.d.	0.0058457		?variant?	1	1	0	1	2.2	59.918	547	0	3.135		By MS/MS	518810	0	518810	0	184360
281	gi|872582255;gi|868878167	gi|872582255;gi|868878167	protein-export chaperone SecB [Marinovum algicola];protein-export chaperone SecB [Marinovum algicola DG 898]	2	17.6598	n.d.	0.848736		0.00656611	n.d.		?variant?	1	1	1	0	13.1	19.795	175	0	2.7747	By MS/MS		207080	207080	0	207080	0
276	gi|872580945;gi|868878091	gi|872580945;gi|868878091	thiol reductase thioredoxin [Marinovum algicola];thioredoxin [Marinovum algicola DG 898]	2	n.d.	18.7541		0.902658	n.d.	0.0140194		?variant?	2	2	0	2	29	11.36	107	0	2.7294		By MS/MS	1244200	0	1244200	0	442140
226	gi|872579061;gi|868877548	gi|872579061;gi|868877548	PEBP family protein [Marinovum algicola];hypothetical protein MALG_02963 [Marinovum algicola DG 898]	2	n.d.	17.7774		0.855645	n.d.	0.00712354		?variant?	1	1	0	1	8	23.091	213	0	2.4553		By MS/MS	632220	0	632220	0	224660
90	gi|960386097;gi|960381765;gi|949485008;gi|872566460;gi|868875923	gi|960386097;gi|960381765;gi|949485008;gi|872566460;gi|868875923	sarcosine oxidase subunit beta [Ruegeria atlantica];sarcosine oxidase subunit beta [Ruegeria atlantica];Sarcosine oxidase subunit beta [Ruegeria atlantica];sarcosine oxidase subunit beta [Marinovum algicola];sarcosine oxidase, beta subunit family, heterote	5	n.d.	17.5307		0.843772	n.d.	0.00600393		?variant?	1	1	0	1	3.4	45.284	414	0	2.4041		By MS/MS	532850	0	532850	0	189350
152	gi|872571507;gi|868876713	gi|872571507;gi|868876713	3-oxoacyl-ACP reductase [Marinovum algicola];Dehydrogenase with variable specificity [Marinovum algicola DG 898]	2	19.3437	n.d.	0.929662		0.0210957	n.d.		?variant?	2	2	2	0	10.2	27.438	256	0	2.2963	By MS/MS		665310	665310	0	665310	0
48	gi|872561789;gi|868875182	gi|872561789;gi|868875182	protease TldD [Marinovum algicola];putative Zn-dependent protease and their inactivated-like protein [Marinovum algicola DG 898]	2	18.0859	n.d.	0.869214		0.00882214	n.d.		?variant?	2	2	2	0	6.1	49.756	473	0	2.1607	By MS/MS		334640	334640	0	278230	0
96	gi|872566889;gi|868875977	gi|872566889;gi|868875977	50S ribosomal protein L13 [Marinovum algicola];ribosomal protein L13, bacterial type [Marinovum algicola DG 898]	2	20.0953	n.d.	0.965786		0.0355194	n.d.		?variant?	1	1	1	0	13	17.231	154	0	1.9767	By MS/MS		1768000	1768000	0	1120200	0
287	gi|872587693;gi|868878552	gi|872587693;gi|868878552	MBL fold hydrolase [Marinovum algicola];Metal-dependent hydrolase of the beta-lactamase superfamily II (plasmid) [Marinovum algicola DG 898]	2	n.d.	18.0486		0.868698	n.d.	0.0085967		?variant?	1	1	0	1	5.2	35.448	327	0	1.8868		By MS/MS	762960	0	762960	0	271120
341	gi|960380135;gi|949486717	gi|960380135;gi|949486717	C4-dicarboxylate ABC transporter [Ruegeria atlantica];TRAP transporter solute receptor, DctP family [Ruegeria atlantica]	2	n.d.	19.6406		0.945325	n.d.	0.0259172		?variant?	1	1	0	1	6.9	40.392	364	0	1.8053		By MS/MS	2544300	0	2544300	0	817370
257	gi|872579612;gi|868877830	gi|872579612;gi|868877830	adenosine kinase [Marinovum algicola];Sugar kinase, ribokinase family [Marinovum algicola DG 898]	2	n.d.	18.9572		0.912429	n.d.	0.0161378		?variant?	2	2	0	2	8.5	34.624	329	0	1.7641		By MS/MS	1432300	0	1432300	0	508950
235	gi|960384324;gi|960380574;gi|949487127;gi|872579415;gi|868877659	gi|960384324;gi|960380574;gi|949487127;gi|872579415;gi|868877659	3-isopropylmalate dehydrogenase [Ruegeria atlantica];3-isopropylmalate dehydrogenase [Ruegeria atlantica];3-isopropylmalate dehydrogenase [Ruegeria atlantica];3-isopropylmalate dehydrogenase [Marinovum algicola];3-isopropylmalate dehydrogenase [Marinovum a	5	n.d.	18.9841		0.913725	n.d.	0.0164419		?variant?	1	1	0	1	3.3	39.831	367	0	1.7163		By MS/MS	1459200	0	1459200	0	518540
259	gi|872579645;gi|868877859	gi|872579645;gi|868877859	polyamine ABC transporter substrate-binding protein [Marinovum algicola];Putrescine ABC transporter putrescine-binding protein PotF [Marinovum algicola DG 898]	2	n.d.	19.1749		0.92291	n.d.	0.0187671		?variant?	2	2	0	2	7.2	39.566	361	0	1.6651		By MS/MS	1665600	0	1665600	0	591870
245	gi|872579512;gi|868877738	gi|872579512;gi|868877738	modulator protein [Marinovum algicola];putative Zn-dependent protease and their inactivated-like protein [Marinovum algicola DG 898]	2	18.5708	n.d.	0.892518		0.0123465	n.d.		?variant?	1	1	1	0	6	46.774	448	0	1.6455	By MS/MS		389380	389380	0	389380	0
41	gi|872560633;gi|868875102	gi|872560633;gi|868875102	30S ribosomal protein S13 [Marinovum algicola];30S ribosomal protein S13 [Marinovum algicola DG 898]	2	20.1612	n.d.	0.96895		0.0371777	n.d.		?variant?	1	1	1	0	10.7	13.686	122	0.0038462	1.6177	By MS/MS		1590700	1590700	0	1172500	0
253	gi|872579587;gi|868877808	gi|872579587;gi|868877808	carbamoyl phosphate synthase large subunit [Marinovum algicola];carbamoyl-phosphate synthase, large subunit [Marinovum algicola DG 898]	2	n.d.	n.d.			n.d.	n.d.		?variant?	1	1	0	1	1.9	119.86	1110	0.0038168	1.5876		By MS/MS	0	0	0	0	0
249	gi|872579545;gi|868877769	gi|872579545;gi|868877769	ribosomal subunit interface protein [Marinovum algicola];ribosomal subunit interface protein [Marinovum algicola DG 898]	2	n.d.	17.7939		0.856441	n.d.	0.00720566		?variant?	1	1	0	1	7.9	20.996	190	0.0037879	1.5714		By MS/MS	639520	0	639520	0	227250
180	gi|872586511;gi|868876991	gi|872586511;gi|868876991	peptide ABC transporter [Marinovum algicola];ABC-type dipeptide transport system, periplasmic component [Marinovum algicola DG 898]	2	n.d.	18.8392		0.90675	n.d.	0.0148705		?variant?	1	1	0	1	3	61.593	565	0.0037594	1.5447		By MS/MS	1319800	0	1319800	0	468980
92	gi|868875936;gi|872566620	gi|868875936;gi|872566620	WD40-like repeat protein [Marinovum algicola DG 898];quinoprotein [Marinovum algicola]	2	n.d.	17.6272		0.848417	n.d.	0.0064193		?variant?	1	1	0	1	2.6	44.492	430	0.0037175	1.5107		By MS/MS	569720	0	569720	0	202450
172	gi|872571678;gi|868876883	gi|872571678;gi|868876883	GlcNAc-PI de-N-acetylase [Marinovum algicola];Uncharacterized protein, LmbE-like protein [Marinovum algicola DG 898]	2	n.d.	17.0107		0.818745	n.d.	0.00418705		?variant?	1	1	0	1	4.5	27.96	245	0.0037037	1.4945		By MS/MS	371600	0	371600	0	132050
49	gi|872562094;gi|868875200	gi|872562094;gi|868875200	taurine ABC transporter substrate-binding protein [Marinovum algicola];Taurine-binding protein periplasmic protein TauA [Marinovum algicola DG 898]	2	18.768	n.d.	0.901997		0.0141551	n.d.		?variant?	3	3	1	2	7	34.382	329	0.00369	1.4873	By MS/MS	By MS/MS	7145300	704540	6440800	446420	0
204	gi|960384127;gi|960381652;gi|949487233;gi|872576533;gi|868877365	gi|960384127;gi|960381652;gi|949487233;gi|872576533;gi|868877365	MBL fold metallo-hydrolase [Ruegeria atlantica];MBL fold metallo-hydrolase [Ruegeria atlantica];Beta-lactamase hydrolase-like protein [Ruegeria atlantica];MBL fold hydrolase [Marinovum algicola];Zn-dependent hydrolase [Marinovum algicola DG 898]	5	n.d.	17.1931		0.827521	n.d.	0.00475114		?variant?	1	1	0	1	3.4	32.214	293	0.0036765	1.4812		By MS/MS	421660	0	421660	0	149840
63	gi|872562459;gi|868875345	gi|872562459;gi|868875345	hypothetical protein [Marinovum algicola];hypothetical protein MALG_00715 [Marinovum algicola DG 898]	2	n.d.	20.7716		0.99976	n.d.	0.0567607		?variant?	4	4	1	4	23.9	24.892	234	0.0036364	1.4382	By matching	By MS/MS	5506100	268090	5238000	0	1790100
292	gi|960386102;gi|960379053;gi|949484840;gi|872588078;gi|868878805	gi|960386102;gi|960379053;gi|949484840;gi|872588078;gi|868878805	iron ABC transporter substrate-binding protein [Ruegeria atlantica];iron ABC transporter substrate-binding protein [Ruegeria atlantica];Putative 2-aminoethylphosphonate-binding periplasmic protein precursor [Ruegeria atlantica];iron ABC transporter substra	5	n.d.	17.2779		0.831602	n.d.	0.00503873		?variant?	1	1	0	1	4.1	36.809	341	0.0035971	1.3565		By MS/MS	447180	0	447180	0	158910
85	gi|872584896;gi|868875808	gi|872584896;gi|868875808	hypothetical protein [Marinovum algicola];ABC-type nitrate/sulfonate/bicarbonate transport system, periplasmic component [Marinovum algicola DG 898]	2	n.d.	18.5921		0.894859	n.d.	0.0125301		?variant?	1	1	0	1	4.5	33.867	310	0.0035842	1.3189		By MS/MS	1112100	0	1112100	0	395170
105	gi|960379079;gi|949485806;gi|872567986;gi|868876085	gi|960379079;gi|949485806;gi|872567986;gi|868876085	alpha/beta hydrolase [Ruegeria atlantica];exosortase A system-associated hydrolase 1 [Ruegeria atlantica];alpha/beta hydrolase [Marinovum algicola];putative hydrolase of the alpha/beta superfamily [Marinovum algicola DG 898]	4	n.d.	19.6495		0.945753	n.d.	0.0260774		?variant?	1	1	0	1	5.1	24.31	217	0.0035714	1.3117		By MS/MS	2314400	0	2314400	0	822420
103	gi|872567661;gi|868876051	gi|872567661;gi|868876051	peroxiredoxin [Marinovum algicola];Peroxiredoxin [Marinovum algicola DG 898]	2	17.4081	n.d.	0.83664		0.00551499	n.d.		?variant?	1	1	1	0	8.7	20.362	183	0.0070671	1.2464	By MS/MS		173930	173930	0	173930	0
60	gi|872562393;gi|868875310	gi|872562393;gi|868875310	propionyl-CoA synthetase [Marinovum algicola];Acyl-coenzyme A synthetase/AMP-(fatty) acid ligase [Marinovum algicola DG 898]	2	n.d.	18.3767		0.884491	n.d.	0.0107922		?variant?	1	1	0	1	1.4	68.391	629	0.0070423	1.1854		By MS/MS	957810	0	957810	0	340360
333	gi|960385248;gi|960381735;gi|949485167	gi|960385248;gi|960381735;gi|949485167	aconitate hydratase [Ruegeria atlantica];aconitate hydratase [Ruegeria atlantica];Aconitate hydratase 1 [Ruegeria atlantica]	3	n.d.	20.703		0.99646	n.d.	0.0541257		?variant?	7	1	0	1	9.9	97.352	896	0.006993	1.1651	By matching	By MS/MS	4983400	0	4983400	0	1707000
140	gi|960385596;gi|960378905;gi|949485621;gi|872571405;gi|868876605	gi|960385596;gi|960378905;gi|949485621;gi|872571405;gi|868876605	endopeptidase La [Ruegeria atlantica];endopeptidase La [Ruegeria atlantica];Lon protease [Ruegeria atlantica];endopeptidase La [Marinovum algicola];ATP-dependent protease La [Marinovum algicola DG 898]	5	18.2642	n.d.	0.877783		0.00998266	n.d.		?variant?	2	2	2	1	2.4	88.593	802	0.0068729	1.0553	By MS/MS	By MS/MS	496870	496870	0	314830	0
115	gi|872571118;gi|868876372	gi|872571118;gi|868876372	invasion-associated locus B family protein [Marinovum algicola];Invasion protein B, involved in pathogenesis [Marinovum algicola DG 898]	2	16.7295	n.d.	0.804022		0.0034454	n.d.		?variant?	1	1	1	0	7.7	22.074	209	0.0068027	0.98346	By MS/MS		108660	108660	0	108660	0
93	gi|872566648;gi|868875944	gi|872566648;gi|868875944	preprotein translocase subunit YajC [Marinovum algicola];preprotein translocase, YajC subunit [Marinovum algicola DG 898]	2	n.d.	17.6751		0.850724	n.d.	0.00663619		?variant?	1	1	0	1	14.6	10.659	96	0.006734	0.97301		By MS/MS	588970	0	588970	0	209290
131	gi|872571311;gi|868876514	gi|872571311;gi|868876514	class II fumarate hydratase [Marinovum algicola];fumarate hydratase, class II [Marinovum algicola DG 898]	2	n.d.	18.9602		0.912576	n.d.	0.0161721		?variant?	2	2	0	2	2.8	49.755	463	0.0067114	0.96013		By MS/MS	1435300	0	1435300	0	510030
18	gi|872557623;gi|868874840	gi|872557623;gi|868874840	UDP-N-acetylglucosamine 1-carboxyvinyltransferase [Marinovum algicola];UDP-N-acetylglucosamine 1-carboxyvinyltransferase [Marinovum algicola DG 898]	2	n.d.	17.8465		0.858973	n.d.	0.00747328		?variant?	1	1	0	1	3.1	44.587	422	0.006689	0.89172		By MS/MS	663270	0	663270	0	235690
280	gi|960382960;gi|949484053;gi|872582199;gi|868878162	gi|960382960;gi|949484053;gi|872582199;gi|868878162	transcription termination factor Rho [Ruegeria atlantica];hypothetical protein RUA4292_04132 [Ruegeria atlantica];transcription termination factor Rho [Marinovum algicola];transcription termination factor Rho [Marinovum algicola DG 898]	4	n.d.	18.329		0.882197	n.d.	0.0104415		?variant?	1	1	0	1	3.5	47.121	423	0.0066225	0.85662		By MS/MS	926700	0	926700	0	329300
344	gi|960384319;gi|960380567;gi|949487121	gi|960384319;gi|960380567;gi|949487121	mechanosensitive ion channel protein [Ruegeria atlantica];mechanosensitive ion channel protein [Ruegeria atlantica];Potassium efflux system KefA precursor [Ruegeria atlantica]	3	n.d.	18.0959		0.870975	n.d.	0.00888334		?variant?	1	1	0	1	1.8	50.109	450	0.0066007	0.8438		By MS/MS	788420	0	788420	0	280160
144	gi|872571437;gi|868876643	gi|872571437;gi|868876643	acetolactate synthase small subunit [Marinovum algicola];acetolactate synthase, small subunit [Marinovum algicola DG 898]	2	n.d.	17.9477		0.863842	n.d.	0.00801612		?variant?	1	1	1	1	8.6	20.135	187	0.0065574	0.8102	By matching	By MS/MS	879500	168050	711450	0	252810
137	gi|872571356;gi|868876560	gi|872571356;gi|868876560	histidine kinase [Marinovum algicola];putative signal-transduction protein [Marinovum algicola DG 898]	2	n.d.	17.753		0.85447	n.d.	0.007004		?variant?	1	1	0	1	5.5	15.488	145	0.0064935	0.79461		By MS/MS	621600	0	621600	0	220890
331	gi|960386239;gi|960381369;gi|949484879	gi|960386239;gi|960381369;gi|949484879	5-oxopent-3-ene-1,2,5-tricarboxylate decarboxylase [Ruegeria atlantica];5-oxopent-3-ene-1,2,5-tricarboxylate decarboxylase [Ruegeria atlantica];Ureidoglycolate lyase [Ruegeria atlantica]	3	n.d.	20.4461		0.984092	n.d.	0.045295		?variant?	1	1	0	1	5.1	31.31	294	0.0096774	0.75139		By MS/MS	4446500	0	4446500	0	1428500
352	gi|960382675	gi|960382675	polyribonucleotide nucleotidyltransferase [Ruegeria atlantica]	1	20.3454	n.d.	0.977804		0.0422415	n.d.		?variant?	5	1	1	0	8.5	77.391	716	0.0095238	0.70972	By MS/MS	By matching	2102500	2102500	0	1332200	0
147	gi|872571466;gi|868876675	gi|872571466;gi|868876675	glucose-6-phosphate isomerase [Marinovum algicola];17 kDa surface antigen [Marinovum algicola DG 898]	2	18.7585	n.d.	0.90154		0.0140622	n.d.		?variant?	1	1	1	0	30	8.7618	90	0.0094637	0.69744	By MS/MS		443490	443490	0	443490	0
80	gi|872563113;gi|868875736	gi|872563113;gi|868875736	disulfide oxidoreductase [Marinovum algicola];Superfamily II RNA helicase [Marinovum algicola DG 898]	2	17.2193	n.d.	0.827564		0.00483834	n.d.		?variant?	1	1	1	0	1.7	109.65	1001	0.009434	0.69583	By MS/MS		240820	240820	0	152590	0
223	gi|868877542	gi|868877542	ribosomal protein S12, bacterial/organelle [Marinovum algicola DG 898]	1	22.334	18.8378	1.07338	0.906686	0.167641	0.0148568	0.844703		4	4	4	1	24.4	14.165	123	0	22.215	By MS/MS	By MS/MS	9056400	8014900	1041500	5287000	468550
184	gi|872572533;gi|868877104;gi|960385095;gi|960382578;gi|949486151	gi|872572533;gi|868877104	glutamate dehydrogenase [Marinovum algicola];Glutamate dehydrogenase/leucine dehydrogenase [Marinovum algicola DG 898]	5	18.0343	21.2914	0.866733	1.02478	0.00851204	0.0813788	1.18234		5	5	1	5	17.4	52.746	476	0	4.8654	By matching	By MS/MS	7925900	348220	7577600	268450	2566500
99	gi|872567221;gi|868876003;gi|960385366;gi|960379253;gi|949485329	gi|872567221;gi|868876003;gi|960385366;gi|960379253;gi|949485329	hypothetical protein [Marinovum algicola];hypothetical protein MALG_01383 [Marinovum algicola DG 898];nucleoside triphosphate hydrolase [Ruegeria atlantica];nucleoside triphosphate hydrolase [Ruegeria atlantica];hypothetical protein RUA4292_02191 [Ruegeria	5	19.6603	16.6291	0.944877	0.800378	0.0262724	0.00321393	0.847071		2	2	2	1	11	26.817	245	0	3.3297	By MS/MS	By matching	1070400	852520	217840	828570	101360
149	gi|872571473;gi|868876682	gi|872571473;gi|868876682	peptidyl-prolyl cis-trans isomerase [Marinovum algicola];Peptidyl-prolyl cis-trans isomerase (rotamase) - cyclophilin family [Marinovum algicola DG 898]	2	18.7166	21.5469	0.899524	1.03708	0.0136592	0.0971472	1.15292		2	2	2	2	18.1	19.913	193	0.0036101	1.3605	By matching	By MS/MS	10193000	447810	9744800	430780	3063800
29	gi|872560108;gi|868875064	gi|872560108;gi|868875064	RHS repeat-associated core domain-containing protein [Marinovum algicola];RHS repeat protein-associated core domain protein [Marinovum algicola DG 898]	2	26.6725	26.7086	1.28189	1.28551	3.3915	3.47743	1.00283		67	67	59	61	38.1	293.26	2735	0	323.31	By MS/MS	By MS/MS	497840000	137240000	360600000	106960000	109670000
150	gi|872571481;gi|868876689;gi|960378751	gi|872571481;gi|868876689	tricarboxylate transporter [Marinovum algicola];hypothetical protein MALG_02086 [Marinovum algicola DG 898]	3	26.4121	26.2498	1.26937	1.26343	2.83147	2.53012	0.995318		20	20	17	18	78	38.518	359	0	198.47	By MS/MS	By MS/MS	454570000	87018000	367550000	89298000	79794000
44	gi|872560961;gi|868875117	gi|872560961;gi|868875117	amino acid ABC transporter substrate-binding protein [Marinovum algicola];ABC-type amino acid transport/signal transduction system, periplasmic component/domain protein [Marinovum algicola DG 898]	2	29.0064	28.9659	1.39406	1.39416	17.0992	16.6258	1.00008		16	14	13	13	85.5	35.789	338	0	190.89	By MS/MS	By MS/MS	2562900000	688540000	1874400000	539270000	524340000
288	gi|872587698;gi|868878555	gi|872587698;gi|868878555	C4-dicarboxylate ABC transporter substrate-binding protein [Marinovum algicola];TRAP transporter solute receptor, TAXI family (plasmid) [Marinovum algicola DG 898]	2	26.3839	25.5319	1.26802	1.22888	2.77665	1.53825	0.969132		13	13	12	13	55.9	33.738	322	0	176.55	By MS/MS	By MS/MS	311550000	116740000	194810000	87569000	48513000
252	gi|872579586;gi|868877807	gi|872579586;gi|868877807	hypothetical protein [Marinovum algicola];Outer membrane protein V [Marinovum algicola DG 898]	2	21.1158	21.7243	1.01483	1.04561	0.0720566	0.109856	1.03033		2	2	2	2	12.6	26.688	247	0	150.6	By MS/MS	By MS/MS	13347000	3377700	9969300	2272500	3464600
62	gi|872562457;gi|868875344	gi|872562457;gi|868875344	hypothetical protein [Marinovum algicola];Uncharacterized protein MALG_00714 [Marinovum algicola DG 898]	2	26.2278	27.0197	1.26052	1.30049	2.49188	4.3142	1.03171		15	15	14	14	26.2	95.158	927	0	141.95	By MS/MS	By MS/MS	554690000	105210000	449480000	78588000	136060000
313	gi|872596299;gi|868879615	gi|872596299;gi|868879615	sugar ABC transporter substrate-binding protein [Marinovum algicola];ABC-type sugar transport system, periplasmic component (plasmid) [Marinovum algicola DG 898]	2	26.5187	26.2556	1.27449	1.26371	3.04851	2.54029	0.991538		13	13	12	13	52.6	47.587	435	0	135.04	By MS/MS	By MS/MS	499930000	125390000	374550000	96143000	80115000
286	gi|921086142;gi|868878538	gi|921086142;gi|868878538	hypothetical protein [Marinovum algicola];hypothetical protein MALG_03939 (plasmid) [Marinovum algicola DG 898]	2	26.3042	26.8198	1.26419	1.29087	2.62743	3.75614	1.0211		10	10	8	9	29.5	55.022	519	0	131.84	By MS/MS	By MS/MS	532860000	93629000	439230000	82863000	118460000
58	gi|872562334;gi|868875277;gi|960383224;gi|949487766	gi|872562334;gi|868875277	molecular chaperone GroEL [Marinovum algicola];chaperonin GroL [Marinovum algicola DG 898]	4	25.5759	24.8451	1.22919	1.19582	1.58598	0.955618	0.972856		19	19	18	17	42.2	58.147	550	0	127.29	By MS/MS	By MS/MS	185740000	56072000	129670000	50018000	30138000
54	gi|872562259;gi|868875231;gi|960383209;gi|949487785	gi|872562259;gi|868875231	ATP synthase subunit beta [Marinovum algicola];ATP synthase, F1 beta subunit [Marinovum algicola DG 898]	4	26.2032	25.9279	1.25933	1.24794	2.44977	2.02412	0.99095		18	18	18	16	65.4	50.479	474	0	125.83	By MS/MS	By MS/MS	316180000	108960000	207220000	77260000	63836000
264	gi|872579774;gi|868877977;gi|960383799;gi|960383178;gi|949487821	gi|872579774;gi|868877977	BMP family ABC transporter substrate-binding protein [Marinovum algicola];putative ABC-type transport system, periplasmic component/surface lipoprotein [Marinovum algicola DG 898]	5	24.2281	24.5359	1.16441	1.18094	0.623096	0.771268	1.0142		11	11	10	8	50.6	38.584	358	0	112.42	By MS/MS	By MS/MS	121530000	22329000	99203000	19651000	24324000
151	gi|872571500;gi|868876708	gi|872571500;gi|868876708	sugar ABC transporter substrate-binding protein [Marinovum algicola];ABC-type sugar transport system, periplasmic component [Marinovum algicola DG 898]	2	25.7524	26.4214	1.23767	1.27169	1.79236	2.84967	1.02749		17	17	12	17	61.2	45.735	412	0	102.68	By MS/MS	By MS/MS	384770000	72783000	311990000	56527000	89872000
143	gi|872571435;gi|868876641	gi|872571435;gi|868876641	ABC transporter substrate-binding protein [Marinovum algicola];TRAP-type mannitol/chloroaromatic compound transport system, periplasmic component [Marinovum algicola DG 898]	2	26.6353	26.5373	1.2801	1.27727	3.30525	3.08821	0.99779		10	10	7	10	50.7	38.787	359	0	95.666	By MS/MS	By MS/MS	526330000	105700000	420630000	104240000	97395000
16	gi|872557332;gi|868874801;gi|960384957;gi|960382318;gi|949486353	gi|872557332;gi|868874801	ABC transporter substrate-binding protein [Marinovum algicola];Glycerol-3-phosphate ABC transporter, permease protein UgpA [Marinovum algicola DG 898]	5	24.3386	24.8375	1.16972	1.19546	0.672687	0.950609	1.022		14	14	11	14	39.4	63.409	573	0	94.331	By MS/MS	By MS/MS	132500000	23927000	108570000	21215000	29980000
244	gi|872579507;gi|868877733	gi|872579507;gi|868877733	elongation factor Tu [Marinovum algicola];translation elongation factor TU [Marinovum algicola DG 898]	2	27.2247	26.74	1.30843	1.28702	4.9731	3.55384	0.983642		22	2	2	2	71.4	42.967	391	0	92.746	By MS/MS	By MS/MS	651090000	203270000	447820000	156840000	112080000
12	gi|872556994;gi|868874746	gi|872556994;gi|868874746	ABC transporter permease [Marinovum algicola];ABC-type branched-chain amino acid transport system, periplasmic component [Marinovum algicola DG 898]	2	23.2696	24.7185	1.11834	1.18973	0.320632	0.875334	1.06383		11	11	9	11	39.4	46.973	429	0	90.028	By MS/MS	By MS/MS	103860000	13940000	89920000	10112000	27606000
52	gi|872562253;gi|868875229;gi|960383775;gi|960383207;gi|949487787	gi|872562253;gi|868875229	ATP synthase subunit alpha [Marinovum algicola];proton translocating ATP synthase, F1 alpha subunit [Marinovum algicola DG 898]	5	26.0028	25.6012	1.2497	1.23221	2.13196	1.61397	0.986008		16	16	13	15	31.1	55.149	512	0	88.025	By MS/MS	By MS/MS	258770000	87251000	171520000	67237000	50901000
263	gi|872579724;gi|868877932;gi|960382885;gi|949484104	gi|872579724;gi|868877932	transporter [Marinovum algicola];Tricarboxylate transport protein TctC [Marinovum algicola DG 898]	4	25.4932	26.6614	1.22521	1.28324	1.49754	3.3655	1.04737		14	14	12	14	50.6	33.978	326	0	80.715	By MS/MS	By MS/MS	393280000	76790000	316490000	47229000	106140000
294	gi|872588092;gi|868878814;gi|960385023;gi|960382259;gi|949486414	gi|872588092;gi|868878814	ABC transporter substrate-binding protein [Marinovum algicola];ABC-type sugar transport system, periplasmic component (plasmid) [Marinovum algicola DG 898]	5	23.2886	24.006	1.11925	1.15543	0.324881	0.534186	1.03233		8	8	8	5	38.1	47.299	436	0	80.066	By MS/MS	By MS/MS	71909000	10178000	61730000	10246000	16847000
310	gi|872596109;gi|868879550	gi|872596109;gi|868879550	aldose sugar dehydrogenase [Marinovum algicola];Glucose/sorbosone dehydrogenase (plasmid) [Marinovum algicola DG 898]	2	25.4782	25.5593	1.22449	1.2302	1.48204	1.56774	1.00466		11	11	9	10	37.8	45.458	423	0	79.074	By MS/MS	By MS/MS	259800000	66461000	193340000	46740000	49443000
203	gi|872576393;gi|868877345;gi|960386565;gi|960381242;gi|949484462	gi|872576393;gi|868877345	dihydrolipoyl dehydrogenase [Marinovum algicola];dihydrolipoamide dehydrogenase [Marinovum algicola DG 898]	5	23.4116	22.9227	1.12517	1.10329	0.353799	0.252102	0.980559		10	10	8	9	32.5	48.975	464	0	73.413	By MS/MS	By MS/MS	44916000	11392000	33524000	11158000	7950700
123	gi|872571186;gi|868876418;gi|960384351;gi|960380609;gi|949487148	gi|872571186;gi|868876418	peptide ABC transporter substrate-binding protein [Marinovum algicola];ABC-type dipeptide transport system, periplasmic component [Marinovum algicola DG 898]	5	24.9376	24.4106	1.19851	1.17491	1.01891	0.707122	0.98031		15	15	12	15	42.4	58.319	526	0	69.037	By MS/MS	By MS/MS	139660000	36005000	103660000	32134000	22301000
127	gi|872571256;gi|868876468	gi|872571256;gi|868876468	C4-dicarboxylate ABC transporter substrate-binding protein [Marinovum algicola];TRAP transporter solute receptor, TAXI family [Marinovum algicola DG 898]	2	24.7364	25.0933	1.18884	1.20777	0.886273	1.13505	1.01592		8	8	5	8	46.7	33.218	319	0	68.494	By MS/MS	By MS/MS	152860000	40896000	111970000	27951000	35797000
207	gi|872576796;gi|868877387;gi|960386581;gi|960381258;gi|949484480	gi|872576796;gi|868877387	acetyl-CoA acetyltransferase [Marinovum algicola];acetyl-CoA acetyltransferase [Marinovum algicola DG 898]	5	23.329	23.4525	1.1212	1.12879	0.334108	0.363977	1.00678		10	10	9	9	43	40.848	391	0	57.89	By MS/MS	By MS/MS	50687000	14974000	35713000	10537000	11479000
94	gi|872566723;gi|868875954	gi|872566723;gi|868875954	aconitate hydratase [Marinovum algicola];aconitate hydratase 1 [Marinovum algicola DG 898]	2	25.1294	25.2819	1.20772	1.21684	1.16375	1.2935	1.00755		22	16	15	15	34.1	100.08	924	0	57.204	By MS/MS	By MS/MS	185670000	39871000	145800000	36702000	40794000
145	gi|872585969;gi|868876656;gi|960385811;gi|960379153;gi|949485897	gi|872585969;gi|868876656	citrate (Si)-synthase [Marinovum algicola];citrate synthase I (hexameric type) [Marinovum algicola DG 898]	5	23.3037	23.6584	1.11998	1.1387	0.328306	0.419815	1.01672		10	10	8	10	29.9	48.182	431	0	56.74	By MS/MS	By MS/MS	57778000	13033000	44745000	10354000	13240000
267	gi|872579806;gi|868878005;gi|960384847;gi|949486642	gi|872579806;gi|868878005	polyribonucleotide nucleotidyltransferase [Marinovum algicola];polyribonucleotide nucleotidyltransferase [Marinovum algicola DG 898]	4	24.6147	24.2626	1.18299	1.16779	0.814581	0.638189	0.987149		15	11	9	10	29.7	77.133	710	0	56.722	By MS/MS	By MS/MS	107540000	33701000	73843000	25690000	20127000
168	gi|872571655;gi|868876858;gi|960385443;gi|960381560;gi|949485422	gi|872571655;gi|868876858	O-acetylhomoserine aminocarboxypropyltransferase [Marinovum algicola];OAH/OAS sulfhydrylase [Marinovum algicola DG 898]	5	22.3766	22.0523	1.07542	1.0614	0.172657	0.137902	0.986961		5	5	4	4	21.9	45.738	430	0	55.263	By MS/MS	By MS/MS	21992000	7527500	14464000	5445200	4349100
119	gi|872571156;gi|868876399	gi|872571156;gi|868876399	elongation factor Ts [Marinovum algicola];translation elongation factor Ts [Marinovum algicola DG 898]	2	23.6047	23.8087	1.13445	1.14594	0.404468	0.465919	1.01013		8	8	4	8	40.9	30.151	291	0	54.462	By MS/MS	By MS/MS	66302000	14978000	51324000	12756000	14694000
163	gi|872571585;gi|868876796	gi|872571585;gi|868876796	HflK protein [Marinovum algicola];HflK protein [Marinovum algicola DG 898]	2	23.0457	22.5778	1.10758	1.0867	0.274541	0.198508	0.981144		8	8	7	8	29.6	41.761	395	0	53.591	By MS/MS	By MS/MS	34223000	10179000	24044000	8658400	6260500
31	gi|868875069	gi|868875069	hypothetical protein MALG_00437 [Marinovum algicola DG 898]	1	26.891	27.7592	1.29239	1.33608	3.94607	7.20313	1.03381		6	6	5	6	94	5.4501	50	0	52.709	By MS/MS	By MS/MS	913520000	151370000	762150000	124450000	227170000
182	gi|872571797;gi|868877014	gi|872571797;gi|868877014	branched-chain amino acid ABC transporter substrate-binding protein [Marinovum algicola];ABC-type branched-chain amino acid transport system, periplasmic component [Marinovum algicola DG 898]	2	24.9556	22.8637	1.19937	1.10046	1.03169	0.242015	0.917528		9	9	8	5	36.4	47.307	448	0	52.203	By MS/MS	By MS/MS	75897000	50952000	24944000	32537000	7632600
8	gi|872556526;gi|868874686;gi|960384393;gi|960379384;gi|949486950	gi|872556526;gi|868874686	isocitrate dehydrogenase [Marinovum algicola];isocitrate dehydrogenase, NADP-dependent, monomeric type [Marinovum algicola DG 898]	5	24.9885	24.4308	1.20096	1.17588	1.05553	0.71711	0.979123		18	18	15	16	38.3	79.274	737	0	50.799	By MS/MS	By MS/MS	122220000	39417000	82803000	33289000	22616000
217	gi|872578869;gi|868877533;gi|949487344	gi|872578869;gi|868877533	50S ribosomal protein L2 [Marinovum algicola];ribosomal protein L2, bacterial/organellar [Marinovum algicola DG 898]	3	23.4541	21.1981	1.12721	1.02029	0.364389	0.0762865	0.905145		5	5	4	3	25.7	30.487	280	0	50.466	By MS/MS	By MS/MS	23555000	16360000	7194800	11492000	2405900
225	gi|872578969;gi|868877546;gi|960387594;gi|960379881;gi|118201852	gi|872578969;gi|868877546	DNA-directed RNA polymerase subunit beta [Marinovum algicola];DNA-directed RNA polymerase, beta subunit [Marinovum algicola DG 898]	5	23.3499	23.3272	1.1222	1.12276	0.338991	0.333696	1.0005		16	16	13	14	15.7	153.51	1378	0	47.378	By MS/MS	By MS/MS	44723000	14031000	30692000	10691000	10524000
270	gi|872579816;gi|868878015	gi|872579816;gi|868878015	peptide ABC transporter substrate-binding protein [Marinovum algicola];ABC-type dipeptide transport system, periplasmic component [Marinovum algicola DG 898]	2	24.1796	24.6411	1.16208	1.186	0.602517	0.829642	1.02059		10	10	10	9	34.2	59.135	535	0	44.997	By MS/MS	By MS/MS	128180000	27578000	100600000	19002000	26165000
303	gi|872593271;gi|868879369	gi|872593271;gi|868879369	nitrate ABC transporter substrate-binding protein [Marinovum algicola];Pyrimidine ABC transporter, substrate-binding protein component (plasmid) [Marinovum algicola DG 898]	2	24.4755	24.3855	1.1763	1.1737	0.739655	0.694946	0.997793		8	6	6	5	41.5	35.866	330	0	44.725	By MS/MS	By MS/MS	118450000	31857000	86594000	23327000	21917000
315	gi|872596322;gi|868879634	gi|872596322;gi|868879634	ABC transporter substrate-binding protein [Marinovum algicola];ABC-type sugar transport system, periplasmic component (plasmid) [Marinovum algicola DG 898]	2	24.1045	24.9829	1.15847	1.20245	0.571919	1.05138	1.03797		6	6	5	6	27.9	44.419	419	0	42.979	By MS/MS	By MS/MS	141330000	34846000	106480000	18037000	33158000
268	gi|872579809;gi|868878008	gi|872579809;gi|868878008	peroxidase [Marinovum algicola];Peroxiredoxin [Marinovum algicola DG 898]	2	24.1531	25.0408	1.1608	1.20524	0.591514	1.09447	1.03828		12	12	11	10	70	23.734	217	0	41.599	By MS/MS	By MS/MS	145740000	27539000	118200000	18655000	34517000
297	gi|872588291;gi|868878944	gi|872588291;gi|868878944	peptide ABC transporter substrate-binding protein [Marinovum algicola];ABC-type dipeptide transport system, periplasmic component (plasmid) [Marinovum algicola DG 898]	2	22.8333	22.0998	1.09737	1.06369	0.236958	0.142515	0.969302		6	6	6	5	19.1	57.761	529	0	39.873	By MS/MS	By MS/MS	24281000	10892000	13388000	7473100	4494600
30	gi|872560137;gi|868875068	gi|872560137;gi|868875068	hypothetical protein [Marinovum algicola];hypothetical protein MALG_00436 [Marinovum algicola DG 898]	2	21.2734	22.5988	1.02241	1.08771	0.0803737	0.201419	1.06387		2	2	1	2	16.9	21.992	243	0	37.439	By MS/MS	By MS/MS	21944000	3264300	18680000	2534800	6352300
157	gi|872571536;gi|868876745;gi|960385270;gi|960381711;gi|949485195	gi|872571536;gi|868876745	50S ribosomal protein L9 [Marinovum algicola];ribosomal protein L9 [Marinovum algicola DG 898]	5	22.9483	23.5663	1.1029	1.13427	0.25662	0.393846	1.02844		6	6	6	6	30.5	22.801	210	0	36.789	By MS/MS	By MS/MS	48453000	10064000	38389000	8093200	12421000
179	gi|872571762;gi|868876976	gi|872571762;gi|868876976	hypothetical protein [Marinovum algicola];Bacterial SH3 domain protein/Protein of unknown function [Marinovum algicola DG 898]	2	21.2057	22.559	1.01915	1.08579	0.076686	0.195931	1.06539		2	2	2	2	14.4	22.22	215	0	35.304	By MS/MS	By MS/MS	25050000	2535300	22514000	2418500	6179200
27	gi|872559852;gi|868875046;gi|960386671;gi|960381379;gi|949484423	gi|872559852;gi|868875046	BMP family ABC transporter substrate-binding protein [Marinovum algicola];putative ABC-type transport system, periplasmic component/surface lipoprotein [Marinovum algicola DG 898]	5	23.9056	23.268	1.14891	1.11991	0.498293	0.320283	0.974761		8	8	6	8	28.7	34.862	331	0	35.125	By MS/MS	By MS/MS	63557000	19466000	44091000	15715000	10101000
248	gi|872579531;gi|868877755;gi|960382803;gi|960387000;gi|949484012	gi|872579531;gi|868877755	molecular chaperone DnaK [Marinovum algicola];chaperone protein DnaK [Marinovum algicola DG 898]	5	23.073	21.6497	1.10889	1.04203	0.279789	0.104326	0.939699		8	8	7	7	17.4	69.07	638	0	34.187	By MS/MS	By MS/MS	21731000	11559000	10173000	8823900	3290200
170	gi|872571669;gi|868876872;gi|960385575;gi|960378880;gi|949485592	gi|872571669;gi|868876872	carbon monoxide dehydrogenase [Marinovum algicola];Aerobic-type carbon monoxide dehydrogenase, large subunit CoxL/CutL-like protein [Marinovum algicola DG 898]	5	24.2055	22.5169	1.16332	1.08376	0.613393	0.190296	0.931611		13	13	12	7	28	84.788	792	0	34.176	By MS/MS	By MS/MS	44315000	31872000	12443000	19345000	6001500
159	gi|921086106;gi|868876774	gi|921086106;gi|868876774	hypothetical protein [Marinovum algicola];Subtilisin-like serine protease [Marinovum algicola DG 898]	2	22.43	23.8636	1.07799	1.14858	0.179179	0.483992	1.06548		6	6	5	5	26.9	46.313	446	0	33.272	By MS/MS	By MS/MS	57042000	5789500	51253000	5650900	15264000
161	gi|872571582;gi|868876793;gi|960383859;gi|960382544;gi|949487607	gi|872571582;gi|868876793	serine protease [Marinovum algicola];periplasmic serine protease, Do/DeqQ family [Marinovum algicola DG 898]	5	23.781	22.9304	1.14292	1.10367	0.45704	0.253459	0.965654		10	10	8	10	28.5	52.373	495	0	31.379	By MS/MS	By MS/MS	46473000	20030000	26443000	14414000	7993500
191	gi|872574701;gi|868877216	gi|872574701;gi|868877216	5-nucleotidase [Marinovum algicola];5-nucleotidase/2,3-cyclic phosphodiesterase [Marinovum algicola DG 898]	2	22.7159	22.8982	1.09173	1.10212	0.21844	0.247872	1.00951		9	9	6	8	34.3	54.855	519	0	31.022	By MS/MS	By MS/MS	40179000	6881100	33298000	6889100	7817300
10	gi|872556589;gi|868874696;gi|960384108;gi|949487313;gi|960379839	gi|872556589;gi|868874696;gi|960384108;gi|949487313;gi|960379839	urea ABC transporter substrate-binding protein [Marinovum algicola];urea ABC transporter, urea binding protein [Marinovum algicola DG 898];urea ABC transporter substrate-binding protein [Ruegeria atlantica];Aliphatic amidase expression-regulating protein [	5	24.4406	25.3874	1.17462	1.22192	0.721993	1.39167	1.04027		6	6	4	6	29.7	46.389	428	0	31.014	By MS/MS	By MS/MS	163520000	32625000	130890000	22770000	43890000
82	gi|872563549;gi|868875752	gi|872563549;gi|868875752	LacI family transcriptional regulator [Marinovum algicola];ABC-type sugar transport system, periplasmic component [Marinovum algicola DG 898]	2	23.4655	23.7207	1.12776	1.1417	0.367275	0.438333	1.01236		6	6	5	5	47.1	31.043	306	0	29.983	By MS/MS	By MS/MS	66664000	18158000	48507000	11583000	13824000
108	gi|872568391;gi|868876125	gi|872568391;gi|868876125	type I glutamate--ammonia ligase [Marinovum algicola];glutamine synthetase, type I [Marinovum algicola DG 898]	2	26.2077	25.8492	1.25955	1.24415	2.45741	1.91666	0.987773		13	10	8	10	31.8	52.465	468	0	29.417	By MS/MS	By MS/MS	335070000	90852000	244220000	77501000	60447000
171	gi|872571670;gi|868876873	gi|872571670;gi|868876873	carbon monoxide dehydrogenase [Marinovum algicola];Aerobic-type carbon monoxide dehydrogenase, small subunit CoxS/CutS-like protein [Marinovum algicola DG 898]	2	22.5219	20.1467	1.08241	0.969682	0.190952	0.0368068	0.895858		4	4	4	3	29.2	16.724	161	0	29.071	By MS/MS	By MS/MS	12611000	9493600	3117100	6022200	1160800
224	gi|872578968;gi|868877545;gi|960379880	gi|872578968;gi|868877545	DNA-directed RNA polymerase subunit beta [Marinovum algicola];DNA-directed RNA polymerase, beta subunit, predominant form [Marinovum algicola DG 898]	3	21.9284	21.1147	1.05388	1.01627	0.126553	0.0719996	0.964313		8	8	6	6	8.1	156.27	1412	0	29.039	By MS/MS	By MS/MS	11419000	5463700	5955400	3991200	2270700
233	gi|872579393;gi|868877640	gi|872579393;gi|868877640	ubiquinol-cytochrome c reductase iron-sulfur subunit [Marinovum algicola];ubiquinol-cytochrome c reductase, iron-sulfur subunit [Marinovum algicola DG 898]	2	22.8436	22.0054	1.09787	1.05914	0.23866	0.133488	0.964725		4	4	4	4	27.8	20.022	187	0	28.208	By MS/MS	By MS/MS	24361000	8343100	16018000	7526800	4209900
19	gi|872557729;gi|868874848	gi|872557729;gi|868874848	2-hydroxyhepta-2,4-diene-1,7-dioate isomerase [Marinovum algicola];2-keto-4-pentenoate hydratase/2-oxohepta-3-ene-1,7-dioic acid hydratase (catechol pathway) [Marinovum algicola DG 898]	2	20.6319	22.11	0.991575	1.06418	0.0515225	0.14353	1.07322		3	3	3	3	19.4	29.569	279	0	28.195	By MS/MS	By MS/MS	15549000	1874200	13675000	1624900	4526600
198	gi|872576293;gi|868877338;gi|960381232;gi|949484452	gi|872576293;gi|868877338	malate dehydrogenase [Marinovum algicola];malate dehydrogenase, NAD-dependent [Marinovum algicola DG 898]	4	22.2081	22.824	1.06733	1.09854	0.153629	0.235439	1.02925		5	5	5	5	21.2	33.637	320	0	27.892	By MS/MS	By MS/MS	28562000	6949200	21613000	4845100	7425200
164	gi|872571586;gi|868876797	gi|872571586;gi|868876797	glutathione-disulfide reductase [Marinovum algicola];glutathione-disulfide reductase, plant [Marinovum algicola DG 898]	2	21.3872	22.1003	1.02788	1.06371	0.0869689	0.142572	1.03487		6	6	6	5	22.8	49.025	452	0	27.85	By MS/MS	By MS/MS	18021000	3772500	14248000	2742800	4496400
230	gi|872579317;gi|868877572;gi|960387239;gi|960380862;gi|949483709	gi|872579317;gi|868877572	30S ribosomal protein S1 [Marinovum algicola];ribosomal protein S1 [Marinovum algicola DG 898]	5	23.247	23.0199	1.11726	1.10798	0.315654	0.26969	0.991693		10	10	9	7	30.4	61.409	559	0	27.54	By MS/MS	By MS/MS	41451000	15079000	26372000	9955000	8505400
279	gi|872581884;gi|868878146	gi|872581884;gi|868878146	argininosuccinate synthase [Marinovum algicola];argininosuccinate synthase [Marinovum algicola DG 898]	2	22.352	22.3151	1.07424	1.07405	0.16974	0.165462	0.999824		7	7	6	5	20.9	45.06	406	0	27.515	By MS/MS	By MS/MS	23956000	7419700	16537000	5353200	5218300
117	gi|872571141;gi|868876389	gi|872571141;gi|868876389	phosphate ABC transporter substrate-binding protein [Marinovum algicola];ABC-type phosphate transport system, periplasmic component [Marinovum algicola DG 898]	2	21.7359	19.5624	1.04463	0.941561	0.110747	0.0245497	0.901331		4	4	4	1	22.4	34.289	326	0	26.174	By MS/MS	By MS/MS	6819900	4529500	2290400	3492700	774240
186	gi|868877136;gi|872573040	gi|868877136;gi|872573040	acetate--CoA ligase [Marinovum algicola DG 898];acetyl-coenzyme A synthetase [Marinovum algicola]	2	23.2968	22.595	1.11965	1.08752	0.326752	0.20089	0.971306		13	10	9	7	33.3	70.795	643	0	25.458	By MS/MS	By MS/MS	35657000	14762000	20895000	10305000	6335600
134	gi|872571345;gi|868876548	gi|872571345;gi|868876548	transketolase [Marinovum algicola];transketolase [Marinovum algicola DG 898]	2	23.2763	22.9092	1.11866	1.10264	0.322122	0.249758	0.98568		11	11	9	10	25.4	72.542	673	0	24.914	By MS/MS	By MS/MS	39750000	12008000	27742000	10159000	7876800
199	gi|872576294;gi|868877339;gi|960386556;gi|949484453;gi|960381233	gi|872576294;gi|868877339	succinate--CoA ligase subunit beta [Marinovum algicola];succinyl-CoA synthetase, beta subunit [Marinovum algicola DG 898]	5	24.2919	24.8674	1.16748	1.1969	0.651284	0.970521	1.0252		14	14	11	13	42.3	42.655	397	0	24.452	By MS/MS	By MS/MS	122010000	25182000	96828000	20540000	30608000
50	gi|872562165;gi|868875204	gi|872562165;gi|868875204	2-isopropylmalate synthase [Marinovum algicola];hypothetical protein MALG_00574 [Marinovum algicola DG 898]	2	20.8385	20.5848	1.00151	0.99077	0.0594558	0.0498673	0.98928		7	7	5	7	24.1	52.383	485	0	24.28	By MS/MS	By MS/MS	6686100	1662800	5023300	1875100	1572700
339	gi|960384705;gi|949486468	gi|960384705;gi|949486468	succinyl-CoA--3-ketoacid-CoA transferase [Ruegeria atlantica];putative succinyl-CoA:3-ketoacid coenzyme A transferase subunit B [Ruegeria atlantica]	2	21.0634	21.1257	1.01231	1.0168	0.0694819	0.0725481	1.00444		1	1	1	1	7.7	22.242	208	0	24.168	By MS/MS	By MS/MS	11298000	3201600	8096300	2191300	2288000
129	gi|872571274;gi|868876482	gi|872571274;gi|868876482	hypothetical protein [Marinovum algicola];hypothetical protein MALG_01876 [Marinovum algicola DG 898]	2	22.3837	24.0346	1.07577	1.15681	0.173516	0.544904	1.07534		3	3	3	3	35	18.866	177	0	23.82	By MS/MS	By MS/MS	70072000	11124000	58949000	5472300	17185000
324	gi|872587310;gi|868877534	gi|872587310;gi|868877534	photosystem reaction center subunit H [Marinovum algicola];PRC-barrel domain protein [Marinovum algicola DG 898]	2	20.2333	22.2272	0.972416	1.06982	0.0390834	0.155677	1.10017		3	3	2	3	43.4	15.133	136	0	22.891	By MS/MS	By MS/MS	19238000	1838400	17400000	1232600	4909700
177	gi|872571728;gi|868876939	gi|872571728;gi|868876939	peroxiredoxin OsmC [Marinovum algicola];peroxiredoxin, OsmC subfamily [Marinovum algicola DG 898]	2	24.6639	25.2217	1.18536	1.21395	0.842864	1.24064	1.02412		10	10	8	10	50.4	14.509	141	0	22.501	By MS/MS	By MS/MS	164470000	37188000	127280000	26582000	39127000
65	gi|872584493;gi|868875398	gi|872584493;gi|868875398	sugar ABC transporter substrate-binding protein [Marinovum algicola];Glycerol-3-phosphate ABC transporter, periplasmic glycerol-3-phosphate-binding protein [Marinovum algicola DG 898]	2	21.183	22.1087	1.01806	1.06411	0.0754874	0.143397	1.04524		7	7	4	7	26.4	44.017	413	0	22.193	By MS/MS	By MS/MS	16131000	3442100	12689000	2380700	4522400
220	gi|872587337;gi|868877537	gi|872587337;gi|868877537	50S ribosomal protein L3 [Marinovum algicola];50S ribosomal protein L3, bacterial [Marinovum algicola DG 898]	2	23.3461	23.2494	1.12202	1.11902	0.338103	0.316184	0.997326		8	8	6	8	40.1	29.271	279	0	21.381	By MS/MS	By MS/MS	43849000	14148000	29700000	10663000	9971700
116	gi|872571127;gi|868876378	gi|872571127;gi|868876378	branched-chain amino acid ABC transporter substrate-binding protein [Marinovum algicola];ABC-type branched-chain amino acid transport system, periplasmic component [Marinovum algicola DG 898]	2	23.1487	22.4547	1.11253	1.08077	0.294857	0.182264	0.97145		4	4	4	4	12.6	40.006	398	0	20.863	By MS/MS	By MS/MS	27005000	14378000	12626000	9299100	5748200
212	gi|872578001;gi|868877470	gi|872578001;gi|868877470	cell envelope biogenesis protein OmpA [Marinovum algicola];Outer membrane protein [Marinovum algicola DG 898]	2	21.3244	21.4519	1.02486	1.0325	0.0832623	0.0909547	1.00746		3	3	3	2	32.3	21.13	198	0	20.45	By MS/MS	By MS/MS	12001000	3842900	8158200	2625900	2868500
231	gi|872579362;gi|868877612;gi|872587750;gi|868878592	gi|872579362;gi|868877612	sugar ABC transporter [Marinovum algicola];ABC-type sugar transport system, periplasmic component [Marinovum algicola DG 898]	4	21.7177	21.9413	1.04376	1.05606	0.109361	0.127688	1.01178		3	3	3	3	11.8	35.094	339	0	20.417	By MS/MS	By MS/MS	18209000	4402100	13807000	3449000	4027000
208	gi|872576798;gi|868877388;gi|960381259;gi|960381778;gi|960386582;gi|949484481	gi|872576798;gi|868877388;gi|960381259	beta-ketoacyl-ACP reductase [Marinovum algicola];acetoacetyl-CoA reductase of ethylmalonyl-CoA pathway [Marinovum algicola DG 898];beta-ketoacyl-ACP reductase [Ruegeria atlantica]	6	24.4709	23.707	1.17608	1.14105	0.737308	0.434211	0.970212		9	9	9	8	49.6	25.292	240	0	20.005	By MS/MS	By MS/MS	73220000	31751000	41469000	23253000	13694000
130	gi|872571276;gi|868876483	gi|872571276;gi|868876483	hypothetical protein [Marinovum algicola];Secreted and surface protein [Marinovum algicola DG 898]	2	22.7635	23.4564	1.09402	1.12898	0.225768	0.36496	1.03196		6	6	5	6	39.2	38.414	370	0	19.979	By MS/MS	By MS/MS	44387000	11802000	32586000	7120200	11510000
246	gi|872579517;gi|868877742	gi|872579517;gi|868877742	xanthine dehydrogenase [Marinovum algicola];Aerobic-type carbon monoxide dehydrogenase, large subunit CoxL/CutL-like protein [Marinovum algicola DG 898]	2	22.1087	22.3342	1.06255	1.07497	0.143397	0.167666	1.01169		10	10	8	9	19.2	82.497	765	0	19.714	By MS/MS	By MS/MS	21929000	5621300	16307000	4522400	5287800
309	gi|872596086;gi|868879548	gi|872596086;gi|868879548	ABC transporter substrate-binding protein [Marinovum algicola];ABC-type branched-chain amino acid transport system, periplasmic component (plasmid) [Marinovum algicola DG 898]	2	22.0622	22.0238	1.06032	1.06003	0.138853	0.135203	0.99973		5	5	4	5	16.7	40.148	378	0	19.355	By MS/MS	By MS/MS	18917000	4921200	13996000	4379100	4264000
200	gi|872576383;gi|868877340;gi|960386558;gi|960381235;gi|949484455	gi|872576383;gi|868877340	succinate--CoA ligase subunit alpha [Marinovum algicola];succinyl-CoA synthetase, alpha subunit [Marinovum algicola DG 898]	5	25.0247	24.2159	1.20269	1.16554	1.08229	0.617864	0.969109		12	12	11	12	52.2	30.554	295	0	19.171	By MS/MS	By MS/MS	111510000	41917000	69593000	34133000	19486000
122	gi|872571183;gi|868876416	gi|872571183;gi|868876416	ABC transporter substrate-binding protein [Marinovum algicola];ABC-type dipeptide transport system, periplasmic component [Marinovum algicola DG 898]	2	21.6714	22.4435	1.04153	1.08023	0.105905	0.180857	1.03715		3	3	3	3	8.3	56.765	521	0	18.779	By MS/MS	By MS/MS	22614000	4162600	18452000	3340000	5703800
197	gi|872576199;gi|868877329;gi|960386550;gi|960381225;gi|949484442	gi|872576199;gi|868877329;gi|960386550;gi|960381225;gi|949484442	succinate dehydrogenase flavoprotein subunit [Marinovum algicola];succinate dehydrogenase, flavoprotein subunit [Marinovum algicola DG 898];succinate dehydrogenase flavoprotein subunit [Ruegeria atlantica];succinate dehydrogenase flavoprotein subunit [Rueg	5	22.2161	22.9998	1.06771	1.10701	0.154482	0.265948	1.0368		9	9	8	9	19.8	65.211	602	0	18.079	By MS/MS	By MS/MS	31582000	4639600	26942000	4872000	8387400
169	gi|872571668;gi|868876871	gi|872571668;gi|868876871	carbon monoxide dehydrogenase [Marinovum algicola];Aerobic-type carbon monoxide dehydrogenase, middle subunit CoxM/CutM-like protein [Marinovum algicola DG 898]	2	24.4223	22.5024	1.17374	1.08307	0.712893	0.188397	0.922745		8	8	7	6	37	26.93	262	0	17.679	By MS/MS	By MS/MS	49390000	29327000	20063000	22483000	5941600
222	gi|872578912;gi|868877540;gi|960379877	gi|872578912;gi|868877540	elongation factor G [Marinovum algicola];translation elongation factor EF-G [Marinovum algicola DG 898]	3	23.5847	23.5824	1.13349	1.13505	0.398919	0.398285	1.00138		11	11	10	10	23.1	77.675	705	0	17.521	By MS/MS	By MS/MS	59151000	13510000	45642000	12581000	12561000
100	gi|872567253;gi|868876010	gi|872567253;gi|868876010	leucyl aminopeptidase [Marinovum algicola];Leucyl aminopeptidase [Marinovum algicola DG 898]	2	20.2687	18.8808	0.974117	0.908753	0.0400537	0.0153058	0.9329		3	3	2	2	9.6	51.756	491	0	17.115	By MS/MS	By MS/MS	2643900	1430100	1213800	1263200	482710
114	gi|872571111;gi|868876366;gi|960385662;gi|960378971;gi|949485700	gi|872571111;gi|868876366	outer membrane protein assembly factor BamA [Marinovum algicola];outer membrane protein assembly complex, YaeT protein [Marinovum algicola DG 898]	5	22.3011	22.6863	1.0718	1.09191	0.163864	0.214001	1.01877		7	7	6	7	13.6	86.281	785	0	17.018	By MS/MS	By MS/MS	27352000	7152200	20200000	5167900	6749100
101	gi|872567339;gi|868876017	gi|872567339;gi|868876017	nucleoside-diphosphate kinase [Marinovum algicola];Nucleoside diphosphate kinase [Marinovum algicola DG 898]	2	20.4959	21.4297	0.985038	1.03144	0.0468868	0.089569	1.0471		2	2	2	2	13.6	15.156	140	0	16.954	By MS/MS	By MS/MS	9709000	3156900	6552100	1478700	2824800
328	gi|960386981;gi|960382784;gi|949483988	gi|960386981;gi|960382784;gi|949483988	ABC transporter permease [Ruegeria atlantica];ABC transporter permease [Ruegeria atlantica];hypothetical protein RUA4292_04067 [Ruegeria atlantica]	3	18.6574	19.2125	0.896677	0.924716	0.0131097	0.0192617	1.03127		1	1	1	1	3.5	46.018	426	0	16.761	By MS/MS	By MS/MS	2314500	338370	1976200	413450	607470
33	gi|868875085;gi|949487355	gi|868875085;gi|949487355	ribosomal protein L14, bacterial/organelle [Marinovum algicola DG 898];hypothetical protein RUA4292_00515 [Ruegeria atlantica]	2	22.3168	22.1005	1.07255	1.06372	0.165646	0.142588	0.99177		2	2	2	2	20.5	13.369	122	0	16.722	By MS/MS	By MS/MS	20652000	7059900	13592000	5224100	4496900
25	gi|872559444;gi|868875011;gi|872587560;gi|868878438	gi|872559444;gi|868875011;gi|872587560;gi|868878438	electron transfer flavoprotein subunit beta [Marinovum algicola];Electron transfer flavoprotein, alpha subunit [Marinovum algicola DG 898];electron transfer flavoprotein subunit beta [Marinovum algicola];Electron transfer flavoprotein, alpha subunit (plasm	4	21.3198	21.4205	1.02463	1.03099	0.0829959	0.0890014	1.00621		2	2	2	1	16.9	31.331	308	0	16.648	By MS/MS	By MS/MS	10352000	3961900	6390000	2617500	2806900
91	gi|872566543;gi|868875929	gi|872566543;gi|868875929	superoxide dismutase [Marinovum algicola];Superoxide dismutase [Marinovum algicola DG 898]	2	24.8668	26.7341	1.19511	1.28674	0.970141	3.53957	1.07668		7	7	6	7	42.1	22.549	202	0	16.304	By MS/MS	By MS/MS	395710000	47691000	348020000	30596000	111630000
262	gi|872579693;gi|868877902	gi|872579693;gi|868877902	peptidase S41 [Marinovum algicola];peptidase (prc) [Marinovum algicola DG 898]	2	22.0722	21.7775	1.06079	1.04817	0.139817	0.113984	0.988103		6	6	6	4	20.7	47.411	444	0	16.112	By MS/MS	By MS/MS	17239000	5462900	11776000	4409500	3594800
37	gi|872560448;gi|868875090;gi|960383943;gi|960379774;gi|949487360	gi|872560448;gi|868875090	50S ribosomal protein L6 [Marinovum algicola];ribosomal protein L6, bacterial type [Marinovum algicola DG 898]	5	21.205	22.7848	1.01912	1.09666	0.076648	0.229123	1.07609		5	5	5	2	42.4	19.194	177	0	16.037	By MS/MS	By MS/MS	17954000	8715700	9238500	2417300	7226000
202	gi|872576390;gi|868877342;gi|960386562;gi|960381239;gi|949484459	gi|872576390;gi|868877342	dihydrolipoamide succinyltransferase [Marinovum algicola];2-oxoglutarate dehydrogenase complex dihydrolipoamide succinyltransferase (E2 component) [Marinovum algicola DG 898]	5	21.2331	21.9581	1.02047	1.05687	0.0781573	0.129185	1.03567		7	7	6	6	23.3	54.377	516	0	15.422	By MS/MS	By MS/MS	16129000	3427400	12702000	2464900	4074200
219	gi|872578889;gi|868877536	gi|872578889;gi|868877536	50S ribosomal protein L4 [Marinovum algicola];50S ribosomal protein L4, bacterial/organelle [Marinovum algicola DG 898]	2	22.7642	20.9095	1.09405	1.0064	0.225876	0.0624554	0.919882		3	3	2	3	27.8	22.163	205	0	15.012	By MS/MS	By MS/MS	16910000	9813000	7097300	7123600	1969700
318	gi|872596351;gi|868879653	gi|872596351;gi|868879653	ABC transporter substrate-binding protein [Marinovum algicola];Maltose/maltodextrin ABC transporter, substrate binding protein periplasmic protein MalE (plasmid) [Marinovum algicola DG 898]	2	20.7512	21.0366	0.997306	1.01252	0.0559616	0.0682073	1.01525		3	3	2	3	9.7	42.362	402	0	14.946	By MS/MS	By MS/MS	10033000	1671000	8362500	1764900	2151100
215	gi|872578799;gi|868877530	gi|872578799;gi|868877530	30S ribosomal protein S3 [Marinovum algicola];ribosomal protein S3, bacterial type [Marinovum algicola DG 898]	2	23.5381	22.1416	1.13125	1.0657	0.386236	0.146713	0.942058		5	2	1	2	18.6	26.733	236	0	14.683	By MS/MS	By MS/MS	28330000	17953000	10376000	12181000	4627000
142	gi|872571419;gi|868876621;gi|960385586;gi|960378892;gi|949485608	gi|872571419;gi|868876621	C4-dicarboxylate ABC transporter [Marinovum algicola];tripartite ATP-independent periplasmic transporter solute receptor, DctP family [Marinovum algicola DG 898]	5	22.2497	22.8495	1.06933	1.09977	0.158128	0.239637	1.02847		6	6	5	4	33.1	36.9	335	0	14.591	By MS/MS	By MS/MS	28253000	6292600	21960000	4987000	7557600
57	gi|872562332;gi|868875276;gi|960383223;gi|949487767	gi|872562332;gi|868875276	molecular chaperone GroES [Marinovum algicola];Co-chaperonin GroES (HSP10) [Marinovum algicola DG 898]	4	23.7214	23.7418	1.14006	1.14272	0.438555	0.444801	1.00234		7	7	6	5	78.9	10.266	95	0	14.529	By MS/MS	By MS/MS	60519000	19878000	40642000	13831000	14028000
241	gi|872579486;gi|868877710	gi|872579486;gi|868877710	aspartate-semialdehyde dehydrogenase [Marinovum algicola];aspartate-semialdehyde dehydrogenase (peptidoglycan organisms) [Marinovum algicola DG 898]	2	23.0372	23.2189	1.10717	1.11755	0.272937	0.309576	1.00937		9	9	8	8	38.8	37.283	340	0	14.227	By MS/MS	By MS/MS	42910000	10955000	31955000	8607800	9763300
240	gi|872579477;gi|868877702	gi|872579477;gi|868877702	hypothetical protein [Marinovum algicola];hypothetical protein MALG_03122 [Marinovum algicola DG 898]	2	23.812	22.4021	1.14441	1.07824	0.466965	0.175736	0.942177		3	3	2	2	28.3	35.167	350	0	14.186	By MS/MS	By MS/MS	70824000	22194000	48630000	14727000	5542300
156	gi|872571535;gi|868876743	gi|872571535;gi|868876743	30S ribosomal protein S6 [Marinovum algicola];ribosomal protein S6 [Marinovum algicola DG 898]	2	23.4747	22.9285	1.1282	1.10358	0.369621	0.253132	0.978174		5	5	4	4	61	13.91	118	0	13.805	By MS/MS	By MS/MS	47947000	21368000	26579000	11657000	7983200
13	gi|872557076;gi|868874765	gi|872557076;gi|868874765	phosphoglycerate dehydrogenase [Marinovum algicola];D-3-phosphoglycerate dehydrogenase [Marinovum algicola DG 898]	2	21.9122	22.8211	1.05311	1.0984	0.125142	0.23496	1.04301		7	7	7	6	18	56.839	532	0	12.819	By MS/MS	By MS/MS	27638000	6341900	21297000	3946700	7410100
154	gi|872571529;gi|868876738	gi|872571529;gi|868876738	beta-ketoacyl-[acyl-carrier-protein] synthase II [Marinovum algicola];beta-ketoacyl-acyl-carrier-protein synthase II [Marinovum algicola DG 898]	2	20.6996	20.0208	0.994826	0.963623	0.0539957	0.0337311	0.968634		2	2	2	2	12.9	43.547	418	0	12.819	By MS/MS	By MS/MS	6397700	2712100	3685600	1702900	1063800
67	gi|872562575;gi|868875408;gi|960381028;gi|949484244	gi|872562575;gi|868875408	50S ribosomal protein L19 [Marinovum algicola];ribosomal protein L19, bacterial type [Marinovum algicola DG 898]	4	23.6961	21.6914	1.13884	1.04403	0.430945	0.107379	0.916745		6	6	5	6	57	14.206	128	0	12.698	By MS/MS	By MS/MS	34122000	17014000	17108000	13591000	3386500
192	gi|872575778;gi|868877286;gi|960386490;gi|960381160;gi|949484370	gi|872575778;gi|868877286;gi|960386490;gi|960381160;gi|949484370	ABC transporter ATP-binding protein [Marinovum algicola];ATP-binding protein cassette protein, ChvD family [Marinovum algicola DG 898];ABC transporter ATP-binding protein [Ruegeria atlantica];ABC transporter ATP-binding protein [Ruegeria atlantica];putativ	5	20.4441	19.8664	0.982551	0.956191	0.0452348	0.0303072	0.973171		2	2	2	2	6.9	61.058	551	0	12.673	By MS/MS	By MS/MS	5388300	1733100	3655200	1426600	955820
46	gi|872561691;gi|868875174	gi|872561691;gi|868875174	succinyl-CoA--3-ketoacid-CoA transferase [Marinovum algicola];3-oxoacid CoA-transferase, B subunit [Marinovum algicola DG 898]	2	21.8912	20.6635	1.05209	0.994559	0.123329	0.052664	0.945313		4	4	3	4	27.1	21.875	207	0	12.605	By MS/MS	By MS/MS	12462000	3784600	8677200	3889500	1660900
227	gi|872579136;gi|868877554;gi|960379885	gi|872579136;gi|868877554	50S ribosomal protein L1 [Marinovum algicola];ribosomal protein L1 [Marinovum algicola DG 898]	3	22.402	20.7816	1.07664	1.00024	0.175726	0.0571538	0.929034		6	6	5	5	37.1	23.988	232	0	12.458	By MS/MS	By MS/MS	15618000	6407500	9210700	5542000	1802500
75	gi|872562968;gi|868875639;gi|960381777	gi|872562968;gi|868875639	pyruvate dehydrogenase (acetyl-transferring), homodimeric type [Marinovum algicola];pyruvate dehydrogenase E1 component, homodimeric type [Marinovum algicola DG 898]	3	22.222	22.0952	1.06799	1.06347	0.155116	0.142065	0.99576		10	10	7	10	12.7	99.524	884	0	12.351	By MS/MS	By MS/MS	20775000	5385600	15390000	4892000	4480400
146	gi|872571465;gi|868876673;gi|960385357;gi|960379264;gi|949485317	gi|872571465;gi|868876673	phosphopyruvate hydratase [Marinovum algicola];phosphopyruvate hydratase [Marinovum algicola DG 898]	5	20.8765	21.4204	1.00333	1.03099	0.0610412	0.0889951	1.02757		5	5	5	5	15.8	45.58	425	0	12.229	By MS/MS	By MS/MS	8865200	2594300	6270900	1925100	2806700
239	gi|872579454;gi|868877688;gi|960380576;gi|949487129	gi|872579454;gi|868877688;gi|960380576;gi|949487129	nitrogen regulatory protein P-II 1 [Marinovum algicola];Nitrogen regulatory protein PII [Marinovum algicola DG 898];transcriptional regulator [Ruegeria atlantica];Nitrogen regulatory protein P-II 1 [Ruegeria atlantica]	4	24.2089	23.4424	1.16349	1.12831	0.614852	0.361441	0.969766		5	5	4	4	48.2	12.055	112	0	12.151	By MS/MS	By MS/MS	67906000	22454000	45451000	19391000	11399000
87	gi|872565705;gi|868875887	gi|872565705;gi|868875887	arabinose dehydrogenase [Marinovum algicola];Zn-dependent alcohol dehydrogenase [Marinovum algicola DG 898]	2	22.9162	22.9308	1.10136	1.10369	0.250979	0.253535	1.00211		6	6	6	5	20.5	37.102	347	0	12.063	By MS/MS	By MS/MS	35567000	11926000	23641000	7915300	7995900
22	gi|872558570;gi|868874933	gi|872558570;gi|868874933	ABC transporter permease [Marinovum algicola];ABC-type branched-chain amino acid transport system, periplasmic component [Marinovum algicola DG 898]	2	19.182	19.7519	0.921891	0.950679	0.018859	0.0279944	1.03123		2	2	1	2	12.3	42.208	391	0	11.977	By matching	By MS/MS	3853300	607400	3245900	594770	882880
298	gi|872588340;gi|868878979	gi|872588340;gi|868878979	ABC transporter substrate-binding protein [Marinovum algicola];TRAP-type mannitol/chloroaromatic compound transport system, periplasmic component (plasmid) [Marinovum algicola DG 898]	2	21.6062	23.3066	1.0384	1.12177	0.101225	0.328971	1.08029		8	8	4	8	37.7	39.023	361	0	11.691	By MS/MS	By MS/MS	38328000	1933800	36395000	3192400	10375000
76	gi|872562970;gi|868875640	gi|872562970;gi|868875640	dihydrolipoyllysine-residue acetyltransferase [Marinovum algicola];pyruvate dehydrogenase complex dihydrolipoamide acetyltransferase, long form [Marinovum algicola DG 898]	2	20.4723	21.1009	0.983904	1.01561	0.0461258	0.0713147	1.03223		3	3	2	3	11.2	45.387	427	0	11.29	By MS/MS	By MS/MS	8928100	894170	8033900	1454700	2249100
181	gi|872571781;gi|868876998;gi|960387371;gi|960382067	gi|872571781;gi|868876998	NAD(P) transhydrogenase subunit alpha [Marinovum algicola];NAD(P) transhydrogenase, alpha subunit [Marinovum algicola DG 898]	4	21.9671	22.4627	1.05574	1.08116	0.129994	0.183282	1.02407		8	8	8	6	19.5	55.849	523	0	11.108	By MS/MS	By MS/MS	22140000	6914500	15225000	4099700	5780300
299	gi|872588382;gi|868879005	gi|872588382;gi|868879005	spermidine/putrescine ABC transporter substrate-binding protein [Marinovum algicola];ABC transporter, periplasmic spermidine putrescine-binding protein PotD (plasmid) [Marinovum algicola DG 898]	2	19.6493	19.188	0.944351	0.923541	0.0260736	0.0189383	0.977964		3	3	2	3	12.5	37.99	353	0	11.103	By MS/MS	By MS/MS	2965600	567330	2398300	822300	597270
77	gi|872562972;gi|868875641;gi|960381775	gi|872562972;gi|868875641	dihydrolipoyl dehydrogenase [Marinovum algicola];dihydrolipoamide dehydrogenase [Marinovum algicola DG 898]	3	22.0748	21.4075	1.06092	1.03037	0.140067	0.0881992	0.971201		7	7	6	5	15	61.587	585	0	10.955	By MS/MS	By MS/MS	13752000	6238100	7513500	4417400	2781600
277	gi|872581041;gi|868878095	gi|872581041;gi|868878095	peptide ABC transporter substrate-binding protein [Marinovum algicola];ABC-type dipeptide transport system, periplasmic component [Marinovum algicola DG 898]	2	22.6189	23.7376	1.08707	1.14252	0.204238	0.443501	1.051		6	6	5	6	14.3	56.462	517	0	10.891	By MS/MS	By MS/MS	50708000	12076000	38632000	6441200	13987000
26	gi|872559453;gi|868875012;gi|960386691;gi|960380947;gi|949484155	gi|872559453;gi|868875012	electron transfer flavoprotein subunit beta [Marinovum algicola];Electron transfer flavoprotein, beta subunit [Marinovum algicola DG 898]	5	21.3766	21.4283	1.02737	1.03137	0.0863316	0.0894834	1.0039		6	6	6	6	29.8	26.893	252	0	10.858	By MS/MS	By MS/MS	11515000	3371000	8143900	2722700	2822100
282	gi|872582257;gi|868878169	gi|872582257;gi|868878169	preprotein translocase subunit Tim44 [Marinovum algicola];hypothetical protein MALG_03591 [Marinovum algicola DG 898]	2	19.7878	19.9816	0.951007	0.961737	0.0287006	0.0328274	1.01128		3	3	2	3	11.9	24.196	219	0	10.832	By MS/MS	By MS/MS	4687300	825260	3862100	905150	1035300
158	gi|872586092;gi|868876748;gi|960385268;gi|960381715;gi|949485190	gi|872586092;gi|868876748	trigger factor [Marinovum algicola];Cell division trigger factor [Marinovum algicola DG 898]	5	21.5417	22.2626	1.0353	1.07152	0.0967953	0.159539	1.03499		4	4	3	4	16.9	49.629	443	0	10.831	By MS/MS	By MS/MS	22245000	2398200	19847000	3052700	5031500
322	gi|872596388;gi|868879688	gi|872596388;gi|868879688	hypothetical protein [Marinovum algicola];hypothetical protein MALG_05045 (plasmid) [Marinovum algicola DG 898]	2	23.1931	22.8059	1.11467	1.09767	0.304084	0.232506	0.984755		1	1	1	1	11.2	10.379	107	0	10.748	By MS/MS	By MS/MS	35098000	13103000	21995000	9590100	7332700
271	gi|872579954;gi|868878022;gi|960384279;gi|960380520;gi|949487067	gi|872579954;gi|868878022	translation initiation factor IF-2 [Marinovum algicola];translation initiation factor IF-2 [Marinovum algicola DG 898]	5	21.302	21.0554	1.02378	1.01342	0.0819813	0.0691014	0.989882		6	6	5	5	10.5	88.503	826	0	10.592	By MS/MS	By MS/MS	9479200	3935900	5543300	2585500	2179300
132	gi|872571319;gi|868876525	gi|872571319;gi|868876525	isocitrate dehydrogenase [Marinovum algicola];isocitrate dehydrogenase, NADP-dependent, eukaryotic type [Marinovum algicola DG 898]	2	21.3126	22.1587	1.02429	1.06652	0.0825837	0.148454	1.04123		5	5	4	5	15.3	45.308	404	0	10.517	By MS/MS	By MS/MS	17297000	3979000	13318000	2604500	4681900
121	gi|872571167;gi|868876405	gi|872571167;gi|868876405	alpha-glucoside ABC transporter substrate-binding protein [Marinovum algicola];ABC-type sugar transport system, periplasmic component [Marinovum algicola DG 898]	2	22.3907	23.276	1.0761	1.1203	0.174356	0.322059	1.04107		4	4	4	4	13.3	48.932	451	0	10.294	By MS/MS	By MS/MS	40823000	5905300	34917000	5498800	10157000
42	gi|872560634;gi|868875103;gi|949487375	gi|872560634;gi|868875103;gi|949487375	30S ribosomal protein S11 [Marinovum algicola];30S ribosomal protein S11 [Marinovum algicola DG 898];hypothetical protein RUA4292_00535 [Ruegeria atlantica]	3	20.8	18.376	0.999654	0.884456	0.0578895	0.0107868	0.884762		3	3	3	3	34.6	13.79	130	0	10.089	By MS/MS	By MS/MS	3745900	2406200	1339700	1825700	340190
306	gi|872593443;gi|868879385	gi|872593443;gi|868879385	formate dehydrogenase [Marinovum algicola];Anaerobic dehydrogenase, typically selenocysteine-containing (plasmid) [Marinovum algicola DG 898]	2	21.1583	21.6362	1.01687	1.04137	0.0742064	0.103349	1.02409		7	7	4	7	10.6	114.26	1034	0	10.021	By MS/MS	By MS/MS	12988000	2729600	10258000	2340300	3259400
165	gi|872571595;gi|868876804;gi|960383868;gi|949487620;gi|960382531	gi|872571595;gi|868876804	adenylosuccinate synthase [Marinovum algicola];adenylosuccinate synthase [Marinovum algicola DG 898]	5	21.737	21.0359	1.04469	1.01248	0.110832	0.0681724	0.969172		5	5	5	5	13.7	46.54	431	0	9.6447	By MS/MS	By MS/MS	10980000	4736300	6244000	3495400	2150000
39	gi|872560466;gi|868875092	gi|872560466;gi|868875092	30S ribosomal protein S5 [Marinovum algicola];ribosomal protein S5, bacterial/organelle type [Marinovum algicola DG 898]	2	22.2835	20.2978	1.07095	0.976956	0.161873	0.0408717	0.912232		5	5	4	4	34.7	20.975	193	0	9.5472	By MS/MS	By MS/MS	10913000	7359300	3553400	5105100	1289000
15	gi|872557321;gi|868874799;gi|960387332;gi|960382021	gi|872557321;gi|868874799	pyruvate carboxylase [Marinovum algicola];pyruvate carboxylase [Marinovum algicola DG 898]	4	21.6381	21.967	1.03993	1.0573	0.103486	0.129987	1.0167		8	8	5	8	9.9	126.28	1148	0	9.4496	By MS/MS	By MS/MS	16683000	4003900	12679000	3263700	4099500
345	gi|960383940;gi|960379767;gi|949487347	gi|960383940;gi|960379767;gi|949487347	30S ribosomal protein S3 [Ruegeria atlantica];30S ribosomal protein S3 [Ruegeria atlantica];hypothetical protein RUA4292_00507 [Ruegeria atlantica]	3	20.8551	20.2627	1.0023	0.975266	0.0601439	0.0398888	0.973025		4	1	1	1	15.3	26.793	236	0	9.4186	By MS/MS	By MS/MS	6161800	2537400	3624400	1896800	1258000
162	gi|872571584;gi|868876795	gi|872571584;gi|868876795	protease modulator HflC [Marinovum algicola];Membrane protease subunit, stomatin/prohibitin-like protein [Marinovum algicola DG 898]	2	21.6638	21.9107	1.04117	1.05459	0.10535	0.125012	1.01289		8	8	5	8	23.8	37.719	344	0	9.4168	By MS/MS	By MS/MS	16892000	3272500	13620000	3322500	3942600
104	gi|872567952;gi|868876080;gi|960385956;gi|960379298;gi|949485671	gi|872567952;gi|868876080	ribonuclease [Marinovum algicola];ribonuclease, Rne/Rng family [Marinovum algicola DG 898]	5	20.171	19.6453	0.969422	0.94555	0.0374314	0.0260013	0.975375		3	3	3	2	6.9	109.87	1010	0	9.117	By MS/MS	By MS/MS	3540800	1793300	1747500	1180500	820020
238	gi|872579428;gi|868877671	gi|872579428;gi|868877671	peroxiredoxin [Marinovum algicola];Peroxiredoxin [Marinovum algicola DG 898]	2	21.6646	22.769	1.04121	1.0959	0.105404	0.22663	1.05253		4	4	3	4	35.2	16.868	162	0	8.7754	By MS/MS	By MS/MS	33363000	4847600	28516000	3324200	7147400
255	gi|872579602;gi|868877820	gi|872579602;gi|868877820	hypothetical protein [Marinovum algicola];Outer membrane protein [Marinovum algicola DG 898]	2	20.4118	21.5729	0.980998	1.03833	0.0442328	0.0989134	1.05844		3	3	2	3	7.9	67.498	635	0	8.7116	By matching	By MS/MS	12132000	1319100	10813000	1395000	3119500
45	gi|872561344;gi|868875147	gi|872561344;gi|868875147	translocation protein TolB [Marinovum algicola];tol-pal system beta propeller repeat protein TolB [Marinovum algicola DG 898]	2	19.3409	19.5223	0.929527	0.939631	0.0210548	0.0238768	1.01087		3	3	3	3	10.8	47.933	444	0	8.6707	By MS/MS	By MS/MS	2534000	801360	1732600	664020	753020
274	gi|872580439;gi|868878056;gi|960384192;gi|960382747;gi|949487215	gi|872580439;gi|868878056	flavocytochrome C [Marinovum algicola];putative NAD(FAD)-dependent dehydrogenase [Marinovum algicola DG 898]	5	20.4793	19.7927	0.984241	0.952643	0.0463509	0.0287976	0.967896		3	3	3	3	9.7	44.228	421	0	8.5398	By MS/MS	By MS/MS	4958200	1668000	3290100	1461800	908210
136	gi|872571353;gi|868876557	gi|872571353;gi|868876557	type I glyceraldehyde-3-phosphate dehydrogenase [Marinovum algicola];glyceraldehyde-3-phosphate dehydrogenase, type I [Marinovum algicola DG 898]	2	21.5747	21.5723	1.03688	1.0383	0.099037	0.0988753	1.00136		5	5	5	5	19.8	35.971	333	0	8.3985	By MS/MS	By MS/MS	14486000	3758000	10728000	3123400	3118300
247	gi|872579521;gi|868877745;gi|960387477;gi|960380008	gi|872579521;gi|868877745;gi|960387477;gi|960380008	2,3,4,5-tetrahydropyridine-2,6-dicarboxylate N-succinyltransferase [Marinovum algicola];2,3,4,5-tetrahydropyridine-2,6-dicarboxylate N-succinyltransferase [Marinovum algicola DG 898];2,3,4,5-tetrahydropyridine-2,6-dicarboxylate N-succinyltransferase [Ruege	4	21.5457	22.0254	1.03549	1.06011	0.097068	0.135352	1.02377		5	5	5	5	18.5	29.599	275	0	8.2672	By MS/MS	By MS/MS	16931000	7001200	9929800	3061300	4268700
36	gi|872560431;gi|868875089;gi|949487359	gi|872560431;gi|868875089	30S ribosomal protein S8 [Marinovum algicola];Ribosomal protein S8 [Marinovum algicola DG 898]	3	22.1516	22.3813	1.06461	1.07724	0.147725	0.173228	1.01186		4	4	4	4	33.8	14.13	130	0	8.1437	By MS/MS	By MS/MS	20487000	5959800	14527000	4658900	5463200
236	gi|872579419;gi|868877662	gi|872579419;gi|868877662	hypothetical protein [Marinovum algicola];CVNH domain protein [Marinovum algicola DG 898]	2	19.0208	19.0578	0.914144	0.917272	0.0168655	0.0173034	1.00342		2	2	1	2	28	13.471	132	0	7.7749	By matching	By MS/MS	2791200	677650	2113600	531900	545710
250	gi|872579547;gi|868877771	gi|872579547;gi|868877771	organic solvent tolerance protein OstA [Marinovum algicola];hypothetical protein MALG_03192 [Marinovum algicola DG 898]	2	18.0171	17.9797	0.865907	0.865382	0.0084112	0.00819591	0.999395		2	2	1	2	16.5	16.956	164	0	7.713	By matching	By MS/MS	1131300	188830	942480	265270	258480
187	gi|872573230;gi|868877143	gi|872573230;gi|868877143	ABC transporter substrate-binding protein [Marinovum algicola];Oligopeptide/dipeptide uptake family ABC transporter, periplasmic substrate-binding protein [Marinovum algicola DG 898]	2	19.8727	20.0956	0.955085	0.967222	0.0304394	0.0355257	1.01271		4	4	3	3	10.8	73.023	647	0	7.3428	By MS/MS	By MS/MS	4779300	1036400	3743000	959990	1120400
201	gi|872576386;gi|868877341;gi|960386561;gi|960381238;gi|949484458	gi|872576386;gi|868877341	2-oxoglutarate dehydrogenase subunit E1 [Marinovum algicola];2-oxoglutarate dehydrogenase, E1 component [Marinovum algicola DG 898]	5	19.8746	20.5969	0.955176	0.99135	0.0304794	0.0502859	1.03787		3	3	3	2	4.8	111.01	990	0	7.1494	By MS/MS	By MS/MS	6080300	1482900	4597500	961250	1585900
258	gi|872579637;gi|868877850	gi|872579637;gi|868877850	spermidine/putrescine ABC transporter substrate-binding protein [Marinovum algicola];Spermidine/putrescine-binding protein periplasmic protein [Marinovum algicola DG 898]	2	20.6601	20.595	0.992932	0.991262	0.0525403	0.0502224	0.998319		2	2	1	2	12.9	41.93	379	0	6.9968	By MS/MS	By MS/MS	9924600	2263400	7661200	1657000	1583900
5	gi|118201776;gi|872556338;gi|868874658	gi|118201776;gi|872556338;gi|868874658	DNA gyrase subunit b, partial [Marinovum algicola];DNA gyrase subunit B [Marinovum algicola];DNA gyrase, B subunit [Marinovum algicola DG 898]	3	16.6432	16.121	0.799874	0.77592	0.00324532	0.00225977	0.970052		1	1	1	1	3.9	40.066	357	0	6.8814	By MS/MS	By matching	302910	102350	200560	102350	71268
185	gi|872572914;gi|868877124;gi|960383579;gi|960381911;gi|949487865	gi|872572914;gi|868877124	acyl-CoA dehydrogenase [Marinovum algicola];Acyl-CoA dehydrogenase [Marinovum algicola DG 898]	5	22.3522	20.602	1.07425	0.991599	0.169768	0.0504666	0.923059		5	5	4	4	12	63.627	591	0	6.7438	By MS/MS	By MS/MS	12980000	6998900	5980800	5354100	1591600
34	gi|872560391;gi|868875086	gi|872560391;gi|868875086	50S ribosomal protein L24 [Marinovum algicola];ribosomal protein L24, bacterial/organelle [Marinovum algicola DG 898]	2	20.4143	20.6532	0.981117	0.994059	0.0443089	0.0522866	1.01319		2	2	2	2	27.2	10.836	103	0	6.4972	By MS/MS	By MS/MS	7003300	2084100	4919100	1397400	1649000
291	gi|872587970;gi|868878733	gi|872587970;gi|868878733	molybdopterin containing oxidoreductase [Marinovum algicola];Sulfite oxidase (plasmid) [Marinovum algicola DG 898]	2	18.8927	18.1204	0.90799	0.872155	0.015433	0.00903554	0.960534		1	1	1	1	3.9	47.429	431	0	6.1363	By MS/MS	By MS/MS	1419900	618020	801920	486720	284960
346	gi|960383955;gi|960379789;gi|949487384	gi|960383955;gi|960379789;gi|949487384	amino acid ABC transporter substrate-binding protein [Ruegeria atlantica];amino acid ABC transporter substrate-binding protein [Ruegeria atlantica];General L-amino acid-binding periplasmic protein AapJ precursor [Ruegeria atlantica]	3	20.3426	21.7628	0.977669	1.04747	0.0421591	0.112827	1.07139		4	2	2	1	18.9	35.557	339	0	6.0545	By MS/MS	By MS/MS	12255000	2505100	9750200	1329600	3558300
183	gi|872571804;gi|868877021;gi|960384781;gi|960379595;gi|949486559	gi|872571804;gi|868877021	acetyl-CoA carboxylase biotin carboxylase subunit [Marinovum algicola];acetyl-CoA carboxylase, biotin carboxylase subunit [Marinovum algicola DG 898]	5	19.7593	20.2008	0.949638	0.972289	0.0281397	0.0382146	1.02385		3	3	1	3	8.9	49.044	448	0	5.913	By MS/MS	By MS/MS	4757500	623680	4133900	887460	1205200
64	gi|872562503;gi|868875367	gi|872562503;gi|868875367	peptide ABC transporter substrate-binding protein [Marinovum algicola];Bacterial extracellular solute-binding protein, family 5 Middle [Marinovum algicola DG 898]	2	20.3536	20.6072	0.978199	0.991847	0.0424825	0.0506473	1.01395		5	5	3	5	11.1	72.011	639	0	5.8857	By MS/MS	By MS/MS	7306600	1294500	6012100	1339800	1597300
69	gi|872562628;gi|868875442	gi|872562628;gi|868875442	sugar-binding protein [Marinovum algicola];ABC-type sugar transport system, periplasmic component [Marinovum algicola DG 898]	2	20.3489	21.7543	0.977976	1.04706	0.0423462	0.112164	1.07064		3	3	2	3	15.4	44.871	422	0	5.8696	By MS/MS	By MS/MS	13887000	1627700	12259000	1335500	3537400
275	gi|872580790;gi|868878079;gi|960387142;gi|960382963;gi|949484089	gi|872580790;gi|868878079	adenosylhomocysteinase [Marinovum algicola];adenosylhomocysteinase [Marinovum algicola DG 898]	5	20.7685	20.1509	0.998142	0.969885	0.0566402	0.0369146	0.971691		4	4	4	3	13	50.498	462	0	5.6309	By MS/MS	By MS/MS	5820900	2751100	3069700	1786300	1164200
189	gi|872574536;gi|868877208;gi|960387247;gi|960380871;gi|949483719	gi|872574536;gi|868877208;gi|960387247;gi|960380871;gi|949483719	50S ribosomal protein L25/general stress protein Ctc [Marinovum algicola];ribosomal protein L25, Ctc-form [Marinovum algicola DG 898];50S ribosomal protein L25/general stress protein Ctc [Ruegeria atlantica];50S ribosomal protein L25/general stress protein	5	21.4336	20.5033	1.03011	0.986846	0.0898132	0.0471277	0.958004		3	3	2	2	13.1	23.325	214	0	5.6176	By MS/MS	By MS/MS	9157700	3750600	5407000	2832500	1486300
141	gi|872571416;gi|868876618	gi|872571416;gi|868876618	triose-phosphate isomerase [Marinovum algicola];triosephosphate isomerase [Marinovum algicola DG 898]	2	22.2895	21.8599	1.07124	1.05214	0.162548	0.120687	0.982172		5	5	4	5	25.5	25.337	251	0	5.5288	By MS/MS	By MS/MS	21654000	5892200	15761000	5126400	3806200
289	gi|872587879;gi|868878680	gi|872587879;gi|868878680	TRAP ABC transporter substrate-binding protein [Marinovum algicola];TRAP transporter solute receptor, TAXI family (plasmid) [Marinovum algicola DG 898]	2	20.4737	19.5375	0.98397	0.940363	0.0461701	0.0241299	0.955682		2	2	2	1	9	34.576	322	0	5.4816	By MS/MS	By matching	3467600	2787600	679940	1456100	761000
283	gi|872587459;gi|868878178	gi|872587459;gi|868878178	hypothetical protein [Marinovum algicola];Bacterial putative lipoprotein [Marinovum algicola DG 898]	2	20.2142	19.9094	0.971499	0.958259	0.0385697	0.0312236	0.986372		5	5	5	4	10.8	76.362	706	0	5.3371	By MS/MS	By MS/MS	3590900	1435000	2155900	1216400	984720
84	gi|872563770;gi|868875767;gi|960378735	gi|872563770;gi|868875767	ornithine decarboxylase [Marinovum algicola];Arginine/lysine/ornithine decarboxylase [Marinovum algicola DG 898]	3	19.1029	19.1118	0.918088	0.919874	0.0178526	0.0179642	1.00195		3	3	1	3	4.1	103.79	917	0	5.3107	By MS/MS	By MS/MS	2599300	446580	2152700	563030	566550
113	gi|872569150;gi|868876192	gi|872569150;gi|868876192	50S ribosomal protein L21 [Marinovum algicola];ribosomal protein L21 [Marinovum algicola DG 898]	2	23.4628	21.5764	1.12763	1.0385	0.366577	0.0991544	0.920957		4	4	3	4	21.7	20.996	203	0	5.2773	By MS/MS	By MS/MS	24425000	13443000	10982000	11561000	3127100
55	gi|872562260;gi|868875232	gi|872562260;gi|868875232	ATP synthase F1 subunit epsilon [Marinovum algicola];ATP synthase, F1 epsilon subunit (delta in mitochondria) [Marinovum algicola DG 898]	2	20.8212	21.7563	1.00067	1.04715	0.0587456	0.112323	1.04645		4	4	4	4	51.4	15.082	144	0	5.2709	By MS/MS	By MS/MS	14292000	2345900	11946000	1852700	3542400
124	gi|872571188;gi|868876420	gi|872571188;gi|868876420	hemolysin D [Marinovum algicola];RND family efflux transporter, MFP subunit [Marinovum algicola DG 898]	2	19.8441	19.4441	0.953711	0.935864	0.0298421	0.0226161	0.981287		3	3	3	3	12	36.551	341	0	5.2448	By MS/MS	By MS/MS	3226000	788120	2437800	941150	713260
160	gi|872571567;gi|868876775	gi|872571567;gi|868876775	ketol-acid reductoisomerase [Marinovum algicola];ketol-acid reductoisomerase [Marinovum algicola DG 898]	2	19.895	20.6429	0.956157	0.993565	0.0309138	0.0519157	1.03912		2	2	2	2	6.8	37.267	340	0	5.0974	By MS/MS	By MS/MS	6242300	1681400	4560900	974950	1637300
120	gi|872571158;gi|868876400;gi|960379314;gi|949485748	gi|872571158;gi|868876400;gi|960379314;gi|949485748	30S ribosomal protein S2 [Marinovum algicola];ribosomal protein S2, bacterial type [Marinovum algicola DG 898];30S ribosomal protein S2 [Ruegeria atlantica];30S ribosomal protein S2 [Ruegeria atlantica]	4	21.0044	20.6426	1.00947	0.993552	0.066698	0.0519061	0.984227		2	2	2	2	7.7	31.008	287	0	5.0043	By MS/MS	By MS/MS	8344400	2572700	5771600	2103500	1637000
295	gi|872588197;gi|868878884	gi|872588197;gi|868878884	sugar ABC transporter substrate-binding protein [Marinovum algicola];ABC-type sugar transport system, periplasmic component (plasmid) [Marinovum algicola DG 898]	2	21.0845	20.8469	1.01333	1.00338	0.0705093	0.0598015	0.990187		3	3	3	3	12	45.643	417	0	4.9791	By MS/MS	By MS/MS	9095400	3180200	5915200	2223700	1886000
109	gi|872568403;gi|868876126;gi|960381717;gi|949485187	gi|872568403;gi|868876126	nitrogen regulatory protein P-II 1 [Marinovum algicola];Nitrogen regulatory protein PII [Marinovum algicola DG 898]	4	21.8478	22.724	1.05001	1.09373	0.119676	0.219667	1.04164		3	3	3	1	29.5	12.225	112	0	4.9757	By MS/MS	By MS/MS	24708000	5345900	19363000	3774300	6927800
40	gi|872560529;gi|868875097	gi|872560529;gi|868875097	50S ribosomal protein L15 [Marinovum algicola];ribosomal protein L15, bacterial/organelle [Marinovum algicola DG 898]	2	20.2842	19.7799	0.974865	0.952028	0.0404881	0.0285439	0.976575		1	1	1	1	7.7	16.377	156	0	4.7753	By MS/MS	By matching	4266800	1733500	2533300	1276900	900210
266	gi|872579791;gi|868877992;gi|960384827;gi|960382651;gi|949486619	gi|872579791;gi|868877992	bifunctional phosphoribosylaminoimidazolecarboxamide formyltransferase/IMP cyclohydrolase [Marinovum algicola];phosphoribosylaminoimidazolecarboxamide formyltransferase/IMP cyclohydrolase [Marinovum algicola DG 898]	5	21.9248	21.571	1.05371	1.03824	0.126239	0.0987866	0.985314		4	4	4	3	12.6	56.286	532	0	4.7541	By MS/MS	By MS/MS	15846000	4581300	11264000	3981300	3115500
265	gi|872579785;gi|868877987	gi|872579785;gi|868877987	4-hydroxy-tetrahydrodipicolinate synthase [Marinovum algicola];dihydrodipicolinate synthase [Marinovum algicola DG 898]	2	20.6349	20.6601	0.99172	0.994391	0.0516303	0.0525371	1.00269		3	3	3	3	14.8	30.311	291	0	4.5472	By MS/MS	By MS/MS	8086300	1595200	6491000	1628300	1656900
128	gi|872571260;gi|868876473	gi|872571260;gi|868876473	peptide ABC transporter substrate-binding protein [Marinovum algicola];ABC-type oligopeptide transport system, periplasmic component [Marinovum algicola DG 898]	2	20.5366	21.2791	0.986994	1.02418	0.048228	0.0806876	1.03768		2	2	1	2	10.3	61.281	542	0	4.4427	By MS/MS	By MS/MS	12003000	2404200	9599100	1521000	2544700
111	gi|872568935;gi|868876175;gi|960385753;gi|960379091;gi|949485819	gi|872568935;gi|868876175	IMP dehydrogenase [Marinovum algicola];inosine-5-monophosphate dehydrogenase [Marinovum algicola DG 898]	5	21.1106	21.2691	1.01458	1.0237	0.0717966	0.0801295	1.00899		5	5	5	5	16.6	50.507	482	0	4.4049	By MS/MS	By MS/MS	10038000	3800400	6237400	2264300	2527100
304	gi|872593370;gi|868879376;gi|960385933;gi|960381945;gi|949485437	gi|872593370;gi|868879376	Zn-dependent hydrolase [Marinovum algicola];amidase, hydantoinase/carbamoylase family (plasmid) [Marinovum algicola DG 898]	5	19.5178	20.2255	0.938029	0.973477	0.0238014	0.0388741	1.03779		3	3	3	2	10.1	44.905	416	0	4.3666	By MS/MS	By MS/MS	4760400	949930	3810500	750640	1226000
47	gi|872561716;gi|868875175	gi|872561716;gi|868875175	succinyl-CoA--3-ketoacid-CoA transferase [Marinovum algicola];3-oxoacid CoA-transferase, A subunit [Marinovum algicola DG 898]	2	20.568	20.493	0.988504	0.986349	0.0492902	0.0467916	0.99782		2	2	2	2	9	25.627	234	0	4.3113	By MS/MS	By MS/MS	6394800	2234600	4160200	1554500	1475700
23	gi|872558932;gi|868874968	gi|872558932;gi|868874968	hypothetical protein [Marinovum algicola];Bacterial protein of unknown function [Marinovum algicola DG 898]	2	19.4306	20.7338	0.933838	0.997941	0.0224056	0.0552926	1.06864		2	2	2	1	27.6	10.678	98	0	4.2102	By MS/MS	By MS/MS	6255300	617790	5637500	706620	1743800
175	gi|872571722;gi|868876932	gi|872571722;gi|868876932	short-chain dehydrogenase [Marinovum algicola];Dehydrogenase with variable specificity [Marinovum algicola DG 898]	2	20.684	21.0118	0.994077	1.01132	0.0534154	0.0670436	1.01735		3	3	2	3	13.5	26.326	259	0	4.1469	By MS/MS	By MS/MS	8384500	2070200	6314300	1684600	2114400
229	gi|872579285;gi|868877563	gi|872579285;gi|868877563	hypothetical protein [Marinovum algicola];hypothetical protein MALG_02979 [Marinovum algicola DG 898]	2	18.9045	20.621	0.908553	0.992514	0.0155588	0.0511356	1.09241		2	2	2	2	13	23.052	216	0	4.1079	By MS/MS	By MS/MS	5549300	703040	4846200	490690	1612700
9	gi|872556576;gi|868874690	gi|872556576;gi|868874690	urease subunit alpha [Marinovum algicola];urease, alpha subunit [Marinovum algicola DG 898]	2	20.4254	20.3209	0.981651	0.978068	0.0446513	0.0415313	0.99635		4	4	4	2	11.6	60.951	570	0	4.0228	By MS/MS	By MS/MS	3714400	2168800	1545600	1408200	1309800
296	gi|872588264;gi|868878923	gi|872588264;gi|868878923	C4-dicarboxylate ABC transporter [Marinovum algicola];TRAP-type C4-dicarboxylate transport system, periplasmic component (plasmid) [Marinovum algicola DG 898]	2	18.2048	19.2235	0.874926	0.925246	0.00957965	0.0194092	1.05751		2	2	1	2	14.6	36.79	335	0	4.0094	By matching	By MS/MS	2533100	321620	2211500	302120	612120
72	gi|872562785;gi|868875537	gi|872562785;gi|868875537	biotin carboxylase [Marinovum algicola];hypothetical protein MALG_00908 [Marinovum algicola DG 898]	2	18.9369	19.8266	0.910114	0.954277	0.015913	0.0294835	1.04853		2	2	2	2	5.9	54.524	489	0	3.8537	By matching	By MS/MS	3566300	435590	3130700	501860	929840
53	gi|872562255;gi|868875230	gi|872562255;gi|868875230	F0F1 ATP synthase subunit gamma [Marinovum algicola];ATP synthase, F1 gamma subunit [Marinovum algicola DG 898]	2	20.1168	19.7894	0.966819	0.952484	0.0360521	0.028732	0.985174		2	2	2	2	8.8	31.866	294	0	3.8175	By MS/MS	By MS/MS	3912900	1709600	2203300	1137000	906140
214	gi|872578076;gi|868877478	gi|872578076;gi|868877478	3-hydroxyacyl-[acyl-carrier-protein] dehydratase FabA [Marinovum algicola];beta-hydroxyacyl-[acyl carrier protein] dehydratase FabA [Marinovum algicola DG 898]	2	19.3418	21.6314	0.929574	1.04114	0.0210691	0.103007	1.12002		4	4	3	3	34.3	18.67	169	0	3.7521	By MS/MS	By MS/MS	9875500	893410	8982100	664470	3248600
285	gi|872587643;gi|868878508	gi|872587643;gi|868878508	ABC transporter substrate-binding protein [Marinovum algicola];ABC-type sugar transport system, periplasmic component (plasmid) [Marinovum algicola DG 898]	2	19.9936	21.3384	0.960895	1.02704	0.0331001	0.0840772	1.06884		4	4	3	4	18.7	45.033	422	0	3.7411	By MS/MS	By MS/MS	9714000	1421500	8292600	1043900	2651600
110	gi|872568899;gi|868876170;gi|960385975;gi|960379140;gi|949485882	gi|872568899;gi|868876170;gi|960385975;gi|960379140;gi|949485882	enoyl-[acyl-carrier-protein] reductase [Marinovum algicola];Enoyl-[acyl-carrier-protein] reductase (NADH) [Marinovum algicola DG 898];enoyl-[acyl-carrier-protein] reductase [Ruegeria atlantica];enoyl-[acyl-carrier-protein] reductase [Ruegeria atlantica];En	5	21.81	20.6328	1.0482	0.99308	0.116584	0.0515542	0.947419		3	3	2	3	11.9	28.796	268	0	3.6412	By MS/MS	By MS/MS	10914000	4296800	6616700	3676800	1625900
243	gi|872579504;gi|868877730	gi|872579504;gi|868877730	phenylalanine--tRNA ligase subunit beta [Marinovum algicola];phenylalanyl-tRNA synthetase, beta subunit, non-spirochete bacterial [Marinovum algicola DG 898]	2	17.6127	18.7446	0.846473	0.902201	0.00635525	0.0139275	1.06584		1	1	1	1	1.5	86.007	799	0	3.6325	By MS/MS	By matching	1683600	316330	1367300	200430	439240
314	gi|872596302;gi|868879617;gi|872587745;gi|868878588	gi|872596302;gi|868879617;gi|872587745;gi|868878588	transaldolase [Marinovum algicola];transaldolase (plasmid) [Marinovum algicola DG 898];transaldolase [Marinovum algicola];transaldolase (plasmid) [Marinovum algicola DG 898]	4	19.252	20.1469	0.925256	0.969694	0.0197969	0.0368131	1.04803		2	2	1	2	9.5	34.237	316	0	3.587	By MS/MS	By MS/MS	4550600	675160	3875400	624350	1161000
78	gi|872563090;gi|868875712;gi|960382050	gi|872563090;gi|868875712	cobaltochelatase subunit CobS [Marinovum algicola];cobaltochelatase, CobS subunit [Marinovum algicola DG 898]	3	18.2423	19.5365	0.876729	0.940315	0.00983204	0.0241131	1.07253		3	3	2	3	11.9	36.794	328	0	3.5073	By MS/MS	By MS/MS	2759900	410520	2349300	310080	760470
234	gi|872579402;gi|868877648	gi|872579402;gi|868877648	glutamine amidotransferase [Marinovum algicola];Putative intracellular protease/amidase [Marinovum algicola DG 898]	2	18.6025	17.5169	0.894042	0.843108	0.0126208	0.00594685	0.94303		1	1	1	1	7	23.62	227	0	3.4782	By MS/MS	By MS/MS	925820	398030	527790	398030	187550
193	gi|872575921;gi|868877296	gi|872575921;gi|868877296	cold-shock protein [Marinovum algicola];Cold shock protein [Marinovum algicola DG 898]	2	22.8056	19.9139	1.09604	0.958477	0.232449	0.0313219	0.87449		2	2	2	2	30.9	7.183	68	0	3.2985	By MS/MS	By MS/MS	14272000	9963500	4308600	7330900	987820
6	gi|872556331;gi|868874656;gi|960380486;gi|949487053	gi|872556331;gi|868874656	DNA polymerase III subunit beta [Marinovum algicola];DNA polymerase III, beta subunit [Marinovum algicola DG 898]	4	20.0895	21.6426	0.965507	1.04168	0.0353767	0.103812	1.0789		4	4	4	3	14.2	40.398	372	0	3.2791	By MS/MS	By MS/MS	10896000	1706400	9190100	1115700	3274000
308	gi|872595476;gi|868879511	gi|872595476;gi|868879511	ABC transporter substrate-binding protein [Marinovum algicola];ABC-type uncharacterized transport system, periplasmic component (plasmid) [Marinovum algicola DG 898]	2	17.7317	18.5886	0.852188	0.894692	0.00690127	0.0125	1.04988		2	2	1	2	6.2	48.24	449	0	3.1077	By matching	By MS/MS	1421400	165640	1255700	217650	394220
211	gi|872577010;gi|868877408	gi|872577010;gi|868877408	electron transfer flavoprotein-ubiquinone oxidoreductase [Marinovum algicola];Dehydrogenase (flavoprotein) [Marinovum algicola DG 898]	2	19.4328	18.5274	0.933943	0.891743	0.0224395	0.0119803	0.954815		2	2	2	1	4.9	59.831	549	0	3.0064	By MS/MS	By matching	1980100	1108800	871320	707690	377830
213	gi|872578059;gi|868877476	gi|872578059;gi|868877476	3-oxoacyl-ACP synthase [Marinovum algicola];3-oxoacyl-(acyl-carrier-protein) synthase [Marinovum algicola DG 898]	2	20.8144	20.4853	1.00035	0.985981	0.0584697	0.0465443	0.98564		2	2	2	2	9.3	42.454	409	0	2.93	By MS/MS	By MS/MS	7338500	1994400	5344000	1844000	1467900
290	gi|872596355;gi|872587883;gi|868879658;gi|868878682	gi|872596355;gi|872587883;gi|868879658;gi|868878682	histidinol dehydrogenase [Marinovum algicola];histidinol dehydrogenase [Marinovum algicola];Histidinol dehydrogenase (plasmid) [Marinovum algicola DG 898];histidinol dehydrogenase (plasmid) [Marinovum algicola DG 898]	4	20.4697	18.3851	0.98378	0.884894	0.0460433	0.0108549	0.899484		3	3	2	2	9.7	47.588	443	0	2.9246	By MS/MS	By MS/MS	2892000	1598000	1294000	1452100	342340
319	gi|872596404;gi|868879662	gi|872596404;gi|868879662	cupin [Marinovum algicola];Cupin domain protein (plasmid) [Marinovum algicola DG 898]	2	18.5005	17.3206	0.889138	0.83366	0.0117589	0.0051903	0.937605		1	1	1	1	3.7	35.555	328	0	2.9222	By MS/MS	By matching	1094800	585270	509530	370850	163690
293	gi|872588084;gi|868878809	gi|872588084;gi|868878809	phosphonate ABC transporter substrate-binding protein [Marinovum algicola];phosphate/phosphite/phosphonate ABC transporter, periplasmic binding protein (plasmid) [Marinovum algicola DG 898]	2	20.5135	21.3397	0.985886	1.0271	0.0474638	0.0841501	1.04181		3	3	3	3	17.3	35.468	324	0	2.8903	By matching	By MS/MS	10250000	1479900	8770400	1496900	2653900
312	gi|872596294;gi|868879612;gi|960385899;gi|960381632;gi|949486007	gi|872596294;gi|868879612	glycerol-3-phosphate ABC transporter ATPase [Marinovum algicola];ABC-type sugar transport system, ATPase component (plasmid) [Marinovum algicola DG 898]	5	20.0431	19.9827	0.963278	0.961791	0.0342574	0.0328528	0.998456		3	3	2	3	9	36.392	334	0	2.8563	By MS/MS	By MS/MS	4509500	1240700	3268800	1080400	1036100
95	gi|872566727;gi|868875959;gi|960385253;gi|960381729;gi|949485173	gi|872566727;gi|868875959;gi|960385253;gi|960381729;gi|949485173	adenylosuccinate lyase [Marinovum algicola];adenylosuccinate lyase [Marinovum algicola DG 898];adenylosuccinate lyase [Ruegeria atlantica];adenylosuccinate lyase [Ruegeria atlantica];Adenylosuccinate lyase [Ruegeria atlantica]	5	17.8985	19.0941	0.860208	0.919018	0.00774755	0.0177442	1.06837		2	2	2	2	6.2	48.383	435	0	2.7881	By matching	By MS/MS	1823600	241870	1581800	244340	559610
73	gi|872562786;gi|868875539	gi|872562786;gi|868875539	hypothetical protein [Marinovum algicola];hypothetical protein MALG_00910 [Marinovum algicola DG 898]	2	20.6115	20.4041	0.990596	0.98207	0.0507995	0.043995	0.991393		2	2	2	2	7.7	35.221	339	0	2.768	By MS/MS	By MS/MS	6361100	1754900	4606200	1602100	1387500
81	gi|872563284;gi|868875742	gi|872563284;gi|868875742	4-hydroxyphenylpyruvate dioxygenase [Marinovum algicola];4-hydroxyphenylpyruvate dioxygenase [Marinovum algicola DG 898]	2	19.9805	19.3382	0.960268	0.930769	0.032802	0.0210161	0.969281		2	2	2	2	9.6	41.047	365	0	2.7162	By MS/MS	By MS/MS	3796000	1478000	2318100	1034500	662800
320	gi|872596364;gi|868879667	gi|872596364;gi|868879667	selenium-binding protein [Marinovum algicola];56kDa selenium binding protein (SBP56) (plasmid) [Marinovum algicola DG 898]	2	18.7629	20.0474	0.901751	0.964903	0.014105	0.0343589	1.07003		3	3	2	3	8	51.921	465	0	2.6705	By MS/MS	By MS/MS	3782800	780440	3002400	444840	1083600
167	gi|872571615;gi|868876822;gi|960383660;gi|960381773;gi|949487986;gi|949487974	gi|872571615;gi|868876822;gi|960383660;gi|960381773;gi|949487986;gi|949487974	phasin, PhaP [Marinovum algicola];hypothetical protein MALG_02220 [Marinovum algicola DG 898];phasin, PhaP [Ruegeria atlantica];phasin, PhaP [Ruegeria atlantica];hypothetical protein RUA4292_00192 [Ruegeria atlantica];hypothetical protein RUA4292_00180 [Ru	6	20.5491	19.8064	0.987597	0.953303	0.0486497	0.0290728	0.965275		2	2	1	2	19.2	15.717	151	0	2.6551	By matching	By MS/MS	5823100	1604100	4219000	1534300	916890
89	gi|872566383;gi|868875916	gi|872566383;gi|868875916	saccharopine dehydrogenase [Marinovum algicola];Saccharopine dehydrogenase [Marinovum algicola DG 898]	2	18.3427	18.1989	0.881557	0.875932	0.010541	0.00954065	0.99362		2	2	1	2	7	45.102	413	0	2.551	By MS/MS	By MS/MS	1377300	223220	1154100	332440	300890
51	gi|872562247;gi|868875226	gi|872562247;gi|868875226	hydroxyacylglutathione hydrolase [Marinovum algicola];hydroxyacylglutathione hydrolase [Marinovum algicola DG 898]	2	18.0712	19.2857	0.868508	0.928244	0.00873273	0.0202656	1.06878		1	1	1	1	5.9	27.487	256	0	2.4605	By matching	By MS/MS	2469400	302890	2166600	275410	639130
24	gi|872559180;gi|868874992	gi|872559180;gi|868874992	pyruvate kinase [Marinovum algicola];pyruvate kinase [Marinovum algicola DG 898]	2	19.4423	18.4834	0.934403	0.889627	0.0225888	0.0116207	0.95208		2	2	2	2	7.5	52.068	481	0	2.4183	By MS/MS	By MS/MS	2195800	664240	1531600	712400	366490
83	gi|872563644;gi|868875757	gi|872563644;gi|868875757	S-(hydroxymethyl)glutathione dehydrogenase [Marinovum algicola];S-(hydroxymethyl)glutathione dehydrogenase/class III alcohol dehydrogenase [Marinovum algicola DG 898]	2	19.6184	20.864	0.942863	1.00421	0.0255203	0.0605149	1.06506		1	1	1	1	4.6	39.469	370	0	2.4032	By matching	By MS/MS	6783600	959930	5823700	804850	1908500
135	gi|872571352;gi|868876555	gi|872571352;gi|868876555	gamma-glutamyltransferase [Marinovum algicola];gamma-glutamyltranspeptidase [Marinovum algicola DG 898]	2	18.5258	20.845	0.890355	1.00329	0.0119673	0.0597222	1.12684		2	2	2	2	6	62.771	597	0	2.3884	By matching	By MS/MS	6451000	603580	5847400	377420	1883500
74	gi|872562939;gi|868875622	gi|872562939;gi|868875622	50S ribosomal protein L28 [Marinovum algicola];ribosomal protein L28 [Marinovum algicola DG 898]	2	20.3854	19.2682	0.979729	0.927398	0.0434306	0.0200202	0.946587		2	2	2	1	30.2	10.504	96	0	2.3835	By MS/MS	By matching	3622600	2512200	1110300	1369700	631390
178	gi|872571760;gi|868876973	gi|872571760;gi|868876973	flavodoxin [Marinovum algicola];Multimeric flavodoxin WrbA [Marinovum algicola DG 898]	2	21.7856	21.7456	1.04702	1.04664	0.114631	0.111495	0.999634		4	4	4	4	25.5	26.707	243	0	2.3781	By MS/MS	By MS/MS	15744000	4250300	11494000	3615200	3516300
14	gi|872557087;gi|868874767	gi|872557087;gi|868874767	phosphoserine aminotransferase [Marinovum algicola];Phosphoserine aminotransferase [Marinovum algicola DG 898]	2	20.3289	20.9048	0.977014	1.00617	0.0417627	0.0622493	1.02984		2	2	1	2	8.6	40.951	384	0	2.3702	By MS/MS	By MS/MS	8612000	1235500	7376500	1317100	1963200
70	gi|872562656;gi|868875459	gi|872562656;gi|868875459	dodecin family protein [Marinovum algicola];hypothetical protein MALG_00829 [Marinovum algicola DG 898]	2	20.0158	20.6078	0.961963	0.991878	0.0336137	0.0506695	1.0311		1	1	1	1	31	7.8726	71	0	2.3283	By MS/MS	By MS/MS	6897800	1415200	5482600	1060100	1598000
20	gi|921086053;gi|868874907	gi|921086053;gi|868874907	hypothetical protein [Marinovum algicola];PRC-barrel domain protein [Marinovum algicola DG 898]	2	19.1835	19.9186	0.921964	0.958705	0.018879	0.0314249	1.03985		2	2	1	2	10.9	35.469	340	0	2.301	By matching	By MS/MS	4282400	389190	3893200	595400	991070
260	gi|872579677;gi|868877889	gi|872579677;gi|868877889	DNA-binding protein [Marinovum algicola];Bacterial nucleoid DNA-binding protein [Marinovum algicola DG 898]	2	20.1328	19.3207	0.967589	0.929925	0.0364548	0.0207621	0.961075		2	2	2	1	26	10.155	96	0	2.2918	By MS/MS	By MS/MS	2292200	1535700	756450	1149700	654790
166	gi|872571600;gi|868876808	gi|872571600;gi|868876808	2,3-cyclic-nucleotide 2-phosphodiesterase [Marinovum algicola];5-nucleotidase/2,3-cyclic phosphodiesterase [Marinovum algicola DG 898]	2	19.1763	18.762	0.921618	0.903037	0.0187851	0.0140961	0.979838		2	2	1	2	6.4	70.081	652	0	2.2592	By MS/MS	By MS/MS	2493000	234410	2258600	592440	444560
194	gi|872575942;gi|868877302	gi|872575942;gi|868877302	glycine cleavage system protein H [Marinovum algicola];glycine cleavage system H protein [Marinovum algicola DG 898]	2	20.4517	21.447	0.982915	1.03227	0.0454726	0.0906471	1.05021		1	1	1	1	15.8	13.118	120	0	2.1585	By MS/MS	By MS/MS	12006000	2072400	9934000	1434100	2858800
126	gi|872571230;gi|868876454	gi|872571230;gi|868876454	cysteine synthase A [Marinovum algicola];Cysteine synthase [Marinovum algicola DG 898]	2	21.1597	20.698	1.01694	0.996215	0.0742825	0.0539355	0.979618		3	3	3	2	10.2	36.393	344	0	2.1568	By MS/MS	By MS/MS	8955800	2536700	6419000	2342700	1701000
196	gi|872576102;gi|868877320	gi|872576102;gi|868877320	hypothetical protein [Marinovum algicola];hypothetical protein MALG_02730 [Marinovum algicola DG 898]	2	17.6692	17.3198	0.849186	0.833622	0.00660892	0.00518744	0.981671		1	1	1	1	5.2	30.943	289	0	2.1551	By matching	By MS/MS	668810	208430	460380	208430	163600
261	gi|872579686;gi|868877897	gi|872579686;gi|868877897	sugar fermentation stimulation protein SfsA [Marinovum algicola];sugar fermentation stimulation protein [Marinovum algicola DG 898]	2	20.0701	21.7736	0.964575	1.04799	0.0349043	0.11368	1.08648		1	1	1	1	5.1	25.595	235	0	2.1491	By MS/MS	By MS/MS	12391000	1300600	11091000	1100800	3585200
106	gi|960385738;gi|960379076;gi|949485803;gi|872568002;gi|868876088	gi|960385738;gi|960379076;gi|949485803;gi|872568002;gi|868876088	Fe-S cluster assembly protein SufB [Ruegeria atlantica];Fe-S cluster assembly protein SufB [Ruegeria atlantica];FeS cluster assembly protein SufB [Ruegeria atlantica];Fe-S cluster assembly protein SufB [Marinovum algicola];FeS assembly protein SufB [Marino	5	19.4166	17.6567	0.933166	0.849836	0.0221893	0.00655184	0.910702		2	2	2	2	4.7	56.681	506	0	2.0506	By MS/MS	By MS/MS	1354800	659280	695500	699800	206630
56	gi|872562320;gi|868875270	gi|872562320;gi|868875270	inositol monophosphatase [Marinovum algicola];Archaeal fructose-1,6-bisphosphatase [Marinovum algicola DG 898]	2	19.8597	18.1216	0.95446	0.872211	0.0301664	0.00904283	0.913826		1	1	1	1	7.3	28.642	261	0	2.0001	By MS/MS	By MS/MS	1753900	951380	802560	951380	285190
133	gi|872571331;gi|868876536	gi|872571331;gi|868876536	N-acetyl-gamma-glutamyl-phosphate reductase [Marinovum algicola];N-acetyl-gamma-glutamyl-phosphate reductase, common form [Marinovum algicola DG 898]	2	19.6343	20.6571	0.94363	0.994248	0.025804	0.0524293	1.05364		2	2	1	2	9.6	36.795	342	0	1.9191	By matching	By MS/MS	6773500	668160	6105300	813800	1653500
112	gi|872569036;gi|868876182	gi|872569036;gi|868876182	GTP-binding protein TypA [Marinovum algicola];GTP-binding protein TypA/BipA [Marinovum algicola DG 898]	2	20.426	19.4128	0.981681	0.934359	0.0446704	0.022131	0.951795		1	1	1	1	2.5	66.234	605	0	1.9093	By MS/MS	By matching	3807200	1951700	1855500	1408800	697960
11	gi|872556598;gi|868874699	gi|872556598;gi|868874699	ABC transporter ATP-binding protein [Marinovum algicola];urea ABC transporter, ATP-binding protein UrtD [Marinovum algicola DG 898]	2	20.2473	21.3628	0.973088	1.02821	0.0394639	0.0855072	1.05665		2	2	1	2	11.4	27.17	246	0	1.8953	By matching	By MS/MS	10399000	1856200	8542400	1244600	2696700
118	gi|868876397;gi|960384330;gi|960380582;gi|949487135;gi|872571153	gi|868876397;gi|960384330;gi|960380582;gi|949487135;gi|872571153	dihydroxy-acid dehydratase [Marinovum algicola DG 898];dihydroxy-acid dehydratase [Ruegeria atlantica];dihydroxy-acid dehydratase [Ruegeria atlantica];Dihydroxy-acid dehydratase [Ruegeria atlantica];dihydroxy-acid dehydratase [Marinovum algicola]	5	16.0922	17.1947	0.773393	0.8276	0.0022151	0.00475653	1.07009		1	1	1	1	2.7	63.773	597	0	1.8702	By matching	By MS/MS	492010	69859	422150	69859	150010
102	gi|872567588;gi|868876049	gi|872567588;gi|868876049	phenylalanine-4-hydroxylase [Marinovum algicola];phenylalanine-4-hydroxylase, monomeric form [Marinovum algicola DG 898]	2	18.1027	18.5547	0.870019	0.893057	0.00892519	0.0122092	1.02648		2	2	1	2	9.8	29.648	265	0	1.8368	By MS/MS	By MS/MS	1682600	368430	1314100	281480	385050
43	gi|872560648;gi|868875104	gi|872560648;gi|868875104	DNA-directed RNA polymerase subunit alpha [Marinovum algicola];DNA-directed RNA polymerase, alpha subunit [Marinovum algicola DG 898]	2	18.9663	18.5073	0.911528	0.890775	0.0162409	0.0118144	0.977233		1	1	1	1	5.3	37.064	338	0	1.8125	By MS/MS	By MS/MS	1560800	512200	1048600	512200	372600
273	gi|872580106;gi|868878036	gi|872580106;gi|868878036	acetyl-CoA acetyltransferase [Marinovum algicola];acetyl-CoA acetyltransferase [Marinovum algicola DG 898]	2	19.1264	17.5796	0.919221	0.846126	0.0181469	0.00621098	0.920481		1	1	1	1	4.8	40.184	392	0	1.7973	By MS/MS	By matching	1123500	572310	551220	572310	195880
17	gi|872557608;gi|868874835	gi|872557608;gi|868874835	hypothetical protein [Marinovum algicola];hypothetical protein MALG_00187 [Marinovum algicola DG 898]	2	18.2406	19.0967	0.876648	0.919147	0.00982063	0.0177771	1.04848		2	2	2	1	38.3	6.8717	60	0	1.7068	By MS/MS	By matching	1887500	309720	1577800	309720	560650
59	gi|872562387;gi|868875307;gi|960381450;gi|960386423;gi|960383562;gi|960381929;gi|949487845;gi|949484659;gi|960386658;gi|960381348;gi|949484581	gi|872562387;gi|868875307;gi|960381450;gi|960386423;gi|960383562;gi|960381929;gi|949487845;gi|949484659	serine hydroxymethyltransferase [Marinovum algicola];Glycine/serine hydroxymethyltransferase [Marinovum algicola DG 898];serine hydroxymethyltransferase, partial [Ruegeria atlantica];serine hydroxymethyltransferase [Ruegeria atlantica];serine hydroxymethyl	11	18.8047	19.9784	0.903757	0.961583	0.0145191	0.0327545	1.06398		4	4	2	3	10.9	46.467	431	0	1.6595	By MS/MS	By MS/MS	3177200	561320	2615800	457900	1033000
228	gi|872579177;gi|868877556	gi|872579177;gi|868877556	transcription termination/antitermination factor NusG [Marinovum algicola];transcription termination/antitermination factor NusG [Marinovum algicola DG 898]	2	17.6607	18.5339	0.848779	0.892058	0.00657023	0.0120348	1.05099		1	1	1	1	7.3	20.203	177	0	1.6493	By matching	By MS/MS	1275300	207210	1068100	207210	379550
242	gi|872579503;gi|868877729	gi|872579503;gi|868877729	alanine dehydrogenase [Marinovum algicola];alanine dehydrogenase [Marinovum algicola DG 898]	2	16.7782	18.4674	0.806362	0.888855	0.00356367	0.0114923	1.1023		2	2	1	2	8.8	38.319	373	0	1.646	By matching	By MS/MS	1193000	78949	1114100	112390	362440
272	gi|960386988;gi|960382791;gi|949483995;gi|872579956;gi|868878024	gi|960386988;gi|960382791;gi|949483995;gi|872579956;gi|868878024	bifunctional ornithine acetyltransferase/N-acetylglutamate synthase [Ruegeria atlantica];bifunctional ornithine acetyltransferase/N-acetylglutamate synthase [Ruegeria atlantica];Arginine biosynthesis bifunctional protein ArgJ [Ruegeria atlantica];bifunctio	5	17.2667	18.126	0.829844	0.872422	0.00500005	0.00907042	1.05131		1	1	1	1	2.9	42.224	408	0	1.635	By matching	By MS/MS	962690	157690	805000	157690	286060
61	gi|872562431;gi|868875329	gi|872562431;gi|868875329	universal stress protein [Marinovum algicola];Universal stress protein UspA [Marinovum algicola DG 898]	2	18.6883	19.8298	0.898162	0.954429	0.0133935	0.0295481	1.06265		3	3	2	3	14.7	29.993	279	0.0038314	1.595	By MS/MS	By MS/MS	3104400	389570	2714900	422400	931880
153	gi|872571509;gi|868876715	gi|872571509;gi|868876715	2-dehydro-3-deoxy-6-phosphogalactonate aldolase [Marinovum algicola];2-keto-3-deoxy-6-phosphogluconate aldolase [Marinovum algicola DG 898]	2	18.339	18.0772	0.881375	0.870075	0.0105135	0.00876887	0.987179		1	1	1	1	8.9	20.742	202	0.0038023	1.5716	By MS/MS	By matching	1109800	331570	778250	331570	276550
88	gi|872565754;gi|868875888	gi|872565754;gi|868875888	lactoylglutathione lyase [Marinovum algicola];Lactoylglutathione lyase [Marinovum algicola DG 898]	2	20.418	19.9083	0.981296	0.95821	0.044423	0.0312017	0.976475		1	1	1	1	6.9	14.837	131	0.0037736	1.5662	By MS/MS	By MS/MS	4558600	2254100	2304600	1401000	984030
329	gi|960386685;gi|960381393;gi|949484537	gi|960386685;gi|960381393;gi|949484537	alanine dehydrogenase [Ruegeria atlantica];alanine dehydrogenase [Ruegeria atlantica];Alanine dehydrogenase [Ruegeria atlantica]	3	18.5845	20.0143	0.893178	0.963309	0.0124645	0.0335789	1.07852		2	2	2	2	6.7	38.507	372	0.0037453	1.525	By MS/MS	By MS/MS	3373600	393000	2980600	393100	1059000
305	gi|872593442;gi|868879384	gi|872593442;gi|868879384	formate dehydrogenase [Marinovum algicola];Fe-S-cluster-containing hydrogenase component 1 (plasmid) [Marinovum algicola DG 898]	2	18.1162	18.3382	0.870671	0.882638	0.00900954	0.0105081	1.01374		1	1	1	1	6.1	21.31	197	0.0037313	1.5156	By MS/MS	By matching	1216800	284140	932620	284140	331400
97	gi|872566895;gi|868875978;gi|949485725	gi|872566895;gi|868875978;gi|949485725	30S ribosomal protein S9 [Marinovum algicola];Ribosomal protein S9 [Marinovum algicola DG 898];hypothetical protein RUA4292_02589 [Ruegeria atlantica]	3	20.4103	20.6881	0.980923	0.99574	0.0441852	0.0535676	1.0151		2	2	2	1	13.6	17.746	162	0.003663	1.4456	By MS/MS	By MS/MS	5140400	2946800	2193600	1393500	1689400
307	gi|872593947;gi|868879413	gi|872593947;gi|868879413	nitrate ABC transporter substrate-binding protein [Marinovum algicola];ABC-type nitrate/sulfonate/bicarbonate transport system, periplasmic component (plasmid) [Marinovum algicola DG 898]	2	20.3912	20.314	0.980007	0.977733	0.043605	0.0413315	0.99768		4	4	3	4	17.9	33.712	324	0.0036496	1.4445	By MS/MS	By MS/MS	6577900	1715500	4862400	1375200	1303500
317	gi|872596350;gi|868879652	gi|872596350;gi|868879652	ABC transporter ATP-binding protein [Marinovum algicola];Glycerol-3-phosphate ABC transporter, ATP-binding protein UgpC (plasmid) [Marinovum algicola DG 898]	2	19.5546	19.9173	0.939801	0.958644	0.0244178	0.031397	1.02005		1	1	1	1	4.6	38.065	348	0.0036232	1.4238	By MS/MS	By MS/MS	4467800	900040	3567800	770080	990190
138	gi|872571358;gi|868876562	gi|872571358;gi|868876562	methylmalonate-semialdehyde dehydrogenase (acylating) [Marinovum algicola];methylmalonic acid semialdehyde dehydrogenase [Marinovum algicola DG 898]	2	17.6367	18.3392	0.847622	0.882687	0.00646147	0.0105154	1.04137		1	1	1	1	3	53.643	499	0.0035587	1.2726	By matching	By MS/MS	1137000	203780	933250	203780	331630
79	gi|872563111;gi|868875734	gi|872563111;gi|868875734	sterol carrier family protein [Marinovum algicola];Putative sterol carrier protein [Marinovum algicola DG 898]	2	18.5565	17.8878	0.891829	0.86096	0.0122244	0.00769016	0.965386		2	2	2	1	23.2	9.6196	95	0.0035461	1.271	By MS/MS	By MS/MS	1068100	385530	682530	385530	242530
256	gi|872579609;gi|868877827	gi|872579609;gi|868877827	membrane protein [Marinovum algicola];Outer membrane protein [Marinovum algicola DG 898]	2	18.9237	20.1704	0.909479	0.970821	0.0157681	0.0374155	1.06745		1	1	1	1	9.7	22.213	216	0.0070175	1.1705	By MS/MS	By MS/MS	3818100	497290	3320800	497290	1180000
251	gi|872579584;gi|868877805	gi|872579584;gi|868877805	dihydropyrimidine dehydrogenase [Marinovum algicola];glutamate synthase small subunit family protein, proteobacterial [Marinovum algicola DG 898]	2	18.3803	18.6163	0.883362	0.896025	0.0108191	0.0127422	1.01433		2	2	1	2	6	52.066	480	0.0069686	1.1408	By matching	By MS/MS	1594700	273630	1321100	341210	401860
107	gi|872568077;gi|868876092	gi|872568077;gi|868876092	Fe-S cluster assembly protein SufD [Marinovum algicola];FeS assembly protein SufD [Marinovum algicola DG 898]	2	19.3588	17.7553	0.930388	0.85458	0.021318	0.0070151	0.918519		1	1	1	1	2.6	46.448	426	0.0069444	1.0926	By MS/MS	By matching	1632600	875870	756760	672320	221240
218	gi|872578870;gi|868877535	gi|872578870;gi|868877535	50S ribosomal protein L23 [Marinovum algicola];Ribosomal protein L23 [Marinovum algicola DG 898]	2	19.4103	19.0946	0.932862	0.919045	0.0220923	0.0177511	0.985189		1	1	1	1	10.2	10.734	98	0.0069204	1.0709	By MS/MS	By matching	2616500	907110	1709400	696740	559830
71	gi|872562667;gi|868875464	gi|872562667;gi|868875464	amino acid dehydrogenase [Marinovum algicola];Glutamate dehydrogenase/leucine dehydrogenase [Marinovum algicola DG 898]	2	19.9356	18.6391	0.95811	0.89712	0.0317969	0.0129448	0.936343		1	1	1	1	3.7	36.569	349	0.0068966	1.0661	By MS/MS	By MS/MS	3329800	908070	2421700	1002800	408250
206	gi|960383194;gi|949487802;gi|872576698;gi|868877384	gi|960383194;gi|949487802;gi|872576698;gi|868877384	30S ribosomal protein S4 [Ruegeria atlantica];30S ribosomal protein S4 [Ruegeria atlantica];30S ribosomal protein S4 [Marinovum algicola];ribosomal protein S4, bacterial/organelle type [Marinovum algicola DG 898]	4	18.3816	16.9591	0.883423	0.816261	0.0108286	0.00403993	0.923975		1	1	1	1	4.4	23.391	206	0.0068493	1.0238	By MS/MS	By matching	935560	538970	396590	341510	127410
98	gi|872567016;gi|868875991	gi|872567016;gi|868875991	aspartate kinase [Marinovum algicola];aspartate kinase, monofunctional class [Marinovum algicola DG 898]	2	19.1053	19.6303	0.918204	0.944829	0.0178824	0.0257327	1.029		2	2	1	2	4.9	43.991	412	0.0068259	1.0116	By matching	By MS/MS	3526300	427900	3098400	563970	811550
216	gi|872578822;gi|868877531	gi|872578822;gi|868877531	50S ribosomal protein L22 [Marinovum algicola];ribosomal protein L22, bacterial type [Marinovum algicola DG 898]	2	20.2612	18.4172	0.973759	0.88644	0.0398476	0.0110994	0.910328		2	2	2	1	14.3	14.174	126	0.0067797	0.98318	By MS/MS	By matching	2657800	2191100	466770	1256700	350050
321	gi|872596365;gi|868879668	gi|872596365;gi|868879668	acryloyl-CoA reductase [Marinovum algicola];Alcohol dehydrogenase (plasmid) [Marinovum algicola DG 898]	2	19.0732	19.1589	0.916665	0.92214	0.0174899	0.01856	1.00597		2	2	2	2	7.9	34.306	328	0.0067568	0.97627	By MS/MS	By MS/MS	2633800	693070	1940700	551590	585340
254	gi|960383725;gi|960383259;gi|949487724;gi|872579591;gi|868877812	gi|960383725;gi|960383259;gi|949487724;gi|872579591;gi|868877812	aspartate--tRNA ligase [Ruegeria atlantica];aspartate--tRNA ligase [Ruegeria atlantica];Aspartate--tRNA ligase [Ruegeria atlantica];aspartate--tRNA ligase [Marinovum algicola];aspartyl-tRNA synthetase, bacterial type [Marinovum algicola DG 898]	5	19.0141	18.7633	0.913824	0.903099	0.0167878	0.0141088	0.988263		2	2	2	2	4.4	66.438	591	0.0066667	0.88525	By MS/MS	By MS/MS	2012800	694070	1318800	529450	444960
68	gi|872562624;gi|868875437	gi|872562624;gi|868875437	C4-dicarboxylate ABC transporter substrate-binding protein [Marinovum algicola];TRAP-type mannitol/chloroaromatic compound transport system, periplasmic component [Marinovum algicola DG 898]	2	19.9187	19.7446	0.957299	0.950328	0.0314272	0.0278533	0.992717		1	1	1	1	3.6	39.193	364	0.0066445	0.87887	By matching	By MS/MS	4298600	1564200	2734400	991140	878430
38	gi|949487361;gi|872560464;gi|868875091	gi|949487361;gi|872560464;gi|868875091	hypothetical protein RUA4292_00521 [Ruegeria atlantica];50S ribosomal protein L18 [Marinovum algicola];ribosomal protein L18, bacterial type [Marinovum algicola DG 898]	3	17.5342	17.4068	0.842698	0.837809	0.00601851	0.00550991	0.994199		1	1	1	1	6.7	12.924	119	0.0065789	0.82515	By MS/MS	By matching	678820	189810	489010	189810	173770
334	gi|960385474;gi|960381523;gi|949485468	gi|960385474;gi|960381523;gi|949485468	acetyl-coenzyme A synthetase [Ruegeria atlantica];acetyl-coenzyme A synthetase [Ruegeria atlantica];Acetyl-coenzyme A synthetase [Ruegeria atlantica]	3	19.8151	19.4581	0.952321	0.936542	0.0292498	0.0228378	0.983431		4	1	1	1	8.6	72.176	654	0.0065359	0.80118	By MS/MS	By MS/MS	2949300	922470	2026900	922470	720250
338	gi|949486295	gi|949486295	Choline-sulfatase [Ruegeria atlantica]	1	23.6044	23.9794	1.13444	1.15415	0.404405	0.52442	1.01738		1	1	1	1	2.1	52.914	473	0.0065147	0.79578	By MS/MS	By MS/MS	72980000	15860000	57120000	12754000	16539000
325	gi|960387309;gi|949483724;gi|960380930;gi|872574267;gi|868877201	gi|960387309;gi|949483724;gi|960380930;gi|872574267;gi|868877201	GTP-binding protein [Ruegeria atlantica];Ribosome-binding ATPase YchF [Ruegeria atlantica];GTP-binding protein [Ruegeria atlantica];GTP-binding protein YchF [Marinovum algicola];GTP-binding protein YchF [Marinovum algicola DG 898]	5	19.4265	17.2855	0.933644	0.831972	0.0223428	0.00506568	0.891102		2	2	2	1	9.6	39.695	365	0.0097087	0.76384	By MS/MS	By matching	1609400	1112100	497300	704640	159760
232	gi|872579383;gi|868877632	gi|872579383;gi|868877632	penicillin-binding protein activator [Marinovum algicola];ABC-type branched-chain amino acid transport system, periplasmic component [Marinovum algicola DG 898]	2	18.686	19.16	0.898052	0.922191	0.0133723	0.0185736	1.02688		2	2	2	1	7.6	40.151	397	0.0096463	0.72334	By MS/MS	By matching	2488900	665570	1823400	421730	585770
205	gi|872576681;gi|868877378	gi|872576681;gi|868877378	manganese-dependent inorganic pyrophosphatase [Marinovum algicola];Inorganic pyrophosphatase/exopolyphosphatase [Marinovum algicola DG 898]	2	16.994	17.5839	0.816737	0.846335	0.00413886	0.00622969	1.03624		1	1	1	1	3.6	32.806	306	0.0096154	0.72119	By matching	By MS/MS	683410	130530	552880	130530	196470
326	gi|960387290;gi|960380918;gi|949483778;gi|872561421;gi|868875151	gi|960387290;gi|960380918;gi|949483778;gi|872561421;gi|868875151	cell division protein FtsH [Ruegeria atlantica];cell division protein FtsH [Ruegeria atlantica];ATP-dependent zinc metalloprotease FtsH [Ruegeria atlantica];cell division protein FtsH [Marinovum algicola];Cell division protein FtsH [Marinovum algicola DG 8	5	21.1694	21.3095	1.01741	1.02565	0.0747835	0.0824093	1.0081		2	2	2	2	3.8	69.439	638	0.0095847	0.71502	By MS/MS	By MS/MS	10184000	2741900	7441800	2358500	2599000
174	gi|872571703;gi|868876908;gi|960385865;gi|960379205;gi|949485960	gi|872571703;gi|868876908;gi|960385865;gi|960379205;gi|949485960	orotate phosphoribosyltransferase [Marinovum algicola];Orotate phosphoribosyltransferase [Marinovum algicola DG 898];orotate phosphoribosyltransferase [Ruegeria atlantica];orotate phosphoribosyltransferase [Ruegeria atlantica];Orotate phosphoribosyltransfe	5	16.1141	16.8405	0.774448	0.81055	0.00224905	0.00372094	1.04662		1	1	1	1	4.4	24.9	225	0.0095541	0.70972	By matching	By MS/MS	401160	70930	330230	70930	117350
66	gi|872562573;gi|868875407	gi|872562573;gi|868875407	50S ribosomal protein L31 [Marinovum algicola];ribosomal protein L31 [Marinovum algicola DG 898]	2	17.8392	18.347	0.857358	0.88306	0.00743555	0.0105721	1.02998		1	1	1	1	13.7	8.2142	73	0.0094937	0.70124	By MS/MS	By matching	1172800	234500	938290	234500	333420
237	gi|872579423;gi|868877664	gi|872579423;gi|868877664	3-isopropylmalate dehydratase large subunit [Marinovum algicola];3-isopropylmalate dehydratase, large subunit [Marinovum algicola DG 898]	2	18.4971	19.1378	0.888977	0.921124	0.0117317	0.0182905	1.03616		1	1	1	1	3.2	50.468	467	0.0094044	0.69267	By MS/MS	By matching	1993300	369990	1623300	369990	576840

## Sheet: Alexandrium
			Minimal variation factor	50	%
					Sample 5	Sample 6			Sample 5	Sample 6
				Median	20.5232	20.4043		Sum of LFQ intensities	705738855	616959081
id	Protein IDs	Majority protein IDs	Protein name	Number of proteins	LFQ Sample 5 (log2(x))	LFQ Sample 6 (log2(x))	LFQ Sample 5 normalized	LFQ Sample 6 normalized	Abundance in Sample 5 [%]	Abundance in Sample 6 [%]	variation factor [LFQ Sample 6]/[LFQ Sample5]	possible variation between Samples	Peptides	Unique peptides	Unique peptides Sample5	Unique peptides Sample6	Sequence coverage [%]	Mol. weight [kDa]	Sequence length	Q-value	Score	Identification type Sample5	Identification type Sample6	Intensity	Intensity Sample5	Intensity Sample6	iBAQ	iBAQ Sample5	iBAQ Sample6	LFQ intensity Sample5	LFQ intensity Sample6
117	gi|737080652;gi|737080629	gi|737080652;gi|737080629	Elongation factor Tu [Mameliella alba];Elongation factor Tu [Mameliella alba]	2	25.8936	24.9664	1.26168	1.22359	8.83315	5.31332	0.969807		10	10	8	8	32.5	42.991	391	0	262.46	By MS/MS	By MS/MS	227010000	68968000	158040000	10810000	3284200	7525800	62339000	32781000
64	gi|737078387;gi|806798226	gi|737078387	ATP synthase subunit alpha [Mameliella alba]	2	24.5099	23.9401	1.19426	1.17329	3.3851	2.60876	0.982444		8	8	7	7	19	54.958	511	0	63.836	By MS/MS	By MS/MS	88944000	28851000	60093000	3420900	1109600	2311300	23890000	16095000
63	gi|737078385;gi|806798228	gi|737078385	ATP synthase subunit beta [Mameliella alba]	2	24.944	25.0554	1.21541	1.22795	4.57365	5.65159	1.01032		7	7	7	7	19.8	50.77	474	0	323.31	By MS/MS	By MS/MS	164140000	51409000	112730000	7136400	2235200	4901200	32278000	34868000
74	gi|737078915	gi|737078915	Molecular chaperone GroEL [Mameliella alba]	1	23.5768	22.6632	1.14879	1.11071	1.77289	1.07659	0.966851		7	7	7	7	15.5	57.764	547	0	83.645	By MS/MS	By MS/MS	46061000	14836000	31225000	1485800	478570	1007300	12512000	6642100
99	gi|737080138	gi|737080138	ABC sugar (Glycerol) transporter, periplasmic binding protein [Mameliella alba]	1	23.0902	23.8125	1.12508	1.16704	1.2653	2.388	1.03729		6	6	6	6	17.5	63.159	570	0	171.69	By MS/MS	By MS/MS	65503000	13839000	51664000	2258700	477200	1781500	8929700	14733000
135	gi|737080980	gi|737080980	Succinyl-CoA ligase [ADP-forming] subunit alpha [Mameliella alba]	1	23.9484	23.3487	1.1669	1.1443	2.29377	1.7314	0.980637		6	6	6	6	28.7	30.343	293	0	38.571	By MS/MS	By MS/MS	59276000	25428000	33848000	5388700	2311700	3077100	16188000	10682000
47	gi|737077709;gi|806796154	gi|737077709	Aconitate hydratase [Mameliella alba]	2	20.7238	22.429	1.00978	1.09923	0.245388	0.915247	1.08858		5	5	3	5	7.8	98.942	919	0	54.868	By MS/MS	By MS/MS	20989000	2878700	18111000	524740	71968	452770	1731800	5646700
12	gi|281331146;gi|312839818;gi|312839810	gi|281331146;gi|312839818;gi|312839810	photosystem II protein D2, partial (chloroplast) [Alexandrium tamarense];photosystem II protein D2, partial (chloroplast) [Alexandrium catenella];photosystem II protein D2, partial (chloroplast) [Alexandrium tamarense]	3	24.8275	24.9605	1.20973	1.2233	4.21884	5.29176	1.01121		4	4	4	4	14.1	39.841	355	0	104.21	By MS/MS	By MS/MS	160500000	30788000	129720000	16050000	3078800	12972000	29774000	32648000
126	gi|737080783	gi|737080783	Branched-chain amino acid ABC transporter substrate-binding protein [Mameliella alba]	1	23.8518	24.2887	1.16219	1.19037	2.14513	3.32178	1.02425		4	4	3	4	19.7	46.02	426	0	52.505	By MS/MS	By MS/MS	90975000	20593000	70383000	7581300	1716000	5865200	15139000	20494000
139	gi|737081064	gi|737081064	Nitrate ABC transporter substrate-binding protein [Mameliella alba]	1	22.8707	23.6497	1.11438	1.15905	1.08672	2.13304	1.04008		4	4	3	4	15.5	35.587	328	0	126.05	By MS/MS	By MS/MS	56239000	13822000	42417000	3749300	921440	2827800	7669400	13160000
138	gi|737080995	gi|737080995	Succinate dehydrogenase [Mameliella alba]	1	21.8156	22.3128	1.06297	1.09354	0.522998	0.844432	1.02875		4	4	4	4	10.2	64.85	600	0	78.722	By MS/MS	By MS/MS	22389000	3323100	19066000	973460	144480	828970	3691000	5209800
224	gi|99643822;gi|422900962;gi|422900960;gi|311063265;gi|134037070	gi|99643822;gi|422900962;gi|422900960;gi|311063265	heat shock protein 90, partial [Alexandrium tamarense];heat shock protein 90, partial [Alexandrium minutum];heat shock protein 90, partial [Alexandrium fundyense];heat shock protein 90, partial [Alexandrium tamarense]	5	20.9398	21.7721	1.0203	1.06703	0.285006	0.580476	1.0458		4	4	3	4	8.7	66.761	578	0	84.201	By MS/MS	By MS/MS	14425000	2763200	11661000	480820	92106	388710	2011400	3581300
29	gi|737075968	gi|737075968	Pyruvate dehydrogenase E1 component [Mameliella alba]	1	21.4331	21.5184	1.04434	1.0546	0.401197	0.486872	1.00983		4	4	4	4	4.6	99.291	885	0	32.875	By MS/MS	By MS/MS	14043000	3999500	10043000	326570	93011	233560	2831400	3003800
118	gi|737080630	gi|737080630	Elongation factor G [Mameliella alba]	1	20.8242	20.6829	1.01467	1.01366	0.263058	0.272854	0.999006		4	4	3	3	9.9	77.972	705	0	35.911	By MS/MS	By MS/MS	8465100	2609100	5856000	217050	66901	150150	1856500	1683400
119	gi|737080632	gi|737080632	30S ribosomal protein S12 [Mameliella alba]	1	22.1752	18.9829	1.0805	0.93034	0.67107	0.083978	0.861028		4	4	4	1	24.4	14.165	123	0	72.043	By MS/MS	By MS/MS	9056400	8014900	1041500	1811300	1603000	208290	4736000	518110
20	gi|737075357	gi|737075357	Glutamine synthetase [Mameliella alba]	1		24.1538		1.18376	n.d.	3.02532		?variant?	3	3	0	3	9.2	52.312	467	0	64.66		By MS/MS	57584000	0	57584000	2214800	0	2214800	0	18665000
121	gi|737080636	gi|737080636	DNA-directed RNA polymerase subunit beta [Mameliella alba]	1		20.4043		1	n.d.	0.224926		?variant?	3	3	1	3	3.5	154.21	1380	0	19.398	By MS/MS	By MS/MS	5735200	1589500	4145700	76470	21194	55276	0	1387700
136	gi|737080984	gi|737080984	Succinyl-CoA ligase [ADP-forming] subunit beta [Mameliella alba]	1	22.5706	23.2765	1.09976	1.14077	0.882621	1.64695	1.03729		3	3	2	3	9.1	42.446	397	0	51.898	By MS/MS	By MS/MS	39586000	8170600	31415000	1649400	340440	1309000	6229000	10161000
62	gi|737078316	gi|737078316	Nitrogen regulatory protein P-II (GlnB, GlnK) [Mameliella alba]	1	23.1014	22.9371	1.12563	1.12413	1.2752	1.30167	0.998672		3	3	2	3	30.4	12.156	112	0	28.414	By MS/MS	By MS/MS	40241000	9823400	30418000	4471300	1091500	3379800	8999600	8030800
53	gi|737077810	gi|737077810	50S ribosomal protein L9 [Mameliella alba]	1	20.5352	22.2718	1.00059	1.09153	0.215306	0.820768	1.09089		3	3	3	3	15.4	22.634	208	0	21.513	By MS/MS	By MS/MS	18202000	1827200	16375000	1820200	182720	1637500	1519500	5063800
10	gi|568002113;gi|568002111;gi|568002104;gi|568002102;gi|568002100;gi|361584213;gi|361584209;gi|422900805;gi|422900803;gi|134037068;gi|568002108;gi|568002106;gi|361584211	gi|568002113;gi|568002111;gi|568002104;gi|568002102;gi|568002100;gi|361584213;gi|361584209;gi|422900805;gi|422900803;gi|134037068	actin, partial [Alexandrium catenella];actin, partial [Alexandrium catenella];actin, partial [Alexandrium catenella];actin, partial [Alexandrium catenella];actin, partial [Alexandrium catenella];actin, partial [Alexandrium catenella];actin, partial [Alexan	13	20.4201	21.572	0.994978	1.05723	0.198799	0.505317	1.06257		3	3	2	3	31.1	14.761	132	0	42.953	By MS/MS	By MS/MS	11772000	2171500	9601000	1471600	271440	1200100	1403000	3117600
131	gi|737080921	gi|737080921	Polyribonucleotide nucleotidyltransferase [Mameliella alba]	1	21.6431	21.5456	1.05457	1.05594	0.464067	0.496159	1.0013		3	3	3	3	3.8	77.422	712	0	39.338	By MS/MS	By MS/MS	14069000	4982600	9086500	413790	146550	267250	3275100	3061100
87	gi|737079221	gi|737079221	2,3,4,5-tetrahydropyridine-2,6-dicarboxylate N-succinyltransferase [Mameliella alba]	1	21.5447	21.4218	1.04977	1.04987	0.433461	0.455346	1.00009		3	3	3	3	12	29.709	275	0	45.61	By MS/MS	By MS/MS	12869000	4348800	8519800	989890	334530	655370	3059100	2809300
57	gi|737078101	gi|737078101	Isocitrate dehydrogenase [Mameliella alba]	1	21.3299	21.278	1.03931	1.04282	0.373495	0.412151	1.00338		3	3	3	3	4.9	78.479	733	0	17.989	By MS/MS	By MS/MS	11578000	3685800	7891900	282380	89897	192490	2635900	2542800
137	gi|737080985	gi|737080985	Malate dehydrogenase [Mameliella alba]	1	20.616	20.946	1.00453	1.02655	0.227719	0.327429	1.02193		3	3	3	3	11.9	33.438	320	0	18.863	By MS/MS	By MS/MS	7619400	2841800	4777500	507960	189450	318500	1607100	2020100
81	gi|737079161	gi|737079161	Heat shock protein 70 [Mameliella alba]	1	20.7099	20.3327	1.0091	0.99649	0.243022	0.214034	0.987506		3	3	3	3	6.1	68.962	639	0	23.912	By MS/MS	By MS/MS	6732300	2941000	3791300	192350	84027	108320	1715100	1320500
95	gi|737080005	gi|737080005	Aerobic cobaltochelatase CobS subunit [Mameliella alba]	1	18.0772	19.4321	0.880822	0.952356	0.0391873	0.114656	1.08121		3	3	1	3	11.9	36.986	328	0	24.722	By MS/MS	By MS/MS	2695000	345650	2349300	117170	15028	102150	276560	707380
69	gi|737078619	gi|737078619	putative Ser/Thr protein phosphatase/nucleotidase [Mameliella alba]	1		21.3041		1.0441	n.d.	0.419687		?variant?	2	2	0	2	8.5	54.558	518	0	22.815		By MS/MS	7501000	0	7501000	468820	0	468820	0	2589300
104	gi|737080447	gi|737080447	Sugar ABC transporter substrate-binding protein [Mameliella alba]	1		18.5593		0.909579	n.d.	0.0626103		?variant?	2	2	0	2	10.8	33.157	315	0	18.788		By MS/MS	1218500	0	1218500	101540	0	101540	0	386280
219	gi|806799732	gi|806799732	TSPc, tail specific protease [Bacillus sp. UMTAT18]	1	20.3647		0.992281		0.191317	n.d.		?variant?	2	2	2	0	7.9	49.841	429	0	11.36	By MS/MS		2174300	2174300	0	86972	86972	0	1350200	0
68	gi|737078611	gi|737078611	30S ribosomal protein S1 [Mameliella alba]	1	18.8047		0.916269		0.0648852	n.d.		?variant?	2	2	1	1	5	61.425	559	0	46.412	By MS/MS	By MS/MS	1053400	819700	233690	40515	31527	8988.2	457920	0
14	gi|53748880	gi|53748880	chlorophyll a/c- binding protein, partial [Alexandrium tamarense]	1	27.7761	26.9664	1.3534	1.32161	32.5687	21.2542	0.976506		2	2	2	2	9.1	11.688	110	0	22.405	By MS/MS	By MS/MS	938590000	394840000	543750000	187720000	78969000	108750000	229850000	131130000
23	gi|737075615	gi|737075615	Superoxide dismutase [Mameliella alba]	1	24.0993	24.9959	1.17425	1.22503	2.54669	5.42337	1.04325		2	2	2	2	9	22.158	199	0	68.926	By MS/MS	By MS/MS	125790000	32646000	93141000	15723000	4080700	11643000	17973000	33460000
91	gi|737079739	gi|737079739	ABC transporter substrate-binding protein [Mameliella alba]	1	23.5563	22.8775	1.14779	1.12121	1.74781	1.249	0.976845		2	2	1	2	5.3	38.494	360	0	11.419	By MS/MS	By MS/MS	48924000	16526000	32399000	2877900	972100	1905800	12335000	7705800
27	gi|737075755	gi|737075755	Branched-chain amino acid ABC transporter, periplasmic substrate-binding protein [Mameliella alba]	1	23.1904	22.7465	1.12997	1.11479	1.35637	1.14059	0.986573		2	2	2	1	6.7	47.112	448	0	79.295	By MS/MS	By MS/MS	33938000	20724000	13214000	2828200	1727000	1101200	9572400	7037000
19	gi|737075356	gi|737075356	Nitrogen regulatory protein P-II family protein [Mameliella alba]	1	21.657	22.6915	1.05525	1.1121	0.468573	1.09792	1.05387		2	2	2	1	25	12.279	112	0	12.456	By MS/MS	By MS/MS	24396000	5033000	19363000	4065900	838840	3227100	3306900	6773700
15	gi|60222962	gi|60222962	photosystem II CP43 protein, partial (plastid) [Alexandrium catenella]	1	22.0904	22.4655	1.07636	1.10102	0.632727	0.938733	1.02291		2	2	2	2	5.1	39.249	356	0	30.155	By MS/MS	By MS/MS	23304000	6020800	17283000	2118600	547340	1571200	4465400	5791600
54	gi|737077812	gi|737077812	30S ribosomal protein S6 [Mameliella alba]	1	22.6248	22.4544	1.1024	1.10048	0.91643	0.931537	0.998252		2	2	1	2	16.7	13.931	120	0	12.408	By MS/MS	By MS/MS	26521000	9364600	17156000	3788700	1337800	2450900	6467600	5747200
112	gi|737080612	gi|737080612	50S ribosomal protein L14 [Mameliella alba]	1	22.2781	21.9942	1.08551	1.07792	0.720663	0.677111	0.993009		2	2	2	2	20.5	13.394	122	0	122.25	By MS/MS	By MS/MS	20484000	6892000	13592000	2926300	984570	1941700	5086000	4177500
129	gi|737080853	gi|737080853	putative branched-chain amino acid ABC transporter, periplasmic branched-chain amino acid binding protein [Mameliella alba]	1	21.2805	21.9213	1.0369	1.07435	0.360927	0.643738	1.03611		2	2	2	2	7.2	47.076	431	0	104.65	By MS/MS	By MS/MS	15628000	2567600	13061000	679500	111640	567860	2547200	3971600
123	gi|737080642	gi|737080642	50S ribosomal protein L1 [Mameliella alba]	1	22.8	21.8431	1.11094	1.07052	1.03473	0.609781	0.963615		2	2	2	2	11.2	24.074	232	0	15.946	By MS/MS	By MS/MS	23271000	8926900	14344000	1790100	686680	1103400	7302500	3762100
35	gi|737076708	gi|737076708	Beta-hydroxyacyl-(Acyl-carrier-protein) dehydratase FabA [Mameliella alba]	1	19.4504	21.413	0.947729	1.04944	0.101509	0.452591	1.10732		2	2	2	2	18.3	18.596	169	0	15.836	By MS/MS	By MS/MS	9455600	768840	8686800	1891100	153770	1737400	716390	2792300
66	gi|737078585	gi|737078585	Acetyl-CoA acetyltransferase [Mameliella alba]	1	21.1421	21.2968	1.03016	1.04374	0.327926	0.417548	1.01318		2	2	2	2	14.8	40.763	391	0	17.266	By MS/MS	By MS/MS	11663000	3668000	7994700	647930	203780	444150	2314300	2576100
45	gi|737077654	gi|737077654	Twin-arginine translocation pathway signal [Mameliella alba]	1	20.4863	21.0216	0.998205	1.03026	0.208136	0.345047	1.03211		2	2	2	2	2.5	107.13	966	0	16.134	By MS/MS	By MS/MS	8498400	2080900	6417500	180820	44274	136540	1468900	2128800
93	gi|737079866	gi|737079866	Enoyl-[acyl-carrier-protein] reductase [NADH] [Mameliella alba]	1	21.7175	20.9992	1.0582	1.02916	0.488623	0.339731	0.97256		2	2	2	2	8.6	28.834	268	0	13.702	By MS/MS	By MS/MS	11734000	5844000	5890000	838140	417430	420720	3448400	2096000
114	gi|737080623	gi|737080623	50S ribosomal protein L2 [Mameliella alba]	1	22.3677	20.9812	1.08988	1.02828	0.766856	0.335517	0.943477		2	2	1	2	7.9	30.511	280	0	17.059	By MS/MS	By MS/MS	14219000	8153600	6065700	1093800	627200	466590	5412000	2070000
133	gi|737080976;gi|806796863	gi|737080976;gi|806796863	Dihydrolipoyllysine-residue succinyltransferase component of 2-oxoglutarate dehydrogenase complex [Mameliella alba];dihydrolipoamide succinyltransferase [Bacillus sp. UMTAT18]	2	18.7422	20.9501	0.913223	1.02675	0.0621335	0.328352	1.12431		2	2	2	2	5.9	53.337	510	0	12.882	By matching	By MS/MS	6574900	792210	5782700	285860	34444	251420	438500	2025800
152	gi|806795482	gi|806795482	putative maturase/reverse transcriptase [Bacillus sp. UMTAT18]	1	21.7185	20.8889	1.05824	1.02375	0.488963	0.314721	0.967406		2	2	2	2	4	76.025	646	0	11.431	By MS/MS	By MS/MS	9905300	3297800	6607500	291330	96995	194340	3450800	1941700
157	gi|806795985	gi|806795985	hydrolase, haloacid dehalogenase-like family [Bacillus sp. UMTAT18]	1	19.3581	20.8849	0.943232	1.02355	0.0952194	0.313846	1.08516		2	2	1	2	14.1	32.008	283	0	11.431	By matching	By MS/MS	6879200	1091100	5788100	491370	77936	413430	672000	1936300
113	gi|737080620	gi|737080620	30S ribosomal protein S3 [Mameliella alba]	1	21.3989	20.8506	1.04267	1.02187	0.391802	0.306471	0.980053		2	2	2	1	7.8	27.816	244	0	39.282	By MS/MS	By MS/MS	9898500	4377100	5521400	659900	291810	368090	2765100	1890800
76	gi|737079038	gi|737079038	Carbon-monoxide dehydrogenase [Mameliella alba]	1	20.9875	20.1021	1.02262	0.985193	0.294585	0.182427	0.963397		2	2	2	1	2.5	84.777	789	0	15.547	By MS/MS	By matching	6182600	3582200	2600400	176650	102350	74296	2079000	1125500
48	gi|737077715	gi|737077715	Adenylosuccinate lyase [Mameliella alba]	1	17.7975	19.4737	0.867193	0.954395	0.0322811	0.118011	1.10056		2	2	2	2	6.2	49.179	436	0	13.573	By matching	By MS/MS	2652400	168490	2483900	106090	6739.7	99355	227820	728080
31	gi|737076162	gi|737076162	Immunogenic protein [Mameliella alba]	1	20.476	19.3986	0.9977	0.950715	0.206649	0.112025	0.952906		2	2	2	2	7.5	33.946	321	0	12.066	By MS/MS	By matching	4290700	2872100	1418700	390070	261100	128970	1458400	691150
83	gi|737079171	gi|737079171	Translation initiation factor IF-2 [Mameliella alba]	1	18.8197	19.1392	0.916998	0.938001	0.0655611	0.0935881	1.0229		2	2	2	2	3	89.236	832	0	14.631	By MS/MS	By MS/MS	2354100	595580	1758500	61950	15673	46277	462690	577400
42	gi|737077510	gi|737077510	Pyruvate carboxylase [Mameliella alba]	1	18.5747	18.739	0.905063	0.918386	0.0553236	0.0709156	1.01472		2	2	1	2	2.4	126.31	1147	0	23.09	By MS/MS	By MS/MS	1995600	285990	1709700	29786	4268.5	25517	390440	437520
72	gi|737078739	gi|737078739	50S ribosomal protein L19 [Mameliella alba]	1	20.9071	18.6059	1.01871	0.911864	0.27863	0.0646672	0.895117		2	2	2	2	21.4	14.533	131	0	25.828	By MS/MS	By matching	4087000	2944100	1142900	681170	490680	190480	1966400	398970
58	gi|737078138	gi|737078138	ErfK/YbiS/YcfS/YnhG family protein/Tat domain protein [Mameliella alba]	1		21.9792		1.07719	n.d.	0.670109		?variant?	1	1	0	1	15.2	20.069	184	0	6.7797		By MS/MS	11825000	0	11825000	1075000	0	1075000	0	4134300
147	gi|806794791	gi|806794791	pXO1-53 [Bacillus sp. UMTAT18]	1		21.6162		1.0594	n.d.	0.521039		?variant?	1	1	1	1	7.6	15.05	131	0	5.7978	By MS/MS	By matching	25518000	16324000	9194400	3189800	2040500	1149300	0	3214600
181	gi|806797334	gi|806797334	squalene-hopene cyclase [Bacillus sp. UMTAT18]	1		20.7882		1.01882	n.d.	0.293504		?variant?	1	1	1	1	1.5	70.141	617	0	5.8045	By matching	By MS/MS	5882500	703330	5179200	235300	28133	207170	0	1810800
165	gi|806796425	gi|806796425	transcriptional regulator [Bacillus sp. UMTAT18]	1		19.5257		0.956944	n.d.	0.122342		?variant?	1	1	0	1	5.7	30.485	261	0	5.9814		By MS/MS	2381000	0	2381000	140060	0	140060	0	754800
50	gi|737077764	gi|737077764	Alpha/beta hydrolase [Mameliella alba]	1		19.4848		0.954938	n.d.	0.11892		?variant?	1	1	0	1	5.1	24.25	217	0	5.8841		By MS/MS	2314400	0	2314400	385730	0	385730	0	733690
92	gi|737079855	gi|737079855	Isocitrate dehydrogenase [NADP] [Mameliella alba]	1		18.9009		0.926319	n.d.	0.0793359		?variant?	1	1	0	1	4.5	45.488	404	0	6.8423		By MS/MS	1544000	0	1544000	61761	0	61761	0	489470
16	gi|737075101	gi|737075101	Sulfonate transporter substrate-binding protein [Mameliella alba]	1		18.7303		0.917961	n.d.	0.0704909		?variant?	1	1	0	1	2.5	34.175	324	0.0061728	5.7773		By MS/MS	1371900	0	1371900	91459	0	91459	0	434900
60	gi|737078203	gi|737078203	ATP-dependent zinc metalloprotease FtsH [Mameliella alba]	1		18.6395		0.913511	n.d.	0.0661908		?variant?	1	1	1	1	1.9	69.499	639	0	5.879	By matching	By MS/MS	2230100	1062100	1168000	65590	31237	34353	0	408370
39	gi|737077136	gi|737077136	putative ABC transporter, ATP-binding protein [Mameliella alba]	1		18.5473		0.908991	n.d.	0.0620916		?variant?	1	1	1	1	4.6	26.141	240	0	6.029	By matching	By MS/MS	1422000	213590	1208400	88876	13349	75527	0	383080
103	gi|737080419	gi|737080419	Extracellular solute-binding protein, family 1 [Mameliella alba]	1		18.4951		0.906433	n.d.	0.0598857		?variant?	1	1	0	1	4	38.21	353	0	18.621		By MS/MS	1165500	0	1165500	89652	0	89652	0	369470
179	gi|806797194	gi|806797194	ribosome recycling factor [Bacillus sp. UMTAT18]	1		18.4167		0.902589	n.d.	0.0567169		?variant?	1	1	0	1	3.8	20.619	185	0	5.8122		By MS/MS	1103800	0	1103800	100350	0	100350	0	349920
56	gi|737078040	gi|737078040	Transcription termination factor Rho [Mameliella alba]	1		18.1643		0.890222	n.d.	0.0476158		?variant?	1	1	0	1	3.5	47.49	423	0	6.3485		By MS/MS	926700	0	926700	34322	0	34322	0	293770
49	gi|737077722	gi|737077722	Peptide/opine/nickel uptake family ABC transporter, periplasmic substrate-binding protein [Mameliella alba]	1		18.0903		0.886592	n.d.	0.0452331		?variant?	1	1	0	1	3	61.116	565	0	60.168		By MS/MS	880330	0	880330	33859	0	33859	0	279070
30	gi|737076000	gi|737076000	Acetyl-coenzyme A carboxylase carboxyl transferase subunit beta [Mameliella alba]	1		17.982		0.881285	n.d.	0.0419623		?variant?	1	1	0	1	4.2	34.505	313	0	6.1838		By MS/MS	816670	0	816670	51042	0	51042	0	258890
222	gi|806799780	gi|806799780	excalibur domain-containing protein [Bacillus sp. UMTAT18]	1		17.8876		0.876658	n.d.	0.0393041		?variant?	1	1	1	1	2.5	36.014	316	0	6.525	By matching	By MS/MS	1101300	407730	693570	84715	31364	53352	0	242490
94	gi|737079995	gi|737079995	HflC protein [Mameliella alba]	1		17.8015		0.872441	n.d.	0.0370284		?variant?	1	1	0	1	2.5	38.856	354	0	7.4011		By MS/MS	720650	0	720650	40036	0	40036	0	228450
204	gi|806798908	gi|806798908	hypothetical protein OA45_00018 [Bacillus sp. UMTAT18]	1		17.4228		0.853882	n.d.	0.02848		?variant?	1	1	0	1	3.8	26.897	236	0	5.8618		By MS/MS	554280	0	554280	34643	0	34643	0	175710
169	gi|806796780	gi|806796780	wall-associated protein [Bacillus sp. UMTAT18]	1		17.3701		0.851296	n.d.	0.0274573		?variant?	2	1	1	1	2.2	121.63	1063	0	9.6487	By matching	By MS/MS	668120	183620	484510	11931	3278.9	8651.9	0	169400
24	gi|737075621	gi|737075621	Sarcosine oxidase, beta subunit family protein [Mameliella alba]	1		17.366		0.851096	n.d.	0.0273794		?variant?	1	1	0	1	3.2	47.524	435	0	9.8567		By MS/MS	532850	0	532850	18374	0	18374	0	168920
26	gi|737075746	gi|737075746	Zn-dependent hydrolase [Mameliella alba]	1		17.0283		0.834547	n.d.	0.0216659		?variant?	1	1	0	1	3.5	31.653	287	0	7.0257		By MS/MS	421660	0	421660	26354	0	26354	0	133670
70	gi|737078622	gi|737078622	ABC transporter, ATP binding/permease protein [Mameliella alba]	1		16.838		0.82522	n.d.	0.0189883		?variant?	1	1	1	1	1.8	63.723	599	0	5.7983	By matching	By MS/MS	754600	419510	335080	26021	14466	11555	0	117150
13	gi|422900827	gi|422900827	beta-tubulin, partial [Alexandrium minutum]	1		16.0225		0.785253	n.d.	0.0107895		?variant?	1	1	0	1	2.9	46.993	421	0	5.8698		By MS/MS	209980	0	209980	9999.2	0	9999.2	0	66567
79	gi|737079116	gi|737079116	Membrane protein [Mameliella alba]	1		15.0921		0.739656	n.d.	0.00566148		?variant?	1	1	1	1	2.8	74.055	679	0	6.0111	By matching	By MS/MS	461060	361160	99903	12133	9504.1	2629	0	34929
41	gi|737077292	gi|737077292	Glycine--tRNA ligase beta subunit [Mameliella alba]	1		14.436		0.707499	n.d.	0.00359262		?variant?	1	1	1	1	2.2	81.248	743	0	6.4093	By matching	By MS/MS	236630	166710	69917	6572.9	4630.8	1942.2	0	22165
44	gi|737077522	gi|737077522	hypothetical protein OA50_03600 [Mameliella alba]	1	20.6736		1.00733		0.236986	n.d.		?variant?	1	1	1	0	3.3	38.144	333	0	5.8897	By MS/MS		1672500	1672500	0	119460	119460	0	1672500	0
198	gi|806798303	gi|806798303	arylsulfatase [Bacillus sp. UMTAT18]	1	20.0278		0.975865		0.151472	n.d.		?variant?	1	1	1	0	1.7	73.402	642	0	6.1247	By MS/MS		1913500	1913500	0	57985	57985	0	1069000	0
61	gi|737078254	gi|737078254	Pyruvate kinase [Mameliella alba]	1	19.497		0.950002		0.104845	n.d.		?variant?	1	1	1	0	3.3	51.994	481	0	5.818	By MS/MS		1224100	1224100	0	48964	48964	0	739930	0
108	gi|737080594	gi|737080594	30S ribosomal protein S13 [Mameliella alba]	1	19.2827		0.939556		0.0903677	n.d.		?variant?	1	1	1	0	10.7	13.585	122	0	6.2137	By MS/MS		1141600	1141600	0	163090	163090	0	637760	0
192	gi|806797890	gi|806797890	putative aminopeptidase [Bacillus sp. UMTAT18]	1	19.1415		0.932676		0.0819425	n.d.		?variant?	1	1	1	0	4.3	41.834	371	0	7.7831	By MS/MS		703130	703130	0	37007	37007	0	578300	0
167	gi|806796605	gi|806796605	thiamine/molybdopterin biosynthesis ThiF/MoeB-like protein [Bacillus sp. UMTAT18]	1	18.8126		0.916651		0.065238	n.d.		?variant?	1	1	1	0	6.2	38.151	339	0	5.7963	By MS/MS		824160	824160	0	51510	51510	0	460410	0
196	gi|806798087	gi|806798087	putative transporter [Bacillus sp. UMTAT18]	1	18.6896		0.91066		0.0599088	n.d.		?variant?	1	1	1	0	4.1	22.668	196	0	5.7887	By MS/MS		422800	422800	0	211400	211400	0	422800	0
132	gi|737080958	gi|737080958	Taurine ABC transporter, periplasmic taurine-binding protein [Mameliella alba]	1	18.5863		0.905626		0.0557685	n.d.		?variant?	1	1	1	0	4.8	34.515	333	0	5.998	By MS/MS		704540	704540	0	140910	140910	0	393580	0
170	gi|806796806	gi|806796806	putative two-component response regulator [Bacillus sp. UMTAT18]	1	18.5856		0.90559		0.0557402	n.d.		?variant?	1	1	1	0	9	26.018	223	0	5.9963	By MS/MS		704170	704170	0	78241	78241	0	393380	0
149	gi|806794963	gi|806794963	50S ribosomal protein L23 [Bacillus sp. UMTAT18]	1	18.387		0.895915		0.0485732	n.d.		?variant?	1	1	1	0	10.4	11.114	96	0	5.8942	By MS/MS		613620	613620	0	102270	102270	0	342800	0
71	gi|737078717	gi|737078717	Aspartate-semialdehyde dehydrogenase [Mameliella alba]	1	18.0391		0.878962		0.0381643	n.d.		?variant?	1	1	1	0	6.2	37.166	340	0	37.421	By MS/MS		482130	482130	0	25375	25375	0	269340	0
214	gi|806799404	gi|806799404	GntR family transcriptional regulator [Bacillus sp. UMTAT18]	1	17.8128		0.867939		0.0326254	n.d.		?variant?	1	1	1	0	5.4	25.439	223	0	6.1369	By MS/MS		230250	230250	0	20932	20932	0	230250	0
174	gi|806797068	gi|806797068	drug resistance transporter, EmrB/QacA family [Bacillus sp. UMTAT18]	1	17.3874		0.847211		0.0242937	n.d.		?variant?	1	1	1	0	2.7	52.262	482	0	5.7842	By MS/MS		171450	171450	0	24493	24493	0	171450	0
40	gi|737077203	gi|737077203	putative NAD(P)H dehydrogenase [Mameliella alba]	1					n.d.	n.d.		?variant?	1	1	1	0	6.1	22.835	197	0	7.9568	By MS/MS		0	0	0	0	0	0	0	0
77	gi|737079068	gi|737079068	Chain-length determining protein [Mameliella alba]	1					n.d.	n.d.		?variant?	1	1	1	0	2	49.088	442	0	5.7984	By MS/MS		0	0	0	0	0	0	0	0
85	gi|737079205	gi|737079205	Carbamoyl phosphate synthase large subunit [Mameliella alba]	1					n.d.	n.d.		?variant?	1	1	0	1	1.9	121.82	1123	0	10.228		By MS/MS	0	0	0	0	0	0	0	0
145	gi|806794688	gi|806794688	transposase [Bacillus sp. UMTAT18]	1					n.d.	n.d.		?variant?	1	1	1	0	1.1	119.02	1017	0	6.1022	By MS/MS		0	0	0	0	0	0	0	0
164	gi|806796414	gi|806796414	protein-export membrane protein-like protein [Bacillus sp. UMTAT18]	1					n.d.	n.d.		?variant?	1	1	0	1	19.8	9.1424	81	0	5.9892		By MS/MS	0	0	0	0	0	0	0	0
206	gi|806798925	gi|806798925	ribosomal protein l5-like protein [Bacillus sp. UMTAT18]	1					n.d.	n.d.		?variant?	1	1	0	1	2.9	42.35	373	0	7.0977		By MS/MS	0	0	0	0	0	0	0	0
210	gi|806799187	gi|806799187	MerR family transcriptional regulator [Bacillus sp. UMTAT18]	1					n.d.	n.d.		?variant?	1	1	1	0	3.8	33.104	291	0	6.2232	By MS/MS		0	0	0	0	0	0	0	0
213	gi|806799376	gi|806799376	collagen adhesion protein [Bacillus sp. UMTAT18]	1					n.d.	n.d.		?variant?	1	1	1	0	2.4	61.393	553	0	5.986	By MS/MS		0	0	0	0	0	0	0	0
215	gi|806799428	gi|806799428	triple helix repeat-containing collagen [Bacillus sp. UMTAT18]	1					n.d.	n.d.		?variant?	1	1	0	1	1.3	64.896	684	0	5.9673		By MS/MS	0	0	0	0	0	0	0	0
212	gi|806799343	gi|806799343	flagellar assembly protein H [Bacillus sp. UMTAT18]	1	24.508	24.0559	1.19417	1.17896	3.38071	2.82677	0.987271		1	1	1	1	3.9	27.892	229	0	5.9276	By MS/MS	By MS/MS	89379000	32878000	56500000	6384200	2348400	4035700	23859000	17440000
38	gi|737077074	gi|737077074	Bmp family protein [Mameliella alba]	1	21.3266	23.1909	1.03915	1.13657	0.372645	1.55205	1.09375		1	1	1	1	4.2	38.338	358	0	41.704	By MS/MS	By MS/MS	33690000	3420500	30269000	2807500	285040	2522400	2629900	9575500
208	gi|806799079	gi|806799079	hypothetical protein OA45_00190 [Bacillus sp. UMTAT18]	1	22.398	22.6526	1.09135	1.11019	0.783094	1.06868	1.01726		1	1	1	1	18.9	6.6598	53	0	6.6251	By MS/MS	By matching	26325000	5526600	20799000	8775000	1842200	6932900	5526600	6593300
86	gi|737079212	gi|737079212	Peptidoglycan binding domain protein [Mameliella alba]	1	22.4217	22.5559	1.09251	1.10545	0.796088	0.999402	1.01185		1	1	1	1	1.8	53.196	489	0	5.8365	By matching	By MS/MS	27693000	10057000	17636000	1107700	402280	705430	5618300	6165900
151	gi|806795388	gi|806795388	hypothetical protein OA45_04677 [Bacillus sp. UMTAT18]	1	22.2524	22.444	1.08426	1.09997	0.707925	0.924859	1.01449		1	1	1	1	9.5	11.268	95	0	6.3204	By MS/MS	By MS/MS	29736000	9575900	20160000	5947200	1915200	4032000	4996100	5706000
11	gi|312839815;gi|261336066;gi|6063404;gi|281331144;gi|261336060;gi|75267190;gi|6044595	gi|312839815;gi|261336066;gi|6063404;gi|281331144;gi|261336060;gi|75267190;gi|6044595	photosystem II protein D1, partial (chloroplast) [Alexandrium catenella];photosystem II protein D1, partial (chloroplast) [Alexandrium tamarense];psbA, partial (chloroplast) [Alexandrium catenella];photosystem II protein D1 (chloroplast) [Alexandrium tamar	7	22.3902	22.435	1.09097	1.09952	0.778886	0.919072	1.00784		1	1	1	1	4	33.161	303	0	46.635	By MS/MS	By MS/MS	28217000	8072000	20145000	9405600	2690700	6714900	5496900	5670300
156	gi|806795976	gi|806795976	sporulation kinase B [Bacillus sp. UMTAT18]	1	20.4706	22.4187	0.99744	1.09872	0.205884	0.908731	1.10155		1	1	1	1	3.1	48.006	422	0	8.1436	By matching	By MS/MS	19506000	1830900	17675000	975290	91545	883740	1453000	5606500
122	gi|737080640	gi|737080640	Periplasmic sensor hybrid histidine kinase [Mameliella alba]	1	20.0126	21.7786	0.975125	1.06736	0.149885	0.583118	1.09458		1	1	1	1	2.5	66.409	607	0	5.9396	By MS/MS	By MS/MS	13545000	2017300	11528000	423280	63040	360240	1057800	3597600
220	gi|806799743	gi|806799743	iron-containing alcohol dehydrogenase [Bacillus sp. UMTAT18]	1	21.1264	21.7551	1.02939	1.0662	0.324369	0.573701	1.03576		1	1	1	1	2.2	44.051	400	0	6.2422	By MS/MS	By MS/MS	13668000	3383000	10285000	804030	199000	605030	2289200	3539500
143	gi|806794536	gi|806794536	XpaF1 protein [Bacillus sp. UMTAT18]	1	20.9035	21.689	1.01853	1.06296	0.277936	0.547994	1.04362		1	1	1	1	13	8.7023	77	0	5.9756	By MS/MS	By MS/MS	13065000	2837100	10227000	2612900	567420	2045500	1961500	3380900
25	gi|737075700	gi|737075700	hypothetical protein OA50_05132 [Mameliella alba]	1	19.7471	21.5993	0.962187	1.05857	0.124689	0.514977	1.10017		1	1	1	1	43.1	5.6904	51	0	5.9424	By MS/MS	By MS/MS	11881000	1242700	10638000	2376200	248540	2127700	879980	3177200
84	gi|737079185	gi|737079185	Periplasmic binding protein/LacI transcriptional regulator [Mameliella alba]	1	20.5522	21.0795	1.00141	1.03309	0.217857	0.359181	1.03164		1	1	1	1	2.6	35.27	341	0	6.9746	By matching	By MS/MS	9944100	1898000	8046100	764930	146000	618930	1537500	2216000
125	gi|737080665	gi|737080665	Electron transfer flavoprotein, alpha subunit [Mameliella alba]	1	21.111	21.0544	1.02864	1.03186	0.320926	0.352989	1.00313		1	1	1	1	6.2	31.228	308	0	90.314	By MS/MS	By MS/MS	9586000	3196000	6390000	684710	228280	456430	2264900	2177800
128	gi|737080832	gi|737080832	Sugar ABC transporter, ATP-binding protein [Mameliella alba]	1	21.1497	20.9677	1.03053	1.02761	0.32964	0.332388	0.997172		1	1	1	1	1.7	58.919	538	0	5.9094	By MS/MS	By matching	10030000	4164400	5865400	323540	134340	189210	2326400	2050700
111	gi|737080607	gi|737080607	50S ribosomal protein L6 [Mameliella alba]	1	21.4802	20.8752	1.04663	1.02308	0.414516	0.311739	0.977495		1	1	1	1	5.6	19.537	177	0	23.836	By MS/MS	By matching	9421400	5123600	4297900	1046800	569290	477540	2925400	1923300
146	gi|806794733	gi|806794733	30S ribosomal protein S18 alanine acetyltransferase [Bacillus sp. UMTAT18]	1	21.4893	20.7194	1.04708	1.01545	0.417151	0.27984	0.969789		1	1	1	1	7.5	16.911	147	0	5.8211	By MS/MS	By matching	7975000	3996100	3978900	886110	444010	442100	2944000	1726500
193	gi|806798018	gi|806798018	cell wall surface anchor family protein [Bacillus sp. UMTAT18]	1	20.5004	20.6724	0.99889	1.01314	0.210177	0.270861	1.01426		1	1	1	1	7.5	14.461	134	0	6.2141	By matching	By MS/MS	7434800	2655200	4779600	1487000	531050	955920	1483300	1671100
34	gi|737076543	gi|737076543	Triosephosphate isomerase [Mameliella alba]	1	20.3277	20.6426	0.990478	1.01168	0.186471	0.265334	1.02141		1	1	1	1	6	25.733	250	0	9.111	By MS/MS	By MS/MS	8573000	1943800	6629200	857300	194380	662920	1316000	1637000
46	gi|737077666	gi|737077666	Fasciclin [Mameliella alba]	1	21.1375	20.6423	1.02994	1.01166	0.326877	0.265269	0.98226		1	1	1	1	5.3	19.315	188	0	7.3217	By MS/MS	By MS/MS	8339300	3327100	5012200	1389900	554510	835360	2306900	1636600
161	gi|806796197	gi|806796197	ATP-binding protein [Bacillus sp. UMTAT18]	1	23.673	20.6032	1.15348	1.00975	1.89518	0.258186	0.875396		1	1	1	1	6.2	22.517	192	0	6.2933	By MS/MS	By matching	27621000	21997000	5623900	2511000	1999700	511260	13375000	1592900
52	gi|737077805	gi|737077805	Trigger factor [Mameliella alba]	1	19.3029	20.3276	0.940542	0.996244	0.0916444	0.213288	1.05922		1	1	1	1	2.5	49.141	441	0	7.6427	By MS/MS	By MS/MS	5210900	893750	4317200	217120	37239	179880	646770	1315900
142	gi|737081148	gi|737081148	Formate dehydrogenase, alpha subunit [Mameliella alba]	1	18.8976	20.2115	0.920795	0.990551	0.0691998	0.196788	1.07576		1	1	1	1	1.9	100.97	925	0	5.8564	By matching	By MS/MS	4318100	488370	3829700	102810	11628	91184	488370	1214100
140	gi|737081083	gi|737081083	Branched-chain amino acid ABC transporter, amino acid-binding protein [Mameliella alba]	1	20.4253	20.0374	0.995233	0.982019	0.199521	0.17442	0.986723		1	1	1	1	3.7	40.111	378	0	80.811	By MS/MS	By MS/MS	4802500	1408100	3394400	228690	67052	161640	1408100	1076100
22	gi|737075422	gi|737075422	Enoyl-CoA hydratase/isomerase [Mameliella alba]	1	20.8554	19.9352	1.01619	0.97701	0.268825	0.162491	0.961443		1	1	1	1	9.2	30.315	273	0	5.8508	By MS/MS	By MS/MS	6263500	3396100	2867400	391470	212250	179210	1897200	1002500
134	gi|737080977	gi|737080977	2-oxoglutarate dehydrogenase, E1 component [Mameliella alba]	1	19.6425	19.9286	0.957092	0.97669	0.115971	0.161756	1.02048		1	1	1	1	2.3	110.82	990	0	7.0533	By matching	By MS/MS	4729300	1039300	3690000	92732	20379	72354	818450	997970
150	gi|806795135	gi|806795135	DNA double-strand break repair Rad50 ATPase [Bacillus sp. UMTAT18]	1	19.7749	19.8998	0.963542	0.975279	0.127115	0.15856	1.01218		1	1	1	1	1.3	114.23	974	0	6.1753	By MS/MS	By MS/MS	4833400	1267400	3566000	112400	29475	82930	897100	978250
191	gi|806797848	gi|806797848	thiol peroxidase [Bacillus sp. UMTAT18]	1	21.8714	19.8965	1.06569	0.975113	0.543629	0.158189	0.915003		1	1	1	1	7.8	17.936	166	0	6.1933	By MS/MS	By matching	9659100	6867600	2791500	965910	686760	279150	3836600	975960
9	gi|134037044	gi|134037044	glyceraldehyde-3-phosphate dehydrogenase [Alexandrium fundyense]	1	18.0614	19.6556	0.88005	0.963311	0.0387594	0.133869	1.09461		1	1	1	1	4.1	36.567	342	0	14.332	By matching	By MS/MS	2851900	489660	2362300	142600	24483	118110	273540	825920
90	gi|737079674	gi|737079674	Ornithine-acyl-ACP acyltransferase [Mameliella alba]	1	19.6164	19.5513	0.955818	0.958197	0.113889	0.12453	1.00249		1	1	1	1	6.8	28.012	250	0	5.8191	By MS/MS	By matching	3636300	1438800	2197500	303020	119900	183130	803760	768300
89	gi|737079597	gi|737079597	Outer membrane protein assembly factor BamA precursor [Mameliella alba]	1	20.1739	19.4814	0.982982	0.954772	0.167612	0.118642	0.971301		1	1	1	1	1.5	87.615	791	0	10.447	By MS/MS	By matching	3928100	1692600	2235500	95807	41283	54524	1182900	731970
109	gi|737080605	gi|737080605	30S ribosomal protein S5 [Mameliella alba]	1	21.0376	19.1386	1.02507	0.93797	0.305014	0.0935475	0.915031		1	1	1	1	7.8	20.934	193	0	15.263	By MS/MS	By matching	4653900	2900100	1753800	465390	290010	175380	2152600	577150
33	gi|737076529	gi|737076529	Tat [Mameliella alba]	1	19.9996	19.0939	0.974491	0.935779	0.148539	0.0906932	0.960275		1	1	1	1	5.3	20.793	189	0	6.3207	By matching	By MS/MS	3476900	1876500	1600400	386320	208500	177820	1048300	559540
21	gi|737075370	gi|737075370	NAD(P) transhydrogenase subunit alpha [Mameliella alba]	1	18.9241	19.0578	0.922087	0.934011	0.0704836	0.0884532	1.01293		1	1	1	1	2.8	54.121	506	0	14.27	By MS/MS	By matching	2451300	890420	1560900	102140	37101	65036	497430	545720
194	gi|806798028	gi|806798028	chromosomal replication initiation protein [Bacillus sp. UMTAT18]	1	20.5111	19.04	0.999415	0.933137	0.21175	0.0873672	0.933684		1	1	1	1	2.2	50.526	446	0	5.9809	By matching	By MS/MS	4216700	2675000	1541700	136020	86292	49732	1494400	539020
88	gi|737079452	gi|737079452	Citrate synthase [Mameliella alba]	1	20.0269	18.9858	0.975819	0.93048	0.151373	0.084145	0.953537		1	1	1	1	3.2	48.329	431	0	6.0536	By MS/MS	By matching	2705900	1068300	1637600	142410	56224	86190	1068300	519140
115	gi|737080625	gi|737080625	50S ribosomal protein L23 [Mameliella alba]	1	18.9028	18.891	0.921049	0.925836	0.0694506	0.0787961	1.0052		1	1	1	1	10.2	10.693	98	0	6.1301	By MS/MS	By matching	1879600	907110	972460	375910	181420	194490	490140	486140
197	gi|806798245	gi|806798245	hypothetical protein OA45_01964 [Bacillus sp. UMTAT18]	1	15.9131	18.8116	0.775374	0.921944	0.00874346	0.0745754	1.18903		1	1	1	1	4.3	26.949	234	0	5.9585	By matching	By MS/MS	1513100	61706	1451400	100870	4113.7	96759	61706	460100
127	gi|737080805	gi|737080805	ABC transporter, ATP-binding protein [Mameliella alba]	1	19.1683	18.7604	0.933983	0.919435	0.0834799	0.0719756	0.984424		1	1	1	1	3.8	61.666	551	0	100.01	By MS/MS	By MS/MS	2437100	859460	1577600	97483	34378	63104	589150	444060
120	gi|737080635	gi|737080635	DNA-directed RNA polymerase subunit beta [Mameliella alba]	1	18.8513	18.4096	0.918538	0.902243	0.0670135	0.0564397	0.982259		1	1	1	1	0.6	157.41	1416	0	8.2384	By MS/MS	By matching	1842500	846580	995950	23323	10716	12607	472940	348210
101	gi|737080221	gi|737080221	3-oxoadipate CoA-succinyl transferase, alpha subunit [Mameliella alba]	1	17.751	18.4048	0.864926	0.902009	0.0312566	0.0562533	1.04287		1	1	1	1	4.3	25.507	234	0	8.1459	By MS/MS	By MS/MS	1315400	220590	1094800	119580	20053	99525	220590	347060
124	gi|737080647	gi|737080647	Transcription termination/antitermination protein NusG [Mameliella alba]	1	17.6607	18.3692	0.860527	0.900264	0.0293607	0.0548821	1.04618		1	1	1	1	7.3	20.196	177	0	6.2824	By matching	By MS/MS	1275300	207210	1068100	127530	20721	106810	207210	338600
105	gi|737080538	gi|737080538	ABC transporter related [Mameliella alba]	1	17.9632	18.3511	0.875265	0.899375	0.0362089	0.0541965	1.02755		1	1	1	1	3	36.578	334	0	7.1241	By MS/MS	By MS/MS	1310300	255540	1054800	77076	15032	62044	255540	334370
202	gi|806798709	gi|806798709	prolyl aminopeptidase [Bacillus sp. UMTAT18]	1	18.8433	18.3098	0.918146	0.89735	0.0666408	0.0526664	0.97735		1	1	1	1	2.1	38.4	332	0	5.9246	By MS/MS	By MS/MS	1904700	689510	1215200	119040	43094	75950	470310	324930
82	gi|737079168	gi|737079168	Arginine biosynthesis bifunctional protein ArgJ [Mameliella alba]	1	17.2667	17.9612	0.84133	0.880268	0.022344	0.0413625	1.04628		1	1	1	1	3	42.026	405	0	6.1121	By matching	By MS/MS	962690	157690	805000	48135	7884.6	40250	157690	255190
36	gi|737076711	gi|737076711	3-oxoacyl-(Acyl-carrier-protein) synthase [Mameliella alba]	1	18.8615	17.8752	0.919034	0.876052	0.0674881	0.0389685	0.953231		1	1	1	1	3.4	42.418	409	0	5.9878	By MS/MS	By MS/MS	1234700	476290	758390	88192	34021	54171	476290	240420
223	gi|806799907	gi|806799907	endo-alpha-N-acetylgalactosaminidase [Bacillus sp. UMTAT18]	1	19.6667	17.8515	0.958269	0.87489	0.117929	0.0383332	0.91299		1	1	1	1	1	161.92	1458	0	5.8367	By MS/MS	By matching	1727800	981790	746040	21331	12121	9210.4	832270	236500
180	gi|806797212	gi|806797212	putative polysaccharide deacetylase [Bacillus sp. UMTAT18]	1	20.9373	17.691	1.02018	0.867024	0.284525	0.0342973	0.849872		1	1	1	1	4.3	34.672	299	0	6.163	By MS/MS	By matching	3438300	3040000	398280	245590	217140	28449	2008000	211600
97	gi|737080094	gi|737080094	Adenylosuccinate synthetase [Mameliella alba]	1	19.0551	17.6735	0.92847	0.866166	0.0771829	0.0338839	0.932897		1	1	1	1	2.6	46.602	431	0	7.5806	By MS/MS	By matching	1472000	934230	537770	66909	42465	24444	544710	209050
107	gi|737080593	gi|737080593	30S ribosomal protein S11 [Mameliella alba]	1	19.0294	17.6455	0.927219	0.864794	0.0758212	0.0332323	0.932675		1	1	1	1	9.9	13.782	131	0	6.981	By MS/MS	By matching	1544300	957860	586420	220610	136840	83774	535100	205030
207	gi|806798945	gi|806798945	hypothetical protein OA45_00055 [Bacillus sp. UMTAT18]	1	17.6802	17.6163	0.861478	0.863365	0.0297603	0.0325678	1.00219		1	1	1	1	2.6	54.046	457	0	5.8329	By MS/MS	By matching	843850	210030	633830	33754	8401.1	25353	210030	200930
51	gi|737077767	gi|737077767	FeS assembly protein SufB [Mameliella alba]	1	18.2883	17.4432	0.891106	0.854881	0.045361	0.0288852	0.959349		1	1	1	1	2.2	57.076	510	0	6.8308	By MS/MS	By MS/MS	882270	320130	562150	29409	10671	18738	320130	178210
110	gi|737080606	gi|737080606	50S ribosomal protein L18 [Mameliella alba]	1	17.5342	17.2421	0.854362	0.845024	0.0268952	0.0251265	0.98907		1	1	1	1	6.7	12.721	119	0	5.8918	By MS/MS	By matching	678820	189810	489010	96975	27116	69859	189810	155020
211	gi|806799327	gi|806799327	hypothetical protein OA45_00438 [Bacillus sp. UMTAT18]	1	18.8634	17.2058	0.919129	0.843246	0.0675788	0.0245024	0.91744		1	1	1	1	2.6	49.384	420	0	5.8431	By MS/MS	By matching	1286100	853720	432390	61243	40653	20590	476930	151170
37	gi|737076847	gi|737076847	Dihydroxy-acid dehydratase [Mameliella alba]	1	16.0922	17.03	0.784098	0.834632	0.0098987	0.0216919	1.06445		1	1	1	1	2.7	63.402	599	0	10.087	By matching	By MS/MS	492010	69859	422150	20501	2910.8	17590	69859	133830
116	gi|737080627	gi|737080627	50S ribosomal protein L3 [Mameliella alba]	1	19.4677	16.9898	0.948572	0.83266	0.102733	0.0210954	0.877804		1	1	1	1	5	29.789	279	0	7.1269	By MS/MS	By matching	1135600	725030	410560	70974	45314	25660	725030	130150

## Sheet: Cylindrospermopsis raciborskii
			Minimal variation factor	50	%
					Sample 5	Sample 6			Sample 5	Sample 6
				Median	20.6627	21.1499		Sum of LFQ intensities	400264078	985624447
id	Protein IDs	Majority protein IDs	Protein names	Number of proteins	LFQ Sample 5 (log2(x))	LFQ Sample 6 (log2(x))	LFQ Sample 5 normalized	LFQ Sample 6 normalized	Abundance in Sample 5 [%]	Abundance in Sample 6 [%]	variation factor [LFQ Sample 6]/[LFQ Sample5]	possible variation between Samples	Peptides	Unique peptides	Unique peptides Sample5	Unique peptides Sample6	Sequence coverage [%]	Mol. weight [kDa]	Sequence length	Q-value	Score	Identification type Sample5	Identification type Sample6	Intensity	Intensity Sample5	Intensity Sample6	iBAQ	iBAQ Sample5	iBAQ Sample6	LFQ intensity Sample5	LFQ intensity Sample6
27	gi|493319859;gi|281194929;gi|1040643150;gi|1004658206	gi|493319859;gi|281194929;gi|1040643150;gi|1004658206	LPS biosynthesis protein [Cylindrospermopsis raciborskii];Lipopolysaccharide biosynthesis [Cylindrospermopsis raciborskii CS-505];capsular biosynthesis protein [Cylindrospermopsis raciborskii CS505];capsular biosynthesis protein [Cylindrospermopsis racibor	4	20.8203	20.5727	1.00763	0.972706	0.462595	0.158225	0.96534		2	2	1	2	1.9	82.411	741	0	15.185	By MS/MS	By MS/MS	3411100	1760400	1650600	94752	48901	45850	1851600	1559500
93	gi|281194744;gi|748750988;gi|1040642829	gi|281194744;gi|748750988;gi|1040642829	TPR repeat protein [Cylindrospermopsis raciborskii CS-505];hypothetical protein [Cylindrospermopsis raciborskii];hypothetical protein A9P98_01710 [Cylindrospermopsis raciborskii CS505]	3	18.6078	20.7727	0.900554	0.982163	0.0998091	0.181753	1.09062		2	2	2	2	6.3	23.07	207	0	12.483	By matching	By MS/MS	2190900	441650	1749200	199170	40150	159020	399500	1791400
95	gi|493319997;gi|281194810;gi|1040642950;gi|1004659000	gi|493319997;gi|281194810;gi|1040642950;gi|1004659000	primosomal protein N [Cylindrospermopsis raciborskii];Primosomal protein n [Cylindrospermopsis raciborskii CS-505];primosomal protein N [Cylindrospermopsis raciborskii CS505];primosomal protein N [Cylindrospermopsis raciborskii]	4	21.124	22.5026	1.02233	1.06396	0.570973	0.602887	1.04072		2	2	2	2	2.3	99.642	884	0	11.892	By MS/MS	By MS/MS	8227600	2271400	5956200	205690	56784	148910	2285400	5942200
103	gi|493318929;gi|281195837;gi|281193963;gi|1040644118;gi|1040643480	gi|493318929;gi|281195837;gi|281193963;gi|1040644118;gi|1040643480	MULTISPECIES: photosystem II D2 protein (photosystem q(a) protein) [Aphanizomenonaceae];Photosystem II reaction centre protein PsbD/D2 [Cylindrospermopsis raciborskii CS-505];Photosystem II reaction centre protein PsbD/D2 [Cylindrospermopsis raciborskii CS	5	25.1651	26.7363	1.2179	1.26413	9.39929	11.3431	1.03796		2	2	2	2	6.3	39.158	351	0	30.09	By MS/MS	By MS/MS	149820000	26485000	123340000	16647000	2942800	13704000	37622000	111800000
105	gi|493319507;gi|281195326;gi|161213730;gi|1040643622;gi|158514582;gi|602182148;gi|602182137	gi|493319507;gi|281195326;gi|161213730;gi|1040643622;gi|158514582;gi|602182148;gi|602182137	type I polyketide synthase [Cylindrospermopsis raciborskii];mixed NRPS/PKS (CyrB) [Cylindrospermopsis raciborskii CS-505];mixed NRPS/PKS [Cylindrospermopsis raciborskii AWT205];hypothetical protein A9P98_06200 [Cylindrospermopsis raciborskii CS505];AoaB, p	7	23.278	24.376	1.12657	1.15254	2.54107	2.20906	1.02305		2	2	2	1	0.9	322.45	2917	0	11.87	By MS/MS	By matching	31944000	10475000	21469000	277770	91085	186690	10171000	21773000
120	gi|493319063;gi|281195664;gi|1040645176;gi|1004660229	gi|493319063;gi|281195664;gi|1040645176;gi|1004660229	aspartate kinase [Cylindrospermopsis raciborskii];Aspartate kinase, monofunctional class [Cylindrospermopsis raciborskii CS-505];aspartate kinase [Cylindrospermopsis raciborskii CS505];aspartate kinase [Cylindrospermopsis raciborskii]	4	18.9806	21.8708	0.918592	1.03409	0.129232	0.389104	1.12573		2	2	2	2	5.7	63.566	601	0	11.932	By MS/MS	By MS/MS	4352400	541140	3811200	140400	17456	122940	517270	3835100
122	gi|1040963582;gi|1040645380;gi|915399223;gi|493319343;gi|281195557	gi|1040963582;gi|1040645380;gi|915399223;gi|493319343;gi|281195557	non-ribosomal peptide synthetase [Cylindrospermopsis raciborskii];non-ribosomal peptide synthetase [Cylindrospermopsis raciborskii CS505];hypothetical protein [Cylindrospermopsis raciborskii];non-ribosomal peptide synthase [Cylindrospermopsis raciborskii];	5	21.3511	20.5561	1.03332	0.971923	0.668309	0.156419	0.940584		2	2	1	2	0.7	345.67	3051	0	13.79	By MS/MS	By MS/MS	4216700	2675000	1541700	30779	19526	11253	2675000	1541700
16	gi|493321231;gi|281193736;gi|1040644288;gi|1004657351	gi|493321231;gi|281193736;gi|1040644288;gi|1004657351	UDP-glucose 6-dehydrogenase [Cylindrospermopsis raciborskii];UDP-glucose/GDP-mannose dehydrogenase [Cylindrospermopsis raciborskii CS-505];UDP-glucose 6-dehydrogenase [Cylindrospermopsis raciborskii CS505];UDP-glucose 6-dehydrogenase [Cylindrospermopsis ra	4		18.4981		0.87462	n.d.	0.037565		?variant?	1	1	0	1	1.5	48.754	453	0	5.9176		By MS/MS	370250	0	370250	15427	0	15427	0	370250
18	gi|1004657660	gi|1004657660	hypothetical protein [Cylindrospermopsis raciborskii]	1					n.d.	n.d.		?variant?	1	1	1	0	4.6	56.146	501	0	6.8018	By MS/MS		0	0	0	0	0	0	0	0
19	gi|1004657696	gi|1004657696	hypothetical protein [Cylindrospermopsis raciborskii]	1		18.5071		0.875042	n.d.	0.0377984		?variant?	1	1	1	1	2.1	37.898	327	0	5.9176	By MS/MS	By matching	637480	264930	372550	57953	24084	33868	0	372550
20	gi|493318622;gi|281196096;gi|1040643763;gi|1004657744	gi|493318622;gi|281196096;gi|1040643763;gi|1004657744	two-component sensor histidine kinase [Cylindrospermopsis raciborskii];Periplasmic Sensor Signal Transduction Histidine Kinase [Cylindrospermopsis raciborskii CS-505];two-component sensor histidine kinase [Cylindrospermopsis raciborskii CS505];sensor histi	4					n.d.	n.d.		?variant?	1	1	0	1	1.7	53.576	472	0	5.9836		By MS/MS	0	0	0	0	0	0	0	0
22	gi|493321756;gi|281193090;gi|1040643663;gi|1004657793	gi|493321756;gi|281193090;gi|1040643663;gi|1004657793	glycosyl transferase family 2 [Cylindrospermopsis raciborskii];Glycosyl transferase, family 2 [Cylindrospermopsis raciborskii CS-505];glycosyl transferase family 2 [Cylindrospermopsis raciborskii CS505];glycosyl transferase family 2 [Cylindrospermopsis rac	4					n.d.	n.d.		?variant?	1	1	0	1	3.1	44.195	393	0	5.9291		By MS/MS	0	0	0	0	0	0	0	0
23	gi|748749861;gi|1040645612;gi|1004657848;gi|281196283	gi|748749861;gi|1040645612;gi|1004657848;gi|281196283	ferredoxin--nitrite reductase [Cylindrospermopsis raciborskii];ferredoxin--nitrite reductase [Cylindrospermopsis raciborskii CS505];ferredoxin--nitrite reductase [Cylindrospermopsis raciborskii];Nitrite/sulfite reductase, hemoprotein beta- component, ferro	4		19.3302		0.913963	n.d.	0.0668764		?variant?	1	1	0	1	2.5	58.648	523	0	5.9768		By MS/MS	659150	0	659150	19974	0	19974	0	659150
25	gi|1004657909;gi|748752203;gi|1040645629;gi|281193093	gi|1004657909;gi|748752203;gi|1040645629;gi|281193093	XRE family transcriptional regulator [Cylindrospermopsis raciborskii];XRE family transcriptional regulator [Cylindrospermopsis raciborskii];XRE family transcriptional regulator [Cylindrospermopsis raciborskii CS505];conserved hypothetical protein [Cylindro	4					n.d.	n.d.		?variant?	1	1	0	1	4.6	24.494	217	0	6.0581		By MS/MS	0	0	0	0	0	0	0	0
29	gi|1004658270	gi|1004658270	Tfp pilus assembly protein PilF [Cylindrospermopsis raciborskii]	1		24.3863		1.15302	n.d.	2.22488		?variant?	1	1	0	1	4.9	29.869	267	0	5.9826		By MS/MS	21929000	0	21929000	1370500	0	1370500	0	21929000
30	gi|1004658286	gi|1004658286	hypothetical protein [Cylindrospermopsis raciborskii]	1	20.5921		0.996586		0.394914	n.d.		?variant?	1	1	1	0	2.9	48.416	417	0	5.9352	By MS/MS		2128000	2128000	0	106400	106400	0	1580700	0
32	gi|493318866;gi|281195888;gi|1040643465;gi|1004658368	gi|493318866;gi|281195888;gi|1040643465;gi|1004658368	MULTISPECIES: 50S ribosomal protein L1 [Cylindrospermopsis];Ribosomal protein L1 [Cylindrospermopsis raciborskii CS-505];50S ribosomal protein L1 [Cylindrospermopsis raciborskii CS505];50S ribosomal protein L1 [Cylindrospermopsis raciborskii]	4	20.4253		0.988513		0.351793	n.d.		?variant?	1	1	1	0	5.5	25.98	238	0	6.015	By MS/MS		1408100	1408100	0	88006	88006	0	1408100	0
34	gi|281196055;gi|748750054;gi|1040642799;gi|1004658516	gi|281196055;gi|748750054;gi|1040642799;gi|1004658516	Heat shock protein DnaJ-like protein [Cylindrospermopsis raciborskii CS-505];molecular chaperone DnaJ [Cylindrospermopsis raciborskii];molecular chaperone DnaJ [Cylindrospermopsis raciborskii CS505];molecular chaperone DnaJ [Cylindrospermopsis raciborskii]	4					n.d.	n.d.		?variant?	1	1	1	0	6.2	22.44	195	0	5.9375	By MS/MS		0	0	0	0	0	0	0	0
35	gi|1004658578	gi|1004658578	(p)ppGpp synthetase [Cylindrospermopsis raciborskii]	1		19.1029		0.903215	n.d.	0.0571272		?variant?	1	1	0	1	1.7	86.267	756	0	5.9213		By MS/MS	563060	0	563060	11980	0	11980	0	563060
36	gi|1004658593	gi|1004658593	hypothetical protein [Cylindrospermopsis raciborskii]	1					n.d.	n.d.		?variant?	1	1	1	0	2.6	53.163	468	0	5.936	By MS/MS		0	0	0	0	0	0	0	0
37	gi|493319944;gi|281194763;gi|1040642909;gi|1004658602	gi|493319944;gi|281194763;gi|1040642909;gi|1004658602	acetyl-coenzyme A synthetase [Cylindrospermopsis raciborskii];Acetate--CoA ligase [Cylindrospermopsis raciborskii CS-505];acetate--CoA ligase [Cylindrospermopsis raciborskii CS505];acetyl-coenzyme A synthetase [Cylindrospermopsis raciborskii]	4		18.9601		0.896464	n.d.	0.0517438		?variant?	1	1	0	1	1.7	73.313	656	0	9.7881		By MS/MS	510000	0	510000	13421	0	13421	0	510000
40	gi|493319176;gi|281195391;gi|1040644757;gi|1004658640	gi|493319176;gi|281195391;gi|1040644757;gi|1004658640	hypothetical protein [Cylindrospermopsis raciborskii];conserved hypothetical protein [Cylindrospermopsis raciborskii CS-505];hypothetical protein A9P98_13000 [Cylindrospermopsis raciborskii CS505];hypothetical protein [Cylindrospermopsis raciborskii]	4		18.8862		0.892967	n.d.	0.0491577		?variant?	1	1	1	1	9.1	11.116	99	0	8.7312	By matching	By MS/MS	668120	183620	484510	167030	45904	121130	0	484510
41	gi|493320972;gi|281193904;gi|1040645500;gi|1004658825	gi|493320972;gi|281193904;gi|1040645500;gi|1004658825	ABC transporter permease [Cylindrospermopsis raciborskii];Secretion protein HlyD [Cylindrospermopsis raciborskii CS-505];ABC transporter permease [Cylindrospermopsis raciborskii CS505];ABC transporter permease [Cylindrospermopsis raciborskii]	4		19.5967		0.926561	n.d.	0.0804414		?variant?	1	1	0	1	3	43.861	399	0	5.9848		By MS/MS	792850	0	792850	33035	0	33035	0	792850
43	gi|1004658882	gi|1004658882	aldo/keto reductase [Cylindrospermopsis raciborskii]	1					n.d.	n.d.		?variant?	1	1	1	1	2	44.631	391	0	6.5204	By MS/MS	By MS/MS	0	0	0	0	0	0	0	0
46	gi|1004658930	gi|1004658930	arylsulfatase [Cylindrospermopsis raciborskii]	1					n.d.	n.d.		?variant?	1	1	0	1	1.5	86.533	780	0	5.9284		By MS/MS	0	0	0	0	0	0	0	0
49	gi|748750500;gi|1040645840;gi|1004659054;gi|281195525	gi|748750500;gi|1040645840;gi|1004659054;gi|281195525	MULTISPECIES: glycosyl transferase family 1 [Cylindrospermopsis];glycosyl transferase family 1 [Cylindrospermopsis raciborskii CS505];glycosyl transferase family 1 [Cylindrospermopsis raciborskii];Glycosyl transferase, group 1 [Cylindrospermopsis raciborsk	4		23.0996		1.09219	n.d.	0.91196		?variant?	1	1	0	1	2.6	43.728	385	0	6.0874		By MS/MS	8988500	0	8988500	390800	0	390800	0	8988500
50	gi|493318216;gi|281196424;gi|1040644442;gi|1004659064	gi|493318216;gi|281196424;gi|1040644442;gi|1004659064	aldo/keto reductase [Cylindrospermopsis raciborskii];Aldo/keto reductase [Cylindrospermopsis raciborskii CS-505];aldo/keto reductase [Cylindrospermopsis raciborskii CS505];aldo/keto reductase [Cylindrospermopsis raciborskii]	4		19.622		0.927758	n.d.	0.0818649		?variant?	1	1	1	1	2.1	36.366	329	0	5.9176	By MS/MS	By matching	976100	169220	806880	57418	9953.9	47464	0	806880
51	gi|748751859;gi|1040645809;gi|1004659124;gi|281193688	gi|748751859;gi|1040645809;gi|1004659124;gi|281193688	magnesium and cobalt transport protein CorA [Cylindrospermopsis raciborskii];magnesium and cobalt transport protein CorA [Cylindrospermopsis raciborskii CS505];magnesium and cobalt transport protein CorA [Cylindrospermopsis raciborskii];Magnesium and cobal	4	15.7075		0.760189		0.0133687	n.d.		?variant?	1	1	1	0	1.9	43.265	374	0	5.9176	By MS/MS		53510	53510	0	4116.1	4116.1	0	53510	0
52	gi|493318332;gi|281196538;gi|1040644529;gi|1004659161	gi|493318332;gi|281196538;gi|1040644529;gi|1004659161	MULTISPECIES: heat-inducible transcriptional repressor HrcA [Cylindrospermopsis];Negative regulator of class I heat shock protein [Cylindrospermopsis raciborskii CS-505];heat-inducible transcriptional repressor HrcA [Cylindrospermopsis raciborskii CS505];h	4	17.7336		0.858242		0.0544491	n.d.		?variant?	1	1	1	0	1.9	40.335	360	0	5.9176	By MS/MS		217940	217940	0	8382.4	8382.4	0	217940	0
53	gi|493318331;gi|281196537;gi|1040644528;gi|1004659162	gi|493318331;gi|281196537;gi|1040644528;gi|1004659162	rhodanese-like domain-containing protein [Cylindrospermopsis raciborskii];Rhodanese-like protein [Cylindrospermopsis raciborskii CS-505];rhodanese-related sulfurtransferase [Cylindrospermopsis raciborskii CS505];rhodanese-related sulfurtransferase [Cylindr	4	15.0336		0.727573		0.00837947	n.d.		?variant?	1	1	1	0	6.1	13.116	115	0	5.9176	By MS/MS		33540	33540	0	5590	5590	0	33540	0
54	gi|1004659242;gi|493319811;gi|281195014;gi|1040643999	gi|1004659242;gi|493319811;gi|281195014;gi|1040643999	hypothetical protein [Cylindrospermopsis raciborskii];membrane protein [Cylindrospermopsis raciborskii];S-layer region protein-like protein [Cylindrospermopsis raciborskii CS-505];hypothetical protein A9P98_08365 [Cylindrospermopsis raciborskii CS505]	4					n.d.	n.d.		?variant?	1	1	0	1	1.5	55.786	522	0	6.0966		By MS/MS	0	0	0	0	0	0	0	0
55	gi|1004659250	gi|1004659250	nuclease [Cylindrospermopsis raciborskii]	1	20.022		0.968995		0.265999	n.d.		?variant?	1	1	1	0	10.7	22.264	197	0	5.9494	By MS/MS		1064700	1064700	0	76053	76053	0	1064700	0
56	gi|1004659256;gi|748750782;gi|1040645667;gi|281195031	gi|1004659256;gi|748750782;gi|1040645667;gi|281195031	valine--tRNA ligase [Cylindrospermopsis raciborskii];valine--tRNA ligase [Cylindrospermopsis raciborskii];valine--tRNA ligase [Cylindrospermopsis raciborskii CS505];Valyl-tRNA synthetase, class Ia [Cylindrospermopsis raciborskii CS-505]	4		22.1755		1.04849	n.d.	0.480579		?variant?	1	1	0	1	1.6	116.75	1028	0	11.974		By MS/MS	4736700	0	4736700	92877	0	92877	0	4736700
58	gi|493320667;gi|281194235;gi|1040642707;gi|1004659322	gi|493320667;gi|281194235;gi|1040642707;gi|1004659322	MULTISPECIES: hypothetical protein, partial [Cylindrospermopsis];hypothetical protein CRC_02310 [Cylindrospermopsis raciborskii CS-505];hypothetical protein A9P98_01015 [Cylindrospermopsis raciborskii CS505];hypothetical protein [Cylindrospermopsis racibor	4		18.0929		0.85546	n.d.	0.0283658		?variant?	1	1	0	1	10.4	6.9632	67	0	5.9176		By MS/MS	279580	0	279580	n. def.	n. def.	n. def.	0	279580
59	gi|1004659332;gi|493320651;gi|281194219;gi|1040642693	gi|1004659332;gi|493320651;gi|281194219;gi|1040642693	deoxyhypusine synthase [Cylindrospermopsis raciborskii];MULTISPECIES: deoxyhypusine synthase [Cylindrospermopsis];Deoxyhypusine synthase [Cylindrospermopsis raciborskii CS-505];deoxyhypusine synthase [Cylindrospermopsis raciborskii CS505]	4	16.1443		0.781326		0.0180953	n.d.		?variant?	1	1	1	0	1.9	39.631	364	0	5.9176	By MS/MS		72429	72429	0	7242.9	7242.9	0	72429	0
62	gi|114462352;gi|1004659492	gi|114462352;gi|1004659492	polyketide synthase-related protein [Cylindrospermopsis raciborskii T3];hypothetical protein [Cylindrospermopsis raciborskii]	2					n.d.	n.d.		?variant?	1	1	1	0	1	140.11	1245	0	5.999	By MS/MS		0	0	0	0	0	0	0	0
63	gi|1004659520	gi|1004659520	phosphoribosylformylglycinamidine cyclo-ligase [Cylindrospermopsis raciborskii]	1		19.9411		0.942843	n.d.	0.102128		?variant?	1	1	0	1	10.2	36.133	343	0	5.942		By MS/MS	1006600	0	1006600	100660	0	100660	0	1006600
65	gi|1004659663	gi|1004659663	ABC transporter substrate-binding protein [Cylindrospermopsis raciborskii]	1	21.9986		1.06466		1.04688	n.d.		?variant?	1	1	1	0	3.9	38.077	337	0	6.0136	By MS/MS		4190300	4190300	0	209510	209510	0	4190300	0
66	gi|1004659721	gi|1004659721	cytidylate kinase [Cylindrospermopsis raciborskii]	1		18.786		0.888232	n.d.	0.0458613		?variant?	1	1	1	1	1.3	60.028	541	0	5.9176	By MS/MS	By matching	907970	455950	452020	31309	15722	15587	0	452020
68	gi|493319084;gi|281195685;gi|1040645193;gi|1004659757	gi|493319084;gi|281195685;gi|1040645193;gi|1004659757	alpha-glucan phosphorylase [Cylindrospermopsis raciborskii];Alpha-glucan phosphorylase [Cylindrospermopsis raciborskii CS-505];alpha-glucan phosphorylase [Cylindrospermopsis raciborskii CS505];alpha-glucan phosphorylase [Cylindrospermopsis raciborskii]	4	19.9171		0.963916		0.247339	n.d.		?variant?	1	1	1	0	4	97.151	854	0	5.9534	By MS/MS		990010	990010	0	23572	23572	0	990010	0
69	gi|1004659817;gi|493319931;gi|281194862;gi|1040642997	gi|1004659817;gi|493319931;gi|281194862;gi|1040642997	hypothetical protein [Cylindrospermopsis raciborskii];hypothetical protein [Cylindrospermopsis raciborskii];hypothetical protein CRC_01636 [Cylindrospermopsis raciborskii CS-505];hypothetical protein A9P98_02670 [Cylindrospermopsis raciborskii CS505]	4		21.0031		0.993056	n.d.	0.213225		?variant?	1	1	1	1	0.6	136.29	1177	0	5.9176	By MS/MS	By matching	2459900	358310	2101600	37845	5512.5	32333	0	2101600
72	gi|748751740;gi|1040645790;gi|1004659929;gi|281193834	gi|748751740;gi|1040645790;gi|1004659929;gi|281193834	paraslipin [Cylindrospermopsis raciborskii];paraslipin [Cylindrospermopsis raciborskii CS505];paraslipin [Cylindrospermopsis raciborskii];Band 7 protein [Cylindrospermopsis raciborskii CS-505]	4	20.7925		1.00628		0.45375	n.d.		?variant?	1	1	1	0	6.5	35.817	323	0	6.0386	By MS/MS		1816200	1816200	0	90808	90808	0	1816200	0
74	gi|1004659993	gi|1004659993	CRISPR-associated protein Cmr3 [Cylindrospermopsis raciborskii]	1		21.7359		1.0277	n.d.	0.354354		?variant?	1	1	1	1	2	45.667	396	0	9.0562	By matching	By MS/MS	9226400	5733800	3492600	369060	229350	139700	0	3492600
75	gi|1004660003	gi|1004660003	type III-B CRISPR-associated protein Cas10/Cmr2, partial [Cylindrospermopsis raciborskii]	1		16.0934		0.760918	n.d.	0.00709368		?variant?	1	1	0	1	1.8	82.593	718	0	8.5392		By MS/MS	69917	0	69917	2255.4	0	2255.4	0	69917
78	gi|1004660077	gi|1004660077	precorrin-3B C(17)-methyltransferase [Cylindrospermopsis raciborskii]	1					n.d.	n.d.		?variant?	1	1	1	0	2.1	63.707	585	0	5.9316	By MS/MS		0	0	0	0	0	0	0	0
80	gi|493319069;gi|281195670;gi|1040645179;gi|1004660219	gi|493319069;gi|281195670;gi|1040645179;gi|1004660219	polysaccharide export protein [Cylindrospermopsis raciborskii];Polysaccharide export protein [Cylindrospermopsis raciborskii CS-505];polysaccharide export protein [Cylindrospermopsis raciborskii CS505];polysaccharide export protein [Cylindrospermopsis raci	4					n.d.	n.d.		?variant?	1	1	1	0	1.7	50.738	477	0	8.2415	By MS/MS		0	0	0	0	0	0	0	0
81	gi|1004660274	gi|1004660274	biopolymer transporter ExbD [Cylindrospermopsis raciborskii]	1	17.4046		0.84232		0.0433464	n.d.		?variant?	1	1	1	0	5.3	14.583	132	0	5.9176	By MS/MS		173500	173500	0	57834	57834	0	173500	0
84	gi|1004660623	gi|1004660623	serine protease, partial [Cylindrospermopsis raciborskii]	1					n.d.	n.d.		?variant?	1	1	0	1	5.6	37.921	337	0	6.1392		By MS/MS	0	0	0	0	0	0	0	0
85	gi|1004660656	gi|1004660656	alpha-amylase [Cylindrospermopsis raciborskii]	1	18.4555		0.893182		0.0898082	n.d.		?variant?	1	1	1	0	1	77.176	670	0	5.9176	By MS/MS		359470	359470	0	10270	10270	0	359470	0
87	gi|1004660762	gi|1004660762	DNA-binding protein, excisionase family [Cylindrospermopsis raciborskii]	1	18.4164		0.89129		0.0874073	n.d.		?variant?	1	1	1	1	7.8	17.139	154	0	5.9448	By MS/MS	By MS/MS	349860	349860	0	34986	34986	0	349860	0
88	gi|1004660771	gi|1004660771	hypothetical protein, partial [Cylindrospermopsis raciborskii]	1		21.768		1.02922	n.d.	0.362329		?variant?	1	1	0	1	7.8	56.568	538	0	6.0191		By MS/MS	3571200	0	3571200	210070	0	210070	0	3571200
89	gi|281195944;gi|493321690;gi|281193202;gi|1040644632;gi|281193275;gi|281195050;gi|748752086;gi|493321554;gi|493318591;gi|281196180;gi|281195256;gi|281195059;gi|281194350;gi|281193717;gi|281193399;gi|1040963411;gi|1040645079;gi|1040644107;gi|1040644088;gi|1040643942;gi|1040643580;gi|1040643188;gi|1040643108;gi|1040642460;gi|1040642444;gi|1040642436	gi|281195944;gi|493321690;gi|281193202;gi|1040644632;gi|281193275;gi|281195050;gi|748752086;gi|493321554;gi|493318591;gi|281196180;gi|281195256;gi|281195059;gi|281194350;gi|281193717;gi|281193399;gi|1040963411;gi|1040645079;gi|1040644107;gi|1040644088;gi|1040643942;gi|1040643580;gi|1040643188;gi|1040643108;gi|1040642460;gi|1040642444;gi|1040642436	Transposase [Cylindrospermopsis raciborskii CS-505];transposase [Cylindrospermopsis raciborskii];Transposase, ISL3 family protein [Cylindrospermopsis raciborskii CS-505];hypothetical protein A9P98_12165 [Cylindrospermopsis raciborskii CS505];Transposase pr	26					n.d.	n.d.		?variant?	1	1	1	0	11.9	12.031	101	0	5.9264	By MS/MS		0	0	0	0	0	0	0	0
90	gi|493320793;gi|281194118;gi|1040642601	gi|493320793;gi|281194118;gi|1040642601	MULTISPECIES: hypothetical protein [Cylindrospermopsis];hypothetical protein CRC_02443 [Cylindrospermopsis raciborskii CS-505];hypothetical protein A9P98_00435 [Cylindrospermopsis raciborskii CS505]	3		21.0459		0.995081	n.d.	0.219648		?variant?	1	1	0	1	7.2	20.827	180	0	5.9196		By MS/MS	2164900	0	2164900	196810	0	196810	0	2164900
91	gi|493318785;gi|281196034;gi|1040642779	gi|493318785;gi|281196034;gi|1040642779	histidine kinase [Cylindrospermopsis raciborskii];Histidine Kinase [Cylindrospermopsis raciborskii CS-505];hybrid sensor histidine kinase/response regulator [Cylindrospermopsis raciborskii CS505]	3	20.1346		0.974443		0.287585	n.d.		?variant?	1	1	1	0	2.1	119.63	1068	0	7.9991	By MS/MS		1151100	1151100	0	20556	20556	0	1151100	0
94	gi|323098407;gi|529280195;gi|545336159;gi|529280197;gi|323098409;gi|325559509;gi|325559507;gi|545336155;gi|545336153;gi|545336151;gi|325559513;gi|325559499;gi|545336163;gi|545336161;gi|363583656;gi|325559515;gi|325559511;gi|325559505;gi|323098401;gi|323098405;gi|323098399;gi|545336157;gi|529280199;gi|325559497;gi|323098403;gi|325559501;gi|283557972;gi|325559503;gi|807778382;gi|807778380;gi|807778…	gi|323098407;gi|529280195;gi|545336159;gi|529280197;gi|323098409;gi|325559509;gi|325559507;gi|545336155;gi|545336153;gi|545336151;gi|325559513;gi|325559499;gi|545336163;gi|545336161;gi|363583656;gi|325559515;gi|325559511;gi|325559505;gi|323098401;gi|323098405;gi|323098399;gi|545336157;gi|529280199;gi|325559497;gi|323098403;gi|325559501;gi|283557972;gi|325559503;gi|807778382;gi|807778380;gi|807778…	RpoC1, partial [Cylindrospermopsis raciborskii NB-05];RNA polymerase, partial [Cylindrospermopsis raciborskii AN1];RNA polymerase, partial [Cylindrospermopsis raciborskii LEGE 00236];RNA polymerase, partial [Cylindrospermopsis raciborskii AT2];RpoC1, parti	82					n.d.	n.d.		?variant?	1	1	1	1	21.5	7.3682	65	0	7.1466	By MS/MS	By MS/MS	0	0	0	0	0	0	0	0
97	gi|493320353;gi|281194417;gi|1040643073	gi|493320353;gi|281194417;gi|1040643073	MULTISPECIES: allophycocyanin subunit alpha [Cylindrospermopsis];Phycobilisome protein [Cylindrospermopsis raciborskii CS-505];allophycocyanin [Cylindrospermopsis raciborskii CS505]	3					n.d.	n.d.		?variant?	1	1	1	0	13	17.925	161	0	6.2074	By MS/MS		0	0	0	0	0	0	0	0
98	gi|493321411;gi|281193405;gi|1040643254	gi|493321411;gi|281193405;gi|1040643254	glycoside hydrolase [Cylindrospermopsis raciborskii];NLP/P60 [Cylindrospermopsis raciborskii CS-505];glycoside hydrolase [Cylindrospermopsis raciborskii CS505]	3					n.d.	n.d.		?variant?	1	1	0	1	3.1	25.817	227	0	6.2869		By MS/MS	0	0	0	0	0	0	0	0
99	gi|493321477;gi|281193470;gi|1040643309	gi|493321477;gi|281193470;gi|1040643309	hypothetical protein [Cylindrospermopsis raciborskii];TPR repeat protein [Cylindrospermopsis raciborskii CS-505];hypothetical protein A9P98_04410 [Cylindrospermopsis raciborskii CS505]	3					n.d.	n.d.		?variant?	1	1	0	1	1	91.325	802	0	6.028		By MS/MS	0	0	0	0	0	0	0	0
101	gi|493318538;gi|281196244;gi|1040643438	gi|493318538;gi|281196244;gi|1040643438	hemolysin D [Cylindrospermopsis raciborskii];Secretion protein HlyD [Cylindrospermopsis raciborskii CS-505];hemolysin D [Cylindrospermopsis raciborskii CS505]	3		18.5019		0.874799	n.d.	0.0376634		?variant?	1	1	0	1	1.8	57.648	511	0	5.9215		By MS/MS	371220	0	371220	12374	0	12374	0	371220
102	gi|493318880;gi|281195901;gi|1040643454	gi|493318880;gi|281195901;gi|1040643454	hypothetical protein [Cylindrospermopsis raciborskii];possible Sensor with Chase2 domain protein [Cylindrospermopsis raciborskii CS-505];histidine kinase [Cylindrospermopsis raciborskii CS505]	3		20.9352		0.989847	n.d.	0.203424		?variant?	1	1	0	1	10.5	36.162	314	0	5.9428		By MS/MS	2005000	0	2005000	154230	0	154230	0	2005000
107	gi|493318981;gi|281195777;gi|1040643698	gi|493318981;gi|281195777;gi|1040643698	inositol monophosphatase [Cylindrospermopsis raciborskii];Inositol monophosphatase [Cylindrospermopsis raciborskii CS-505];inositol monophosphatase [Cylindrospermopsis raciborskii CS505]	3		20.222		0.956126	n.d.	0.124084		?variant?	1	1	0	1	6.6	29.999	272	0	8.8195		By MS/MS	1223000	0	1223000	101920	0	101920	0	1223000
108	gi|496701841;gi|493318983;gi|281195779;gi|1040643700	gi|496701841;gi|493318983;gi|281195779;gi|1040643700	MULTISPECIES: RNA helicase [Aphanizomenonaceae];RNA helicase [Cylindrospermopsis raciborskii];DEAD/DEAH box helicase-like protein [Cylindrospermopsis raciborskii CS-505];RNA helicase [Cylindrospermopsis raciborskii CS505]	4		18.6609		0.882314	n.d.	0.0420505		?variant?	1	1	1	1	1.4	55.52	497	0	5.9176	By MS/MS	By matching	597550	183090	414460	22131	6781	15350	0	414460
109	gi|493318623;gi|281196097;gi|1040643764	gi|493318623;gi|281196097;gi|1040643764	hypothetical protein [Cylindrospermopsis raciborskii];conserved hypothetical protein [Cylindrospermopsis raciborskii CS-505];RNA polymerase subunit sigma-70 [Cylindrospermopsis raciborskii CS505]	3					n.d.	n.d.		?variant?	1	1	1	0	3.9	24.255	207	0	6.6718	By MS/MS		0	0	0	0	0	0	0	0
112	gi|493320555;gi|281194311;gi|1040643863	gi|493320555;gi|281194311;gi|1040643863	chloride channel protein [Cylindrospermopsis raciborskii];Cl- channel, voltage gated [Cylindrospermopsis raciborskii CS-505];chloride channel protein [Cylindrospermopsis raciborskii CS505]	3	17.7642		0.859726		0.0556183	n.d.		?variant?	1	1	1	0	0.8	94.451	867	0	5.9176	By MS/MS		222620	222620	0	5429.8	5429.8	0	222620	0
113	gi|493321555;gi|281193400;gi|1040643943	gi|493321555;gi|281193400;gi|1040643943	hypothetical protein [Cylindrospermopsis raciborskii];hypothetical protein CRC_03204 [Cylindrospermopsis raciborskii CS-505];hypothetical protein A9P98_08045 [Cylindrospermopsis raciborskii CS505]	3		20.8756		0.98703	n.d.	0.195196		?variant?	1	1	0	1	6.7	20.988	179	0	6.0201		By MS/MS	1923900	0	1923900	147990	0	147990	0	1923900
114	gi|493319633;gi|281195234;gi|1040644219	gi|493319633;gi|281195234;gi|1040644219	MULTISPECIES: 50S ribosomal protein L5 [Aphanizomenonaceae];Ribosomal protein L5 [Cylindrospermopsis raciborskii CS-505];50S ribosomal protein L5 [Cylindrospermopsis raciborskii CS505]	3		22.9653		1.08583	n.d.	0.830844		?variant?	1	1	0	1	3.8	20.367	182	0	5.9176		By MS/MS	8189000	0	8189000	744460	0	744460	0	8189000
115	gi|493319655;gi|281195250;gi|1040644232	gi|493319655;gi|281195250;gi|1040644232	MULTISPECIES: 30S ribosomal protein S9 [Aphanizomenonaceae];Ribosomal protein S9 [Cylindrospermopsis raciborskii CS-505];30S ribosomal protein S9 [Cylindrospermopsis raciborskii CS505]	3	17.1797		0.831438		0.0370905	n.d.		?variant?	1	1	1	0	5	15.379	139	0	5.9176	By MS/MS		148460	148460	0	16496	16496	0	148460	0
117	gi|493319670;gi|281195094;gi|1040644889	gi|493319670;gi|281195094;gi|1040644889	MULTISPECIES: hypothetical protein [Cylindrospermopsis];conserved hypothetical protein [Cylindrospermopsis raciborskii CS-505];hypothetical protein A9P98_13760 [Cylindrospermopsis raciborskii CS505]	3		19.6995		0.931421	n.d.	0.0863818		?variant?	1	1	0	1	28.8	14.701	125	0	5.9669		By MS/MS	851400	0	851400	170280	0	170280	0	851400
119	gi|493320481;gi|281194515;gi|1040645017	gi|493320481;gi|281194515;gi|1040645017	citrate synthase [Cylindrospermopsis raciborskii];2-methylcitrate synthase/citrate synthase II [Cylindrospermopsis raciborskii CS-505];citrate synthase [Cylindrospermopsis raciborskii CS505]	3	14.4505		0.699353		0.00559356	n.d.		?variant?	1	1	1	0	1.9	42.561	378	0	5.9176	By MS/MS		22389	22389	0	1178.4	1178.4	0	22389	0
123	gi|493320970;gi|281193902;gi|1040645498	gi|493320970;gi|281193902;gi|1040645498	type I polyketide synthase [Cylindrospermopsis raciborskii];Beta-ketoacyl synthase [Cylindrospermopsis raciborskii CS-505];beta-ketoacyl synthase [Cylindrospermopsis raciborskii CS505]	3	19.2291		0.930619		0.153526	n.d.		?variant?	1	1	1	0	1	254.03	2280	0	6.0059	By MS/MS		614510	614510	0	5743.1	5743.1	0	614510	0
124	gi|915399209;gi|1040645738;gi|281196582	gi|915399209;gi|1040645738;gi|281196582	tyrosine transporter [Cylindrospermopsis raciborskii];tyrosine transporter [Cylindrospermopsis raciborskii CS505];hypothetical protein CRC_00695 [Cylindrospermopsis raciborskii CS-505]	3		20.3716		0.963198	n.d.	0.137639		?variant?	1	1	0	1	1.8	47.263	434	0	5.9373		By MS/MS	1356600	0	1356600	169580	0	169580	0	1356600
127	gi|281194653	gi|281194653	hypothetical protein CRC_01828 [Cylindrospermopsis raciborskii CS-505]	1	19.1131		0.925005		0.141664	n.d.		?variant?	1	1	1	0	1.9	41.697	363	0	5.9176	By MS/MS		567030	567030	0	35439	35439	0	567030	0
128	gi|281195125	gi|281195125	hypothetical protein CRC_01421 [Cylindrospermopsis raciborskii CS-505]	1					n.d.	n.d.		?variant?	1	1	1	0	4	36.222	324	0	6.0395	By MS/MS		0	0	0	0	0	0	0	0
130	gi|496700343	gi|496700343	MULTISPECIES: aspartate--tRNA ligase [Aphanizomenonaceae]	1		20.9989		0.992858	n.d.	0.212606		?variant?	1	1	0	1	6	68.293	598	0	5.9623		By MS/MS	2095500	0	2095500	59871	0	59871	0	2095500
131	gi|496700875	gi|496700875	MULTISPECIES: hypothetical protein [Aphanizomenonaceae]	1		19.6307		0.928167	n.d.	0.0823579		?variant?	1	1	0	1	15.7	9.5381	83	0	5.9655		By MS/MS	811740	0	811740	162350	0	162350	0	811740
132	gi|602182159	gi|602182159	non-ribosomal peptide synthetase [Cylindrospermopsis raciborskii CHAB3438]	1					n.d.	n.d.		?variant?	1	1	1	0	0.4	237.24	2112	0	5.919	By MS/MS		0	0	0	0	0	0	0	0
15	gi|1004657249	gi|1004657249	hypothetical protein [Cylindrospermopsis raciborskii]	1	20.6627	23.9361	1	1.13173	0.414701	1.62841	1.13173		1	1	1	1	3.9	56.689	512	0	6.0007	By MS/MS	By matching	17710000	1659900	16050000	804980	75452	729530	1659900	16050000
17	gi|493320409;gi|281194453;gi|1040643104;gi|496702015;gi|493320237;gi|493319699;gi|493319269;gi|281195483;gi|281195123;gi|281194570;gi|281193243;gi|1040644865;gi|1040644414;gi|1040644250;gi|1040644081;gi|1040644048;gi|1040644029;gi|1040643199;gi|1040642500;gi|1040642431;gi|1004660710;gi|1004657399	gi|493320409;gi|281194453;gi|1040643104;gi|496702015;gi|493320237;gi|493319699;gi|493319269;gi|281195483;gi|281195123;gi|281194570;gi|281193243;gi|1040644865;gi|1040644414;gi|1040644250;gi|1040644081;gi|1040644048;gi|1040644029;gi|1040643199;gi|1040642500;gi|1040642431;gi|1004660710;gi|1004657399	photosystem II q(b) protein [Cylindrospermopsis raciborskii];Photosystem II reaction centre protein PsbA/D1 [Cylindrospermopsis raciborskii CS-505];photosystem II q(b) protein [Cylindrospermopsis raciborskii CS505];MULTISPECIES: photosystem II q(b) protein	22	23.2654	23.9864	1.12596	1.13411	2.51909	1.68624	1.00724		1	1	1	1	3.6	36.747	337	0	47.347	By MS/MS	By MS/MS	26703000	7957100	18746000	3814700	1136700	2678000	10083000	16620000
21	gi|1004657758	gi|1004657758	NAD(P)-dependent oxidoreductase [Cylindrospermopsis raciborskii]	1	21.1958	20.7406	1.0258	0.980646	0.600104	0.177755	0.955979		1	1	1	1	5.1	28.111	257	0	5.921	By matching	By MS/MS	4154000	2402000	1752000	296720	171570	125140	2402000	1752000
24	gi|1004657853	gi|1004657853	bacitracin ABC transporter ATP-binding protein [Cylindrospermopsis raciborskii]	1	19.4988	22.0867	0.943672	1.04429	0.185085	0.451906	1.10663		1	1	1	1	3.5	32.208	285	0	6.094	By MS/MS	By matching	5195000	740830	4454100	432910	61736	371180	740830	4454100
26	gi|1004657954	gi|1004657954	hypothetical protein [Cylindrospermopsis raciborskii]	1	16.7826	17.2407	0.81222	0.815166	0.0281664	0.0157129	1.00363		1	1	1	1	0.8	124.14	1167	0	6.0745	By MS/MS	By MS/MS	267610	112740	154870	6371.7	2684.4	3687.3	112740	154870
28	gi|493319846;gi|281194917;gi|1040643161;gi|1004658222	gi|493319846;gi|281194917;gi|1040643161;gi|1004658222	hypothetical protein [Cylindrospermopsis raciborskii];conserved hypothetical protein [Cylindrospermopsis raciborskii CS-505];hypothetical protein A9P98_03580 [Cylindrospermopsis raciborskii CS505];hypothetical protein [Cylindrospermopsis raciborskii]	4	22.7599	22.271	1.1015	1.053	1.77445	0.513471	0.955975		1	1	1	1	3.3	82.043	727	0	9.2132	By MS/MS	By MS/MS	22300000	11061000	11239000	637150	316040	321110	7102500	5060900
31	gi|493320916;gi|281193982;gi|1040643496;gi|1004658331	gi|493320916;gi|281193982;gi|1040643496;gi|1004658331	DNA gyrase subunit A [Cylindrospermopsis raciborskii];DNA gyrase, subunit A [Cylindrospermopsis raciborskii CS-505];DNA gyrase subunit A [Cylindrospermopsis raciborskii CS505];DNA gyrase subunit A [Cylindrospermopsis raciborskii]	4	20.8873	21.1499	1.01087	1	0.484555	0.236074	0.989248		1	1	1	1	1.6	92.827	838	0	5.9227	By MS/MS	By matching	4266300	1939500	2326800	106660	48487	58171	1939500	2326800
33	gi|493318228;gi|281196436;gi|1040644452;gi|1004658449	gi|493318228;gi|281196436;gi|1040644452;gi|1004658449	MULTISPECIES: 30S ribosomal protein S2 [Cylindrospermopsis];Ribosomal protein S2 [Cylindrospermopsis raciborskii CS-505];30S ribosomal protein S2 [Cylindrospermopsis raciborskii CS505];30S ribosomal protein S2 [Cylindrospermopsis raciborskii]	4	19.0161	21.6297	0.920314	1.02269	0.13246	0.329223	1.11124		1	1	1	1	3.4	30.178	263	0	5.9209	By matching	By MS/MS	3775000	530190	3244900	290390	40784	249600	530190	3244900
38	gi|1004658619	gi|1004658619	bifunctional folylpolyglutamate synthase/dihydrofolate synthase [Cylindrospermopsis raciborskii]	1	26.7299	27.8726	1.29363	1.31786	27.8066	24.9324	1.01873		1	1	1	1	1.8	48.785	439	0	5.9723	By MS/MS	By MS/MS	357050000	85504000	271540000	17002000	4071600	12931000	111300000	245740000
39	gi|748750672;gi|1040645687;gi|1004658628;gi|281195183	gi|748750672;gi|1040645687;gi|1004658628;gi|281195183	hypothetical protein [Cylindrospermopsis raciborskii];hypothetical protein A9P98_09465 [Cylindrospermopsis raciborskii CS505];hypothetical protein [Cylindrospermopsis raciborskii];conserved hypothetical protein [Cylindrospermopsis raciborskii CS-505]	4	20.7813	24.2388	1.00574	1.14605	0.450253	2.00857	1.1395		1	1	1	1	11.5	13.374	113	0	6.0527	By matching	By MS/MS	21599000	1084600	20514000	2699900	135570	2564300	1802200	19797000
42	gi|493320173;gi|281194650;gi|1040645447;gi|1004658880	gi|493320173;gi|281194650;gi|1040645447;gi|1004658880	MULTISPECIES: ribose-5-phosphate isomerase [Cylindrospermopsis];Ribose 5-phosphate isomerase [Cylindrospermopsis raciborskii CS-505];ribose 5-phosphate isomerase A [Cylindrospermopsis raciborskii CS505];ribose 5-phosphate isomerase A [Cylindrospermopsis ra	4	21.9347	21.1103	1.06156	0.998128	1.00149	0.229682	0.940246		1	1	1	1	8.9	24.88	236	0	5.9667	By matching	By MS/MS	6272400	4008600	2263800	522700	334050	188650	4008600	2263800
44	gi|493318692;gi|281196165;gi|1040643822;gi|1004658886	gi|493318692;gi|281196165;gi|1040643822;gi|1004658886	hypothetical protein [Cylindrospermopsis raciborskii];conserved hypothetical protein [Cylindrospermopsis raciborskii CS-505];hypothetical protein A9P98_07355 [Cylindrospermopsis raciborskii CS505];hypothetical protein [Cylindrospermopsis raciborskii]	4	22.0163	21.4222	1.06551	1.01287	1.05983	0.285109	0.950597		1	1	1	1	9	15.729	145	0	5.9238	By MS/MS	By matching	7052200	4242100	2810100	783580	471350	312230	4242100	2810100
45	gi|1004658906	gi|1004658906	replicative DNA helicase, intein-containing [Cylindrospermopsis raciborskii]	1	20.5878	20.3495	0.996379	0.962155	0.39374	0.135549	0.965652		1	1	1	1	1.9	77.697	690	0	6.0083	By MS/MS	By matching	2912000	1576000	1336000	80888	43777	37111	1576000	1336000
47	gi|493320016;gi|281194825;gi|1040642964;gi|1004658989	gi|493320016;gi|281194825;gi|1040642964;gi|1004658989	peptidase S41 [Cylindrospermopsis raciborskii];Peptidase S41A [Cylindrospermopsis raciborskii CS-505];carboxyl-terminal protease [Cylindrospermopsis raciborskii CS505];carboxyl-terminal protease [Cylindrospermopsis raciborskii]	4	18.379	19.6249	0.88948	0.927894	0.0851713	0.0820292	1.04319		1	1	1	1	2.9	45.991	419	0	5.9241	By matching	By MS/MS	1149400	340910	808500	60495	17942	42552	340910	808500
48	gi|1004659052	gi|1004659052	isocitrate dehydrogenase (NADP(+)) [Cylindrospermopsis raciborskii]	1	21.2468	24.7727	1.02827	1.17129	0.62169	2.90811	1.13909		1	1	1	1	2.7	52.455	474	0	5.936	By matching	By MS/MS	31152000	2488400	28663000	1004900	80272	924620	2488400	28663000
57	gi|493318719;gi|281195968;gi|1040642723;gi|1004659310	gi|493318719;gi|281195968;gi|1040642723;gi|1004659310	serine/threonine protein kinase [Cylindrospermopsis raciborskii];Serine/Threonine protein kinase [Cylindrospermopsis raciborskii CS-505];serine/threonine protein kinase [Cylindrospermopsis raciborskii CS505];serine/threonine protein kinase [Cylindrospermop	4	22.9392	22.621	1.11018	1.06956	2.00932	0.654489	0.963411		1	1	1	1	2.1	71.471	624	0	6.0159	By MS/MS	By matching	14493000	8042600	6450800	483110	268090	215030	8042600	6450800
60	gi|1004659340;gi|748750074;gi|1040645545;gi|281195998	gi|1004659340;gi|748750074;gi|1040645545;gi|281195998	glycolate oxidase subunit GlcD [Cylindrospermopsis raciborskii];glycolate oxidase subunit GlcD [Cylindrospermopsis raciborskii];glycolate oxidase subunit GlcD [Cylindrospermopsis raciborskii CS505];Glycolate oxidase subunit GlcD [Cylindrospermopsis racibor	4	22.7114	21.4126	1.09915	1.01242	1.71577	0.283221	0.921094		1	1	1	1	2.6	52.987	495	0	6.2116	By MS/MS	By matching	9659100	6867600	2791500	482950	343380	139570	6867600	2791500
61	gi|493320858;gi|281194181;gi|1040642546;gi|1004659422	gi|493320858;gi|281194181;gi|1040642546;gi|1004659422	ATP synthase subunit alpha [Cylindrospermopsis raciborskii];ATP synthase subunit alpha [Cylindrospermopsis raciborskii CS-505];F0F1 ATP synthase subunit alpha [Cylindrospermopsis raciborskii CS505];F0F1 ATP synthase subunit alpha [Cylindrospermopsis racibo	4	21.9479	22.3423	1.0622	1.05638	1.01071	0.539506	0.994519		1	1	1	1	2.6	54.401	506	0	6.1689	By MS/MS	By MS/MS	9363000	3619500	5743500	425590	164520	261070	4045500	5317500
64	gi|748750536;gi|1040963501;gi|1040644591;gi|1040644590;gi|950122435;gi|1040644592;gi|1004659529	gi|748750536;gi|1040963501;gi|1040644591;gi|1040644590;gi|950122435;gi|1040644592;gi|1004659529	hypothetical protein [Cylindrospermopsis raciborskii];hypothetical protein [Cylindrospermopsis raciborskii];hypothetical protein A9P98_11890 [Cylindrospermopsis raciborskii CS505];hypothetical protein A9P98_11885 [Cylindrospermopsis raciborskii CS505];MULT	7	21.0656	22.8307	1.0195	1.07947	0.548313	0.756881	1.05882		1	1	1	1	16.2	8.1984	74	0	5.9309	By matching	By MS/MS	9654700	2194700	7460000	2413700	548680	1865000	2194700	7460000
67	gi|493321102;gi|281193825;gi|1040643563;gi|1004659733	gi|493321102;gi|281193825;gi|1040643563;gi|1004659733	MULTISPECIES: sulfate ABC transporter permease subunit CysW [Cylindrospermopsis];Sulfate ABC transporter, permease protein CysW [Cylindrospermopsis raciborskii CS-505];sulfate ABC transporter permease subunit CysW [Cylindrospermopsis raciborskii CS505];sul	4	21.7853	23.0901	1.05433	1.09174	0.903004	0.905974	1.03548		1	1	1	1	3.2	31.641	285	0	5.998	By MS/MS	By MS/MS	12544000	2258400	10285000	1568000	282300	1285700	3614400	8929500
70	gi|1004659884	gi|1004659884	NurA domain-containing protein [Cylindrospermopsis raciborskii]	1	17.3622	17.8987	0.84027	0.846278	0.0420922	0.0247934	1.00715		1	1	1	1	2.8	44.595	391	0	5.9561	By MS/MS	By matching	412850	168480	244370	20642	8424.1	12218	168480	244370
71	gi|1004659924	gi|1004659924	hypothetical protein [Cylindrospermopsis raciborskii]	1	20.0429	20.5266	0.970004	0.970528	0.269872	0.153253	1.00054		1	1	1	1	1.2	117.56	1009	0	5.961	By matching	By MS/MS	2590700	1080200	1510500	43178	18004	25175	1080200	1510500
73	gi|1004659987	gi|1004659987	oxidoreductase [Cylindrospermopsis raciborskii]	1	21.17	24.8862	1.02456	1.17666	0.589486	3.14623	1.14846		1	1	1	1	2.7	42.736	376	0	6.9976	By matching	By MS/MS	33370000	2359500	31010000	1516800	107250	1409600	2359500	31010000
76	gi|748750670;gi|1040645686;gi|1004660007;gi|281195169	gi|748750670;gi|1040645686;gi|1004660007;gi|281195169	amino acid ABC transporter substrate-binding protein [Cylindrospermopsis raciborskii];amino acid ABC transporter substrate-binding protein [Cylindrospermopsis raciborskii CS505];amino acid ABC transporter substrate-binding protein [Cylindrospermopsis racib	4	25.225	26.2143	1.2208	1.23945	9.79803	7.89905	1.01528		1	1	1	1	2.3	38.375	351	0	132.74	By MS/MS	By MS/MS	117070000	35571000	81502000	7317000	2223200	5093900	39218000	77855000
77	gi|1004660072	gi|1004660072	hypothetical protein [Cylindrospermopsis raciborskii]	1	24.3193	25.8082	1.17697	1.22025	5.2298	5.96109	1.03677		1	1	1	1	4.9	28.927	247	0	5.9624	By MS/MS	By MS/MS	146580000	38061000	108520000	8143100	2114500	6028700	20933000	58754000
79	gi|1004660094	gi|1004660094	polysaccharide deacetylase [Cylindrospermopsis raciborskii]	1	17.2063	19.9911	0.832724	0.945208	0.0377801	0.10573	1.13508		1	1	1	1	3	48.993	431	0	6.0599	By matching	By MS/MS	1193300	151220	1042100	47734	6048.7	41685	151220	1042100
82	gi|493319371;gi|281195585;gi|1040645356;gi|1004660275	gi|493319371;gi|281195585;gi|1040645356;gi|1004660275	ATP synthase subunit beta [Cylindrospermopsis raciborskii];ATP synthase F1, beta subunit [Cylindrospermopsis raciborskii CS-505];F0F1 ATP synthase subunit beta [Cylindrospermopsis raciborskii CS505];F0F1 ATP synthase subunit beta [Cylindrospermopsis racibo	4	23.3041	24.352	1.12784	1.1514	2.58754	2.17253	1.02089		1	1	1	1	2.3	51.9	482	0	6.0857	By MS/MS	By MS/MS	31770000	7293000	24477000	1270800	291720	979100	10357000	21413000
83	gi|493318671;gi|281196144;gi|1040643803;gi|1004660343	gi|493318671;gi|281196144;gi|1040643803;gi|1004660343	MULTISPECIES: glutamyl-tRNA reductase [Cylindrospermopsis];Glutamyl-tRNA reductase [Cylindrospermopsis raciborskii CS-505];glutamyl-tRNA reductase [Cylindrospermopsis raciborskii CS505];glutamyl-tRNA reductase [Cylindrospermopsis raciborskii]	4	22.7136	21.3512	1.09926	1.00952	1.71847	0.271422	0.918361		1	1	1	1	3	47.996	428	0	6.0378	By MS/MS	By matching	9553600	6112700	3440900	382140	244510	137630	6878400	2675200
86	gi|1004660759	gi|1004660759	hypothetical protein [Cylindrospermopsis raciborskii]	1	17.3652	20.5347	0.840415	0.970911	0.0421797	0.154115	1.15528		1	1	1	1	10	14.971	130	0	5.9463	By matching	By MS/MS	1687800	168830	1519000	187540	18759	168780	168830	1519000
92	gi|493318789;gi|281196038;gi|1040642783	gi|493318789;gi|281196038;gi|1040642783	hypothetical protein [Cylindrospermopsis raciborskii];conserved hypothetical protein [Cylindrospermopsis raciborskii CS-505];glycerate kinase [Cylindrospermopsis raciborskii CS505]	3	23.3853	24.7509	1.13177	1.17026	2.73744	2.86458	1.03401		1	1	1	1	3.7	40.07	355	0	5.9179	By MS/MS	By matching	39190000	10957000	28234000	2177200	608710	1568500	10957000	28234000
96	gi|493320294;gi|281194366;gi|1040643027	gi|493320294;gi|281194366;gi|1040643027	beta-carotene ketolase [Cylindrospermopsis raciborskii];FAD dependent oxidoreductase [Cylindrospermopsis raciborskii CS-505];beta-carotene ketolase [Cylindrospermopsis raciborskii CS505]	3	22.7872	24.1569	1.10282	1.14218	1.80841	1.89778	1.03568		1	1	1	1	2.3	62.708	567	0	5.9235	By MS/MS	By matching	25943000	5518100	20425000	763040	162300	600740	7238400	18705000
100	gi|493318421;gi|281196284;gi|1040643402	gi|493318421;gi|281196284;gi|1040643402	cytochrome b6 [Cylindrospermopsis raciborskii];Rieske (2Fe-2S) region protein [Cylindrospermopsis raciborskii CS-505];cytochrome B6 [Cylindrospermopsis raciborskii CS505]	3	16.969	20.284	0.821242	0.959058	0.0320513	0.129532	1.16781		1	1	1	1	9	15.506	144	0	5.9683	By matching	By MS/MS	1405000	128290	1276700	234170	21382	212790	128290	1276700
104	gi|493321065;gi|281193789;gi|1040643533	gi|493321065;gi|281193789;gi|1040643533	ATPase AAA [Cylindrospermopsis raciborskii];AAA ATPase, central region protein [Cylindrospermopsis raciborskii CS-505];AAA family ATPase [Cylindrospermopsis raciborskii CS505]	3	20.9048	21.2434	1.01172	1.00442	0.490501	0.251881	0.992785		1	1	1	1	6	37.934	334	0	5.9183	By MS/MS	By matching	4445900	1963300	2482600	234000	103330	130660	1963300	2482600
106	gi|602182153;gi|602182142;gi|493319514;gi|281195333;gi|161213723;gi|1040643629	gi|602182153;gi|602182142;gi|493319514;gi|281195333;gi|161213723;gi|1040643629	putative aminohydrolase [Cylindrospermopsis raciborskii CHAB3438];putative aminohydrolase [Cylindrospermopsis raciborskii CHAB358];aminohydrolase [Cylindrospermopsis raciborskii];Putative uracil ring formation (CyrG) [Cylindrospermopsis raciborskii CS-505]	6	20.4346	22.5355	0.988963	1.06551	0.354066	0.616797	1.0774		1	1	1	1	2.5	51.439	478	0	5.9536	By MS/MS	By MS/MS	7496600	1297400	6199100	374830	64872	309960	1417200	6079300
110	gi|493318646;gi|281196119;gi|1040643783	gi|493318646;gi|281196119;gi|1040643783	MULTISPECIES: 30S ribosomal protein S12 [Cylindrospermopsis];Ribosomal protein S12 [Cylindrospermopsis raciborskii CS-505];30S ribosomal protein S12 [Cylindrospermopsis raciborskii CS505]	3	22.3542	20.2113	1.08186	0.955623	1.33944	0.123171	0.883313		1	1	1	1	6.3	14.362	127	0	77.928	By MS/MS	By MS/MS	6575300	5533800	1041500	1643800	1383500	260360	5361300	1214000
111	gi|493318666;gi|281196139;gi|1040643798	gi|493318666;gi|281196139;gi|1040643798	ABC transporter ATP-binding protein [Cylindrospermopsis raciborskii];ABC transporter-like protein [Cylindrospermopsis raciborskii CS-505];mannose-1-phosphate guanyltransferase [Cylindrospermopsis raciborskii CS505]	3	25.0338	26.4254	1.21155	1.24943	8.58208	9.14364	1.03127		1	1	1	1	2.1	69.537	620	0	6.2776	By MS/MS	By MS/MS	124470000	27275000	97198000	4610100	1010200	3599900	34351000	90122000
116	gi|281196409;gi|748749678;gi|1040644428	gi|281196409;gi|748749678;gi|1040644428	hypothetical protein CRC_00519 [Cylindrospermopsis raciborskii CS-505];type I-D CRISPR-associated protein Cas10d/Csc3 [Cylindrospermopsis raciborskii];hypothetical protein A9P98_10880 [Cylindrospermopsis raciborskii CS505]	3	17.042	18.1149	0.824771	0.856498	0.0337127	0.028801	1.03847		1	1	1	1	1.2	121.7	1053	0	5.9771	By MS/MS	By matching	418810	134940	283870	7755.7	2498.8	5256.9	134940	283870
118	gi|493319668;gi|281195092;gi|1040644890	gi|493319668;gi|281195092;gi|1040644890	glutamine amidotransferase [Cylindrospermopsis raciborskii];CobB/CobQ-like protein glutamine amidotransferase [Cylindrospermopsis raciborskii CS-505];cobalamin biosynthesis protein CobQ [Cylindrospermopsis raciborskii CS505]	3	20.7373	21.6325	1.00361	1.02282	0.436712	0.329862	1.01914		1	1	1	1	4.9	29.212	265	0	5.9244	By MS/MS	By matching	4999300	1748000	3251200	333280	116540	216750	1748000	3251200
121	gi|493321767;gi|281193101;gi|1040645313	gi|493321767;gi|281193101;gi|1040645313	hypothetical protein [Cylindrospermopsis raciborskii];conserved hypothetical protein [Cylindrospermopsis raciborskii CS-505];hypothetical protein A9P98_16200 [Cylindrospermopsis raciborskii CS505]	3	17.8691	19.0676	0.864802	0.901546	0.059813	0.0557464	1.04249		1	1	1	1	2.9	47.268	410	0	5.9757	By MS/MS	By matching	788860	239410	549450	43826	13300	30525	239410	549450
125	gi|281194559;gi|748751232;gi|1040963641;gi|1040645796	gi|281194559;gi|748751232;gi|1040963641;gi|1040645796	conserved hypothetical protein [Cylindrospermopsis raciborskii CS-505];hypothetical protein, partial [Cylindrospermopsis raciborskii];hypothetical protein [Cylindrospermopsis raciborskii];hypothetical protein A9P98_14285 [Cylindrospermopsis raciborskii CS5	4	19.9887	23.1429	0.967383	1.09423	0.259928	0.939709	1.13113		1	1	1	1	6.7	21.699	193	0	5.9585	By matching	By MS/MS	10302000	1040400	9262000	936580	94583	842000	1040400	9262000
126	gi|493320998;gi|281193929	gi|493320998;gi|281193929	hypothetical protein [Cylindrospermopsis raciborskii];hypothetical protein CRC_03048 [Cylindrospermopsis raciborskii CS-505]	2	22.324	22.6662	1.0804	1.07169	1.31176	0.675298	0.991937		1	1	1	1	3.9	64.75	612	0	5.9441	By matching	By MS/MS	11906000	5250500	6655900	661470	291690	369770	5250500	6655900
129	gi|281195271	gi|281195271	hypothetical protein CRC_01656 [Cylindrospermopsis raciborskii CS-505]	1	20.8938	21.955	1.01119	1.03806	0.486754	0.412469	1.02658		1	1	1	1	20	7.241	65	0	5.9487	By MS/MS	By matching	6013700	1805900	4207800	3006800	902960	2103900	1948300	4065400
133	gi|602182160	gi|602182160	major facilitator superfamily transporter [Cylindrospermopsis raciborskii CHAB3438]	1	20.5353	23.7947	0.993834	1.12505	0.379649	1.47642	1.13203		1	1	1	1	2.8	51.322	467	0	5.9694	By MS/MS	By MS/MS	16072000	1519600	14552000	1461100	138150	1322900	1519600	14552000

## Sheet: Symka
			Minimal variation factor	50	%
					Sample 5	Sample 6			Sample 5	Sample 6
				Median	19.9596	19.7356		Sum of LFQ intensities	1113660742	1099575699
id	Protein IDs	Majority protein IDs	Protein names	Number of proteins	LFQ Sample 5 (log2(x))	LFQ Sample 6 (log2(x))	LFQ Sample 5 normalized	LFQ Sample 6 normalized	Abundance in Sample 5 [%]	Abundance in Sample 6 [%]	variation factor [LFQ Sample 6]/[LFQ Sample5]	possible variation between Samples	Peptides	Unique peptides	Unique peptides Sample5	Unique peptides Sample6	Sequence coverage [%]	Mol. weight [kDa]	Q-value	Score	Identification type Sample5	Identification type Sample6	Intensity	Intensity Sample5	Intensity Sample6	iBAQ	iBAQ Sample5	iBAQ Sample6	LFQ intensity Sample5	LFQ intensity Sample6
110	Skav215856;Skav227206;Skav227204	Skav215856;Skav227206;Skav227204	Skav215856 [mRNA] locus=scaffold1630:270527:272734:- [translate_table: standard];Skav227206 [mRNA] locus=scaffold2048:261433:263691:- [translate_table: standard];Skav227204 [mRNA] locus=scaffold2048:257491:259749:- [translate_table: standard]	3		20.1278		1.01987	n.d.	0.104195		?variant?	3	3	1	3	5.1	73.567	0	19.194	By matching	By MS/MS	4205900	1589500	2616400	127450	48168	79284	0	1145700
190	Skav228751;Skav228748	Skav228751	Skav228751 [mRNA] locus=scaffold1034:5469:6317:- [translate_table: standard]	2	19.5224	23.46	0.978096	1.18872	0.067622	1.0494	1.21534		3	3	1	3	9.9	30.776	0	19.546	By matching	By MS/MS	30460000	591290	29868000	1791700	34782	1757000	753080	11539000
13	Skav200601	Skav200601	Skav200601 [mRNA] locus=scaffold1278:144451:150332:- [translate_table: standard]	1		24.6237		1.24768	n.d.	2.351		?variant?	2	2	2	1	6.1	40	0	12.552	By MS/MS	By MS/MS	84446000	2787900	81658000	5277900	174250	5103600	0	25851000
17	Skav201543	Skav201543	Skav201543 [mRNA] locus=scaffold1616:146204:147099:+ [translate_table: standard]	1	21.6543	22.1335	1.0849	1.1215	0.296374	0.418443	1.03374		2	2	2	2	11.3	13.806	0	43.421	By MS/MS	By MS/MS	28698000	9751800	18946000	7174400	2438000	4736500	3300600	4601100
38	Skav203562	Skav203562	Skav203562 [mRNA] locus=scaffold3576:166022:166810:+ [translate_table: standard]	1		19.4367		0.984855	n.d.	0.0645358		?variant?	2	2	0	2	5.7	29.596	0	11.933		By MS/MS	2241500	0	2241500	186790	0	186790	0	709620
62	Skav221984;Skav215438;Skav229894;Skav209581;Skav219097;Skav207327	Skav221984;Skav215438;Skav229894;Skav209581;Skav219097;Skav207327	Skav221984 [mRNA] locus=scaffold195:1160661:1167817:- [translate_table: standard];Skav215438 [mRNA] locus=scaffold745:298483:311347:- [translate_table: standard];Skav229894 [mRNA] locus=scaffold2151:249946:251890:- [translate_table: standard];Skav209	6	27.5828	27.2754	1.38193	1.38204	18.0513	14.7739	1.00008		2	2	1	2	17.2	17.967	0	171.03	By MS/MS	By MS/MS	1906600000	802840000	1103800000	211840000	89204000	122640000	201030000	162450000
108	Skav215728;Skav203944;Skav234833;Skav220743	Skav215728;Skav203944;Skav234833;Skav220743	Skav215728 [mRNA] locus=scaffold1867:31443:41429:+ [translate_table: standard];Skav203944 [mRNA] locus=scaffold391:135806:145185:- [translate_table: standard];Skav234833 [mRNA] locus=scaffold69:1171761:1173861:- [translate_table: standard];Skav220743	4	20.694	19.4522	1.03679	0.985641	0.152326	0.0652333	0.950662		2	2	1	2	4.1	80.837	0	11.869	By MS/MS	By MS/MS	5085500	1587000	3498400	141260	44085	97178	1696400	717290
152	Skav221440;Skav221441;Skav221442;Skav229958	Skav221440;Skav221441;Skav221442;Skav229958	Skav221440 [mRNA] locus=scaffold140:89508:89744:+ [translate_table: standard];Skav221441 [mRNA] locus=scaffold140:90655:91190:+ [translate_table: standard];Skav221442 [mRNA] locus=scaffold140:91691:92236:+ [translate_table: standard];Skav229958 [mRN	4	22.0657	20.274	1.10551	1.02728	0.39416	0.115308	0.929235		2	2	2	2	33.3	8.584	0	18.555	By MS/MS	By matching	9286500	5695900	3590700	1857300	1139200	718130	4389600	1267900
168	Skav224235	Skav224235	Skav224235 [mRNA] locus=scaffold939:1274509:1279383:+ [translate_table: standard]	1	20.628	21.1305	1.03349	1.07068	0.145511	0.208781	1.03599		2	2	1	2	5.9	58.043	0	18.945	By MS/MS	By MS/MS	9207600	1951000	7256600	317500	67274	250230	1620500	2295700
204	Skav231489	Skav231489	Skav231489 [mRNA] locus=scaffold4318:11766:37863:+ [translate_table: standard]	1	27.8487	27.7789	1.39525	1.40756	21.7041	20.9444	1.00882		2	2	2	2	6.7	41.931	0	18.235	By MS/MS	By MS/MS	1002000000	274080000	727950000	55668000	15227000	40442000	241710000	230300000
10	Skav200029	Skav200029	Skav200029 [mRNA] locus=scaffold225:185947:189255:- [translate_table: standard]	1	20.6356		1.03386		0.146274	n.d.		?variant?	1	1	1	0	1.3	125.02	0.019608	6.0417	By MS/MS		1629000	1629000	0	28579	28579	0	1629000	0
11	Skav200130	Skav200130	Skav200130 [mRNA] locus=scaffold4172:99507:100508:+ [translate_table: standard]	1	18.2504	20.4183	0.914363	1.03459	0.0279996	0.12744	1.13149		1	1	1	1	4.2	36.871	0.014184	5.7992	By matching	By MS/MS	4738200	311820	4426400	278720	18342	260380	311820	1401300
12	Skav224835;Skav200574;Skav224741;Skav200570;Skav234867;Skav225926;Skav215254;Skav200842;Skav215257	Skav224835;Skav200574;Skav224741;Skav200570;Skav234867;Skav225926;Skav215254;Skav200842;Skav215257	Skav224835 [mRNA] locus=scaffold3408:239727:242461:+ [translate_table: standard];Skav200574 [mRNA] locus=scaffold917:265928:269527:- [translate_table: standard];Skav224741 [mRNA] locus=scaffold3343:99274:101354:- [translate_table: standard];Skav20057	9					n.d.	n.d.		?variant?	1	1	1	0	4.9	26.402	0.026667	5.8978	By MS/MS		0	0	0	0	0	0	0	0
14	Skav200907;Skav223507;Skav216399;Skav223518;Skav217333;Skav203223;Skav228582;Skav217345	Skav200907;Skav223507;Skav216399;Skav223518;Skav217333;Skav203223;Skav228582;Skav217345	Skav200907 [mRNA] locus=scaffold1581:345894:347649:+ [translate_table: standard];Skav223507 [mRNA] locus=scaffold1160:206258:215316:- [translate_table: standard];Skav216399 [mRNA] locus=scaffold457:301634:318818:+ [translate_table: standard];Skav2235	8	20.1441	21.2432	1.00924	1.07639	0.104044	0.225742	1.06653		1	1	1	1	3.2	49.993	0	25.27	By MS/MS	By MS/MS	8380500	1398400	6982100	380930	63566	317370	1158700	2482200
15	Skav200920	Skav200920	Skav200920 [mRNA] locus=scaffold2433:154039:159539:+ [translate_table: standard]	1	16.6455		0.83396		0.00920568	n.d.		?variant?	1	1	1	0	1.2	196.52	0.01087	5.7824	By MS/MS		102520	102520	0	1220.5	1220.5	0	102520	0
16	Skav201180	Skav201180	Skav201180 [mRNA] locus=scaffold2736:145225:149903:+ [translate_table: standard]	1	20.1906	18.189	1.01157	0.921633	0.107456	0.0271768	0.911089		1	1	1	1	0.9	167.53	0.019417	5.8334	By MS/MS	By matching	2140600	1196700	943910	37555	20995	16560	1196700	298830
18	Skav220401;Skav201545	Skav220401;Skav201545	Skav220401 [mRNA] locus=scaffold639:382839:383905:- [translate_table: standard];Skav201545 [mRNA] locus=scaffold1616:175454:175876:+ [translate_table: standard]	2	20.4434	21.4534	1.02424	1.08704	0.128037	0.261146	1.06131		1	1	1	1	7.8	14.238	0	8.7863	By MS/MS	By MS/MS	14797000	5019800	9777000	2959400	1004000	1955400	1425900	2871500
19	Skav201546	Skav201546	Skav201546 [mRNA] locus=scaffold1616:206400:213322:+ [translate_table: standard]	1		17.5477		0.889138	n.d.	0.017424		?variant?	1	1	0	1	1.4	94.973	0.01626	5.81		By MS/MS	605190	0	605190	13156	0	13156	0	191590
20	Skav201596	Skav201596	Skav201596 [mRNA] locus=scaffold152:687345:687734:+ [translate_table: standard]	1	17.3147	19.0219	0.867485	0.963838	0.0146382	0.0484105	1.11107		1	1	1	1	11.6	14.614	0.023256	6.1955	By matching	By MS/MS	1844400	163020	1681400	263490	23288	240200	163020	532310
21	Skav201644	Skav201644	Skav201644 [mRNA] locus=scaffold3087:221989:223278:+ [translate_table: standard]	1	21.1505	22.7543	1.05966	1.15296	0.209013	0.643448	1.08804		1	1	1	1	3	47.757	0.020202	5.8435	By MS/MS	By MS/MS	22678000	2543100	20135000	986010	110570	875440	2327700	7075200
22	Skav201822	Skav201822	Skav201822 [mRNA] locus=scaffold1071:375456:377057:+ [translate_table: standard]	1	19.8855	20.1497	0.996287	1.02098	0.0869744	0.105786	1.02479		1	1	1	1	2.6	60.484	0.011111	5.7844	By MS/MS	By matching	4154500	1498300	2656200	159790	57628	102160	968600	1163200
23	Skav201864	Skav201864	Skav201864 [mRNA] locus=scaffold3490:205574:212531:- [translate_table: standard]	1	23.6827	23.9886	1.18653	1.2155	1.20908	1.51377	1.02441		1	1	1	1	4.6	35.865	0.018018	5.823	By MS/MS	By MS/MS	64230000	17617000	46613000	3211500	880840	2330700	13465000	16645000
24	Skav201914	Skav201914	Skav201914 [mRNA] locus=scaffold3992:168698:172120:+ [translate_table: standard]	1	18.4875	19.7356	0.926244	1	0.033002	0.0793924	1.07963		1	1	1	1	5.8	23.252	0.009434	5.7725	By matching	By MS/MS	3125100	367530	2757500	240390	28272	212120	367530	872980
25	Skav201981	Skav201981	Skav201981 [mRNA] locus=scaffold2336:106502:106744:- [translate_table: standard]	1	20.5476	21.3666	1.02946	1.08264	0.137627	0.245904	1.05166		1	1	1	1	10	9.0333	0.015267	5.8048	By MS/MS	By matching	8545400	2370900	6174500	2136400	592720	1543600	1532700	2703900
26	Skav202061	Skav202061	Skav202061 [mRNA] locus=scaffold1138:563846:564352:- [translate_table: standard]	1	17.3691	19.1978	0.870209	0.97275	0.0152003	0.0546875	1.11784		1	1	1	1	16.9	9.9554	0.018182	5.8241	By MS/MS	By matching	2068700	169280	1899500	517180	42320	474860	169280	601330
27	Skav202217	Skav202217	Skav202217 [mRNA] locus=scaffold1756:48398:54661:+ [translate_table: standard]	1		19.4229		0.984157	n.d.	0.0639228		?variant?	1	1	0	1	8.3	30.136	0.013423	5.7929		By MS/MS	1605100	0	1605100	133760	0	133760	0	702880
28	Skav202575	Skav202575	Skav202575 [mRNA] locus=scaffold104:172463:172759:- [translate_table: standard]	1		17.1462		0.868795	n.d.	0.0131915		?variant?	1	1	0	1	17.3	11.29	0.010811	5.7822		By MS/MS	458170	0	458170	91635	0	91635	0	145050
29	Skav202771	Skav202771	Skav202771 [mRNA] locus=scaffold326:290972:295486:- [translate_table: standard]	1	17.9729		0.900463		0.0231013	n.d.		?variant?	1	1	1	0	1.3	140	0.0091743	5.7711	By MS/MS		397960	397960	0	6418.8	6418.8	0	257270	0
30	Skav202802	Skav202802	Skav202802 [mRNA] locus=scaffold326:834611:838825:- [translate_table: standard]	1		16.9908		0.860923	n.d.	0.0118446		?variant?	1	1	0	1	0.8	153.91	0.016393	5.8118		By MS/MS	411380	0	411380	6329	0	6329	0	130240
31	Skav202921;Skav208117	Skav202921;Skav208117	Skav202921 [mRNA] locus=scaffold1565:197372:205116:- [translate_table: standard];Skav208117 [mRNA] locus=scaffold2016:51900:74382:+ [translate_table: standard]	2	18.272	19.9805	0.915449	1.01241	0.0284234	0.0940817	1.10592		1	1	1	1	4.3	35.476	0	6.728	By matching	By MS/MS	2851900	489660	2362300	135810	23317	112490	316540	1034500
32	Skav202928	Skav202928	Skav202928 [mRNA] locus=scaffold1565:340874:341494:- [translate_table: standard]	1		25.9729		1.31605	n.d.	5.98976		?variant?	1	1	0	1	14.1	22.997	0.02439	5.8858		By MS/MS	154760000	0	154760000	17196000	0	17196000	0	65862000
33	Skav203013	Skav203013	Skav203013 [mRNA] locus=scaffold583:38588:44159:+ [translate_table: standard]	1	15.0947	17.2332	0.756263	0.873206	0.00314207	0.0140118	1.15463		1	1	1	1	6.7	19.268	0.022727	6.182	By matching	By MS/MS	521650	34992	486660	65207	4374	60832	34992	154070
34	Skav203233	Skav203233	Skav203233 [mRNA] locus=scaffold438:60200:61708:+ [translate_table: standard]	1		20.7271		1.05024	n.d.	0.157852		?variant?	1	1	0	1	2.4	52.763	0.0096154	5.7735		By MS/MS	5482700	0	5482700	456890	0	456890	0	1735700
35	Skav203434	Skav203434	Skav203434 [mRNA] locus=scaffold727:155203:161604:+ [translate_table: standard]	1	18.5727	17.9063	0.930513	0.90731	0.0350098	0.0223413	0.975065		1	1	1	1	2.4	34.87	0.018868	6.037	By MS/MS	By matching	1164100	603120	560980	83150	43080	40070	389890	245660
36	Skav231899;Skav230913;Skav203437;Skav214312	Skav231899;Skav230913;Skav203437;Skav214312	Skav231899 [mRNA] locus=scaffold960:171307:175415:- [translate_table: standard];Skav230913 [mRNA] locus=scaffold2578:51016:54924:+ [translate_table: standard];Skav203437 [mRNA] locus=scaffold1836:260356:264264:+ [translate_table: standard];Skav214312	4	19.5708		0.980519		0.069927	n.d.		?variant?	1	1	1	0	1.7	141.7	0.024096	5.8853	By MS/MS		1204600	1204600	0	16731	16731	0	778750	0
37	Skav203545;Skav209877	Skav203545;Skav209877	Skav203545 [mRNA] locus=scaffold220:180774:182793:+ [translate_table: standard];Skav209877 [mRNA] locus=scaffold1974:41463:43472:- [translate_table: standard]	2	17.7777		0.890683		0.0201776	n.d.		?variant?	1	1	1	0	1.1	72.177	0.010471	5.7801	By MS/MS		224710	224710	0	7248.7	7248.7	0	224710	0
39	Skav203581	Skav203581	Skav203581 [mRNA] locus=scaffold935:89412:94199:+ [translate_table: standard]	1	20.1871	20.2162	1.0114	1.02435	0.107196	0.110779	1.01281		1	1	1	1	0.4	176.28	0.015625	5.8085	By matching	By MS/MS	5109500	1549500	3560000	65506	19865	45641	1193800	1218100
40	Skav203935	Skav203935	Skav203935 [mRNA] locus=scaffold779:44713:49751:- [translate_table: standard]	1		18.9634		0.960874	n.d.	0.046487		?variant?	1	1	0	1	6.9	20.648	0.014286	5.7992		By MS/MS	1614600	0	1614600	124200	0	124200	0	511160
41	Skav204279	Skav204279	Skav204279 [mRNA] locus=scaffold409:167895:182082:+ [translate_table: standard]	1	18.4835	18.9222	0.926041	0.958788	0.0329095	0.0451792	1.03536		1	1	1	1	3.6	45.323	0	68.426	By MS/MS	By MS/MS	2324100	470610	1853500	86079	17430	68649	366500	496780
42	Skav204342	Skav204342	Skav204342 [mRNA] locus=scaffold55:359236:365401:+ [translate_table: standard]	1	19.5824	16.8499	0.981097	0.853782	0.0704892	0.0107423	0.870232		1	1	1	1	0.6	222.75	0.017241	5.8197	By MS/MS	By matching	1158100	785010	373120	11818	8010.3	3807.4	785010	118120
43	Skav204659	Skav204659	Skav204659 [mRNA] locus=scaffold949:229596:231877:+ [translate_table: standard]	1	20.2859	20.6716	1.01635	1.04743	0.114793	0.151895	1.03058		1	1	1	1	6.2	40.792	0.011834	5.7868	By MS/MS	By matching	5791600	1977600	3814000	275790	94169	181620	1278400	1670200
44	Skav204668	Skav204668	Skav204668 [mRNA] locus=scaffold607:133907:143512:- [translate_table: standard]	1					n.d.	n.d.		?variant?	1	1	0	1	12	29.269	0	7.563		By MS/MS	0	0	0	0	0	0	0	0
45	Skav204708	Skav204708	Skav204708 [mRNA] locus=scaffold3332:74506:81342:+ [translate_table: standard]	1		18.7316		0.949126	n.d.	0.0395853		?variant?	1	1	0	1	0.4	255.77	0.011299	5.7857		By MS/MS	1374900	0	1374900	11853	0	11853	0	435270
46	Skav205001	Skav205001	Skav205001 [mRNA] locus=scaffold3521:100694:103414:- [translate_table: standard]	1	21.2263		1.06346		0.220292	n.d.		?variant?	1	1	1	0	1.3	101.61	0.017241	5.9865	By MS/MS		3795000	3795000	0	86250	86250	0	2453300	0
47	Skav205139;Skav206113	Skav205139;Skav206113	Skav205139 [mRNA] locus=scaffold3411:179900:184204:- [translate_table: standard];Skav206113 [mRNA] locus=scaffold3261:44575:49089:+ [translate_table: standard]	2	20.2384	20.3075	1.01397	1.02898	0.111075	0.118018	1.01481		1	1	1	1	0.8	161.99	0.014925	5.9314	By MS/MS	By matching	4876900	1913500	2963400	72789	28560	44230	1237000	1297700
48	Skav205272	Skav205272	Skav205272 [mRNA] locus=scaffold1841:200125:207281:- [translate_table: standard]	1		19.3735		0.981653	n.d.	0.0617702		?variant?	1	1	0	1	3.3	74.851	0.0097561	5.7739		By MS/MS	2145400	0	2145400	65013	0	65013	0	679210
49	Skav205413	Skav205413	Skav205413 [mRNA] locus=scaffold170:119644:120270:- [translate_table: standard]	1		18.5891		0.941908	n.d.	0.0358638		?variant?	1	1	1	1	10.6	21.412	0.01227	5.7894	By matching	By MS/MS	1543800	298160	1245700	96488	18635	77853	0	394350
50	Skav205662	Skav205662	Skav205662 [mRNA] locus=scaffold458:317293:332839:+ [translate_table: standard]	1		20.7526		1.05153	n.d.	0.160671		?variant?	1	1	1	1	3	51.654	0.012658	5.7909	By MS/MS	By matching	4878000	843560	4034500	203250	35148	168100	0	1766700
51	Skav205867	Skav205867	Skav205867 [mRNA] locus=scaffold766:176181:182521:+ [translate_table: standard]	1					n.d.	n.d.		?variant?	1	1	1	0	1.9	69.696	0.018182	6.0007	By MS/MS		0	0	0	0	0	0	0	0
52	Skav211553;Skav210270;Skav211653;Skav205902	Skav211553;Skav210270;Skav211653;Skav205902	Skav211553 [mRNA] locus=scaffold871:303256:304494:- [translate_table: standard];Skav210270 [mRNA] locus=scaffold2977:1956:6397:+ [translate_table: standard];Skav211653 [mRNA] locus=scaffold6216:359:7387:+ [translate_table: standard];Skav205902 [mRNA	4	24.989	19.424	1.25198	0.98421	2.99014	0.0639692	0.786125		1	1	1	1	3.4	46.118	0.018519	5.8252	By matching	By MS/MS	53117000	51511000	1606200	3319800	3219400	100390	33300000	703390
53	Skav205987	Skav205987	Skav205987 [mRNA] locus=scaffold442:1074405:1084446:- [translate_table: standard]	1	21.0479	22.4613	1.05452	1.13811	0.194664	0.525184	1.07927		1	1	1	1	0.4	265.21	0.02	6.0871	By matching	By MS/MS	20409000	2167900	18241000	248890	26437	222450	2167900	5774800
54	Skav206312	Skav206312	Skav206312 [mRNA] locus=scaffold3460:26186:29314:+ [translate_table: standard]	1	22.082	20.2213	1.10633	1.02461	0.398649	0.11117	0.926132		1	1	1	1	1.2	112.29	0.015625	5.9596	By MS/MS	By matching	9659100	6867600	2791500	185750	132070	53682	4439600	1222400
55	Skav206359	Skav206359	Skav206359 [mRNA] locus=scaffold3448:259694:272924:- [translate_table: standard]	1	21.232	21.0737	1.06375	1.0678	0.221163	0.200723	1.00381		1	1	1	1	0.9	124.9	0.012739	5.7909	By MS/MS	By MS/MS	8850100	3810000	5040000	184380	79376	105000	2463000	2207100
56	Skav206494	Skav206494	Skav206494 [mRNA] locus=scaffold1128:161834:163927:+ [translate_table: standard]	1	20.837		1.04396		0.168193	n.d.		?variant?	1	1	1	0	3.3	77.353	0.012422	5.7901	By MS/MS		2897600	2897600	0	82787	82787	0	1873100	0
57	Skav206554	Skav206554	Skav206554 [mRNA] locus=scaffold925:21416:49383:+ [translate_table: standard]	1		19.7258		0.999505	n.d.	0.0788568		?variant?	1	1	0	1	0.7	247.4	0.010256	5.7791		By MS/MS	1980000	0	1980000	17838	0	17838	0	867090
58	Skav206723	Skav206723	Skav206723 [mRNA] locus=scaffold967:224487:226877:- [translate_table: standard]	1	21.0139	21.1233	1.05282	1.07031	0.190139	0.207735	1.01661		1	1	1	1	2.7	53.159	0.011905	5.7869	By MS/MS	By matching	8491700	3275500	5216200	314510	121320	193190	2117500	2284200
59	Skav206824	Skav206824	Skav206824 [mRNA] locus=scaffold3672:41448:45922:+ [translate_table: standard]	1	19.8304	17.7495	0.993527	0.899365	0.0837149	0.0200405	0.905225		1	1	1	1	1.7	79.362	0	7.5367	By MS/MS	By matching	1628400	932300	696050	58155	33296	24859	932300	220360
60	Skav206873	Skav206873	Skav206873 [mRNA] locus=scaffold898:132028:132786:- [translate_table: standard]	1	20.1035	20.3325	1.00721	1.03025	0.101162	0.120083	1.02287		1	1	1	1	4.8	27.686	0.017699	5.8222	By matching	By MS/MS	5297400	1126600	4170800	441450	93879	347570	1126600	1320400
61	Skav207315	Skav207315	Skav207315 [mRNA] locus=scaffold2296:325139:333057:+ [translate_table: standard]	1		18.7182		0.948447	n.d.	0.0392197		?variant?	1	1	0	1	0.5	282.88	0.010638	5.7811		By MS/MS	1362200	0	1362200	10479	0	10479	0	431250
63	Skav207858	Skav207858	Skav207858 [mRNA] locus=scaffold1988:10457:13664:+ [translate_table: standard]	1					n.d.	n.d.		?variant?	1	1	0	1	3	59.319	0.023529	5.8776		By MS/MS	0	0	0	0	0	0	0	0
64	Skav208234	Skav208234	Skav208234 [mRNA] locus=scaffold2601:170648:175295:+ [translate_table: standard]	1	21.7191	22.4159	1.08815	1.13581	0.309987	0.508887	1.0438		1	1	1	1	2.6	96.125	0.0098522	5.7756	By matching	By MS/MS	18118000	5340200	12778000	452950	133500	319450	3452200	5595600
65	Skav208381	Skav208381	Skav208381 [mRNA] locus=scaffold3508:70718:86061:+ [translate_table: standard]	1	24.9788	25.2788	1.25147	1.28087	2.96913	3.70206	1.0235		1	1	1	1	2.1	67.04	0	6.3544	By MS/MS	By MS/MS	192400000	45914000	146480000	6206300	1481100	4725300	33066000	40707000
66	Skav208472	Skav208472	Skav208472 [mRNA] locus=scaffold1104:318955:319725:+ [translate_table: standard]	1	16.6749	15.1117	0.835433	0.765706	0.00939514	0.00321988	0.916539		1	1	1	1	5.1	28.926	0.017094	5.818	By MS/MS	By matching	242700	161850	80850	26967	17983	8983.3	104630	35405
67	Skav208679	Skav208679	Skav208679 [mRNA] locus=scaffold775:199138:211981:+ [translate_table: standard]	1		19.3893		0.982455	n.d.	0.0624514		?variant?	1	1	0	1	1.9	69.283	0.010417	5.7801		By MS/MS	2169100	0	2169100	65731	0	65731	0	686700
68	Skav208953	Skav208953	Skav208953 [mRNA] locus=scaffold1580:170825:175496:- [translate_table: standard]	1	22.1184		1.10815		0.408823	n.d.		?variant?	1	1	1	0	4.4	21.902	0.017391	5.8204	By MS/MS		7042900	7042900	0	880360	880360	0	4552900	0
69	Skav208957	Skav208957	Skav208957 [mRNA] locus=scaffold1580:224229:225296:- [translate_table: standard]	1	22.881		1.14636		0.693613	n.d.		?variant?	1	1	1	0	7.6	33.383	0.016949	5.8172	By MS/MS		11949000	11949000	0	746810	746810	0	7724500	0
70	Skav208985	Skav208985	Skav208985 [mRNA] locus=scaffold1270:260958:263045:- [translate_table: standard]	1		23.3859		1.18496	n.d.	0.996839		?variant?	1	1	0	1	3.4	49.133	0	6.5433		By MS/MS	34621000	0	34621000	1505300	0	1505300	0	10961000
71	Skav209078	Skav209078	Skav209078 [mRNA] locus=scaffold207:207591:211020:- [translate_table: standard]	1	17.0555		0.854498		0.0122308	n.d.		?variant?	1	1	1	0	2.1	122.92	0.013793	5.7963	By MS/MS		210710	210710	0	4052.1	4052.1	0	136210	0
72	Skav209401	Skav209401	Skav209401 [mRNA] locus=scaffold962:136896:137591:- [translate_table: standard]	1		18.0173		0.912935	n.d.	0.0241284		?variant?	1	1	0	1	7.8	25.603	0.019802	5.8383		By MS/MS	838030	0	838030	69836	0	69836	0	265310
73	Skav209408	Skav209408	Skav209408 [mRNA] locus=scaffold2187:122689:123888:+ [translate_table: standard]	1	17.5175	20.7069	0.877648	1.04922	0.016848	0.15566	1.19549		1	1	1	1	4	44.985	0.014085	5.799	By matching	By MS/MS	5594000	187630	5406400	233080	7817.8	225270	187630	1711600
74	Skav209648;Skav209652;Skav209654;Skav209653;Skav209647	Skav209648;Skav209652;Skav209654;Skav209653;Skav209647	Skav209648 [mRNA] locus=scaffold650:99565:101255:- [translate_table: standard];Skav209652 [mRNA] locus=scaffold650:161600:164829:- [translate_table: standard];Skav209654 [mRNA] locus=scaffold650:200394:203625:- [translate_table: standard];Skav209653	5		18.0007		0.912093	n.d.	0.0238519		?variant?	1	1	0	1	4	41.708	0	9.0832		By MS/MS	828440	0	828440	37656	0	37656	0	262270
75	Skav210480	Skav210480	Skav210480 [mRNA] locus=scaffold737:661111:661950:- [translate_table: standard]	1	19.99	19.7027	1.00152	0.998334	0.0935024	0.0776036	0.99682		1	1	1	1	4.7	31.337	0.010152	5.7783	By matching	By MS/MS	3559300	1610700	1948600	222460	100670	121790	1041300	853310
76	Skav210571;Skav210569;Skav210567;Skav210565	Skav210571;Skav210569;Skav210567;Skav210565	Skav210571 [mRNA] locus=scaffold2317:166920:167621:+ [translate_table: standard];Skav210569 [mRNA] locus=scaffold2317:164994:165695:+ [translate_table: standard];Skav210567 [mRNA] locus=scaffold2317:161021:161722:+ [translate_table: standard];Skav210	4	22.9442	19.2776	1.14953	0.976793	0.724664	0.0577968	0.849733		1	1	1	1	3.4	25.585	0	6.4536	By MS/MS	By matching	12459000	11417000	1041500	1245900	1141700	104150	8070300	635520
77	Skav210674	Skav210674	Skav210674 [mRNA] locus=scaffold5572:15649:16377:- [translate_table: standard]	1		18.7355		0.949327	n.d.	0.0396944		?variant?	1	1	0	1	5.4	27.026	0.0090498	5.7702		By MS/MS	1378700	0	1378700	106050	0	106050	0	436470
78	Skav210697	Skav210697	Skav210697 [mRNA] locus=scaffold1240:56662:58086:+ [translate_table: standard]	1	23.1384	23.3932	1.15926	1.18533	0.829112	1.00193	1.02249		1	1	1	1	4.9	33.411	0.0092166	5.7712	By MS/MS	By matching	39442000	14283000	25159000	2191200	793520	1397700	9233500	11017000
79	Skav210981	Skav210981	Skav210981 [mRNA] locus=C8986052:14:940:- [translate_table: standard]	1	22.529	22.688	1.12873	1.1496	0.543433	0.614528	1.01849		1	1	1	1	3.9	33.639	0	15.024	By MS/MS	By MS/MS	26703000	7957100	18746000	4450500	1326200	3124300	6052000	6757200
80	Skav225826;Skav211119	Skav225826;Skav211119	Skav225826 [mRNA] locus=scaffold2516:55037:59475:- [translate_table: standard];Skav211119 [mRNA] locus=scaffold2659:123518:130322:- [translate_table: standard]	2					n.d.	n.d.		?variant?	1	1	1	0	0.6	158.65	0.015385	5.9391	By MS/MS		0	0	0	0	0	0	0	0
81	Skav211295	Skav211295	Skav211295 [mRNA] locus=C8695960:166:493:+ [translate_table: standard]	1	21.9364	22.3096	1.09904	1.13043	0.360379	0.472755	1.02856		1	1	1	1	17.5	7.4866	0	8.7701	By MS/MS	By MS/MS	20433000	4013400	16420000	4086700	802670	3284000	4013400	5198300
82	Skav211837	Skav211837	Skav211837 [mRNA] locus=scaffold305:669633:690103:- [translate_table: standard]	1	18.9351	19.655	0.948671	0.995918	0.0450083	0.0750808	1.0498		1	1	1	1	0.4	251.3	0.021277	6.1226	By matching	By MS/MS	3109000	501240	2607800	25908	4177	21731	501240	825570
83	Skav211889	Skav211889	Skav211889 [mRNA] locus=scaffold2402:77193:83007:- [translate_table: standard]	1	18.7158		0.937682		0.0386599	n.d.		?variant?	1	1	1	0	1.1	148.88	0.014388	5.8004	By MS/MS		430540	430540	0	6331.4	6331.4	0	430540	0
84	Skav212352	Skav212352	Skav212352 [mRNA] locus=scaffold3038:25852:31372:+ [translate_table: standard]	1	19.4651	18.77	0.975223	0.951073	0.0649875	0.0406539	0.975236		1	1	1	1	4.6	22.654	0	6.268	By MS/MS	By matching	2135800	723740	1412000	213580	72374	141200	723740	447020
85	Skav212560	Skav212560	Skav212560 [mRNA] locus=scaffold2398:27124:30585:+ [translate_table: standard]	1					n.d.	n.d.		?variant?	1	1	1	0	1	130.84	0.022472	5.87	By MS/MS		0	0	0	0	0	0	0	0
86	Skav212844	Skav212844	Skav212844 [mRNA] locus=scaffold325:118637:131588:+ [translate_table: standard]	1					n.d.	n.d.		?variant?	1	1	1	0	1.4	85.831	0.014815	5.8019	By MS/MS		0	0	0	0	0	0	0	0
87	Skav213019	Skav213019	Skav213019 [mRNA] locus=scaffold2312:208801:210147:+ [translate_table: standard]	1	20.5704	19.0716	1.0306	0.966358	0.139818	0.0501084	0.937664		1	1	1	1	4.5	49.102	0.012903	5.7913	By MS/MS	By matching	3666800	2408600	1258200	174610	114690	59914	1557100	550980
88	Skav213062	Skav213062	Skav213062 [mRNA] locus=scaffold364:558040:559530:- [translate_table: standard]	1		18.037		0.913932	n.d.	0.0244594		?variant?	1	1	0	1	1.4	55.012	0.01	5.7768		By MS/MS	614170	0	614170	30708	0	30708	0	268950
89	Skav213086	Skav213086	Skav213086 [mRNA] locus=scaffold1899:40496:49538:+ [translate_table: standard]	1	18.218	21.1006	0.912743	1.06916	0.0273791	0.204497	1.17138		1	1	1	1	6.6	17.88	0	8.7841	By MS/MS	By MS/MS	6104500	376190	5728300	610450	37619	572830	304910	2248600
90	Skav213363	Skav213363	Skav213363 [mRNA] locus=scaffold317:391135:401196:- [translate_table: standard]	1	19.2914	19.9565	0.966518	1.01119	0.0576136	0.0925266	1.04622		1	1	1	1	7.1	19.985	0.016129	5.8095	By MS/MS	By matching	3855200	641620	3213600	481900	80203	401700	641620	1017400
91	Skav213388	Skav213388	Skav213388 [mRNA] locus=scaffold797:366422:372108:- [translate_table: standard]	1		17.8984		0.90691	n.d.	0.0222195		?variant?	1	1	0	1	10.3	24.429	0.014599	5.8014		By MS/MS	557930	0	557930	50721	0	50721	0	244320
92	Skav213502	Skav213502	Skav213502 [mRNA] locus=scaffold3849:200835:203130:- [translate_table: standard]	1					n.d.	n.d.		?variant?	1	1	1	0	1.5	71.938	0	6.6012	By MS/MS		0	0	0	0	0	0	0	0
93	Skav213719	Skav213719	Skav213719 [mRNA] locus=scaffold2678:185861:188935:+ [translate_table: standard]	1	17.4012		0.871817		0.0155424	n.d.		?variant?	1	1	1	0	1.9	121.29	0.026316	5.8958	By MS/MS		173090	173090	0	2884.8	2884.8	0	173090	0
94	Skav213810	Skav213810	Skav213810 [mRNA] locus=scaffold1987:452197:454521:- [translate_table: standard]	1	19.3789	21.0525	0.970903	1.06673	0.061217	0.197794	1.0987		1	1	1	1	4.2	28.936	0.023256	5.873	By MS/MS	By MS/MS	6021100	1054600	4966500	401400	70306	331100	681750	2174900
95	Skav213865	Skav213865	Skav213865 [mRNA] locus=scaffold2366:336381:344444:- [translate_table: standard]	1		17.9428		0.909158	n.d.	0.0229134		?variant?	1	1	0	1	0.5	299.85	0.010989	5.7832		By MS/MS	795830	0	795830	6744.3	0	6744.3	0	251950
96	Skav214680	Skav214680	Skav214680 [mRNA] locus=scaffold923:716102:716416:- [translate_table: standard]	1		19.7193		0.999172	n.d.	0.0784985		?variant?	1	1	0	1	15.4	12.476	0.015748	5.809		By MS/MS	2726500	0	2726500	340810	0	340810	0	863150
97	Skav214720	Skav214720	Skav214720 [mRNA] locus=scaffold2250:237275:240060:+ [translate_table: standard]	1	21.2241	18.0542	1.06335	0.914804	0.21995	0.0247532	0.860305		1	1	1	1	6.4	16.889	0.020408	5.8492	By MS/MS	By matching	4410600	3789100	621550	441060	378910	62155	2449500	272180
98	Skav214775	Skav214775	Skav214775 [mRNA] locus=scaffold5578:11427:11579:- [translate_table: standard]	1	19.3809	20.0816	0.971005	1.01753	0.0613032	0.100912	1.04792		1	1	1	1	26	5.4845	0.024691	5.886	By MS/MS	By MS/MS	4049900	821610	3228300	1350000	273870	1076100	682710	1109600
99	Skav215203	Skav215203	Skav215203 [mRNA] locus=scaffold2331:123353:124517:- [translate_table: standard]	1					n.d.	n.d.		?variant?	1	1	0	1	7.9	19.528	0.018349	5.8248		By MS/MS	0	0	0	0	0	0	0	0
100	Skav215265	Skav215265	Skav215265 [mRNA] locus=scaffold2881:51787:60522:+ [translate_table: standard]	1		16.7217		0.847289	n.d.	0.00982925		?variant?	1	1	0	1	2.4	51.721	0.016529	5.8132		By MS/MS	341390	0	341390	12644	0	12644	0	108080
101	Skav215425	Skav215425	Skav215425 [mRNA] locus=scaffold745:2532:3818:+ [translate_table: standard]	1					n.d.	n.d.		?variant?	1	1	1	0	2.1	47.129	0.017857	5.9975	By MS/MS		0	0	0	0	0	0	0	0
102	Skav215474	Skav215474	Skav215474 [mRNA] locus=scaffold1089:880060:886109:- [translate_table: standard]	1		17.6363		0.893629	n.d.	0.0185281		?variant?	1	1	0	1	1.1	70.917	0.0095694	5.7734		By MS/MS	643520	0	643520	16501	0	16501	0	203730
103	Skav220298;Skav215529	Skav220298;Skav215529	Skav220298 [mRNA] locus=scaffold2356:74992:80879:- [translate_table: standard];Skav215529 [mRNA] locus=scaffold219:227036:232162:+ [translate_table: standard]	2	19.2658	19.5608	0.965236	0.991144	0.0566007	0.0703344	1.02684		1	1	1	1	0.8	149.47	0.021739	5.8631	By MS/MS	By matching	3073300	630340	2442900	48782	10005	38776	630340	773380
104	Skav215609	Skav215609	Skav215609 [mRNA] locus=scaffold666:503802:507830:- [translate_table: standard]	1	18.6352	18.385	0.933642	0.931567	0.0365587	0.0311329	0.997778		1	1	1	1	4	34.048	0.010204	5.7783	By MS/MS	By matching	1488500	407140	1081300	114500	31318	83180	407140	342330
105	Skav215683	Skav215683	Skav215683 [mRNA] locus=scaffold278:228630:233694:- [translate_table: standard]	1		18.0136		0.912748	n.d.	0.0240666		?variant?	1	1	0	1	4.2	38.066	0.011696	5.7863		By MS/MS	835900	0	835900	52244	0	52244	0	264630
106	Skav215700	Skav215700	Skav215700 [mRNA] locus=scaffold3538:124321:127815:+ [translate_table: standard]	1					n.d.	n.d.		?variant?	1	1	1	1	1.2	131.48	0.017544	5.9879	By MS/MS	By MS/MS	0	0	0	0	0	0	0	0
107	Skav215717	Skav215717	Skav215717 [mRNA] locus=scaffold2573:539234:547841:- [translate_table: standard]	1	18.1514		0.909403		0.0261426	n.d.		?variant?	1	1	1	0	9.1	24.924	0.027027	5.8997	By MS/MS		291140	291140	0	48523	48523	0	291140	0
109	Skav215790	Skav215790	Skav215790 [mRNA] locus=scaffold3885:23517:24559:+ [translate_table: standard]	1	22.9811	21.4216	1.15138	1.08543	0.743431	0.255453	0.942722		1	1	1	1	6.9	27.227	0.014493	5.9189	By MS/MS	By MS/MS	18050000	12062000	5987600	1388400	927850	460580	8279300	2808900
111	Skav215902	Skav215902	Skav215902 [mRNA] locus=scaffold1542:133361:133877:- [translate_table: standard]	1	20.4272	20.8563	1.02342	1.05679	0.1266	0.172639	1.0326		1	1	1	1	11.4	14.26	0.021739	6.1515	By MS/MS	By MS/MS	6944000	1943800	5000200	868000	242970	625030	1409900	1898300
112	Skav215963	Skav215963	Skav215963 [mRNA] locus=scaffold226:1132471:1133328:+ [translate_table: standard]	1					n.d.	n.d.		?variant?	1	1	1	0	5.6	30.522	0.010695	5.7813	By MS/MS		0	0	0	0	0	0	0	0
113	Skav216076	Skav216076	Skav216076 [mRNA] locus=scaffold1111:55033:74600:+ [translate_table: standard]	1		17.5752		0.890533	n.d.	0.0177596		?variant?	1	1	0	1	1.9	159.84	0.020408	6.0966		By MS/MS	616840	0	616840	14687	0	14687	0	195280
114	Skav216412	Skav216412	Skav216412 [mRNA] locus=scaffold457:527570:529213:+ [translate_table: standard]	1	20.7184	20.9013	1.03802	1.05907	0.154922	0.178114	1.02028		1	1	1	1	1.8	63.104	0	8.2587	By MS/MS	By MS/MS	7911800	1725300	6186400	282560	61619	220940	1725300	1958500
115	Skav216808	Skav216808	Skav216808 [mRNA] locus=scaffold135:18520:21602:+ [translate_table: standard]	1	19.9645	20.5358	1.00024	1.04055	0.0918682	0.138253	1.04029		1	1	1	1	1.7	85.952	0.0095238	5.773	By MS/MS	By matching	5054100	1582600	3471500	117540	36804	80732	1023100	1520200
116	Skav216844	Skav216844	Skav216844 [mRNA] locus=scaffold2788:63372:64558:+ [translate_table: standard]	1	22.6427	21.5359	1.13442	1.09122	0.588007	0.276525	0.961917		1	1	1	1	9.5	14.265	0.015152	5.9377	By matching	By MS/MS	16153000	6548400	9604400	1794800	727600	1067200	6548400	3040600
117	Skav217109	Skav217109	Skav217109 [mRNA] locus=scaffold1627:183318:189509:- [translate_table: standard]	1	18.4512		0.924426		0.0321822	n.d.		?variant?	1	1	1	0	1	134.87	0.018868	5.8259	By MS/MS		358400	358400	0	6892.3	6892.3	0	358400	0
118	Skav217298	Skav217298	Skav217298 [mRNA] locus=scaffold1466:191191:192621:+ [translate_table: standard]	1		20.3062		1.02891	n.d.	0.117909		?variant?	1	1	1	1	4.6	52.301	0.021277	5.8618	By matching	By MS/MS	7115700	4155000	2960700	444730	259690	185040	0	1296500
119	Skav217794;Skav225748;Skav217793	Skav217794;Skav225748;Skav217793	Skav217794 [mRNA] locus=scaffold1782:365669:366524:- [translate_table: standard];Skav225748 [mRNA] locus=scaffold28:123562:124689:- [translate_table: standard];Skav217793 [mRNA] locus=scaffold1782:357952:363979:- [translate_table: standard]	3		20.266		1.02688	n.d.	0.114672		?variant?	1	1	0	1	3.5	25.454	0.022727	5.8711		By MS/MS	3982900	0	3982900	331910	0	331910	0	1260900
120	Skav217812	Skav217812	Skav217812 [mRNA] locus=scaffold889:69820:83430:+ [translate_table: standard]	1	18.1341		0.908536		0.025831	n.d.		?variant?	1	1	1	0	4.4	37.86	0.0094787	5.7728	By MS/MS		445000	445000	0	26176	26176	0	287670	0
121	Skav217821	Skav217821	Skav217821 [mRNA] locus=scaffold889:245032:254211:+ [translate_table: standard]	1	20.7756	21.036	1.04088	1.06589	0.161189	0.195548	1.02403		1	1	1	1	4.7	39.471	0.022222	5.8663	By MS/MS	By MS/MS	8586900	1795100	6791800	429340	89753	339590	1795100	2150200
122	Skav217861	Skav217861	Skav217861 [mRNA] locus=scaffold5889:125136:126458:+ [translate_table: standard]	1		20.9084		1.05943	n.d.	0.178996		?variant?	1	1	1	1	5.2	49.51	0.012048	5.7878	By MS/MS	By MS/MS	6292900	1798500	4494500	299660	85641	214020	0	1968200
123	Skav217863	Skav217863	Skav217863 [mRNA] locus=scaffold5889:136466:138755:- [translate_table: standard]	1		17.7405		0.898909	n.d.	0.0199159		?variant?	1	1	0	1	1.7	80.247	0.013605	5.7948		By MS/MS	691720	0	691720	19763	0	19763	0	218990
124	Skav217939	Skav217939	Skav217939 [mRNA] locus=scaffold1737:132056:137335:- [translate_table: standard]	1	19.9594	20.9409	0.999989	1.06107	0.0915449	0.183071	1.06109		1	1	1	1	1.1	200.1	0.0093897	5.7721	By MS/MS	By matching	6173800	1577100	4596800	66385	16958	49428	1019500	2013000
125	Skav218026	Skav218026	Skav218026 [mRNA] locus=scaffold214:68164:74339:+ [translate_table: standard]	1					n.d.	n.d.		?variant?	1	1	0	1	3.2	97.797	0.022222	6.1555		By MS/MS	0	0	0	0	0	0	0	0
126	Skav218165	Skav218165	Skav218165 [mRNA] locus=scaffold5213:66233:75512:- [translate_table: standard]	1					n.d.	n.d.		?variant?	1	1	1	0	1.8	61.337	0.016807	5.8148	By MS/MS		0	0	0	0	0	0	0	0
127	Skav218272	Skav218272	Skav218272 [mRNA] locus=scaffold2035:302107:302451:- [translate_table: standard]	1	19.497	17.8737	0.97682	0.905658	0.0664385	0.0218421	0.92715		1	1	1	1	12.3	12.422	0.010309	5.7796	By MS/MS	By matching	1693000	1144500	548440	338600	228910	109690	739900	240170
128	Skav218358	Skav218358	Skav218358 [mRNA] locus=scaffold2066:32651:41400:+ [translate_table: standard]	1		18.5801		0.941451	n.d.	0.0356401		?variant?	1	1	0	1	2.7	47.92	0.019231	5.8326		By MS/MS	1237900	0	1237900	53821	0	53821	0	391890
129	Skav218415	Skav218415	Skav218415 [mRNA] locus=scaffold4660:8100:9778:- [translate_table: standard]	1		18.751		0.950111	n.d.	0.0401227		?variant?	1	1	0	1	3	52.748	0.011765	5.7868		By MS/MS	1393600	0	1393600	73346	0	73346	0	441180
130	Skav218844	Skav218844	Skav218844 [mRNA] locus=scaffold3958:45653:60387:+ [translate_table: standard]	1	20.034	21.2584	1.00373	1.07716	0.0964028	0.228133	1.07316		1	1	1	1	1.8	70.519	0.0090909	5.7705	By matching	By MS/MS	9206000	1213000	7992900	317450	41829	275620	1073600	2508500
131	Skav218899	Skav218899	Skav218899 [mRNA] locus=scaffold328:302270:303352:+ [translate_table: standard]	1		19.0961		0.9676	n.d.	0.0509669		?variant?	1	1	0	1	3.1	41.141	0.022989	5.872		By MS/MS	1770200	0	1770200	84296	0	84296	0	560420
132	Skav218929	Skav218929	Skav218929 [mRNA] locus=scaffold678:39018:56391:+ [translate_table: standard]	1	22.5233	23.1812	1.12844	1.17459	0.541287	0.864961	1.04089		1	1	1	1	1.3	103.72	0.014286	5.9146	By MS/MS	By matching	31044000	9324900	21719000	705540	211930	493610	6028100	9510900
133	Skav219079	Skav219079	Skav219079 [mRNA] locus=scaffold1777:76747:78530:- [translate_table: standard]	1	20.9456	17.6646	1.0494	0.895061	0.181348	0.0188946	0.852927		1	1	1	1	2.8	48.103	0.011236	5.7851	By MS/MS	By matching	3579800	2923600	656260	188410	153870	34540	2019600	207760
134	Skav219151	Skav219151	Skav219151 [mRNA] locus=scaffold1574:827431:831790:+ [translate_table: standard]	1	18.3277	15.2155	0.918237	0.770969	0.0295413	0.00346024	0.839619		1	1	1	1	0.5	157.44	0.012821	5.7909	By MS/MS	By matching	449180	328990	120180	5685.8	4164.5	1521.3	328990	38048
135	Skav219157	Skav219157	Skav219157 [mRNA] locus=scaffold1574:869264:879006:- [translate_table: standard]	1	19.7649	19.5752	0.990241	0.991872	0.0799947	0.0710383	1.00165		1	1	1	1	4.1	54.923	0.0091324	5.7706	By MS/MS	By matching	3161800	1378100	1783700	126470	55124	71349	890870	781120
136	Skav219169	Skav219169	Skav219169 [mRNA] locus=scaffold648:327102:332723:- [translate_table: standard]	1	19.826		0.993304		0.0834572	n.d.		?variant?	1	1	1	0	1.3	129.48	0.020619	5.8558	By MS/MS		929430	929430	0	17212	17212	0	929430	0
137	Skav219709	Skav219709	Skav219709 [mRNA] locus=scaffold776:140219:157425:- [translate_table: standard]	1	19.9599	17.9139	1.00001	0.907696	0.0915719	0.0224596	0.907686		1	1	1	1	6	22.694	0.013333	5.7927	By MS/MS	By matching	1799900	1019800	780080	359970	203960	156020	1019800	246960
138	Skav219737	Skav219737	Skav219737 [mRNA] locus=scaffold301:456642:481282:- [translate_table: standard]	1	20.9792	20.6008	1.05108	1.04384	0.185622	0.144619	0.993108		1	1	1	1	0.7	202.39	0.017544	5.8219	By MS/MS	By matching	7090100	2067200	5022900	69511	20266	49244	2067200	1590200
139	Skav220153	Skav220153	Skav220153 [mRNA] locus=scaffold564:39495:54090:+ [translate_table: standard]	1	19.9223	20.4831	0.99813	1.03787	0.0892202	0.133288	1.03982		1	1	1	1	0.6	303.6	0.016949	5.9853	By matching	By MS/MS	5132600	1367600	3764900	47088	12547	34541	993610	1465600
140	Skav220229	Skav220229	Skav220229 [mRNA] locus=scaffold749:228750:255086:- [translate_table: standard]	1	21.8971	18.9257	1.09707	0.958964	0.35069	0.0452884	0.874116		1	1	1	1	0.8	146.51	0.02	5.8433	By MS/MS	By MS/MS	5478400	3905500	1573000	75047	53499	21548	3905500	497980
141	Skav224751;Skav220399	Skav224751;Skav220399	Skav224751 [mRNA] locus=scaffold580:312813:313211:- [translate_table: standard];Skav220399 [mRNA] locus=scaffold639:381474:381944:- [translate_table: standard]	2	24.245	24.0978	1.2147	1.22103	1.78528	1.63281	1.00521		2	1	1	1	16.7	14.183	0	15.682	By MS/MS	By MS/MS	116020000	35991000	80028000	16574000	5141600	11433000	19882000	17954000
142	Skav224752;Skav220400;Skav220403	Skav224752;Skav220400;Skav220403	Skav224752 [mRNA] locus=scaffold580:316069:316503:- [translate_table: standard];Skav220400 [mRNA] locus=scaffold639:382133:382576:- [translate_table: standard];Skav220403 [mRNA] locus=scaffold639:389144:392436:- [translate_table: standard]	3		21.8806		1.10869	n.d.	0.351145		?variant?	2	1	1	1	15.3	15.745	0	10.852	By MS/MS	By MS/MS	25784000	5095500	20689000	3223000	636940	2586100	0	3861100
143	Skav224750;Skav220402	Skav224750;Skav220402	Skav224750 [mRNA] locus=scaffold580:294106:294732:- [translate_table: standard];Skav220402 [mRNA] locus=scaffold639:385553:388844:- [translate_table: standard]	2	28.3397	27.9597	1.41985	1.41671	30.503	23.7401	0.997792		1	1	1	1	11	12.736	0	7.4517	By MS/MS	By MS/MS	2083500000	766050000	1317400000	260440000	95757000	164680000	339700000	261040000
144	Skav220699	Skav220699	Skav220699 [mRNA] locus=scaffold472:609759:621849:+ [translate_table: standard]	1					n.d.	n.d.		?variant?	1	1	0	1	5.4	33.582	0.011364	5.786		By MS/MS	0	0	0	0	0	0	0	0
145	Skav220732	Skav220732	Skav220732 [mRNA] locus=scaffold2753:244342:251589:- [translate_table: standard]	1	19.4531		0.974623		0.0644496	n.d.		?variant?	1	1	1	0	3.8	48.103	0.018692	5.8257	By MS/MS		717750	717750	0	29906	29906	0	717750	0
146	Skav220863	Skav220863	Skav220863 [mRNA] locus=scaffold193:242455:249358:+ [translate_table: standard]	1		19.5289		0.989526	n.d.	0.0687947		?variant?	1	1	0	1	9	15.539	0.012195	5.789		By MS/MS	2389400	0	2389400	398240	0	398240	0	756450
147	Skav221048	Skav221048	Skav221048 [mRNA] locus=scaffold1448:307985:309760:+ [translate_table: standard]	1					n.d.	n.d.		?variant?	1	1	1	0	2.7	66.244	0.027778	5.9057	By MS/MS		0	0	0	0	0	0	0	0
148	Skav221079	Skav221079	Skav221079 [mRNA] locus=scaffold3118:484374:484757:- [translate_table: standard]	1		18.4814		0.936449	n.d.	0.0332828		?variant?	1	1	0	1	9.4	14.463	0.011561	5.7862		By MS/MS	1156000	0	1156000	192660	0	192660	0	365970
149	Skav221162	Skav221162	Skav221162 [mRNA] locus=scaffold85:207301:216528:+ [translate_table: standard]	1		24.1469		1.22352	n.d.	1.68929		?variant?	1	1	0	1	0.9	279.97	0.013514	5.7943		By MS/MS	42417000	0	42417000	432830	0	432830	0	18575000
150	Skav221253	Skav221253	Skav221253 [mRNA] locus=scaffold1045:682679:688780:+ [translate_table: standard]	1	19.7054		0.987264		0.0767666	n.d.		?variant?	1	1	1	0	2	81.283	0	6.967	By MS/MS		854920	854920	0	23748	23748	0	854920	0
151	Skav221393	Skav221393	Skav221393 [mRNA] locus=scaffold1029:181234:182634:+ [translate_table: standard]	1	18.9102	19.1299	0.947423	0.96931	0.0442379	0.0521738	1.0231		1	1	1	1	3.2	51.122	0.02381	6.251	By matching	By MS/MS	2304800	492660	1812100	121310	25929	95376	492660	573690
153	Skav221612	Skav221612	Skav221612 [mRNA] locus=scaffold1327:43934:50174:- [translate_table: standard]	1	19.7183	17.5713	0.987909	0.890338	0.0774554	0.0177123	0.901234		1	1	1	1	0.6	202.14	0.016667	5.9732	By MS/MS	By matching	1477800	862590	615200	15080	8801.9	6277.6	862590	194760
154	Skav221688	Skav221688	Skav221688 [mRNA] locus=scaffold1494:288665:292160:+ [translate_table: standard]	1					n.d.	n.d.		?variant?	1	1	1	0	4.3	24.649	0.012579	5.7908	By MS/MS		0	0	0	0	0	0	0	0
155	Skav222081	Skav222081	Skav222081 [mRNA] locus=scaffold2165:4585:5484:- [translate_table: standard]	1	19.1898		0.961428		0.0536959	n.d.		?variant?	1	1	1	0	7.7	34.7	0.017857	5.8228	By MS/MS		597990	597990	0	74749	74749	0	597990	0
156	Skav222397	Skav222397	Skav222397 [mRNA] locus=scaffold4422:233805:265450:+ [translate_table: standard]	1		19.42		0.984008	n.d.	0.0637928		?variant?	1	1	0	1	5.6	28.434	0.015873	5.8093		By MS/MS	2215700	0	2215700	170440	0	170440	0	701450
157	Skav222463	Skav222463	Skav222463 [mRNA] locus=scaffold5414:30010:47306:- [translate_table: standard]	1	18.9472	19.4597	0.949276	0.986021	0.0453864	0.0655735	1.03871		1	1	1	1	1.9	89.046	0.013245	5.7923	By MS/MS	By MS/MS	2708900	630170	2078700	77397	18005	59392	505450	721030
158	Skav222528	Skav222528	Skav222528 [mRNA] locus=scaffold2875:82275:83045:+ [translate_table: standard]	1		17.8189		0.902882	n.d.	0.0210281		?variant?	1	1	0	1	5.5	28.97	0.015504	5.8065		By MS/MS	730380	0	730380	56183	0	56183	0	231220
159	Skav222627	Skav222627	Skav222627 [mRNA] locus=scaffold10:70765:71106:- [translate_table: standard]	1	19.7206	18.4152	0.988024	0.933095	0.0775784	0.0317904	0.944405		1	1	1	1	11.5	12.515	0.0125	5.7901	By MS/MS	By matching	2134700	1336500	798250	355780	222740	133040	863960	349560
160	Skav222940	Skav222940	Skav222940 [mRNA] locus=scaffold1489:503418:516491:- [translate_table: standard]	1	20.1778	21.1065	1.01093	1.06946	0.106505	0.205334	1.0579		1	1	1	1	3.1	55.62	0	33.63	By matching	By MS/MS	7703000	1493300	6209700	285300	55309	229990	1186100	2257800
161	Skav223163	Skav223163	Skav223163 [mRNA] locus=scaffold3747:46902:47672:+ [translate_table: standard]	1	20.051	21.8682	1.00458	1.10806	0.0975432	0.348143	1.10301		1	1	1	1	6.2	27.939	0.014706	5.9217	By MS/MS	By matching	10422000	1680400	8741800	694810	112030	582780	1086300	3828100
162	Skav223259	Skav223259	Skav223259 [mRNA] locus=scaffold1037:143604:157559:- [translate_table: standard]	1	18.6047	18.1427	0.932114	0.919289	0.0357937	0.0263192	0.986241		1	1	1	1	4.2	57.124	0.025641	5.8923	By MS/MS	By matching	1312800	398620	914140	50491	15332	35159	398620	289400
163	Skav223469	Skav223469	Skav223469 [mRNA] locus=scaffold2550:57281:65735:+ [translate_table: standard]	1	19.6811		0.986045		0.0754835	n.d.		?variant?	1	1	1	1	5.3	18.557	0	8.534	By MS/MS	By MS/MS	840630	840630	0	105080	105080	0	840630	0
164	Skav223602	Skav223602	Skav223602 [mRNA] locus=scaffold493:442399:446367:+ [translate_table: standard]	1	18.3219		0.917949		0.0294237	n.d.		?variant?	1	1	1	0	1.2	145.16	0.0092593	5.7714	By MS/MS		327680	327680	0	5041.3	5041.3	0	327680	0
165	Skav223935	Skav223935	Skav223935 [mRNA] locus=scaffold2593:541986:543434:+ [translate_table: standard]	1					n.d.	n.d.		?variant?	1	1	0	1	2.9	52.594	0.014706	5.8014		By MS/MS	0	0	0	0	0	0	0	0
166	Skav224128	Skav224128	Skav224128 [mRNA] locus=scaffold2427:412354:420008:- [translate_table: standard]	1		19.8103		1.00379	n.d.	0.0836132		?variant?	1	1	0	1	4.1	35.972	0.0097087	5.7739		By MS/MS	2904100	0	2904100	161340	0	161340	0	919390
167	Skav224227	Skav224227	Skav224227 [mRNA] locus=scaffold939:1185730:1190316:+ [translate_table: standard]	1					n.d.	n.d.		?variant?	1	1	1	0	0.6	167.04	0.021978	5.8632	By MS/MS		0	0	0	0	0	0	0	0
169	Skav224493	Skav224493	Skav224493 [mRNA] locus=scaffold1294:141294:158669:+ [translate_table: standard]	1		21.1362		1.07097	n.d.	0.209608		?variant?	1	1	0	1	4.8	27.462	0.0093023	5.7716		By MS/MS	7280100	0	7280100	560010	0	560010	0	2304800
170	Skav224731	Skav224731	Skav224731 [mRNA] locus=scaffold699:573890:588190:- [translate_table: standard]	1	19.5408		0.979013		0.0684858	n.d.		?variant?	1	1	1	0	0.5	308.88	0.019048	5.8307	By MS/MS		762700	762700	0	4679.1	4679.1	0	762700	0
171	Skav224903	Skav224903	Skav224903 [mRNA] locus=scaffold1112:428999:432383:- [translate_table: standard]	1		21.37		1.08281	n.d.	0.246477		?variant?	1	1	1	1	4.3	41.937	0.020833	6.0968	By MS/MS	By matching	9219000	2266600	6952400	768250	188880	579360	0	2710200
172	Skav225018	Skav225018	Skav225018 [mRNA] locus=scaffold3954:79576:81003:- [translate_table: standard]	1					n.d.	n.d.		?variant?	1	1	0	1	3.2	53.504	0.0099502	5.7765		By MS/MS	0	0	0	0	0	0	0	0
173	Skav225121	Skav225121	Skav225121 [mRNA] locus=scaffold1239:278040:279794:- [translate_table: standard]	1		19.5588		0.991042	n.d.	0.0702362		?variant?	1	1	0	1	3.8	66.924	0.01105	5.7836		By MS/MS	2439500	0	2439500	81316	0	81316	0	772300
174	Skav225394	Skav225394	Skav225394 [mRNA] locus=scaffold2656:253342:256944:- [translate_table: standard]	1	22.4103	21.1053	1.12278	1.0694	0.50052	0.20517	0.952461		1	1	1	1	1.8	136.16	0.013889	5.7964	By matching	By MS/MS	13774000	8622500	5151800	202560	126800	75762	5574100	2256000
175	Skav225821	Skav225821	Skav225821 [mRNA] locus=scaffold1814:50714:55862:+ [translate_table: standard]	1		21.3766		1.08315	n.d.	0.247614		?variant?	1	1	0	1	1	139.81	0.016667	5.8134		By MS/MS	8600200	0	8600200	153570	0	153570	0	2722700
176	Skav226293	Skav226293	Skav226293 [mRNA] locus=scaffold3301:263788:268242:+ [translate_table: standard]	1		16.467		0.834381	n.d.	0.00823827		?variant?	1	1	0	1	1.1	165	0.014493	5.8008		By MS/MS	286140	0	286140	4270.7	0	4270.7	0	90586
177	Skav226361	Skav226361	Skav226361 [mRNA] locus=scaffold290:9058:10437:+ [translate_table: standard]	1		18.5952		0.942215	n.d.	0.0360148		?variant?	1	1	1	1	4.8	50.213	0.012346	5.7895	By MS/MS	By matching	3288300	2384000	904320	164420	119200	45216	0	396010
178	Skav226417	Skav226417	Skav226417 [mRNA] locus=scaffold3528:66294:66821:- [translate_table: standard]	1	20.6642	21.2246	1.0353	1.07545	0.149211	0.22285	1.03878		1	1	1	1	8	18.261	0	15.713	By MS/MS	By MS/MS	9181700	1995300	7186500	1020200	221690	798500	1661700	2450400
179	Skav226532	Skav226532	Skav226532 [mRNA] locus=scaffold1773:297641:298705:- [translate_table: standard]	1	19.1188		0.957871		0.051117	n.d.		?variant?	1	1	1	0	4.5	38.505	0.014925	5.8035	By MS/MS		569270	569270	0	33486	33486	0	569270	0
180	Skav226598	Skav226598	Skav226598 [mRNA] locus=scaffold5607:41176:50933:+ [translate_table: standard]	1					n.d.	n.d.		?variant?	1	1	1	0	5.8	19.574	0.027397	5.9	By MS/MS		0	0	0	0	0	0	0	0
181	Skav226691	Skav226691	Skav226691 [mRNA] locus=scaffold3971:131026:134560:- [translate_table: standard]	1	18.3665	19.4102	0.920181	0.983513	0.0303468	0.0633617	1.06882		1	1	1	1	1.9	82.526	0.012987	5.7914	By matching	By MS/MS	2113800	522790	1591000	55625	13758	41868	337960	696710
182	Skav226782	Skav226782	Skav226782 [mRNA] locus=scaffold8:312961:326422:- [translate_table: standard]	1	22.3206	21.7599	1.11828	1.10257	0.470332	0.32297	0.98595		1	1	1	1	1.6	113.51	0.011628	5.7863	By matching	By MS/MS	16212000	8102400	8109500	324240	162050	162190	5237900	3551300
183	Skav226930	Skav226930	Skav226930 [mRNA] locus=scaffold3020:80637:85839:+ [translate_table: standard]	1		17.7949		0.901664	n.d.	0.0206807		?variant?	1	1	0	1	1.2	111.32	0.0093458	5.7716		By MS/MS	718290	0	718290	14366	0	14366	0	227400
184	Skav227150	Skav227150	Skav227150 [mRNA] locus=scaffold133:654696:659315:+ [translate_table: standard]	1					n.d.	n.d.		?variant?	1	1	1	0	7	26.486	0.011173	5.7844	By MS/MS		0	0	0	0	0	0	0	0
185	Skav227229	Skav227229	Skav227229 [mRNA] locus=scaffold4396:14477:17280:- [translate_table: standard]	1	18.2822		0.915961		0.0286254	n.d.		?variant?	1	1	1	0	3.7	47.079	0.010526	5.7802	By MS/MS		493130	493130	0	17612	17612	0	318790	0
186	Skav227450	Skav227450	Skav227450 [mRNA] locus=scaffold2491:114911:120840:+ [translate_table: standard]	1	18.8098		0.942393		0.0412639	n.d.		?variant?	1	1	1	0	1.7	147.36	0.012121	5.7881	By MS/MS		710860	710860	0	11107	11107	0	459540	0
187	Skav228079	Skav228079	Skav228079 [mRNA] locus=scaffold5285:60141:65243:- [translate_table: standard]	1	21.1708	20.6831	1.06068	1.04801	0.211977	0.153114	0.988056		1	1	1	1	4.9	26.808	0.013699	5.7963	By MS/MS	By matching	7496400	3651800	3844600	576650	280910	295740	2360700	1683600
188	Skav228350	Skav228350	Skav228350 [mRNA] locus=scaffold5397:11948:22479:+ [translate_table: standard]	1	17.0361		0.853526		0.0120674	n.d.		?variant?	1	1	1	0	2	82.135	0.015385	5.8064	By MS/MS		134390	134390	0	4799.6	4799.6	0	134390	0
189	Skav228691	Skav228691	Skav228691 [mRNA] locus=scaffold2247:435891:437237:- [translate_table: standard]	1	19.428	21.0689	0.973363	1.06756	0.0633362	0.200059	1.09678		1	1	1	1	5.6	49.919	0.013986	5.7969	By matching	By MS/MS	6114500	1091100	5023400	265850	47439	218410	705350	2199800
191	Skav228790	Skav228790	Skav228790 [mRNA] locus=scaffold589:715744:719207:- [translate_table: standard]	1		18.7906		0.952118	n.d.	0.0412395		?variant?	1	1	0	1	2.4	65.786	0.011429	5.7862		By MS/MS	1432400	0	1432400	57294	0	57294	0	453460
192	Skav228874	Skav228874	Skav228874 [mRNA] locus=scaffold2395:54418:94387:+ [translate_table: standard]	1		18.0115		0.912643	n.d.	0.024032		?variant?	1	1	0	1	2.2	113.15	0.010753	5.7817		By MS/MS	834700	0	834700	17035	0	17035	0	264250
193	Skav229112	Skav229112	Skav229112 [mRNA] locus=scaffold92:705128:709339:+ [translate_table: standard]	1		19.0025		0.962855	n.d.	0.0477639		?variant?	1	1	1	1	1.6	155.37	0.021053	5.8609	By matching	By MS/MS	1895500	236530	1659000	24941	3112.3	21828	0	525200
194	Skav229263	Skav229263	Skav229263 [mRNA] locus=scaffold952:116088:128236:- [translate_table: standard]	1	22.9822	23.4566	1.15143	1.18854	0.744024	1.04695	1.03223		1	1	1	1	4.3	25.982	0	54.769	By MS/MS	By MS/MS	57835000	9685000	48150000	5257700	880450	4377300	8285900	11512000
195	Skav229309	Skav229309	Skav229309 [mRNA] locus=scaffold2942:312182:317175:- [translate_table: standard]	1		17.7059		0.897156	n.d.	0.0194439		?variant?	1	1	0	1	0.9	83.395	0.016	5.8093		By MS/MS	675330	0	675330	17772	0	17772	0	213800
196	Skav229865	Skav229865	Skav229865 [mRNA] locus=scaffold247:29370:48452:+ [translate_table: standard]	1		19.6305		0.994676	n.d.	0.0738157		?variant?	1	1	0	1	3.2	77.444	0.015038	5.8044		By MS/MS	1853500	0	1853500	51486	0	51486	0	811660
197	Skav230157	Skav230157	Skav230157 [mRNA] locus=scaffold1301:605695:622414:- [translate_table: standard]	1	19.5562	18.9612	0.979785	0.960762	0.0692213	0.0464161	0.980585		1	1	1	1	3.4	46.017	0.021505	5.862	By MS/MS	By matching	2358000	1192500	1165500	98249	49687	48562	770890	510380
198	Skav230245	Skav230245	Skav230245 [mRNA] locus=scaffold1818:150086:157664:- [translate_table: standard]	1	18.8937	20.0475	0.946596	1.01581	0.0437341	0.0985562	1.07312		1	1	1	1	5	34.217	0.013158	5.7917	By matching	By MS/MS	3228200	753420	2474700	248320	57955	190360	487050	1083700
199	Skav230662	Skav230662	Skav230662 [mRNA] locus=scaffold2185:79393:85398:+ [translate_table: standard]	1	18.4333		0.923527		0.0317844	n.d.		?variant?	1	1	1	0	0.8	179.53	0.02381	5.8835	By MS/MS		353970	353970	0	4068.7	4068.7	0	353970	0
200	Skav231035	Skav231035	Skav231035 [mRNA] locus=scaffold1869:271804:272739:- [translate_table: standard]	1	19.8293		0.993469		0.0836485	n.d.		?variant?	1	1	1	0	6.8	35.155	0.010101	5.778	By MS/MS		931560	931560	0	66540	66540	0	931560	0
201	Skav231195	Skav231195	Skav231195 [mRNA] locus=scaffold2432:28466:32405:+ [translate_table: standard]	1	18.4142	19.007	0.922573	0.963084	0.0313677	0.0479139	1.04391		1	1	1	1	2	75.038	0.011976	5.7871	By matching	By MS/MS	2013500	349330	1664200	71912	12476	59436	349330	526850
202	Skav231269	Skav231269	Skav231269 [mRNA] locus=scaffold2436:392186:393901:+ [translate_table: standard]	1		17.0398		0.863406	n.d.	0.0122538		?variant?	1	1	0	1	3.9	64.538	0.010929	5.7829		By MS/MS	425610	0	425610	22400	0	22400	0	134740
203	Skav231382	Skav231382	Skav231382 [mRNA] locus=scaffold1586:905940:907367:- [translate_table: standard]	1	19.5674	20.6769	0.980349	1.0477	0.0697627	0.152459	1.0687		1	1	1	1	3.2	54.396	0.020833	5.8578	By MS/MS	By matching	5030100	1201800	3828300	209590	50075	159510	776920	1676400
205	Skav232086	Skav232086	Skav232086 [mRNA] locus=scaffold2353:32814:35204:+ [translate_table: standard]	1		20.1088		1.01891	n.d.	0.102831		?variant?	1	1	1	1	5	35.322	0.016129	5.9708	By MS/MS	By matching	3596400	1014400	2582000	189280	53387	135900	0	1130700
206	Skav232746	Skav232746	Skav232746 [mRNA] locus=scaffold4478:65743:70038:+ [translate_table: standard]	1		19.8485		1.00572	n.d.	0.0858568		?variant?	1	1	1	1	8.2	20.926	0.028169	5.9058	By MS/MS	By matching	3937000	1781100	2155800	328080	148430	179650	0	944060
207	Skav232887	Skav232887	Skav232887 [mRNA] locus=scaffold5953:11724:16241:+ [translate_table: standard]	1	17.6872		0.886149		0.018951	n.d.		?variant?	1	1	1	0	1	167.32	0.010582	5.7808	By MS/MS		326470	326470	0	4295.6	4295.6	0	211050	0
208	Skav233097	Skav233097	Skav233097 [mRNA] locus=scaffold1342:80436:90385:+ [translate_table: standard]	1		18.3211		0.928328	n.d.	0.0297833		?variant?	1	1	1	1	4.9	33.262	0.010363	5.7796	By matching	By MS/MS	1386300	351880	1034400	81548	20699	60850	0	327490
209	Skav233185	Skav233185	Skav233185 [mRNA] locus=scaffold24:234748:235503:- [translate_table: standard]	1	18.1867		0.911173		0.0267909	n.d.		?variant?	1	1	1	0	9.2	29.601	0.015152	5.8047	By MS/MS		461530	461530	0	35502	35502	0	298360	0
210	Skav233297	Skav233297	Skav233297 [mRNA] locus=scaffold1501:81994:82590:- [translate_table: standard]	1	20.5797		1.03106		0.140716	n.d.		?variant?	1	1	1	1	9.8	17.686	0.018519	6.0338	By MS/MS	By MS/MS	1567100	1567100	0	120550	120550	0	1567100	0
211	Skav233537	Skav233537	Skav233537 [mRNA] locus=scaffold5919:72146:77359:- [translate_table: standard]	1					n.d.	n.d.		?variant?	1	1	1	0	0.6	199.1	0.025	5.8867	By MS/MS		0	0	0	0	0	0	0	0
212	Skav233608	Skav233608	Skav233608 [mRNA] locus=scaffold109:181264:184371:+ [translate_table: standard]	1	23.4539	23.3122	1.17506	1.18122	1.03173	0.947184	1.00524		1	1	1	1	11	15.434	0.016393	5.9714	By MS/MS	By MS/MS	49708000	13732000	35977000	8284700	2288600	5996200	11490000	10415000
213	Skav233619;Skav233613	Skav233619;Skav233613	Skav233619 [mRNA] locus=scaffold109:286998:287699:+ [translate_table: standard];Skav233613 [mRNA] locus=scaffold109:220195:220926:+ [translate_table: standard]	2	21.9713	23.8881	1.10079	1.21041	0.369206	1.41191	1.09958		1	1	1	1	6.9	23.537	0	6.3191	By MS/MS	By MS/MS	70649000	11969000	58680000	7064900	1196900	5868000	4111700	15525000
214	Skav233784	Skav233784	Skav233784 [mRNA] locus=scaffold780:250908:258735:- [translate_table: standard]	1					n.d.	n.d.		?variant?	1	1	1	0	1	125.98	0	6.5077	By MS/MS		0	0	0	0	0	0	0	0
215	Skav233991	Skav233991	Skav233991 [mRNA] locus=scaffold2413:5019:31952:+ [translate_table: standard]	1	24.5442	21.8387	1.22969	1.10656	2.19672	0.341086	0.899871		1	1	1	1	1.8	56.24	0.013072	5.7916	By MS/MS	By matching	46408000	37843000	8564400	1546900	1261400	285480	24464000	3750500
216	Skav234327	Skav234327	Skav234327 [mRNA] locus=scaffold3161:121646:122173:+ [translate_table: standard]	1		17.4096		0.88214	n.d.	0.0158334		?variant?	1	1	0	1	6.9	19.379	0.0096618	5.7738		By MS/MS	549930	0	549930	49994	0	49994	0	174100
217	Skav234719	Skav234719	Skav234719 [mRNA] locus=scaffold634:296928:300053:- [translate_table: standard]	1	20.1641	20.9629	1.01024	1.06219	0.105499	0.185881	1.05142		1	1	1	1	1.2	117.36	0.019608	5.8364	By matching	By MS/MS	7064000	1531700	5532300	147170	31911	115260	1174900	2043900
218	Skav235201	Skav235201	Skav235201 [mRNA] locus=scaffold5443:14187:16396:- [translate_table: standard]	1	21.0833	21.1368	1.0563	1.071	0.199504	0.209699	1.01392		1	1	1	1	7.4	16.852	0	6.9503	By matching	By MS/MS	8702300	3436900	5265400	870230	343690	526540	2221800	2305800
219	Skav235258	Skav235258	Skav235258 [mRNA] locus=scaffold874:84623:86157:+ [translate_table: standard]	1	20.2579	18.4443	1.01494	0.934571	0.112584	0.0324389	0.920812		1	1	1	1	8.2	16.976	0.025316	5.8904	By MS/MS	By MS/MS	3066200	1939500	1126700	383270	242440	140840	1253800	356690
220	Skav235367	Skav235367	Skav235367 [mRNA] locus=scaffold3967:94005:101822:+ [translate_table: standard]	1	20.1249	20.3343	1.00828	1.03034	0.10267	0.120228	1.02188		1	1	1	1	3.7	41.783	0.015873	5.9672	By MS/MS	By MS/MS	4787700	1768800	3018900	208160	76904	131260	1143400	1322000
221	Skav235599	Skav235599	Skav235599 [mRNA] locus=scaffold3336:38806:50212:+ [translate_table: standard]	1	19.4626	19.9432	0.975099	1.01052	0.0648752	0.0916808	1.03633		1	1	1	1	3.5	43.163	0.025974	5.8937	By matching	By MS/MS	3906900	722490	3184500	186050	34404	151640	722490	1008100
222	Skav236304	Skav236304	Skav236304 [mRNA] locus=scaffold679:80321:92328:+ [translate_table: standard]	1		18.3462		0.929598	n.d.	0.0303053		?variant?	1	1	0	1	4	46.484	0.009901	5.7761		By MS/MS	1052600	0	1052600	55400	0	55400	0	333230
223	Skav236838	Skav236838	Skav236838 [mRNA] locus=scaffold1027:112086:122184:+ [translate_table: standard]	1		18.1988		0.922133	n.d.	0.0273633		?variant?	1	1	0	1	1.4	132.63	0	7.5411		By MS/MS	950400	0	950400	18635	0	18635	0	300880

## Sheet: P. bahamense
			Minimal variation factor	50	%
					Sample 5	Sample 6			Sample 5	Sample 6
				Median	21.1396	20.6212		Sum of LFQ intensities	3026018292	2803778420
id	Protein IDs	Majority protein IDs	protein names	Number of proteins	LFQ Sample 5 (log2(x))	LFQ Sample 6 (log2(x))	LFQ Sample 5 normalized	LFQ Sample 6 normalized	Abundance in Sample 5 [%]	Abundance in Sample 6 [%]	variation factor [LFQ Sample 6]/[LFQ Sample5]	possible variation between Samples	Peptides	Unique peptides	Unique peptides Sample5	Unique peptides Sample6	Sequence coverage [%]	Mol. weight [kDa]	Q-value	Score	Identification type Sample5	Identification type Sample6	Intensity	Intensity Sample5	Intensity Sample6	iBAQ	iBAQ Sample5	iBAQ Sample6	LFQ intensity Sample5	LFQ intensity Sample6
57	gnl|unk|contig00497_2;gnl|unk|contig15625_1	gnl|unk|contig00497_2	gnl|unk|contig00497_2 length=1358 numreads=1665 gene=isogroup00497 status=isotig	2	24.251	25.7065	1.14718	1.24661	0.659778	1.95294	1.08667		14	14	12	13	47.9	47.645	0	252.87	By MS/MS	By MS/MS	203760000	31512000	172250000	8150500	1260500	6890100	19965000	54756000
10	gnl|unk|contig00022_3;gnl|unk|contig09969_4	gnl|unk|contig00022_3	gnl|unk|contig00022_3 length=2367 numreads=92 gene=isogroup00022 status=isotig	2	27.0093	27.2087	1.27766	1.31945	4.46428	5.53218	1.03271		17	12	8	12	34.2	85.029	0	49.972	By MS/MS	By MS/MS	803780000	272830000	530950000	23641000	8024400	15616000	135090000	155110000
41	gnl|unk|contig00255_3;gnl|unk|contig08082_2;gnl|unk|contig03630_6;gnl|unk|contig02887_5;gnl|unk|contig01945_5;gnl|unk|contig00950_3;gnl|unk|contig14265_5;gnl|unk|contig01732_6;gnl|unk|contig01016_5;gnl|unk|contig13997_4;gnl|unk|contig13602_5;gnl|unk|contig12078_5;gnl|unk|contig11894_4;gnl|unk|contig05359_4;gnl|unk|contig11026_5;gnl|unk|contig05654_1;gnl|unk|contig04435_2;gnl|unk|contig00620_5;gnl…	gnl|unk|contig00255_3;gnl|unk|contig08082_2;gnl|unk|contig03630_6;gnl|unk|contig02887_5;gnl|unk|contig01945_5;gnl|unk|contig00950_3;gnl|unk|contig14265_5;gnl|unk|contig01732_6;gnl|unk|contig01016_5	gnl|unk|contig00255_3 length=1548 numreads=100 gene=isogroup00255 status=isotig;gnl|unk|contig08082_2 length=673 numreads=18 gene=isogroup08082 status=isotig;gnl|unk|contig03630_6 length=870 numreads=16 gene=isogroup03630 status=isotig;gnl|unk|contig	27	22.6807	26.321	1.0729	1.27641	0.222183	2.99	1.18968		12	12	6	12	25.6	56.057	0	40.409	By MS/MS	By MS/MS	258470000	11372000	247100000	9941100	437370	9503700	6723300	83833000
54	gnl|unk|contig00455_1;gnl|unk|contig07607_2;gnl|unk|contig09423_1	gnl|unk|contig00455_1	gnl|unk|contig00455_1 length=1387 numreads=30 gene=isogroup00455 status=isotig	3	26.6939	27.064	1.26274	1.31244	3.58755	5.00432	1.03936		11	10	9	10	25.7	49.671	0	52.163	By MS/MS	By MS/MS	584810000	143400000	441400000	38987000	9560200	29427000	108560000	140310000
51	gnl|unk|contig00400_4	gnl|unk|contig00400_4	gnl|unk|contig00400_4 length=1426 numreads=266 gene=isogroup00400 status=isotig	1	24.8943	25.1083	1.17761	1.2176	1.03053	1.29004	1.03395		8	8	7	8	19.6	52.693	0	62.746	By MS/MS	By MS/MS	161070000	39030000	122040000	9475000	2295900	7179100	31184000	36170000
214	gnl|unk|contig06470_2	gnl|unk|contig06470_2	gnl|unk|contig06470_2 length=729 numreads=12 gene=isogroup06470 status=isotig	1	25.6753	23.8563	1.21456	1.15688	1.77078	0.541662	0.952515		8	8	7	7	42	27.001	0	125.14	By MS/MS	By MS/MS	145480000	76487000	68995000	12123000	6373900	5749600	53584000	15187000
17	gnl|unk|contig00091_1	gnl|unk|contig00091_1	gnl|unk|contig00091_1 length=1875 numreads=342 gene=isogroup00091 status=isotig	1	24.0566	24.9005	1.13799	1.20752	0.576632	1.11703	1.0611		7	7	5	7	11.8	69.102	0	25.034	By MS/MS	By MS/MS	120320000	21417000	98900000	6332500	1127200	5205300	17449000	31319000
44	gnl|unk|contig00304_2	gnl|unk|contig00304_2	gnl|unk|contig00304_2 length=1505 numreads=411 gene=isogroup00304 status=isotig	1	24.1559	23.1605	1.14268	1.12314	0.617709	0.334402	0.982899		6	6	5	6	14.5	54.47	0	11.219	By MS/MS	By MS/MS	55291000	20542000	34750000	2513200	933700	1579500	18692000	9375900
48	gnl|unk|contig00375_5;gnl|unk|contig12782_2;gnl|unk|contig14453_6;gnl|unk|contig15591_2;gnl|unk|contig15591_3;gnl|unk|contig13775_5;gnl|unk|contig05413_2	gnl|unk|contig00375_5	gnl|unk|contig00375_5 length=1445 numreads=3584 gene=isogroup00375 status=isotig	7	26.7708	25.156	1.26638	1.21991	3.78385	1.33338	0.963305		16	6	6	6	39.6	53.485	0	117.31	By MS/MS	By MS/MS	292840000	166710000	126130000	11263000	6411800	4851300	114500000	37385000
95	gnl|unk|contig01593_6	gnl|unk|contig01593_6	gnl|unk|contig01593_6 length=1066 numreads=1685 gene=isogroup01593 status=isotig	1	24.6517	23.835	1.16614	1.15585	0.871046	0.533708	0.991177		6	6	6	5	25.6	39.573	0	21.915	By MS/MS	By MS/MS	86117000	52338000	33779000	4100800	2492300	1608500	26358000	14964000
144	gnl|unk|contig02916_6	gnl|unk|contig02916_6	gnl|unk|contig02916_6 length=920 numreads=16 gene=isogroup02916 status=isotig	1	24.969	24.5155	1.18114	1.18885	1.08525	0.855381	1.00652		9	6	6	6	38.1	33.512	0	53.001	By MS/MS	By MS/MS	134800000	61297000	73506000	8986900	4086500	4900400	32840000	23983000
150	gnl|unk|contig03086_3;gnl|unk|contig05411_4	gnl|unk|contig03086_3	gnl|unk|contig03086_3 length=908 numreads=16 gene=isogroup03086 status=isotig	2	23.9932	25.1162	1.13498	1.21798	0.551814	1.29718	1.07313		7	6	4	5	33.4	32.373	0	156.62	By MS/MS	By MS/MS	156810000	34411000	122400000	15681000	3441100	12240000	16698000	36370000
208	gnl|unk|contig05953_1	gnl|unk|contig05953_1	gnl|unk|contig05953_1 length=750 numreads=12 gene=isogroup05953 status=isotig	1	20.4193	21.1409	0.965922	1.0252	0.0463381	0.0824709	1.06137		6	6	4	4	36	27.377	0	32.244	By MS/MS	By MS/MS	8003900	1615100	6388800	533590	107670	425920	1402200	2312300
35	gnl|unk|contig00218_1	gnl|unk|contig00218_1	gnl|unk|contig00218_1 length=1593 numreads=28 gene=isogroup00218 status=isotig	1	22.7329	22.682	1.07537	1.09993	0.230356	0.239998	1.02285		5	5	5	5	10.5	57.515	0	27.661	By MS/MS	By MS/MS	29809000	8787500	21021000	931520	274610	656910	6970600	6729000
46	gnl|unk|contig09387_2;gnl|unk|contig00313_2;gnl|unk|contig03075_6	gnl|unk|contig09387_2;gnl|unk|contig00313_2	gnl|unk|contig09387_2 length=629 numreads=8 gene=isogroup09387 status=isotig;gnl|unk|contig00313_2 length=1491 numreads=28 gene=isogroup00313 status=isotig	3	22.2726	23.2815	1.05359	1.12901	0.167431	0.363652	1.07158		5	5	5	5	24.8	23.862	0	9.1217	By MS/MS	By MS/MS	36054000	6617200	29437000	3004500	551440	2453100	5066500	10196000
85	gnl|unk|contig01348_6	gnl|unk|contig01348_6	gnl|unk|contig01348_6 length=1104 numreads=232 gene=isogroup01348 status=isotig	1	24.776	25.0741	1.17201	1.21594	0.949366	1.25987	1.03748		5	5	5	5	19.6	41.314	0	25.797	By MS/MS	By MS/MS	154780000	36857000	117930000	15478000	3685700	11793000	28728000	35324000
100	gnl|unk|contig01686_4	gnl|unk|contig01686_4	gnl|unk|contig01686_4 length=1051 numreads=6 gene=isogroup01686 status=isotig	1	19.8353	20.758	0.938301	1.00663	0.0309146	0.0632468	1.07283		5	5	2	4	18.9	39.27	0	6.5988	By MS/MS	By MS/MS	7197400	826180	6371300	399860	45899	353960	935480	1773300
169	gnl|unk|contig04076_1	gnl|unk|contig04076_1	gnl|unk|contig04076_1 length=837 numreads=12 gene=isogroup04076 status=isotig	1	26.1926	26.1197	1.23903	1.26664	2.53445	2.60063	1.02229		6	5	4	5	39.8	30.415	0	51.365	By MS/MS	By MS/MS	361090000	112260000	248840000	30091000	9354600	20737000	76693000	72916000
204	gnl|unk|contig05841_2	gnl|unk|contig05841_2	gnl|unk|contig05841_2 length=751 numreads=14 gene=isogroup05841 status=isotig	1	25.987	26.2328	1.2293	1.27213	2.19777	2.81256	1.03484		7	5	5	5	36.8	26.812	0	65.681	By MS/MS	By MS/MS	383920000	99559000	284360000	34902000	9050800	25851000	66505000	78858000
222	gnl|unk|contig06855_2;gnl|unk|contig01985_2;gnl|unk|contig01081_3	gnl|unk|contig06855_2;gnl|unk|contig01985_2;gnl|unk|contig01081_3	gnl|unk|contig06855_2 length=715 numreads=6 gene=isogroup06855 status=isotig;gnl|unk|contig01985_2 length=1016 numreads=8 gene=isogroup01985 status=isotig;gnl|unk|contig01081_3 length=1154 numreads=12 gene=isogroup01081 status=isotig	3	25.8129	25.8248	1.22106	1.25234	1.94794	2.11978	1.02561		9	5	5	4	41.6	25.723	0	57.418	By MS/MS	By MS/MS	273280000	89707000	183580000	22774000	7475600	15298000	58945000	59434000
278	gnl|unk|contig10013_2;gnl|unk|contig10052_5;gnl|unk|contig04422_5	gnl|unk|contig10013_2;gnl|unk|contig10052_5	gnl|unk|contig10013_2 length=607 numreads=14 gene=isogroup10013 status=isotig;gnl|unk|contig10052_5 length=607 numreads=10 gene=isogroup10052 status=isotig	3	26.8407	26.5489	1.26969	1.28746	3.97189	3.50167	1.014		5	5	4	5	25.7	21.734	0	44.14	By MS/MS	By MS/MS	754620000	305110000	449500000	107800000	43588000	64215000	120190000	98179000
301	gnl|unk|contig11077_1	gnl|unk|contig11077_1	gnl|unk|contig11077_1 length=571 numreads=10 gene=isogroup11077 status=isotig	1	22.4038	22.9197	1.0598	1.11146	0.183383	0.282986	1.04874		5	5	5	4	40.8	21.01	0	9.6994	By MS/MS	By MS/MS	30515000	6921800	23593000	2542900	576820	1966100	5549200	7934300
50	gnl|unk|contig00390_3;gnl|unk|contig01933_1;gnl|unk|contig01647_1;gnl|unk|contig13995_1;gnl|unk|contig13039_3;gnl|unk|contig12415_5;gnl|unk|contig08699_3;gnl|unk|contig08473_6;gnl|unk|contig04696_5;gnl|unk|contig01383_6;gnl|unk|contig15493_3;gnl|unk|contig14397_6;gnl|unk|contig10487_6;gnl|unk|contig05079_4	gnl|unk|contig00390_3;gnl|unk|contig01933_1;gnl|unk|contig01647_1;gnl|unk|contig13995_1;gnl|unk|contig13039_3;gnl|unk|contig12415_5;gnl|unk|contig08699_3;gnl|unk|contig08473_6;gnl|unk|contig04696_5;gnl|unk|contig01383_6	gnl|unk|contig00390_3 length=1432 numreads=148 gene=isogroup00390 status=isotig;gnl|unk|contig01933_1 length=1022 numreads=102 gene=isogroup01933 status=isotig;gnl|unk|contig01647_1 length=1058 numreads=146 gene=isogroup01647 status=isotig;gnl|unk|co	14		21.4325		1.03934	n.d.	0.100946		?variant?	4	4	1	4	10.7	50.303	0	4.3323	By matching	By MS/MS	9051000	429830	8621100	452550	21491	431060	0	2830300
62	gnl|unk|contig00661_2	gnl|unk|contig00661_2	gnl|unk|contig00661_2 length=1279 numreads=8 gene=isogroup00661 status=isotig	1	21.986	20.7642	1.04004	1.00693	0.137269	0.0635179	0.968171		4	4	2	4	16.2	45.873	0	15.556	By MS/MS	By MS/MS	13159000	2568500	10591000	692590	135180	557410	4153800	1780900
64	gnl|unk|contig00717_3;gnl|unk|contig13644_5	gnl|unk|contig00717_3	gnl|unk|contig00717_3 length=1259 numreads=20 gene=isogroup00717 status=isotig	2	22.2832	22.1989	1.05409	1.07651	0.16867	0.171704	1.02126		4	4	4	4	15.3	45.005	0	60.5	By MS/MS	By MS/MS	24070000	10593000	13478000	1146200	504420	641790	5104000	4814200
87	gnl|unk|contig01495_1;gnl|unk|contig11460_4;gnl|unk|contig08985_1;gnl|unk|contig05501_4	gnl|unk|contig01495_1;gnl|unk|contig11460_4;gnl|unk|contig08985_1;gnl|unk|contig05501_4	gnl|unk|contig01495_1 length=1080 numreads=115 gene=isogroup01495 status=isotig;gnl|unk|contig11460_4 length=560 numreads=10 gene=isogroup11460 status=isotig;gnl|unk|contig08985_1 length=641 numreads=32 gene=isogroup08985 status=isotig;gnl|unk|contig	4	25.0688	26.4292	1.18587	1.28165	1.16301	3.22287	1.08077		4	4	3	4	17.5	37.867	0	19.075	By MS/MS	By MS/MS	468090000	86441000	381650000	42554000	7858300	34695000	35193000	90362000
106	gnl|unk|contig01764_2	gnl|unk|contig01764_2	gnl|unk|contig01764_2 length=1039 numreads=10 gene=isogroup01764 status=isotig	1	20.3469	20.6329	0.962499	1.00057	0.0440711	0.0579932	1.03955		4	4	2	4	17.1	37.49	0	2.3872	By MS/MS	By MS/MS	7428600	909520	6519100	495240	60635	434600	1333600	1626000
130	gnl|unk|contig02480_6;gnl|unk|contig08913_2	gnl|unk|contig02480_6;gnl|unk|contig08913_2	gnl|unk|contig02480_6 length=960 numreads=10 gene=isogroup02480 status=isotig;gnl|unk|contig08913_2 length=643 numreads=6 gene=isogroup08913 status=isotig	2	22.4161	22.757	1.06038	1.10357	0.184946	0.252809	1.04073		5	4	2	4	26.9	34.613	0	15.922	By MS/MS	By MS/MS	36325000	4701600	31624000	3027100	391800	2635300	5596500	7088200
165	gnl|unk|contig03921_1;gnl|unk|contig09969_6	gnl|unk|contig03921_1	gnl|unk|contig03921_1 length=850 numreads=12 gene=isogroup03921 status=isotig	2	27.8013	27.9347	1.31512	1.35466	7.7293	9.15051	1.03006		9	4	4	3	35.2	29.805	0	82.263	By MS/MS	By MS/MS	1391400000	534090000	857290000	99384000	38149000	61235000	233890000	256560000
170	gnl|unk|contig04085_2;gnl|unk|contig07123_4;gnl|unk|contig09812_6	gnl|unk|contig04085_2;gnl|unk|contig07123_4;gnl|unk|contig09812_6	gnl|unk|contig04085_2 length=842 numreads=11 gene=isogroup04085 status=isotig;gnl|unk|contig07123_4 length=707 numreads=6 gene=isogroup07123 status=isotig;gnl|unk|contig09812_6 length=616 numreads=8 gene=isogroup09812 status=isotig	3	21.683	21.7276	1.0257	1.05365	0.111265	0.123854	1.02725		4	4	4	4	18.9	31.615	0	97.255	By MS/MS	By MS/MS	14215000	5181000	9034000	888440	323810	564630	3366900	3472600
293	gnl|unk|contig10755_2	gnl|unk|contig10755_2	gnl|unk|contig10755_2 length=584 numreads=6 gene=isogroup10755 status=isotig	1	24.4218	24.5935	1.15526	1.19263	0.742692	0.902889	1.03235		6	4	4	4	44.1	21.405	0	6.4779	By MS/MS	By MS/MS	106560000	31925000	74636000	11840000	3547300	8292900	22474000	25315000
342	gnl|unk|contig13085_5;gnl|unk|contig15547_1;gnl|unk|contig12025_3	gnl|unk|contig13085_5;gnl|unk|contig15547_1	gnl|unk|contig13085_5 length=509 numreads=6 gene=isogroup13085 status=isotig;gnl|unk|contig15547_1 length=310 numreads=6 gene=isogroup15547 status=isotig	3	22.4453	20.6297	1.06176	1.00041	0.188723	0.0578648	0.942219		4	4	4	3	42.9	18.799	0	32.293	By MS/MS	By MS/MS	16656000	9603700	7052500	2379500	1372000	1007500	5710800	1622400
9	gnl|unk|contig00021_1;gnl|unk|contig07803_4;gnl|unk|contig00906_3	gnl|unk|contig00021_1;gnl|unk|contig07803_4;gnl|unk|contig00906_3	gnl|unk|contig00021_1 length=2375 numreads=1190 gene=isogroup00021 status=isotig;gnl|unk|contig07803_4 length=684 numreads=12 gene=isogroup07803 status=isotig;gnl|unk|contig00906_3 length=1201 numreads=12 gene=isogroup00906 status=isotig	3	21.1117	22.0687	0.998676	1.07019	0.0748806	0.156888	1.07161		3	3	3	3	5.1	89.9	0	13.684	By MS/MS	By MS/MS	15968000	2785800	13182000	469640	81937	387710	2265900	4398800
15	gnl|unk|contig08005_2;gnl|unk|contig03607_3;gnl|unk|contig02167_4;gnl|unk|contig00551_5;gnl|unk|contig00082_5	gnl|unk|contig08005_2;gnl|unk|contig03607_3;gnl|unk|contig02167_4;gnl|unk|contig00551_5;gnl|unk|contig00082_5	gnl|unk|contig08005_2 length=673 numreads=6 gene=isogroup08005 status=isotig;gnl|unk|contig03607_3 length=868 numreads=18 gene=isogroup03607 status=isotig;gnl|unk|contig02167_4 length=996 numreads=14 gene=isogroup02167 status=isotig;gnl|unk|contig005	5	20.6817	21.7486	0.978339	1.05467	0.0555846	0.125673	1.07802		3	3	2	3	18.3	24.878	0	6.8122	By MS/MS	By MS/MS	12938000	2171500	10767000	1176200	197410	978810	1682000	3523600
18	gnl|unk|contig00092_6	gnl|unk|contig00092_6	gnl|unk|contig00092_6 length=1875 numreads=89 gene=isogroup00092 status=isotig	1	22.9443	23.449	1.08537	1.13713	0.266717	0.408413	1.04769		4	3	1	3	8	69.328	0	6.5487	By MS/MS	By MS/MS	46127000	8907900	37219000	1774100	342610	1431500	8070900	11451000
19	gnl|unk|contig00101_6	gnl|unk|contig00101_6	gnl|unk|contig00101_6 length=1858 numreads=22 gene=isogroup00101 status=isotig	1	20.1512	18.7197	0.95324	0.907791	0.0384796	0.0153978	0.952322		3	3	3	1	7.8	66.808	0	77.546	By MS/MS	By MS/MS	2132900	1344700	788130	106640	67237	39407	1164400	431720
28	gnl|unk|contig00153_1	gnl|unk|contig00153_1	gnl|unk|contig00153_1 length=1705 numreads=20 gene=isogroup00153 status=isotig	1	20.0704	20.2044	0.949419	0.979789	0.0363844	0.0430919	1.03199		3	3	3	3	10.5	60.95	0	6.595	By MS/MS	By MS/MS	4885200	1450300	3434900	203550	60430	143120	1101000	1208200
30	gnl|unk|contig07438_5;gnl|unk|contig06486_5;gnl|unk|contig00893_1;gnl|unk|contig00176_5;gnl|unk|contig12290_1;gnl|unk|contig08184_1;gnl|unk|contig00548_3;gnl|unk|contig13199_2;gnl|unk|contig10972_4;gnl|unk|contig07212_1;gnl|unk|contig01101_2;gnl|unk|contig01021_6;gnl|unk|contig00496_1	gnl|unk|contig07438_5;gnl|unk|contig06486_5;gnl|unk|contig00893_1;gnl|unk|contig00176_5;gnl|unk|contig12290_1;gnl|unk|contig08184_1;gnl|unk|contig00548_3	gnl|unk|contig07438_5 length=695 numreads=12 gene=isogroup07438 status=isotig;gnl|unk|contig06486_5 length=729 numreads=24 gene=isogroup06486 status=isotig;gnl|unk|contig00893_1 length=1203 numreads=56 gene=isogroup00893 status=isotig;gnl|unk|contig0	13	20.0854	19.7438	0.950128	0.957451	0.0367645	0.0313135	1.00771		3	3	2	2	16.4	25.099	0	2.513	By MS/MS	By MS/MS	4319000	1661900	2657100	392640	151080	241560	1112500	877960
55	gnl|unk|contig00456_1	gnl|unk|contig00456_1	gnl|unk|contig00456_1 length=1387 numreads=32 gene=isogroup00456 status=isotig	1	21.7058	23.0741	1.02678	1.11895	0.113036	0.314961	1.08977		5	3	3	3	13.2	52.017	0	16.488	By MS/MS	By MS/MS	37503000	4234700	33268000	1704700	192490	1512200	3420500	8830800
96	gnl|unk|contig05067_6;gnl|unk|contig01632_5	gnl|unk|contig05067_6;gnl|unk|contig01632_5	gnl|unk|contig05067_6 length=786 numreads=6 gene=isogroup05067 status=isotig;gnl|unk|contig01632_5 length=1058 numreads=8 gene=isogroup01632 status=isotig	2	17.7691	21.9511	0.84056	1.06449	0.00738198	0.144605	1.26641		3	3	1	3	14.9	29.305	0	2.904	By MS/MS	By MS/MS	11173000	303280	10869000	744850	20219	724630	223380	4054400
117	gnl|unk|contig02043_5;gnl|unk|contig02084_6;gnl|unk|contig02476_4;gnl|unk|contig15490_3;gnl|unk|contig15228_2;gnl|unk|contig10428_4;gnl|unk|contig15185_1;gnl|unk|contig11033_1;gnl|unk|contig09979_2	gnl|unk|contig02043_5;gnl|unk|contig02084_6;gnl|unk|contig02476_4	gnl|unk|contig02043_5 length=1007 numreads=18 gene=isogroup02043 status=isotig;gnl|unk|contig02084_6 length=1005 numreads=44 gene=isogroup02084 status=isotig;gnl|unk|contig02476_4 length=958 numreads=20 gene=isogroup02476 status=isotig	9	22.0303	20.9488	1.04213	1.01589	0.141546	0.0721883	0.974817		6	3	3	2	29.5	36.451	0	307.56	By MS/MS	By MS/MS	11691000	6067800	5622900	730670	379240	351430	4283200	2024000
119	gnl|unk|contig05595_2;gnl|unk|contig02118_3;gnl|unk|contig10099_1;gnl|unk|contig08480_6	gnl|unk|contig05595_2;gnl|unk|contig02118_3;gnl|unk|contig10099_1	gnl|unk|contig05595_2 length=765 numreads=6 gene=isogroup05595 status=isotig;gnl|unk|contig02118_3 length=1002 numreads=20 gene=isogroup02118 status=isotig;gnl|unk|contig10099_1 length=606 numreads=8 gene=isogroup10099 status=isotig	4	21.1423	20.8222	1.00012	1.00975	0.0764866	0.0661251	1.00962		3	3	3	3	13.3	27.74	0	2.7492	By MS/MS	By MS/MS	9001600	2161400	6840200	642970	154380	488590	2314500	1854000
122	gnl|unk|contig02146_5	gnl|unk|contig02146_5	gnl|unk|contig02146_5 length=998 numreads=8 gene=isogroup02146 status=isotig	1	20.8011	19.9157	0.983986	0.965786	0.0603797	0.0352753	0.981504		3	3	3	1	16.8	36.774	0	2.9428	By MS/MS	By MS/MS	4578200	2160700	2417500	352170	166210	185960	1827100	989040
125	gnl|unk|contig02348_6	gnl|unk|contig02348_6	gnl|unk|contig02348_6 length=970 numreads=22 gene=isogroup02348 status=isotig	1	18.9953	19.5058	0.898561	0.94591	0.0172692	0.0265513	1.05269		3	3	3	2	12.4	35.644	0	3.8845	By MS/MS	By MS/MS	2693800	598820	2095000	141780	31517	110260	522570	744440
140	gnl|unk|contig02844_2;gnl|unk|contig00034_2	gnl|unk|contig02844_2	gnl|unk|contig02844_2 length=927 numreads=12 gene=isogroup02844 status=isotig	2	18.4279	20.049	0.871721	0.972252	0.0116539	0.0386906	1.11532		3	3	3	2	13.9	33.66	0	24.002	By MS/MS	By MS/MS	2875600	672660	2203000	169150	39569	129590	352650	1084800
149	gnl|unk|contig03033_2	gnl|unk|contig03033_2	gnl|unk|contig03033_2 length=912 numreads=6 gene=isogroup03033 status=isotig	1	19.1734	20.286	0.906988	0.983746	0.0195389	0.0455992	1.08463		3	3	3	3	18.4	32.896	0	8.3219	By MS/MS	By MS/MS	4355200	764310	3590900	256190	44959	211230	591250	1278500
152	gnl|unk|contig03163_1;gnl|unk|contig14868_1;gnl|unk|contig14298_4;gnl|unk|contig09779_1;gnl|unk|contig05315_2;gnl|unk|contig04037_6;gnl|unk|contig01667_3;gnl|unk|contig01078_5;gnl|unk|contig00392_5;gnl|unk|contig10645_2	gnl|unk|contig03163_1;gnl|unk|contig14868_1;gnl|unk|contig14298_4;gnl|unk|contig09779_1;gnl|unk|contig05315_2;gnl|unk|contig04037_6;gnl|unk|contig01667_3;gnl|unk|contig01078_5;gnl|unk|contig00392_5	gnl|unk|contig03163_1 length=903 numreads=10 gene=isogroup03163 status=isotig;gnl|unk|contig14868_1 length=444 numreads=6 gene=isogroup14868 status=isotig;gnl|unk|contig14298_4 length=477 numreads=2 gene=isogroup14298 status=isotig;gnl|unk|contig0977	10	19.4861	20.7974	0.92178	1.00854	0.0242679	0.064998	1.09413		3	3	1	3	14	33.036	0	3.0417	By MS/MS	By MS/MS	7085200	280870	6804300	545010	21605	523410	734350	1822400
195	gnl|unk|contig05489_5	gnl|unk|contig05489_5	gnl|unk|contig05489_5 length=766 numreads=8 gene=isogroup05489 status=isotig	1	24.0614	24.4625	1.13821	1.18628	0.578549	0.82453	1.04223		5	3	3	3	26.2	27.489	0	25.89	By MS/MS	By MS/MS	102720000	27462000	75257000	11413000	3051300	8361900	17507000	23118000
232	gnl|unk|contig07261_1	gnl|unk|contig07261_1	gnl|unk|contig07261_1 length=702 numreads=10 gene=isogroup07261 status=isotig	1	22.3667	23.7903	1.05805	1.15368	0.178723	0.517445	1.09039		5	3	3	3	24.8	24.883	0	5.903	By MS/MS	By MS/MS	47915000	10991000	36924000	4355900	999140	3356800	5408200	14508000
251	gnl|unk|contig08577_2	gnl|unk|contig08577_2	gnl|unk|contig08577_2 length=657 numreads=62 gene=isogroup08577 status=isotig	1	28.1599	26.9629	1.33209	1.30753	9.91071	4.66549	0.981565		4	3	3	1	50.7	23.449	0	32.392	By MS/MS	By MS/MS	776630000	453450000	323180000	70602000	41222000	29380000	299900000	130810000
267	gnl|unk|contig09915_3;gnl|unk|contig09487_6	gnl|unk|contig09915_3;gnl|unk|contig09487_6	gnl|unk|contig09915_3 length=612 numreads=20 gene=isogroup09915 status=isotig;gnl|unk|contig09487_6 length=626 numreads=20 gene=isogroup09487 status=isotig	2	22.2354	20.429	1.05183	0.99068	0.163175	0.0503499	0.941859		3	3	3	3	21.6	21.529	0	9.0748	By MS/MS	By matching	11263000	6952900	4310400	1407900	869110	538810	4937700	1411700
287	gnl|unk|contig10493_3	gnl|unk|contig10493_3	gnl|unk|contig10493_3 length=592 numreads=6 gene=isogroup10493 status=isotig	1	21.4011	21.3212	1.01237	1.03395	0.0915196	0.0934525	1.02131		3	3	3	2	18.8	22.204	0	5.3542	By MS/MS	By MS/MS	10727000	3889100	6838100	825170	299160	526010	2769400	2620200
312	gnl|unk|contig11661_6	gnl|unk|contig11661_6	gnl|unk|contig11661_6 length=553 numreads=14 gene=isogroup11661 status=isotig	1	21.7449	23.435	1.02863	1.13645	0.116146	0.40449	1.10482		3	3	3	3	20.1	19.88	0	6.5617	By MS/MS	By MS/MS	38855000	4535900	34319000	3532200	412350	3119900	3514600	11341000
326	gnl|unk|contig12287_4	gnl|unk|contig12287_4	gnl|unk|contig12287_4 length=531 numreads=6 gene=isogroup12287 status=isotig	1	21.5623	22.7289	1.02	1.10221	0.102339	0.247937	1.0806		5	3	2	2	34.5	19.141	0	3.5523	By MS/MS	By MS/MS	25915000	3583900	22332000	2879500	398210	2481300	3096800	6951600
336	gnl|unk|contig12753_2	gnl|unk|contig12753_2	gnl|unk|contig12753_2 length=518 numreads=12 gene=isogroup12753 status=isotig	1	25.0552	23.2909	1.18522	1.12947	1.15207	0.366042	0.952958		3	3	3	3	30.1	18.001	0	68.655	By MS/MS	By MS/MS	77844000	48614000	29230000	9730500	6076700	3653700	34862000	10263000
345	gnl|unk|contig13218_3	gnl|unk|contig13218_3	gnl|unk|contig13218_3 length=505 numreads=6 gene=isogroup13218 status=isotig	1	25.4197	25.1727	1.20247	1.22072	1.48327	1.34897	1.01518		3	3	3	3	15.5	18.037	0	30.396	By MS/MS	By MS/MS	305940000	93509000	212430000	43706000	13358000	30348000	44884000	37822000
358	gnl|unk|contig14274_6;gnl|unk|contig13958_3;gnl|unk|contig12634_1;gnl|unk|contig10988_2	gnl|unk|contig14274_6;gnl|unk|contig13958_3;gnl|unk|contig12634_1;gnl|unk|contig10988_2	gnl|unk|contig14274_6 length=477 numreads=8 gene=isogroup14274 status=isotig;gnl|unk|contig13958_3 length=486 numreads=6 gene=isogroup13958 status=isotig;gnl|unk|contig12634_1 length=515 numreads=6 gene=isogroup12634 status=isotig;gnl|unk|contig10988	4	22.8318	22.3906	1.08005	1.08581	0.246717	0.19611	1.00533		3	3	3	3	13.8	17.55	0	9.7261	By MS/MS	By MS/MS	27377000	11517000	15859000	4562800	1919600	2643200	7465700	5498500
11	gnl|unk|contig00025_6	gnl|unk|contig00025_6	gnl|unk|contig00025_6 length=2310 numreads=150 gene=isogroup00025 status=isotig	1	21.6403	20.4705	1.02368	0.992692	0.10802	0.0518194	0.969727		2	2	2	1	4.4	85.275	0	20.611	By MS/MS	By MS/MS	9677400	6502300	3175100	744420	500180	244240	3268700	1452900
12	gnl|unk|contig00037_5	gnl|unk|contig00037_5	gnl|unk|contig00037_5 length=2192 numreads=58 gene=isogroup00037 status=isotig	1	19.9987	19.0864	0.946026	0.925572	0.0346198	0.0198536	0.978379		2	2	2	1	4.8	78.103	0	6.2554	By MS/MS	By MS/MS	2951400	1628600	1322800	68637	37874	30763	1047600	556650
16	gnl|unk|contig00088_1;gnl|unk|contig01313_5	gnl|unk|contig00088_1;gnl|unk|contig01313_5	gnl|unk|contig00088_1 length=1889 numreads=84 gene=isogroup00088 status=isotig;gnl|unk|contig01313_5 length=1115 numreads=26 gene=isogroup01313 status=isotig	2		19.8511		0.962656	n.d.	0.0337316		?variant?	2	2	0	2	2.9	67.374	0.0053191	1.5005		By MS/MS	2655800	0	2655800	126470	0	126470	0	945760
21	gnl|unk|contig00106_5	gnl|unk|contig00106_5	gnl|unk|contig00106_5 length=1828 numreads=40 gene=isogroup00106 status=isotig	1	21.0636	20.5809	0.996403	0.998044	0.0724285	0.0559388	1.00165		3	2	1	2	7.4	66.086	0	5.4688	By MS/MS	By MS/MS	7698300	3070900	4627400	197390	78741	118650	2191700	1568400
22	gnl|unk|contig00112_4;gnl|unk|contig11474_4	gnl|unk|contig00112_4;gnl|unk|contig11474_4	gnl|unk|contig00112_4 length=1815 numreads=120 gene=isogroup00112 status=isotig;gnl|unk|contig11474_4 length=560 numreads=10 gene=isogroup11474 status=isotig	2	22.3582	22.8766	1.05764	1.10937	0.177676	0.274658	1.04891		6	2	1	2	13.4	64.958	0	11.472	By MS/MS	By MS/MS	32006000	6017300	25989000	914470	171920	742540	5376500	7700800
23	gnl|unk|contig00129_1	gnl|unk|contig00129_1	gnl|unk|contig00129_1 length=1775 numreads=20 gene=isogroup00129 status=isotig	1	19.5015	19.4345	0.922508	0.942453	0.0245279	0.0252713	1.02162		2	2	2	2	5.2	67.03	0	3.5555	By MS/MS	By MS/MS	2989700	730090	2259600	90597	22124	68473	742220	708550
29	gnl|unk|contig00153_2	gnl|unk|contig00153_2	gnl|unk|contig00153_2 length=1705 numreads=20 gene=isogroup00153 status=isotig	1	19.2016	19.3155	0.908322	0.936681	0.0199245	0.02327	1.03122		2	2	2	2	4.8	60.746	0	3.0603	By MS/MS	By MS/MS	2467500	687720	1779800	74772	20840	53932	602920	652440
31	gnl|unk|contig00183_3;gnl|unk|contig00179_4;gnl|unk|contig14519_4;gnl|unk|contig13824_6;gnl|unk|contig07540_6;gnl|unk|contig05885_3;gnl|unk|contig05089_2;gnl|unk|contig02558_6;gnl|unk|contig02245_1;gnl|unk|contig13222_2;gnl|unk|contig05557_3;gnl|unk|contig02242_2;gnl|unk|contig02108_5	gnl|unk|contig00183_3;gnl|unk|contig00179_4;gnl|unk|contig14519_4	gnl|unk|contig00183_3 length=1648 numreads=122 gene=isogroup00183 status=isotig;gnl|unk|contig00179_4 length=1655 numreads=36 gene=isogroup00179 status=isotig;gnl|unk|contig14519_4 length=469 numreads=6 gene=isogroup14519 status=isotig	13	21.1396	22.8	1	1.10566	0.0763479	0.260456	1.10566		6	2	1	2	16.2	57.958	0	7.2841	By MS/MS	By MS/MS	24134000	3778100	20356000	893850	139930	753920	2310300	7302600
33	gnl|unk|contig00212_3	gnl|unk|contig00212_3	gnl|unk|contig00212_3 length=1599 numreads=16 gene=isogroup00212 status=isotig	1	19.6507	17.5668	0.929568	0.851881	0.0272014	0.00692458	0.916427		2	2	2	1	3.9	55.673	0	2.1711	By MS/MS	By matching	1699000	1260900	438080	77228	57315	19913	823120	194150
39	gnl|unk|contig00523_2;gnl|unk|contig00240_5;gnl|unk|contig15423_2;gnl|unk|contig15151_2;gnl|unk|contig14612_2;gnl|unk|contig13631_4;gnl|unk|contig13358_2;gnl|unk|contig13117_2;gnl|unk|contig12439_3;gnl|unk|contig12401_3;gnl|unk|contig12197_6;gnl|unk|contig11436_5;gnl|unk|contig10441_6;gnl|unk|contig09789_2;gnl|unk|contig09137_4;gnl|unk|contig07864_4;gnl|unk|contig07702_6;gnl|unk|contig07389_3;gnl…	gnl|unk|contig00523_2;gnl|unk|contig00240_5;gnl|unk|contig15423_2;gnl|unk|contig15151_2;gnl|unk|contig14612_2;gnl|unk|contig13631_4;gnl|unk|contig13358_2;gnl|unk|contig13117_2;gnl|unk|contig12439_3;gnl|unk|contig12401_3;gnl|unk|contig12197_6;gnl|unk|contig11436_5;gnl|unk|contig10441_6;gnl|unk|contig09789_2;gnl|unk|contig09137_4;gnl|unk|contig07864_4;gnl|unk|contig07702_6;gnl|unk|contig07389_3;gnl…	gnl|unk|contig00523_2 length=1344 numreads=81 gene=isogroup00523 status=isotig;gnl|unk|contig00240_5 length=1566 numreads=20 gene=isogroup00240 status=isotig;gnl|unk|contig15423_2 length=354 numreads=4 gene=isogroup15423 status=isotig;gnl|unk|contig1	26	19.7573	20.4064	0.934611	0.989586	0.0292873	0.0495688	1.05882		2	2	1	2	6.9	48.213	0	5.004	By MS/MS	By MS/MS	5654200	871310	4782900	257010	39605	217400	886240	1389800
47	gnl|unk|contig11724_2;gnl|unk|contig00339_6;gnl|unk|contig03846_4	gnl|unk|contig11724_2;gnl|unk|contig00339_6;gnl|unk|contig03846_4	gnl|unk|contig11724_2 length=551 numreads=6 gene=isogroup11724 status=isotig;gnl|unk|contig00339_6 length=1472 numreads=28 gene=isogroup00339 status=isotig;gnl|unk|contig03846_4 length=854 numreads=16 gene=isogroup03846 status=isotig	3	17.3567	19.753	0.821051	0.957898	0.00554656	0.0315139	1.16667		2	2	1	2	14.7	19.371	0	2.081	By matching	By MS/MS	2686700	208790	2477900	383810	29828	353990	167840	883580
69	gnl|unk|contig00819_5	gnl|unk|contig00819_5	gnl|unk|contig00819_5 length=1226 numreads=28 gene=isogroup00819 status=isotig	1	16.923	19.2485	0.800534	0.933432	0.00410639	0.022214	1.16601		2	2	1	2	6.4	43.526	0.0051813	1.436	By matching	By MS/MS	2156000	87286	2068700	113470	4594	108880	124260	622830
80	gnl|unk|contig01168_5	gnl|unk|contig01168_5	gnl|unk|contig01168_5 length=1137 numreads=12 gene=isogroup01168 status=isotig	1	17.7988	18.6947	0.841963	0.906575	0.00753531	0.0151324	1.07674		2	2	1	2	7.7	40.954	0.0049261	1.2318	By matching	By MS/MS	1784000	122340	1661600	84951	5825.6	79125	228020	424280
89	gnl|unk|contig01506_2	gnl|unk|contig01506_2	gnl|unk|contig01506_2 length=1080 numreads=16 gene=isogroup01506 status=isotig	1	25.9404	26.4878	1.2271	1.28449	2.12794	3.3564	1.04677		10	2	1	2	33.9	39.51	0	36.898	By MS/MS	By MS/MS	421060000	75053000	346010000	28071000	5003500	23067000	64392000	94106000
92	gnl|unk|contig01535_4;gnl|unk|contig05489_4	gnl|unk|contig01535_4	gnl|unk|contig01535_4 length=1077 numreads=14 gene=isogroup01535 status=isotig	2	23.9386	24.0813	1.1324	1.16779	0.531325	0.633074	1.03125		7	2	2	2	25.9	39.136	0	8.4375	By MS/MS	By MS/MS	83205000	26007000	57198000	5943200	1857600	4085600	16078000	17750000
94	gnl|unk|contig01584_6;gnl|unk|contig01460_2	gnl|unk|contig01584_6;gnl|unk|contig01460_2	gnl|unk|contig01584_6 length=1068 numreads=70 gene=isogroup01584 status=isotig;gnl|unk|contig01460_2 length=1088 numreads=508 gene=isogroup01460 status=isotig	2	18.6825	21.8492	0.883768	1.05955	0.0139037	0.134743	1.1989		2	2	2	2	12.4	36.664	0	7.1228	By MS/MS	By MS/MS	11321000	431160	10890000	1617300	61595	1555700	420730	3777900
102	gnl|unk|contig01719_6	gnl|unk|contig01719_6	gnl|unk|contig01719_6 length=1047 numreads=8 gene=isogroup01719 status=isotig	1	18.4982	19.4997	0.875047	0.945616	0.0122359	0.02644	1.08065		2	2	2	1	7.2	38.478	0	3.4786	By MS/MS	By MS/MS	2472300	693230	1779100	137350	38513	98840	370260	741320
109	gnl|unk|contig01812_4	gnl|unk|contig01812_4	gnl|unk|contig01812_4 length=1038 numreads=8 gene=isogroup01812 status=isotig	1	20.1843	19.1611	0.95481	0.929193	0.0393752	0.0209082	0.973171		2	2	2	2	7.8	37.564	0	3.8955	By MS/MS	By MS/MS	3303700	1640400	1663300	206480	102520	103960	1191500	586220
113	gnl|unk|contig12863_6;gnl|unk|contig01914_4	gnl|unk|contig12863_6;gnl|unk|contig01914_4	gnl|unk|contig12863_6 length=515 numreads=6 gene=isogroup12863 status=isotig;gnl|unk|contig01914_4 length=1019 numreads=12 gene=isogroup01914 status=isotig	2	21.9925	23.7674	1.04035	1.15257	0.137894	0.509277	1.10787		2	2	2	1	22.7	18.523	0	2.5004	By MS/MS	By MS/MS	70950000	12270000	58680000	14190000	2454000	11736000	4172700	14279000
115	gnl|unk|contig01995_4	gnl|unk|contig01995_4	gnl|unk|contig01995_4 length=1009 numreads=10 gene=isogroup01995 status=isotig	1		17.4812		0.847728	n.d.	0.00652548		?variant?	2	2	2	1	6	36.532	0	1.7936	By MS/MS	By MS/MS	731860	158220	573640	52275	11301	40974	0	182960
141	gnl|unk|contig02852_4	gnl|unk|contig02852_4	gnl|unk|contig02852_4 length=926 numreads=20 gene=isogroup02852 status=isotig	1	20.3072	20.7829	0.960621	1.00784	0.0428748	0.0643489	1.04916		2	2	2	2	10.4	34.857	0	35.408	By MS/MS	By MS/MS	7485300	1573700	5911600	415850	87426	328420	1297400	1804200
142	gnl|unk|contig02867_3	gnl|unk|contig02867_3	gnl|unk|contig02867_3 length=919 numreads=12 gene=isogroup02867 status=isotig	1	22.2759	21.5755	1.05375	1.04628	0.167818	0.111464	0.99291		3	2	2	2	12.1	32.738	0	47.534	By MS/MS	By MS/MS	16411000	6797800	9613600	1172200	485550	686680	5078200	3125200
143	gnl|unk|contig02912_4	gnl|unk|contig02912_4	gnl|unk|contig02912_4 length=924 numreads=18 gene=isogroup02912 status=isotig	1	26.7199	26.5886	1.26397	1.28938	3.65265	3.59943	1.02011		7	2	2	2	20.8	34.05	0	14.652	By MS/MS	By MS/MS	639620000	166760000	472870000	49202000	12828000	36374000	110530000	100920000
153	gnl|unk|contig03180_2;gnl|unk|contig14245_4;gnl|unk|contig14033_6;gnl|unk|contig13393_5;gnl|unk|contig12756_4;gnl|unk|contig05252_4;gnl|unk|contig03231_3;gnl|unk|contig02425_1;gnl|unk|contig01472_1	gnl|unk|contig03180_2;gnl|unk|contig14245_4;gnl|unk|contig14033_6;gnl|unk|contig13393_5;gnl|unk|contig12756_4;gnl|unk|contig05252_4;gnl|unk|contig03231_3;gnl|unk|contig02425_1;gnl|unk|contig01472_1	gnl|unk|contig03180_2 length=900 numreads=16 gene=isogroup03180 status=isotig;gnl|unk|contig14245_4 length=477 numreads=6 gene=isogroup14245 status=isotig;gnl|unk|contig14033_6 length=484 numreads=17 gene=isogroup14033 status=isotig;gnl|unk|contig133	9	18.9952	20.9632	0.89856	1.01659	0.0172689	0.0729159	1.13135		2	2	2	2	8	31.798	0	3.2242	By matching	By MS/MS	6195100	653270	5541800	387190	40829	346370	522560	2044400
154	gnl|unk|contig03205_3;gnl|unk|contig05837_1	gnl|unk|contig03205_3	gnl|unk|contig03205_3 length=898 numreads=6 gene=isogroup03205 status=isotig	2	23.7438	22.4379	1.12319	1.0881	0.464207	0.202652	0.968763		3	2	2	2	10.4	32.321	0	64.936	By MS/MS	By MS/MS	39593000	16543000	23050000	3045600	1272500	1773100	14047000	5681900
156	gnl|unk|contig03380_4	gnl|unk|contig03380_4	gnl|unk|contig03380_4 length=885 numreads=24 gene=isogroup03380 status=isotig	1	17.1312		0.810382		0.00474386	n.d.		?variant?	2	2	1	1	7.8	30.592	0	17.005	By MS/MS	By MS/MS	625030	143550	481490	69448	15950	53498	143550	0
161	gnl|unk|contig03656_2	gnl|unk|contig03656_2	gnl|unk|contig03656_2 length=864 numreads=11 gene=isogroup03656 status=isotig	1	21.4747	21.2669	1.01585	1.03131	0.0963081	0.0899964	1.01522		2	2	2	1	8	31.087	0	5.4605	By MS/MS	By MS/MS	10698000	4249500	6448900	972590	386320	586260	2914300	2523300
162	gnl|unk|contig03739_3	gnl|unk|contig03739_3	gnl|unk|contig03739_3 length=864 numreads=153 gene=isogroup03739 status=isotig	1	19.9462	19.5175	0.943545	0.946475	0.0333838	0.0267667	1.00311		2	2	2	2	8.7	31.597	0	3.3274	By MS/MS	By matching	3508700	1588400	1920300	350870	158840	192030	1010200	750480
163	gnl|unk|contig13913_4;gnl|unk|contig03759_5	gnl|unk|contig13913_4;gnl|unk|contig03759_5	gnl|unk|contig13913_4 length=482 numreads=6 gene=isogroup13913 status=isotig;gnl|unk|contig03759_5 length=862 numreads=17 gene=isogroup03759 status=isotig	2	19.1501	18.4831	0.905887	0.896313	0.0192263	0.0130681	0.989432		2	2	2	2	11.9	18.74	0	6.1783	By MS/MS	By MS/MS	1808100	596650	1211400	200890	66295	134600	581790	366400
166	gnl|unk|contig03973_6;gnl|unk|contig11549_4	gnl|unk|contig03973_6;gnl|unk|contig11549_4	gnl|unk|contig03973_6 length=846 numreads=16 gene=isogroup03973 status=isotig;gnl|unk|contig11549_4 length=557 numreads=8 gene=isogroup11549 status=isotig	2	20.1392	20.6883	0.952675	1.00326	0.0381624	0.0602651	1.05309		2	2	2	1	13.8	29.491	0	3.3718	By MS/MS	By MS/MS	7644500	1630600	6013900	764450	163060	601390	1154800	1689700
172	gnl|unk|contig11489_2;gnl|unk|contig04542_4;gnl|unk|contig13543_1	gnl|unk|contig11489_2;gnl|unk|contig04542_4;gnl|unk|contig13543_1	gnl|unk|contig11489_2 length=559 numreads=6 gene=isogroup11489 status=isotig;gnl|unk|contig04542_4 length=817 numreads=8 gene=isogroup04542 status=isotig;gnl|unk|contig13543_1 length=499 numreads=14 gene=isogroup13543 status=isotig	3	25.3136	21.7939	1.19745	1.05687	1.37808	0.129679	0.882602		2	2	2	2	8.6	20.88	0	2.9081	By MS/MS	By matching	74169000	54859000	19310000	14834000	10972000	3862000	41701000	3635900
175	gnl|unk|contig04694_5	gnl|unk|contig04694_5	gnl|unk|contig04694_5 length=807 numreads=6 gene=isogroup04694 status=isotig	1	24.5565	24.0299	1.16163	1.1653	0.815428	0.61089	1.00315		5	2	1	2	22.7	28.853	0	75.144	By MS/MS	By MS/MS	130760000	48275000	82480000	10058000	3713500	6344600	24675000	17128000
185	gnl|unk|contig05317_6;gnl|unk|contig00846_5	gnl|unk|contig05317_6;gnl|unk|contig00846_5	gnl|unk|contig05317_6 length=777 numreads=14 gene=isogroup05317 status=isotig;gnl|unk|contig00846_5 length=1220 numreads=26 gene=isogroup00846 status=isotig	2	20.4732	20.0121	0.968473	0.970462	0.0481028	0.0377134	1.00205		2	2	2	2	11.6	28.475	0	38.298	By MS/MS	By MS/MS	5047800	2066400	2981400	420650	172200	248450	1455600	1057400
188	gnl|unk|contig05352_1	gnl|unk|contig05352_1	gnl|unk|contig05352_1 length=772 numreads=12 gene=isogroup05352 status=isotig	1	24.5832	23.2063	1.1629	1.12536	0.830629	0.345181	0.967723		2	2	2	2	9.7	27.614	0	3.2188	By MS/MS	By MS/MS	67690000	37037000	30652000	9670000	5291100	4378900	25135000	9678100
192	gnl|unk|contig05444_2;gnl|unk|contig09771_3	gnl|unk|contig05444_2;gnl|unk|contig09771_3	gnl|unk|contig05444_2 length=771 numreads=10 gene=isogroup05444 status=isotig;gnl|unk|contig09771_3 length=617 numreads=8 gene=isogroup09771 status=isotig	2	23.3838	22.2848	1.10616	1.08067	0.361696	0.182243	0.976963		2	2	2	2	10.5	27.807	0	3.2281	By MS/MS	By matching	27754000	10576000	17177000	1460700	556660	904070	10945000	5109700
196	gnl|unk|contig05518_4;gnl|unk|contig13894_4	gnl|unk|contig05518_4	gnl|unk|contig05518_4 length=764 numreads=8 gene=isogroup05518 status=isotig	2	19.8213	19.6494	0.937637	0.952876	0.0306155	0.0293311	1.01625		3	2	2	2	14.6	28.59	0	5.5303	By MS/MS	By MS/MS	3833700	1051200	2782500	239600	65701	173900	926430	822380
215	gnl|unk|contig06515_5	gnl|unk|contig06515_5	gnl|unk|contig06515_5 length=728 numreads=4 gene=isogroup06515 status=isotig	1	17.3106	19.018	0.818869	0.922256	0.00537208	0.0189344	1.12626		2	2	2	1	9.1	25.733	0.0048077	1.1987	By MS/MS	By MS/MS	1325900	397240	928680	132590	39724	92868	162560	530880
227	gnl|unk|contig07068_4	gnl|unk|contig07068_4	gnl|unk|contig07068_4 length=708 numreads=8 gene=isogroup07068 status=isotig	1		19.7482		0.957666	n.d.	0.0314098		?variant?	2	2	0	2	17.8	24.539	0	1.685		By MS/MS	2254700	0	2254700	118670	0	118670	0	880660
239	gnl|unk|contig07626_4;gnl|unk|contig10596_4;gnl|unk|contig08389_4;gnl|unk|contig07171_4	gnl|unk|contig07626_4;gnl|unk|contig10596_4;gnl|unk|contig08389_4;gnl|unk|contig07171_4	gnl|unk|contig07626_4 length=688 numreads=8 gene=isogroup07626 status=isotig;gnl|unk|contig10596_4 length=588 numreads=6 gene=isogroup10596 status=isotig;gnl|unk|contig08389_4 length=662 numreads=8 gene=isogroup08389 status=isotig;gnl|unk|contig07171	4	21.3659	19.9366	1.0107	0.966802	0.0893121	0.035791	0.956563		2	2	2	2	12.2	25.297	0	27.387	By MS/MS	By MS/MS	7236200	4874800	2361400	603020	406230	196790	2702600	1003500
240	gnl|unk|contig07719_5;gnl|unk|contig12002_3	gnl|unk|contig07719_5;gnl|unk|contig12002_3	gnl|unk|contig07719_5 length=687 numreads=8 gene=isogroup07719 status=isotig;gnl|unk|contig12002_3 length=542 numreads=6 gene=isogroup12002 status=isotig	2	20.4816	20.7685	0.968871	1.00715	0.0483837	0.0637105	1.0395		2	2	2	2	10.9	23.732	0	3.4325	By MS/MS	By MS/MS	7065100	2011400	5053600	1009300	287350	721950	1464100	1786300
241	gnl|unk|contig10711_3;gnl|unk|contig07752_3;gnl|unk|contig06462_3	gnl|unk|contig10711_3;gnl|unk|contig07752_3;gnl|unk|contig06462_3	gnl|unk|contig10711_3 length=584 numreads=18 gene=isogroup10711 status=isotig;gnl|unk|contig07752_3 length=683 numreads=14 gene=isogroup07752 status=isotig;gnl|unk|contig06462_3 length=727 numreads=8 gene=isogroup06462 status=isotig	3	22.3068	23.1524	1.05521	1.12275	0.171456	0.33253	1.064		2	2	2	2	12.9	20.244	0	32.092	By MS/MS	By MS/MS	33996000	8001100	25995000	5666000	1333500	4332500	5188300	9323400
243	gnl|unk|contig07872_3;gnl|unk|contig08913_1	gnl|unk|contig07872_3	gnl|unk|contig07872_3 length=681 numreads=8 gene=isogroup07872 status=isotig	2	23.7037	22.9278	1.12129	1.11186	0.451484	0.284584	0.991586		4	2	2	2	35.7	24.624	0	7.9714	By MS/MS	By MS/MS	52679000	8397200	44282000	4390000	699770	3690200	13662000	7979100
248	gnl|unk|contig08209_2	gnl|unk|contig08209_2	gnl|unk|contig08209_2 length=669 numreads=6 gene=isogroup08209 status=isotig	1	21.95	20.3878	1.03833	0.988684	0.133882	0.048934	0.952186		3	2	1	2	24.7	24.19	0	12.906	By MS/MS	By MS/MS	11171000	3083000	8087500	930880	256920	673960	4051300	1372000
254	gnl|unk|contig08755_1	gnl|unk|contig08755_1	gnl|unk|contig08755_1 length=650 numreads=24 gene=isogroup08755 status=isotig	1	18.0472	19.2275	0.853715	0.932414	0.00895137	0.0218933	1.09218		2	2	2	2	9.7	23.846	0	2.0386	By matching	By MS/MS	2199100	269170	1929900	199920	24470	175450	270870	613840
298	gnl|unk|contig10949_3	gnl|unk|contig10949_3	gnl|unk|contig10949_3 length=577 numreads=10 gene=isogroup10949 status=isotig	1	20.7278	20.2094	0.980515	0.980032	0.0573856	0.0432416	0.999507		3	2	1	2	26	20.295	0	3.5855	By matching	By MS/MS	6384500	1005800	5378700	1276900	201150	1075700	1736500	1212400
313	gnl|unk|contig11669_5	gnl|unk|contig11669_5	gnl|unk|contig11669_5 length=554 numreads=96 gene=isogroup11669 status=isotig	1	22.5317	21.8433	1.06585	1.05926	0.200376	0.134194	0.993819		2	2	2	2	13	19.008	0	6.5648	By MS/MS	By MS/MS	20326000	6457300	13869000	3387600	1076200	2311400	6063400	3762500
320	gnl|unk|contig11906_4;gnl|unk|contig10802_4	gnl|unk|contig11906_4;gnl|unk|contig10802_4	gnl|unk|contig11906_4 length=538 numreads=6 gene=isogroup11906 status=isotig;gnl|unk|contig10802_4 length=583 numreads=12 gene=isogroup10802 status=isotig	2	20.3826	19.7772	0.964187	0.959073	0.0451749	0.0320478	0.994696		2	2	1	2	11.7	19.142	0	1.6495	By MS/MS	By MS/MS	4930000	1486400	3443600	616250	185800	430440	1367000	898550
330	gnl|unk|contig12462_5	gnl|unk|contig12462_5	gnl|unk|contig12462_5 length=526 numreads=8 gene=isogroup12462 status=isotig	1	21.3761	20.8779	1.01119	1.01245	0.0899466	0.0687287	1.00125		2	2	2	1	13.6	18.762	0	2.8752	By MS/MS	By MS/MS	9392000	3503700	5888300	1043600	389300	654250	2721800	1927000
353	gnl|unk|contig13791_6;gnl|unk|contig11009_5	gnl|unk|contig13791_6	gnl|unk|contig13791_6 length=489 numreads=8 gene=isogroup13791 status=isotig	2	24.2413	22.6909	1.14672	1.10037	0.65535	0.241496	0.95958		3	2	2	2	14.1	17.589	0	5.8279	By MS/MS	By MS/MS	51229000	34094000	17135000	7318500	4870600	2447900	19831000	6771000
356	gnl|unk|contig13977_2	gnl|unk|contig13977_2	gnl|unk|contig13977_2 length=485 numreads=6 gene=isogroup13977 status=isotig	1	21.5323	20.488	1.01857	0.993539	0.100231	0.0524506	0.975421		2	2	2	2	17.3	16.599	0	10.973	By MS/MS	By MS/MS	16120000	3715400	12404000	1612000	371540	1240400	3033000	1470600
371	gnl|unk|contig15315_4;gnl|unk|contig15197_2	gnl|unk|contig15315_4;gnl|unk|contig15197_2	gnl|unk|contig15315_4 length=386 numreads=24 gene=isogroup15315 status=isotig;gnl|unk|contig15197_2 length=411 numreads=6 gene=isogroup15197 status=isotig	2	21.207	21.4299	1.00319	1.03922	0.0799962	0.100764	1.03592		2	2	2	2	24.2	13.296	0	20.06	By MS/MS	By MS/MS	11148000	3990500	7157000	1592500	570070	1022400	2420700	2825200
6	gnl|unk|contig02432_1;gnl|unk|contig01278_1;gnl|unk|contig00163_3;gnl|unk|contig00002_4;gnl|unk|contig00001_1	gnl|unk|contig02432_1;gnl|unk|contig01278_1;gnl|unk|contig00163_3;gnl|unk|contig00002_4;gnl|unk|contig00001_1	gnl|unk|contig02432_1 length=965 numreads=28 gene=isogroup02432 status=isotig;gnl|unk|contig01278_1 length=1121 numreads=53 gene=isogroup01278 status=isotig;gnl|unk|contig00163_3 length=1682 numreads=95 gene=isogroup00163 status=isotig;gnl|unk|contig	5		18.1384		0.8796	n.d.	0.0102911		?variant?	1	1	0	1	3.7	35.654	0.0043478	1.0194		By MS/MS	904690	0	904690	45235	0	45235	0	288540
7	gnl|unk|contig00009_4	gnl|unk|contig00009_4	gnl|unk|contig00009_4 length=2698 numreads=172 gene=isogroup00009 status=isotig	1	19.4651	18.7807	0.920787	0.910747	0.0239172	0.0160623	0.989096		1	1	1	1	1.2	97.501	0.005	1.2935	By MS/MS	By matching	2135800	723740	1412000	48540	16449	32092	723740	450350
8	gnl|unk|contig00018_5	gnl|unk|contig00018_5	gnl|unk|contig00018_5 length=2407 numreads=68 gene=isogroup00018 status=isotig	1		16.7367		0.811628	n.d.	0.0038951		?variant?	1	1	0	1	1.4	89.023	0	2.5265		By MS/MS	342410	0	342410	8152.5	0	8152.5	0	109210
14	gnl|unk|contig00080_4	gnl|unk|contig00080_4	gnl|unk|contig00080_4 length=1904 numreads=62 gene=isogroup00080 status=isotig	1	20.0603	20.7046	0.94894	1.00405	0.03613	0.0609499	1.05807		1	1	1	1	4.3	67.238	0	2.4735	By MS/MS	By MS/MS	6478100	1437400	5040700	190530	42276	148260	1093300	1708900
24	gnl|unk|contig00134_4	gnl|unk|contig00134_4	gnl|unk|contig00134_4 length=1752 numreads=28 gene=isogroup00134 status=isotig	1	17.3584	16.9014	0.821128	0.819611	0.00555284	0.00436589	0.998152		1	1	1	1	1.9	63.126	0	2.5813	By MS/MS	By MS/MS	551810	168030	383780	20437	6223.2	14214	168030	122410
25	gnl|unk|contig00136_5	gnl|unk|contig00136_5	gnl|unk|contig00136_5 length=1741 numreads=24 gene=isogroup00136 status=isotig	1		17.3115		0.8395	n.d.	0.00580146		?variant?	1	1	0	1	1.9	65.026	0	1.6128		By MS/MS	510000	0	510000	15000	0	15000	0	162660
32	gnl|unk|contig00203_5;gnl|unk|contig00821_5	gnl|unk|contig00203_5;gnl|unk|contig00821_5	gnl|unk|contig00203_5 length=1613 numreads=34 gene=isogroup00203 status=isotig;gnl|unk|contig00821_5 length=1226 numreads=20 gene=isogroup00821 status=isotig	2	18.0406	20.4786	0.853402	0.993086	0.00891039	0.0521118	1.16368		5	1	1	1	11.9	58.275	0	1.7543	By matching	By MS/MS	4850800	269630	4581200	179660	9986.3	169670	269630	1461100
34	gnl|unk|contig00214_2	gnl|unk|contig00214_2	gnl|unk|contig00214_2 length=1599 numreads=15 gene=isogroup00214 status=isotig	1		18.0114		0.87344	n.d.	0.00942371		?variant?	1	1	0	1	2.8	57.68	0	3.074		By MS/MS	828440	0	828440	29587	0	29587	0	264220
37	gnl|unk|contig00249_1;gnl|unk|contig00228_3	gnl|unk|contig00249_1;gnl|unk|contig00228_3	gnl|unk|contig00249_1 length=1561 numreads=154 gene=isogroup00249 status=isotig;gnl|unk|contig00228_3 length=1578 numreads=292 gene=isogroup00228 status=isotig	2		20.2167		0.980383	n.d.	0.0434592		?variant?	1	1	0	1	1.5	57.592	0.0048544	1.2128		By MS/MS	3820500	0	3820500	119390	0	119390	0	1218500
42	gnl|unk|contig00265_2	gnl|unk|contig00265_2	gnl|unk|contig00265_2 length=1535 numreads=180 gene=isogroup00265 status=isotig	1	17.5856	18.4685	0.831876	0.895605	0.00649996	0.0129365	1.07661		1	1	1	1	3.1	54.56	0	3.8861	By matching	By MS/MS	1333900	196690	1137200	78466	11570	66896	196690	362710
45	gnl|unk|contig00305_6	gnl|unk|contig00305_6	gnl|unk|contig00305_6 length=1499 numreads=14 gene=isogroup00305 status=isotig	1	19.3255	18.7343	0.914183	0.908497	0.0217114	0.015554	0.99378		1	1	1	1	2.6	55.349	0	1.8447	By MS/MS	By MS/MS	2024300	656990	1367300	88014	28565	59450	656990	436100
52	gnl|unk|contig06856_4;gnl|unk|contig05259_5;gnl|unk|contig05172_4;gnl|unk|contig04860_3;gnl|unk|contig02202_5;gnl|unk|contig01586_1;gnl|unk|contig00411_5	gnl|unk|contig06856_4;gnl|unk|contig05259_5;gnl|unk|contig05172_4;gnl|unk|contig04860_3;gnl|unk|contig02202_5;gnl|unk|contig01586_1;gnl|unk|contig00411_5	gnl|unk|contig06856_4 length=716 numreads=4 gene=isogroup06856 status=isotig;gnl|unk|contig05259_5 length=779 numreads=22 gene=isogroup05259 status=isotig;gnl|unk|contig05172_4 length=783 numreads=18 gene=isogroup05172 status=isotig;gnl|unk|contig048	7		17.6278		0.854838	n.d.	0.00722347		?variant?	1	1	0	1	4.2	27.059	0	2.7373		By MS/MS	635010	0	635010	48847	0	48847	0	202530
60	gnl|unk|contig00638_4	gnl|unk|contig00638_4	gnl|unk|contig00638_4 length=1280 numreads=1703 gene=isogroup00638 status=isotig	1	22.5323	22.5493	1.06588	1.0935	0.200461	0.218915	1.02591		1	1	1	1	2.8	50.097	0	9.567	By MS/MS	By MS/MS	28217000	8072000	20145000	7054200	2018000	5036200	6066000	6137900
61	gnl|unk|contig00661_1	gnl|unk|contig00661_1	gnl|unk|contig00661_1 length=1279 numreads=8 gene=isogroup00661 status=isotig	1	19.9545	18.581	0.943936	0.901063	0.0335755	0.0139861	0.954581		1	1	1	1	3.3	44.843	0.0049751	1.243	By MS/MS	By MS/MS	2600900	1596900	1004000	216740	133080	83666	1016000	392140
63	gnl|unk|contig00716_3;gnl|unk|contig15235_5;gnl|unk|contig04789_6;gnl|unk|contig03494_5;gnl|unk|contig02967_4;gnl|unk|contig02464_5;gnl|unk|contig02193_4	gnl|unk|contig00716_3;gnl|unk|contig15235_5;gnl|unk|contig04789_6;gnl|unk|contig03494_5;gnl|unk|contig02967_4;gnl|unk|contig02464_5;gnl|unk|contig02193_4	gnl|unk|contig00716_3 length=1258 numreads=30 gene=isogroup00716 status=isotig;gnl|unk|contig15235_5 length=405 numreads=4 gene=isogroup15235 status=isotig;gnl|unk|contig04789_6 length=804 numreads=12 gene=isogroup04789 status=isotig;gnl|unk|contig03	7	21.3036	20.6513	1.00776	1.00146	0.0855381	0.0587386	0.993752		2	1	1	1	6.4	45.328	0	6.3463	By MS/MS	By MS/MS	8562800	3420400	5142400	285430	114010	171410	2588400	1646900
66	gnl|unk|contig00742_4	gnl|unk|contig00742_4	gnl|unk|contig00742_4 length=1252 numreads=16 gene=isogroup00742 status=isotig	1	20.5176	19.0702	0.970574	0.924786	0.0496064	0.0196317	0.952824		1	1	1	1	3.4	45.991	0	3.1906	By MS/MS	By matching	4113700	2539600	1574200	195890	120930	74960	1501100	550430
68	gnl|unk|contig00800_6	gnl|unk|contig00800_6	gnl|unk|contig00800_6 length=1230 numreads=24 gene=isogroup00800 status=isotig	1	21.8372	18.9905	1.033	0.920922	0.123816	0.0185767	0.891505		1	1	1	1	2	44.325	0	3.2323	By MS/MS	By MS/MS	6575300	5533800	1041500	597750	503080	94678	3746700	520850
70	gnl|unk|contig00835_2	gnl|unk|contig00835_2	gnl|unk|contig00835_2 length=1219 numreads=14 gene=isogroup00835 status=isotig	1	16.9305	18.3309	0.80089	0.888936	0.00412787	0.0117602	1.10994		1	1	1	1	2.5	44.771	0.004878	1.2184	By matching	By MS/MS	1158700	124910	1033800	39956	4307.1	35649	124910	329730
71	gnl|unk|contig00880_1	gnl|unk|contig00880_1	gnl|unk|contig00880_1 length=1207 numreads=12 gene=isogroup00880 status=isotig	1		17.3963		0.843613	n.d.	0.00615277		?variant?	1	1	0	1	4	43.686	0	3.2075		By MS/MS	540900	0	540900	30050	0	30050	0	172510
75	gnl|unk|contig01007_1	gnl|unk|contig01007_1	gnl|unk|contig01007_1 length=1173 numreads=44 gene=isogroup01007 status=isotig	1		17.9167		0.868849	n.d.	0.00882523		?variant?	1	1	0	1	4.1	42.227	0.004717	1.1738		By MS/MS	775820	0	775820	38791	0	38791	0	247440
81	gnl|unk|contig01190_6	gnl|unk|contig01190_6	gnl|unk|contig01190_6 length=1133 numreads=8 gene=isogroup01190 status=isotig	1	20.9496	19.0347	0.991011	0.923066	0.0669262	0.0191549	0.931438		1	1	1	1	4	40.997	0.0044248	1.0429	By MS/MS	By MS/MS	4199600	2624000	1575600	199980	124950	75027	2025200	537060
83	gnl|unk|contig01309_1	gnl|unk|contig01309_1	gnl|unk|contig01309_1 length=1111 numreads=8 gene=isogroup01309 status=isotig	1					n.d.	n.d.		?variant?	1	1	1	0	2.4	39.54	0.0048309	1.1991	By MS/MS		0	0	0	0	0	0	0	0
86	gnl|unk|contig07538_3;gnl|unk|contig01473_5	gnl|unk|contig07538_3;gnl|unk|contig01473_5	gnl|unk|contig07538_3 length=693 numreads=6 gene=isogroup07538 status=isotig;gnl|unk|contig01473_5 length=1085 numreads=10 gene=isogroup01473 status=isotig	2	19.0865	18.7248	0.902879	0.908038	0.0183971	0.0154524	1.00571		1	1	1	1	6.1	24.374	0	6.1955	By MS/MS	By MS/MS	1915100	556700	1358400	212790	61855	150930	556700	433250
88	gnl|unk|contig15007_4;gnl|unk|contig15014_4;gnl|unk|contig01504_5	gnl|unk|contig15007_4;gnl|unk|contig15014_4;gnl|unk|contig01504_5	gnl|unk|contig15007_4 length=434 numreads=4 gene=isogroup15007 status=isotig;gnl|unk|contig15014_4 length=436 numreads=10 gene=isogroup15014 status=isotig;gnl|unk|contig01504_5 length=1081 numreads=24 gene=isogroup01504 status=isotig	3	20.5901	20.8773	0.974005	1.01242	0.0521643	0.0686966	1.03944		1	1	1	1	10.4	15.264	0	1.6243	By MS/MS	By MS/MS	8812400	2183200	6629200	979150	242570	736580	1578500	1926100
90	gnl|unk|contig01517_5;gnl|unk|contig15420_6;gnl|unk|contig15243_5;gnl|unk|contig06247_4;gnl|unk|contig06220_4;gnl|unk|contig00203_4	gnl|unk|contig01517_5;gnl|unk|contig15420_6;gnl|unk|contig15243_5;gnl|unk|contig06247_4;gnl|unk|contig06220_4;gnl|unk|contig00203_4	gnl|unk|contig01517_5 length=1076 numreads=16 gene=isogroup01517 status=isotig;gnl|unk|contig15420_6 length=357 numreads=1 gene=isogroup15420 status=isotig;gnl|unk|contig15243_5 length=404 numreads=2 gene=isogroup15243 status=isotig;gnl|unk|contig062	6	16.9813	16.7039	0.803289	0.810034	0.00427559	0.00380736	1.0084		2	1	1	1	7.2	37.928	0.005291	1.5002	By MS/MS	By matching	464090	129380	334710	33149	9241.1	23908	129380	106750
91	gnl|unk|contig01521_1	gnl|unk|contig01521_1	gnl|unk|contig01521_1 length=1080 numreads=14 gene=isogroup01521 status=isotig	1	16.9683	17.1642	0.802675	0.832356	0.00423725	0.00523829	1.03698		1	1	1	1	3.1	39.55	0.0085837	0.97118	By matching	By MS/MS	588710	128220	460490	26759	5828.1	20931	128220	146870
99	gnl|unk|contig04086_6;gnl|unk|contig01685_1	gnl|unk|contig04086_6;gnl|unk|contig01685_1	gnl|unk|contig04086_6 length=842 numreads=10 gene=isogroup04086 status=isotig;gnl|unk|contig01685_1 length=1053 numreads=14 gene=isogroup01685 status=isotig	2					n.d.	n.d.		?variant?	1	1	0	1	3.6	29.325	0	2.3375		By MS/MS	0	0	0	0	0	0	0	0
101	gnl|unk|contig07481_4;gnl|unk|contig01705_4	gnl|unk|contig07481_4;gnl|unk|contig01705_4	gnl|unk|contig07481_4 length=694 numreads=4 gene=isogroup07481 status=isotig;gnl|unk|contig01705_4 length=1046 numreads=24 gene=isogroup01705 status=isotig	2	24.3913	24.0733	1.15382	1.16741	0.727193	0.629579	1.01178		4	1	1	1	21.6	26.023	0	5.6793	By MS/MS	By MS/MS	93717000	35495000	58222000	9371700	3549500	5822200	22005000	17652000
103	gnl|unk|contig01727_2;gnl|unk|contig13020_1;gnl|unk|contig12704_2;gnl|unk|contig08967_4;gnl|unk|contig04808_5;gnl|unk|contig14484_4;gnl|unk|contig10629_5	gnl|unk|contig01727_2;gnl|unk|contig13020_1;gnl|unk|contig12704_2;gnl|unk|contig08967_4;gnl|unk|contig04808_5	gnl|unk|contig01727_2 length=1046 numreads=14 gene=isogroup01727 status=isotig;gnl|unk|contig13020_1 length=512 numreads=8 gene=isogroup13020 status=isotig;gnl|unk|contig12704_2 length=518 numreads=6 gene=isogroup12704 status=isotig;gnl|unk|contig089	7	20.0551	21.1998	0.948696	1.02806	0.0360011	0.0859055	1.08365		3	1	1	1	14.6	39.032	0	4.0395	By MS/MS	By MS/MS	8164000	1410400	6753600	340170	58765	281400	1089400	2408600
104	gnl|unk|contig10537_3;gnl|unk|contig01730_3	gnl|unk|contig10537_3;gnl|unk|contig01730_3	gnl|unk|contig10537_3 length=591 numreads=6 gene=isogroup10537 status=isotig;gnl|unk|contig01730_3 length=1046 numreads=12 gene=isogroup01730 status=isotig	2	16.5541	18.5613	0.783083	0.900106	0.00317986	0.013796	1.14944		1	1	1	1	5.6	21.475	0.0043103	1.0056	By matching	By MS/MS	1141600	151240	990330	114160	15124	99033	96223	386810
105	gnl|unk|contig10104_6;gnl|unk|contig01757_6	gnl|unk|contig10104_6;gnl|unk|contig01757_6	gnl|unk|contig10104_6 length=604 numreads=8 gene=isogroup10104 status=isotig;gnl|unk|contig01757_6 length=1043 numreads=18 gene=isogroup01757 status=isotig	2	23.264	23.8648	1.10049	1.15729	0.33288	0.544836	1.05161		3	1	1	0	17.4	21.231	0	5.0819	By MS/MS	By MS/MS	51774000	19752000	32022000	4706700	1795600	2911100	10073000	15276000
107	gnl|unk|contig01779_4	gnl|unk|contig01779_4	gnl|unk|contig01779_4 length=1038 numreads=16 gene=isogroup01779 status=isotig	1	18.8477	20.6127	0.89158	0.999588	0.0155901	0.0571871	1.12114		1	1	1	1	4.3	38.411	0	1.591	By matching	By MS/MS	5425100	483090	4942000	417310	37161	380150	471760	1603400
108	gnl|unk|contig01801_4;gnl|unk|contig02617_6;gnl|unk|contig02596_4	gnl|unk|contig01801_4;gnl|unk|contig02617_6;gnl|unk|contig02596_4	gnl|unk|contig01801_4 length=1038 numreads=20 gene=isogroup01801 status=isotig;gnl|unk|contig02617_6 length=949 numreads=18 gene=isogroup02617 status=isotig;gnl|unk|contig02596_4 length=951 numreads=12 gene=isogroup02596 status=isotig	3	18.0603	17.5736	0.854332	0.852212	0.00903266	0.0069574	0.997518		2	1	1	1	6.9	38.026	0	2.2989	By MS/MS	By MS/MS	884950	273330	611630	44248	13666	30581	273330	195070
112	gnl|unk|contig01874_6	gnl|unk|contig01874_6	gnl|unk|contig01874_6 length=1030 numreads=14 gene=isogroup01874 status=isotig	1	21.6401	18.197	1.02367	0.882442	0.108007	0.0107177	0.862034		1	1	1	1	3.5	37.814	0.0047847	1.1981	By MS/MS	By matching	5423400	4727300	696050	417180	363640	53542	3268300	300500
114	gnl|unk|contig01984_4	gnl|unk|contig01984_4	gnl|unk|contig01984_4 length=1014 numreads=10 gene=isogroup01984 status=isotig	1	19.4262	20.2259	0.918946	0.980829	0.0232808	0.0437374	1.06734		1	1	1	1	4.4	36.854	0	3.2829	By MS/MS	By MS/MS	4424900	913100	3511800	442490	91310	351180	704480	1226300
121	gnl|unk|contig15640_1;gnl|unk|contig05073_5;gnl|unk|contig02140_5	gnl|unk|contig15640_1;gnl|unk|contig05073_5;gnl|unk|contig02140_5	gnl|unk|contig15640_1 length=264 numreads=2 gene=isogroup15640 status=isotig;gnl|unk|contig05073_5 length=788 numreads=8 gene=isogroup05073 status=isotig;gnl|unk|contig02140_5 length=998 numreads=14 gene=isogroup02140 status=isotig	3	18.0503	20.1176	0.853859	0.975577	0.0089702	0.0405738	1.14255		1	1	1	1	17	9.4147	0	24.19	By matching	By MS/MS	3677100	293000	3384100	612860	48834	564020	271440	1137600
123	gnl|unk|contig02218_2;gnl|unk|contig06277_1	gnl|unk|contig02218_2	gnl|unk|contig02218_2 length=988 numreads=40 gene=isogroup02218 status=isotig	2	21.4053	22.1842	1.01257	1.0758	0.091784	0.169971	1.06245		3	1	1	1	7.3	35.06	0	5.0815	By MS/MS	By MS/MS	18726000	2944600	15782000	814180	128030	686160	2777400	4765600
127	gnl|unk|contig14166_2;gnl|unk|contig12457_4;gnl|unk|contig02375_5	gnl|unk|contig14166_2;gnl|unk|contig12457_4;gnl|unk|contig02375_5	gnl|unk|contig14166_2 length=478 numreads=6 gene=isogroup14166 status=isotig;gnl|unk|contig12457_4 length=528 numreads=6 gene=isogroup12457 status=isotig;gnl|unk|contig02375_5 length=970 numreads=6 gene=isogroup02375 status=isotig	3	17.9728	19.9112	0.850194	0.96557	0.00850127	0.0351665	1.1357		1	1	1	1	11.9	17.424	0	4.8482	By matching	By MS/MS	3206600	288410	2918200	534440	48068	486370	257250	985990
131	gnl|unk|contig10436_4;gnl|unk|contig08766_6;gnl|unk|contig06887_5;gnl|unk|contig03680_4;gnl|unk|contig02542_6	gnl|unk|contig10436_4;gnl|unk|contig08766_6;gnl|unk|contig06887_5;gnl|unk|contig03680_4;gnl|unk|contig02542_6	gnl|unk|contig10436_4 length=595 numreads=16 gene=isogroup10436 status=isotig;gnl|unk|contig08766_6 length=650 numreads=12 gene=isogroup08766 status=isotig;gnl|unk|contig06887_5 length=715 numreads=6 gene=isogroup06887 status=isotig;gnl|unk|contig036	5		20.0757		0.973549	n.d.	0.0394147		?variant?	1	1	0	1	9.6	21.092	0.0051282	1.3767		By MS/MS	3147200	0	3147200	286110	0	286110	0	1105100
133	gnl|unk|contig02602_1	gnl|unk|contig02602_1	gnl|unk|contig02602_1 length=949 numreads=10 gene=isogroup02602 status=isotig	1	25.2917	24.8224	1.19641	1.20373	1.35736	1.05814	1.00612		5	1	1	1	19.6	33.536	0	35.735	By MS/MS	By MS/MS	145770000	66773000	79000000	10412000	4769500	5642800	41074000	29668000
135	gnl|unk|contig02628_5	gnl|unk|contig02628_5	gnl|unk|contig02628_5 length=948 numreads=260 gene=isogroup02628 status=isotig	1	21.201		1.0029		0.0796657	n.d.		?variant?	10	1	1	0	33.9	35.101	0	2.3701	By MS/MS	By matching	3789100	3789100	0	236820	236820	0	2410700	0
136	gnl|unk|contig02664_4	gnl|unk|contig02664_4	gnl|unk|contig02664_4 length=942 numreads=8 gene=isogroup02664 status=isotig	1	18.9204	20.5487	0.895019	0.996483	0.0163958	0.0547048	1.11337		1	1	1	1	4.5	33.001	0.0046296	1.1216	By MS/MS	By matching	5305000	496140	4808900	589450	55126	534320	496140	1533800
146	gnl|unk|contig02961_4	gnl|unk|contig02961_4	gnl|unk|contig02961_4 length=917 numreads=18 gene=isogroup02961 status=isotig	1	19.3211	16.726	0.913976	0.811107	0.0216456	0.00386621	0.887449		1	1	1	1	4.9	31.628	0.0047619	1.1809	By MS/MS	By matching	994860	655000	339870	62179	40937	21242	655000	108400
147	gnl|unk|contig02961_5	gnl|unk|contig02961_5	gnl|unk|contig02961_5 length=917 numreads=18 gene=isogroup02961 status=isotig	1	20.9394	18.4594	0.990528	0.895164	0.0664537	0.0128552	0.903724		1	1	1	1	6.5	33.216	0	106.38	By MS/MS	By matching	3676100	2668500	1007700	245080	177900	67177	2010900	360430
157	gnl|unk|contig14391_6;gnl|unk|contig12543_4;gnl|unk|contig06430_1;gnl|unk|contig03755_4;gnl|unk|contig03428_5	gnl|unk|contig14391_6;gnl|unk|contig12543_4;gnl|unk|contig06430_1;gnl|unk|contig03755_4;gnl|unk|contig03428_5	gnl|unk|contig14391_6 length=474 numreads=8 gene=isogroup14391 status=isotig;gnl|unk|contig12543_4 length=524 numreads=8 gene=isogroup12543 status=isotig;gnl|unk|contig06430_1 length=731 numreads=14 gene=isogroup06430 status=isotig;gnl|unk|contig0375	5	17.895	18.8344	0.846516	0.913349	0.00805514	0.0166711	1.07895		1	1	1	1	11.4	16.775	0	7.2226	By matching	By MS/MS	1709300	243750	1465500	189920	27083	162840	243750	467420
167	gnl|unk|contig04032_4	gnl|unk|contig04032_4	gnl|unk|contig04032_4 length=845 numreads=14 gene=isogroup04032 status=isotig	1	21.3075	21.4037	1.00794	1.03795	0.0857695	0.0989522	1.02977		6	1	1	1	27.8	30.276	0	4.3048	By MS/MS	By MS/MS	12008000	3223500	8784800	1501000	402940	1098100	2595400	2774400
168	gnl|unk|contig04068_5	gnl|unk|contig04068_5	gnl|unk|contig04068_5 length=843 numreads=34 gene=isogroup04068 status=isotig	1	16.6153		0.785976		0.00331756	n.d.		?variant?	1	1	1	0	6.4	30.717	0	2.3271	By MS/MS		157790	157790	0	14345	14345	0	100390	0
176	gnl|unk|contig04695_6	gnl|unk|contig04695_6	gnl|unk|contig04695_6 length=809 numreads=8 gene=isogroup04695 status=isotig	1		18.0596		0.875778	n.d.	0.00974399		?variant?	1	1	0	1	5.6	30.752	0	1.5393		By MS/MS	856580	0	856580	85658	0	85658	0	273200
184	gnl|unk|contig05311_4	gnl|unk|contig05311_4	gnl|unk|contig05311_4 length=778 numreads=28 gene=isogroup05311 status=isotig	1	26.679	25.3554	1.26203	1.22958	3.55054	1.53108	0.974284		7	1	1	1	39.4	27.971	0	33.05	By MS/MS	By MS/MS	314410000	118410000	196000000	34934000	13157000	21777000	107440000	42928000
186	gnl|unk|contig05318_6	gnl|unk|contig05318_6	gnl|unk|contig05318_6 length=777 numreads=10 gene=isogroup05318 status=isotig	1	21.9671		1.03914		0.135485	n.d.		?variant?	1	1	1	0	5.8	27.189	0.0050505	1.3432	By MS/MS		4420200	4420200	0	368350	368350	0	4099800	0
190	gnl|unk|contig05425_6	gnl|unk|contig05425_6	gnl|unk|contig05425_6 length=768 numreads=4 gene=isogroup05425 status=isotig	1		18.2405		0.884551	n.d.	0.0110458		?variant?	1	1	0	1	5.5	27.377	0	3.7746		By MS/MS	971030	0	971030	242760	0	242760	0	309700
194	gnl|unk|contig15472_2;gnl|unk|contig05463_4	gnl|unk|contig15472_2;gnl|unk|contig05463_4	gnl|unk|contig15472_2 length=343 numreads=6 gene=isogroup15472 status=isotig;gnl|unk|contig05463_4 length=769 numreads=8 gene=isogroup05463 status=isotig	2		17.8483		0.865532	n.d.	0.0084165		?variant?	1	1	0	1	17.5	13.025	0	89.654		By MS/MS	739870	0	739870	123310	0	123310	0	235980
197	gnl|unk|contig05568_6	gnl|unk|contig05568_6	gnl|unk|contig05568_6 length=763 numreads=8 gene=isogroup05568 status=isotig	1		17.1284		0.83062	n.d.	0.00510989		?variant?	1	1	0	1	7.5	27.594	0.004329	1.0172		By MS/MS	449200	0	449200	32085	0	32085	0	143270
198	gnl|unk|contig05572_4	gnl|unk|contig05572_4	gnl|unk|contig05572_4 length=767 numreads=12 gene=isogroup05572 status=isotig	1	25.9532	20.2461	1.2277	0.98181	2.14691	0.0443544	0.799713		1	1	1	1	5.9	28.227	0	1.8695	By MS/MS	By MS/MS	103720000	101170000	2556900	9429500	9197000	232450	64966000	1243600
200	gnl|unk|contig05643_4	gnl|unk|contig05643_4	gnl|unk|contig05643_4 length=762 numreads=8 gene=isogroup05643 status=isotig	1	21.2438	19.9623	1.00493	0.968045	0.0820616	0.036433	0.963301		1	1	1	1	9.1	26.155	0	8.6407	By MS/MS	By MS/MS	5975800	2772900	3202900	746980	346610	400360	2483200	1021500
202	gnl|unk|contig12559_3;gnl|unk|contig12032_2;gnl|unk|contig05728_1	gnl|unk|contig12559_3;gnl|unk|contig12032_2;gnl|unk|contig05728_1	gnl|unk|contig12559_3 length=524 numreads=6 gene=isogroup12559 status=isotig;gnl|unk|contig12032_2 length=539 numreads=6 gene=isogroup12032 status=isotig;gnl|unk|contig05728_1 length=760 numreads=10 gene=isogroup05728 status=isotig	3					n.d.	n.d.		?variant?	1	1	0	1	6.9	18.848	0	2.5047		By MS/MS	0	0	0	0	0	0	0	0
203	gnl|unk|contig05837_3	gnl|unk|contig05837_3	gnl|unk|contig05837_3 length=753 numreads=6 gene=isogroup05837 status=isotig	1	19.3531	22.3207	0.915488	1.08241	0.0221304	0.186834	1.18234		2	1	1	1	4.8	26.436	0	1.7011	By MS/MS	By MS/MS	17094000	669670	16424000	1709400	66967	1642400	669670	5238400
205	gnl|unk|contig06463_3;gnl|unk|contig05907_6;gnl|unk|contig05898_2	gnl|unk|contig06463_3;gnl|unk|contig05907_6;gnl|unk|contig05898_2	gnl|unk|contig06463_3 length=730 numreads=20 gene=isogroup06463 status=isotig;gnl|unk|contig05907_6 length=752 numreads=26 gene=isogroup05907 status=isotig;gnl|unk|contig05898_2 length=752 numreads=12 gene=isogroup05898 status=isotig	3		18.6301		0.903443	n.d.	0.0144701		?variant?	1	1	0	1	6.2	27.339	0.0045872	1.1022		By MS/MS	1272100	0	1272100	97850	0	97850	0	405710
212	gnl|unk|contig06315_1	gnl|unk|contig06315_1	gnl|unk|contig06315_1 length=735 numreads=8 gene=isogroup06315 status=isotig	1		16.7324		0.811416	n.d.	0.00388333		?variant?	1	1	0	1	4.9	27.832	0.0050251	1.2941		By MS/MS	341390	0	341390	34139	0	34139	0	108880
219	gnl|unk|contig06703_5	gnl|unk|contig06703_5	gnl|unk|contig06703_5 length=721 numreads=6 gene=isogroup06703 status=isotig	1	18.5474	17.2231	0.877375	0.835212	0.0126605	0.00545657	0.951944		1	1	1	1	6.6	24.779	0	5.0283	By MS/MS	By MS/MS	862790	383110	479680	86279	38311	47968	383110	152990
221	gnl|unk|contig06843_2	gnl|unk|contig06843_2	gnl|unk|contig06843_2 length=717 numreads=6 gene=isogroup06843 status=isotig	1	20.3511	23.4526	0.962698	1.13731	0.0442	0.409447	1.18137		2	1	1	1	22.6	25.038	0	3.5547	By MS/MS	By MS/MS	32391000	1781800	30610000	6478300	356360	6121900	1337500	11480000
224	gnl|unk|contig06947_2	gnl|unk|contig06947_2	gnl|unk|contig06947_2 length=713 numreads=12 gene=isogroup06947 status=isotig	1		19.7447		0.957494	n.d.	0.0313327		?variant?	1	1	0	1	13.9	25.87	0	3.2353		By MS/MS	2754400	0	2754400	275440	0	275440	0	878500
225	gnl|unk|contig07002_1	gnl|unk|contig07002_1	gnl|unk|contig07002_1 length=710 numreads=10 gene=isogroup07002 status=isotig	1	22.2424	23.6307	1.05216	1.14594	0.163965	0.463232	1.08913		8	1	1	1	45.6	25.41	0	4.2039	By MS/MS	By MS/MS	57626000	7471700	50155000	5762600	747170	5015500	4961600	12988000
229	gnl|unk|contig07093_4	gnl|unk|contig07093_4	gnl|unk|contig07093_4 length=708 numreads=6 gene=isogroup07093 status=isotig	1	17.751	18.4136	0.839702	0.892944	0.00728978	0.0124536	1.06341		1	1	1	1	4.2	24.808	0.0044843	1.0585	By matching	By MS/MS	1315400	220590	1094800	328840	55147	273690	220590	349170
230	gnl|unk|contig13499_6;gnl|unk|contig07185_5	gnl|unk|contig13499_6;gnl|unk|contig07185_5	gnl|unk|contig13499_6 length=498 numreads=6 gene=isogroup13499 status=isotig;gnl|unk|contig07185_5 length=704 numreads=14 gene=isogroup07185 status=isotig	2	18.0225	18.0976	0.852544	0.877621	0.00879902	0.010004	1.02941		1	1	1	1	7.8	17.83	0.0050761	1.3507	By MS/MS	By MS/MS	1145700	266260	879430	127300	29584	97715	266260	280490
231	gnl|unk|contig07231_2	gnl|unk|contig07231_2	gnl|unk|contig07231_2 length=703 numreads=14 gene=isogroup07231 status=isotig	1	18.4412	18.791	0.872351	0.911245	0.011762	0.0161771	1.04459		1	1	1	1	6.4	26.304	0	3.2923	By matching	By MS/MS	1720700	559420	1161300	143390	46619	96772	355920	453570
233	gnl|unk|contig07301_4	gnl|unk|contig07301_4	gnl|unk|contig07301_4 length=700 numreads=8 gene=isogroup07301 status=isotig	1		19.9234		0.966161	n.d.	0.035465		?variant?	1	1	0	1	9.4	25.017	0.0045662	1.0973		By MS/MS	2545800	0	2545800	212150	0	212150	0	994360
234	gnl|unk|contig07328_1	gnl|unk|contig07328_1	gnl|unk|contig07328_1 length=700 numreads=6 gene=isogroup07328 status=isotig	1					n.d.	n.d.		?variant?	1	1	1	0	7.7	25.29	0	8.3952	By MS/MS		0	0	0	0	0	0	0	0
237	gnl|unk|contig07565_2	gnl|unk|contig07565_2	gnl|unk|contig07565_2 length=692 numreads=10 gene=isogroup07565 status=isotig	1	17.9389	21.5495	0.848589	1.04502	0.00830365	0.10947	1.23147		1	1	1	1	9.1	25.101	0	2.7378	By matching	By MS/MS	8865600	350280	8515300	1773100	70056	1703100	251270	3069300
238	gnl|unk|contig07599_1	gnl|unk|contig07599_1	gnl|unk|contig07599_1 length=690 numreads=6 gene=isogroup07599 status=isotig	1	24.478	24.8705	1.15792	1.20606	0.772236	1.09399	1.04158		8	1	1	1	46.5	25.211	0	4.6336	By MS/MS	By MS/MS	126350000	28414000	97931000	11486000	2583100	8902800	23368000	30673000
244	gnl|unk|contig07875_6	gnl|unk|contig07875_6	gnl|unk|contig07875_6 length=684 numreads=56 gene=isogroup07875 status=isotig	1	19.1767		0.907145		0.0195838	n.d.		?variant?	1	1	1	0	7	23.881	0.0045249	1.0643	By MS/MS		592610	592610	0	49384	49384	0	592610	0
245	gnl|unk|contig08054_3	gnl|unk|contig08054_3	gnl|unk|contig08054_3 length=674 numreads=30 gene=isogroup08054 status=isotig	1	18.7718	20.8653	0.887989	1.01184	0.0147911	0.0681295	1.13947		1	1	1	1	4.9	23.711	0	3.7616	By matching	By MS/MS	7630200	613770	7016400	1526000	122750	1403300	447580	1910200
252	gnl|unk|contig08599_5;gnl|unk|contig08304_1	gnl|unk|contig08599_5;gnl|unk|contig08304_1	gnl|unk|contig08599_5 length=656 numreads=18 gene=isogroup08599 status=isotig;gnl|unk|contig08304_1 length=662 numreads=14 gene=isogroup08304 status=isotig	2	24.9581	24.2731	1.18063	1.1771	1.07709	0.723096	0.997008		6	1	1	1	43.4	24.011	0	94.04	By MS/MS	By MS/MS	129420000	44276000	85143000	11765000	4025100	7740300	32593000	20274000
260	gnl|unk|contig08871_4	gnl|unk|contig08871_4	gnl|unk|contig08871_4 length=645 numreads=10 gene=isogroup08871 status=isotig	1	22.5462	21.1518	1.06653	1.02573	0.202395	0.083095	0.961741		1	1	1	1	9.8	23.436	0.0046729	1.1572	By MS/MS	By MS/MS	13440000	6866500	6573800	896020	457770	438250	6124500	2329800
262	gnl|unk|contig08972_1	gnl|unk|contig08972_1	gnl|unk|contig08972_1 length=642 numreads=6 gene=isogroup08972 status=isotig	1	19.2442	19.6839	0.910337	0.954548	0.0205217	0.0300405	1.04857		1	1	1	1	3.3	23.461	0.0051546	1.3877	By matching	By MS/MS	3261800	620990	2640800	326180	62099	264080	620990	842270
264	gnl|unk|contig09269_4	gnl|unk|contig09269_4	gnl|unk|contig09269_4 length=634 numreads=16 gene=isogroup09269 status=isotig	1	20.0984	19.4583	0.950745	0.943605	0.0370983	0.0256907	0.99249		1	1	1	1	6.6	22.938	0	47.589	By MS/MS	By MS/MS	2941100	1773100	1168000	326790	197010	129780	1122600	720310
265	gnl|unk|contig09322_2	gnl|unk|contig09322_2	gnl|unk|contig09322_2 length=631 numreads=6 gene=isogroup09322 status=isotig	1	18.4864	21.7006	0.87449	1.05235	0.0121364	0.121561	1.20338		1	1	1	1	14.3	23.624	0	1.7972	By matching	By MS/MS	10280000	354870	9924700	790740	27298	763440	367250	3408300
276	gnl|unk|contig09903_2	gnl|unk|contig09903_2	gnl|unk|contig09903_2 length=611 numreads=12 gene=isogroup09903 status=isotig	1	19.9191	17.8698	0.942262	0.866574	0.0327622	0.00854276	0.919673		1	1	1	1	7.4	22.318	0	1.5279	By MS/MS	By matching	2106400	1296800	809640	300920	185250	115660	991390	239520
281	gnl|unk|contig10298_5;gnl|unk|contig10131_5	gnl|unk|contig10298_5;gnl|unk|contig10131_5	gnl|unk|contig10298_5 length=599 numreads=14 gene=isogroup10298 status=isotig;gnl|unk|contig10131_5 length=602 numreads=8 gene=isogroup10131 status=isotig	2	19.9305	20.3492	0.942803	0.986808	0.0330229	0.0476393	1.04667		1	1	1	1	7.5	22.335	0	5.2149	By MS/MS	By MS/MS	5132600	1367600	3764900	570290	151960	418330	999280	1335700
285	gnl|unk|contig10478_4	gnl|unk|contig10478_4	gnl|unk|contig10478_4 length=590 numreads=12 gene=isogroup10478 status=isotig	1	21.763	23.8124	1.02949	1.15476	0.11761	0.525434	1.12168		1	1	1	1	15.3	20.49	0	4.2342	By MS/MS	By MS/MS	44102000	5279000	38823000	6300200	754140	5546100	3558900	14732000
288	gnl|unk|contig10509_4	gnl|unk|contig10509_4	gnl|unk|contig10509_4 length=593 numreads=8 gene=isogroup10509 status=isotig	1		19.2699		0.934471	n.d.	0.0225464		?variant?	2	1	0	1	14.7	22.041	0.004386	1.038	By matching	By MS/MS	1618500	0	1618500	147130	0	147130	0	632150
292	gnl|unk|contig10722_4	gnl|unk|contig10722_4	gnl|unk|contig10722_4 length=582 numreads=6 gene=isogroup10722 status=isotig	1	16.2974	19.1682	0.770938	0.929539	0.00266148	0.0210116	1.20572		1	1	1	1	11.9	19.999	0.0052632	1.4613	By matching	By MS/MS	1634900	126580	1508300	204360	15823	188540	80537	589120
294	gnl|unk|contig10820_1	gnl|unk|contig10820_1	gnl|unk|contig10820_1 length=582 numreads=10 gene=isogroup10820 status=isotig	1	18.0856	19.9355	0.855528	0.966746	0.00919228	0.0357625	1.13		1	1	1	1	7.2	21.434	0	1.6251	By MS/MS	By MS/MS	3580900	437210	3143700	511560	62458	449100	278160	1002700
296	gnl|unk|contig10871_6	gnl|unk|contig10871_6	gnl|unk|contig10871_6 length=580 numreads=8 gene=isogroup10871 status=isotig	1		20.4845		0.993373	n.d.	0.0523258		?variant?	1	1	0	1	5.2	22.068	0.0046512	1.1498		By MS/MS	4600000	0	4600000	1533300	0	1533300	0	1467100
297	gnl|unk|contig10892_6	gnl|unk|contig10892_6	gnl|unk|contig10892_6 length=579 numreads=10 gene=isogroup10892 status=isotig	1	21.4501	21.4503	1.01469	1.0402	0.0946789	0.102194	1.02515		1	1	1	1	6.7	21.464	0	102.11	By MS/MS	By MS/MS	13332000	4116800	9215100	1904600	588120	1316400	2865000	2865300
299	gnl|unk|contig10963_4	gnl|unk|contig10963_4	gnl|unk|contig10963_4 length=575 numreads=14 gene=isogroup10963 status=isotig	1	18.6154	19.7002	0.88059	0.955338	0.0132712	0.0303819	1.08488		1	1	1	1	5.8	19.659	0	2.8839	By matching	By MS/MS	3118600	458170	2660400	259880	38181	221700	401590	851840
300	gnl|unk|contig11034_2	gnl|unk|contig11034_2	gnl|unk|contig11034_2 length=574 numreads=10 gene=isogroup11034 status=isotig	1	24.7274	24.3457	1.16972	1.18062	0.917972	0.760402	1.00932		5	1	1	1	49.7	21.096	0	40.335	By MS/MS	By MS/MS	93253000	46797000	46456000	8477500	4254300	4223200	27778000	21320000
302	gnl|unk|contig11086_2	gnl|unk|contig11086_2	gnl|unk|contig11086_2 length=572 numreads=8 gene=isogroup11086 status=isotig	1	18.2808		0.864766		0.0105247	n.d.		?variant?	1	1	1	0	8.4	21.001	0	6.1626	By MS/MS		318480	318480	0	53080	53080	0	318480	0
304	gnl|unk|contig11153_1	gnl|unk|contig11153_1	gnl|unk|contig11153_1 length=572 numreads=6 gene=isogroup11153 status=isotig	1	21.0601	21.4252	0.996235	1.03899	0.0722501	0.100436	1.04292		3	1	0	1	26.7	20.806	0	27.679	By MS/MS	By MS/MS	12381000	3767800	8613100	1375600	418640	957010	2186300	2816000
305	gnl|unk|contig11270_2	gnl|unk|contig11270_2	gnl|unk|contig11270_2 length=566 numreads=16 gene=isogroup11270 status=isotig	1	18.1575	19.0625	0.85893	0.924414	0.0096622	0.0195276	1.07624		1	1	1	1	7.4	20.01	0.0044444	1.0529	By matching	By MS/MS	2009000	292380	1716700	287000	41768	245240	292380	547510
306	gnl|unk|contig11282_3	gnl|unk|contig11282_3	gnl|unk|contig11282_3 length=564 numreads=6 gene=isogroup11282 status=isotig	1	17.5135	18.5337	0.828465	0.898767	0.00618304	0.0135346	1.08486		2	1	1	1	14.4	20.3	0.0053476	1.5026	By matching	By MS/MS	1376900	187100	1189800	114740	15591	99152	187100	379480
307	gnl|unk|contig11472_2	gnl|unk|contig11472_2	gnl|unk|contig11472_2 length=560 numreads=6 gene=isogroup11472 status=isotig	1		18.2013		0.882649	n.d.	0.0107494		?variant?	1	1	1	1	9.6	19.764	0.0046083	1.1184	By MS/MS	By MS/MS	944950	0	944950	118120	0	118120	0	301390
310	gnl|unk|contig11618_1	gnl|unk|contig11618_1	gnl|unk|contig11618_1 length=554 numreads=8 gene=isogroup11618 status=isotig	1	22.2169	22.5904	1.05096	1.09549	0.161099	0.225235	1.04237		1	1	1	1	8.6	19.491	0	3.495	By MS/MS	By matching	27188000	6762600	20425000	6797000	1690700	5106300	4874900	6315100
311	gnl|unk|contig11629_3	gnl|unk|contig11629_3	gnl|unk|contig11629_3 length=555 numreads=8 gene=isogroup11629 status=isotig	1	19.9491	18.7789	0.94368	0.910658	0.0334499	0.0160419	0.965007		6	1	1	1	48.1	19.767	0	3.6992	By MS/MS	By matching	2742400	1590900	1151600	457070	265150	191930	1012200	449780
314	gnl|unk|contig11689_3	gnl|unk|contig11689_3	gnl|unk|contig11689_3 length=552 numreads=8 gene=isogroup11689 status=isotig	1	18.8384	21.0164	0.891141	1.01917	0.01549	0.0756551	1.14367		1	1	1	1	7.1	20.647	0.0045045	1.062	By MS/MS	By MS/MS	7583400	932610	6650800	842600	103620	738970	468730	2121200
321	gnl|unk|contig12055_6	gnl|unk|contig12055_6	gnl|unk|contig12055_6 length=541 numreads=8 gene=isogroup12055 status=isotig	1	22.3757	20.6953	1.05847	1.00359	0.179837	0.0605576	0.948156		1	1	1	1	6.1	18.761	0	3.2469	By MS/MS	By MS/MS	12346000	7168500	5177800	1763800	1024100	739690	5441900	1697900
322	gnl|unk|contig13380_4;gnl|unk|contig12744_5;gnl|unk|contig12077_1	gnl|unk|contig13380_4;gnl|unk|contig12744_5;gnl|unk|contig12077_1	gnl|unk|contig13380_4 length=501 numreads=6 gene=isogroup13380 status=isotig;gnl|unk|contig12744_5 length=517 numreads=6 gene=isogroup12744 status=isotig;gnl|unk|contig12077_1 length=532 numreads=16 gene=isogroup12077 status=isotig	3	22.7746	22.34	1.07734	1.08335	0.237127	0.189344	1.00557		1	1	1	1	6	17.221	0.005102	1.3575	By MS/MS	By MS/MS	27316000	8510100	18806000	3414500	1063800	2350700	7175500	5308800
327	gnl|unk|contig12302_4	gnl|unk|contig12302_4	gnl|unk|contig12302_4 length=535 numreads=10 gene=isogroup12302 status=isotig	1	21.672	23.7395	1.02518	1.15122	0.110419	0.49954	1.12294		4	1	1	1	26.4	19.154	0	10.008	By MS/MS	By MS/MS	86231000	11518000	74713000	9581200	1279800	8301400	3341300	14006000
332	gnl|unk|contig12651_4	gnl|unk|contig12651_4	gnl|unk|contig12651_4 length=519 numreads=6 gene=isogroup12651 status=isotig	1	21.1089	20.0334	0.998546	0.971493	0.0747385	0.0382734	0.972908		2	1	1	1	19.7	18.437	0	2.4804	By MS/MS	By matching	9823700	7076300	2747400	1228000	884540	343420	2261600	1073100
333	gnl|unk|contig12669_4	gnl|unk|contig12669_4	gnl|unk|contig12669_4 length=521 numreads=8 gene=isogroup12669 status=isotig	1		17.5859		0.852808	n.d.	0.00701696		?variant?	1	1	0	1	8.1	18.543	0.004902	1.2264		By MS/MS	616840	0	616840	88120	0	88120	0	196740
334	gnl|unk|contig12734_4	gnl|unk|contig12734_4	gnl|unk|contig12734_4 length=519 numreads=8 gene=isogroup12734 status=isotig	1		18.906		0.916822	n.d.	0.0175196		?variant?	2	1	0	1	19.7	19.752	0.0049505	1.2415	By matching	By MS/MS	1257600	0	1257600	179660	0	179660	0	491210
335	gnl|unk|contig12742_5	gnl|unk|contig12742_5	gnl|unk|contig12742_5 length=517 numreads=6 gene=isogroup12742 status=isotig	1		16.8076		0.815066	n.d.	0.00409126		?variant?	1	1	0	1	6.9	18.976	0.0043668	1.0195		By MS/MS	359650	0	359650	35965	0	35965	0	114710
337	gnl|unk|contig12793_1	gnl|unk|contig12793_1	gnl|unk|contig12793_1 length=517 numreads=8 gene=isogroup12793 status=isotig	1	22.182	22.6762	1.04931	1.09966	0.15724	0.239045	1.04798		1	1	1	1	6.9	17.882	0	1.9942	By MS/MS	By MS/MS	33721000	5899200	27821000	4817200	842740	3974500	4758100	6702300
340	gnl|unk|contig13078_1	gnl|unk|contig13078_1	gnl|unk|contig13078_1 length=507 numreads=8 gene=isogroup13078 status=isotig	1	24.5201	26.5892	1.15991	1.28941	0.795104	3.60086	1.11165		3	1	1	1	24.9	17.377	0	34.825	By MS/MS	By MS/MS	549650000	52459000	497190000	68706000	6557300	62148000	24060000	100960000
346	gnl|unk|contig13282_2	gnl|unk|contig13282_2	gnl|unk|contig13282_2 length=502 numreads=6 gene=isogroup13282 status=isotig	1		17.1946		0.833831	n.d.	0.00534992		?variant?	1	1	0	1	8.4	18.579	0	1.5688		By MS/MS	470310	0	470310	52257	0	52257	0	150000
347	gnl|unk|contig13468_5	gnl|unk|contig13468_5	gnl|unk|contig13468_5 length=499 numreads=6 gene=isogroup13468 status=isotig	1	19.8349	19.4875	0.938278	0.945023	0.0309043	0.0262168	1.00719		2	1	1	1	13.2	18.333	0	5.8209	By MS/MS	By MS/MS	3427100	1190800	2236200	342710	119080	223620	935170	735060
349	gnl|unk|contig13658_3	gnl|unk|contig13658_3	gnl|unk|contig13658_3 length=494 numreads=6 gene=isogroup13658 status=isotig	1		17.9536		0.870639	n.d.	0.00905385		?variant?	1	1	0	1	7.9	19.499	0.0045455	1.0694		By MS/MS	795920	0	795920	72356	0	72356	0	253850
350	gnl|unk|contig13681_1	gnl|unk|contig13681_1	gnl|unk|contig13681_1 length=493 numreads=6 gene=isogroup13681 status=isotig	1	25.2384	23.856	1.19389	1.15687	1.30812	0.541555	0.968992		5	1	1	1	42.4	17.685	0.0052083	1.4475	By MS/MS	By MS/MS	106080000	56097000	49981000	15154000	8013900	7140200	39584000	15184000
355	gnl|unk|contig13950_2	gnl|unk|contig13950_2	gnl|unk|contig13950_2 length=486 numreads=6 gene=isogroup13950 status=isotig	1		20.5787		0.997937	n.d.	0.0558532		?variant?	1	1	1	1	4.9	17.181	0.0044053	1.0417	By matching	By MS/MS	10180000	6170900	4009400	1018000	617090	400940	0	1566000
360	gnl|unk|contig14318_3	gnl|unk|contig14318_3	gnl|unk|contig14318_3 length=476 numreads=8 gene=isogroup14318 status=isotig	1	15.599	17.4055	0.737902	0.844058	0.00164018	0.006192	1.14386		1	1	1	1	7	18.74	0	2.282	By matching	By MS/MS	593960	49632	544330	53996	4512	49484	49632	173610
365	gnl|unk|contig14600_3	gnl|unk|contig14600_3	gnl|unk|contig14600_3 length=465 numreads=6 gene=isogroup14600 status=isotig	1					n.d.	n.d.		?variant?	1	1	1	0	5.2	16.457	0	1.6279	By MS/MS		0	0	0	0	0	0	0	0
366	gnl|unk|contig14706_2	gnl|unk|contig14706_2	gnl|unk|contig14706_2 length=463 numreads=10 gene=isogroup14706 status=isotig	1	21.2582		1.00561		0.0828845	n.d.		?variant?	1	1	1	0	12.3	16.261	0.0046948	1.1605	By MS/MS		3942100	3942100	0	657020	657020	0	2508100	0
367	gnl|unk|contig14879_5	gnl|unk|contig14879_5	gnl|unk|contig14879_5 length=449 numreads=8 gene=isogroup14879 status=isotig	1	19.4538	20.4002	0.920254	0.989283	0.0237312	0.0493548	1.07501		2	1	1	1	26	16.285	0.0052356	1.4493	By MS/MS	By matching	4006000	2187100	1818900	801200	437420	363780	718110	1383800
368	gnl|unk|contig14978_5	gnl|unk|contig14978_5	gnl|unk|contig14978_5 length=442 numreads=6 gene=isogroup14978 status=isotig	1	20.7876	21.6271	0.983345	1.04878	0.0598146	0.115519	1.06654		1	1	1	1	13.5	15.818	0	27.027	By MS/MS	By MS/MS	12458000	2940600	9517400	2491600	588120	1903500	1810000	3238900
370	gnl|unk|contig15163_3	gnl|unk|contig15163_3	gnl|unk|contig15163_3 length=419 numreads=6 gene=isogroup15163 status=isotig	1		19.8237		0.961328	n.d.	0.0330975		?variant?	3	1	0	1	36.7	15.201	0.0044643	1.0556	By matching	By MS/MS	2375900	0	2375900	339410	0	339410	0	927980
77	gnl|unk|contig01081_1;gnl|unk|contig13646_1;gnl|unk|contig01985_1;gnl|unk|contig15475_2	gnl|unk|contig01081_1;gnl|unk|contig13646_1;gnl|unk|contig01985_1	gnl|unk|contig01081_1 length=1154 numreads=12 gene=isogroup01081 status=isotig;gnl|unk|contig13646_1 length=494 numreads=2 gene=isogroup13646 status=isotig;gnl|unk|contig01985_1 length=1016 numreads=8 gene=isogroup01985 status=isotig	4	24.9628	25.294	1.18085	1.2266	1.08063	1.46727	1.03874		7	0	0	0	22.3	40.322	0	12.394	By MS/MS	By MS/MS	200220000	50948000	149270000	14301000	3639200	10662000	32700000	41139000
116	gnl|unk|contig02027_3;gnl|unk|contig13305_2;gnl|unk|contig02803_4	gnl|unk|contig02027_3;gnl|unk|contig13305_2;gnl|unk|contig02803_4	gnl|unk|contig02027_3 length=1011 numreads=8 gene=isogroup02027 status=isotig;gnl|unk|contig13305_2 length=503 numreads=22 gene=isogroup13305 status=isotig;gnl|unk|contig02803_4 length=930 numreads=6 gene=isogroup02803 status=isotig	3	18.9373	19.8894	0.895818	0.964511	0.0165888	0.0346383	1.07668		2	0	0	0	8.3	35.942	0	12.275	By MS/MS	By MS/MS	3268700	799750	2469000	148580	36352	112230	501980	971180
179	gnl|unk|contig04794_5	gnl|unk|contig04794_5	gnl|unk|contig04794_5 length=804 numreads=41 gene=isogroup04794 status=isotig	1	20.1089	19.9246	0.951242	0.966221	0.0373692	0.0354953	1.01575		2	0	0	0	11.6	28.696	0	8.3648	By matching	By MS/MS	4548200	1390800	3157400	303210	92723	210490	1130800	995210
189	gnl|unk|contig05411_6	gnl|unk|contig05411_6	gnl|unk|contig05411_6 length=772 numreads=18 gene=isogroup05411 status=isotig	1	22.805	23.1633	1.07878	1.12328	0.24217	0.335044	1.04125		2	0	0	0	16	26.494	0	5.4678	By MS/MS	By MS/MS	54483000	12759000	41724000	9080400	2126500	6954000	7328100	9393900
277	gnl|unk|contig09969_5	gnl|unk|contig09969_5	gnl|unk|contig09969_5 length=609 numreads=12 gene=isogroup09969 status=isotig	1	28.3538	27.8471	1.34126	1.35041	11.3367	8.61159	1.00682		5	0	0	0	32	21.416	0	1.9898	By MS/MS	By MS/MS	2671800000	992960000	1678900000	267180000	99296000	167890000	343050000	241450000
318	gnl|unk|contig11902_4;gnl|unk|contig12341_1;gnl|unk|contig11226_5	gnl|unk|contig11902_4;gnl|unk|contig12341_1	gnl|unk|contig11902_4 length=546 numreads=10 gene=isogroup11902 status=isotig;gnl|unk|contig12341_1 length=531 numreads=6 gene=isogroup12341 status=isotig	3	20.6152	20.4211	0.975192	0.990297	0.0530797	0.0500753	1.01549		4	0	0	0	27.5	19.49	0	244.86	By MS/MS	By MS/MS	6154200	1761000	4393100	559470	160090	399370	1606200	1404000
354	gnl|unk|contig13834_5;gnl|unk|contig01736_5	gnl|unk|contig13834_5;gnl|unk|contig01736_5	gnl|unk|contig13834_5 length=488 numreads=8 gene=isogroup13834 status=isotig;gnl|unk|contig01736_5 length=1044 numreads=14 gene=isogroup01736 status=isotig	2		18.4736		0.895856	n.d.	0.0129828		?variant?	2	0	0	0	17.8	17.376	0.0047393	1.178	By matching	By MS/MS	1141300	0	1141300	114130	0	114130	0	364010
